# Supplementary material for: Effect of broccoli extract supplement on carcass traits and lipid metabolism in Holstein steers.
Source: Frontiers journal article supplement (doi:10.3389/fgene.2025.1618682), 2025-01-01
Supplement: Data_Sheet_1.zip [file Data_Sheet_1.zip]

## Sheet: GeneCorMet_liver
	23-Nordeoxycholic acid	L-Tryptophan	PC (18:0/20:4)	11(E)-Eicosenoic Acid	10-Hydroxydecanoic acid	PC (18:0/20:3)	SM (d14:1/20:0)	PC (16:0/16:1)	PC (18:0/22:4)	2-(3,4-dimethoxyphenyl)ethanamine	PC (16:0/18:1)	PC (16:1e/18:2)	PC (18:1e/18:2)	methadone-d9	(2R,3S,4S,5R,6R)-2-(hydroxymethyl)-6-(propan-2-yloxy)oxane-3,4,5-triol	PC (16:1e/19:2)	ACar 15:1	Biliverdin	Bicyclo prostaglandin E2	2-(2-amino-3-methylbutanamido)-3-phenylpropanoic acid	PC (17:0/18:2)	ACar 20:1	Palmitoylcarnitine	cis-gondoic acid	ACar 20:0	ACar 18:0	16-Heptadecyne-1,2,4-triol	5-OxoETE	ACar 18:1	PC (18:1e/14:1)	9-Oxo-ODE	PC (18:3e/20:2)	PC (20:0/20:3)	Prostaglandin E2	2-[(3S)-1-(2-Methylbenzyl)-3-pyrrolidinyl]-1H-imidazo[4,5-b]pyridine	4,6,8-trihydroxy-7-methoxy-3-methyl-3,4-dihydro-1H-2-benzopyran-1-one	PC (14:1e/19:2)	PC (18:3e/15:0)	Radicinin	PC (14:0e/18:0)	PC (18:1e/16:2)	ACar 13:0	PC (19:1/18:2)	PC (18:5e/4:0)	PC (20:5e/15:1)	DL-Dipalmitoylphosphatidylcholine	2-(2,4-dihydroxyphenyl)-3,5,7-trihydroxy-4H-chromen-4-one	4-morpholino-3-nitrobenzene-1-sulfonamide	PC (18:4e/17:1)
SLC22A2	0.963261	0.832566	0.692276	0.165698	0.682698	0.0716965	-0.0340114	-0.160258	0.0980197	0.772259	-0.109152	0.0404646	0.307779	-0.000769942	0.742477	-0.155083	0.661533	0.953232	0.472519	-0.139456	-0.0792648	0.810291	0.968028	0.623932	0.773307	0.89076	0.213988	0.340054	0.811276	0.248389	0.526063	-0.0237164	0.719367	0.708561	0.531542	0.261389	-0.316702	-0.0426867	0.248947	0.798679	0.80642	0.28792	-0.0466901	0.556347	-0.0935526	0.47098	0.273021	0.577459	-0.362658
C7orf57	-0.0955012	-0.288916	0.302826	-0.0460922	0.271382	0.740772	0.0961429	0.568594	0.806688	0.113538	0.523697	0.440133	0.728715	0.54287	-0.189087	0.0627706	0.103895	-0.273571	-0.167613	0.731845	-0.0164291	0.250158	-0.13702	-0.183528	0.207274	0.117712	0.76277	0.321674	0.0103536	-0.453729	-0.235411	0.772276	-0.0474424	0.489711	-0.23275	0.555346	0.358403	-0.178559	0.49589	-0.268473	-0.423868	0.677951	0.115461	0.209682	0.0739383	-0.255121	0.638608	0.349929	0.724021
SLCO4A1	0.319322	0.348707	0.576018	0.367643	0.125343	0.621472	0.718078	0.276442	0.506221	0.689288	-0.0541491	0.000724539	0.352364	0.388959	0.628228	-0.261178	0.370232	0.437696	0.954923	0.197534	0.21591	0.507979	0.340995	0.922926	0.382438	0.33388	0.202246	0.44519	0.247155	0.40014	0.805705	-0.303681	0.468883	0.414732	0.0610445	0.678989	0.545347	0.184781	0.229233	0.317381	0.359058	0.104258	-0.0975519	0.463959	0.447884	0.58009	0.544223	0.681825	-0.0163471
SLC5A8	0.833224	0.748198	0.587077	0.305835	0.612343	0.153061	0.205129	-0.039031	0.122448	0.740804	-0.296884	-0.1305	0.193302	-0.0262952	0.70943	-0.278371	0.570597	0.905896	0.70366	-0.145513	-0.0361833	0.72224	0.874583	0.769981	0.555175	0.727645	0.0174546	0.302006	0.605059	0.249845	0.716421	-0.196957	0.663767	0.617806	0.530441	0.282622	-0.135448	-0.0625627	0.0754	0.899624	0.864151	0.265049	-0.150664	0.40926	-0.137814	0.610944	0.216145	0.489867	-0.438285
SDS	0.832502	0.766826	0.666553	0.322904	0.571194	0.228056	0.282483	-0.0259019	0.188511	0.813132	-0.222131	-0.0705648	0.252184	0.0649871	0.777258	-0.268974	0.611357	0.908206	0.769503	-0.100932	0.0167667	0.759868	0.86996	0.849256	0.630538	0.75344	0.0877929	0.362978	0.649286	0.331917	0.76234	-0.219187	0.69556	0.637933	0.482392	0.369018	-0.0592768	0.0136714	0.142922	0.833218	0.838352	0.234104	-0.127748	0.497899	-0.000793762	0.647626	0.29985	0.591045	-0.402025
POU2AF2	0.79127	0.517785	0.742376	0.100806	0.821389	0.471554	-0.103184	0.188308	0.569965	0.766288	0.154473	0.215865	0.705347	0.276507	0.419201	-0.199509	0.78351	0.639656	0.177105	0.446304	-0.291287	0.928397	0.798079	0.342081	0.844415	0.922772	0.671026	0.395572	0.818609	-0.152071	0.206405	0.468792	0.55841	0.975081	0.38748	0.454211	-0.212628	-0.341943	0.424011	0.54708	0.449729	0.818819	-0.0703078	0.482717	-0.187062	0.261056	0.538507	0.666635	0.103116
SNCA	0.0907908	0.177626	0.444507	0.475593	0.119516	0.700689	0.797447	0.482408	0.589644	0.533262	0.00175009	0.0460743	0.345292	0.474552	0.433926	-0.211842	0.260478	0.229691	0.856471	0.312663	0.253959	0.372578	0.157866	0.7785	0.199207	0.163033	0.168664	0.425038	0.0747603	0.291172	0.736323	-0.178205	0.31312	0.329769	0.0406831	0.63445	0.660915	0.170208	0.143019	0.251332	0.240687	0.190815	-0.057917	0.285489	0.385928	0.556129	0.478893	0.514377	0.0476823
FABP4	-0.203779	-0.0709471	0.176038	0.296808	-0.30004	0.53956	0.772824	0.34369	0.392028	0.25532	-0.0629169	-0.0662465	0.129318	0.354121	0.281552	-0.161996	-0.0365886	-0.0482743	0.782032	0.183493	0.291212	0.0356741	-0.190653	0.646905	-0.0761348	-0.188805	0.0135332	0.271327	-0.23453	0.352265	0.600893	-0.396832	0.115987	-0.0320226	-0.211702	0.541478	0.763766	0.251685	0.0785628	-0.0985859	-0.0570912	-0.152988	-0.0556664	0.16283	0.549197	0.346802	0.374485	0.36997	0.146363
BCL6	-0.196261	-0.00348918	0.23521	0.412714	-0.219548	0.576559	0.849056	0.419799	0.431172	0.282363	0.0340132	0.0463648	0.160172	0.447551	0.329955	-0.087241	-0.0199682	-0.0152337	0.79941	0.176878	0.401279	0.0538582	-0.151424	0.672094	-0.0404978	-0.157056	0.0185654	0.344433	-0.194208	0.404456	0.657093	-0.327613	0.141353	-0.0123368	-0.152958	0.550126	0.798054	0.358669	0.0915078	-0.0414937	0.00888091	-0.14172	0.0240039	0.200971	0.581753	0.427613	0.372554	0.363393	0.0912051
GADD45B	-0.0494978	0.107632	0.333241	0.389101	-0.137296	0.602071	0.782259	0.437877	0.471957	0.364081	0.00879159	0.0632653	0.275097	0.455521	0.449184	-0.0534523	0.0443347	0.110845	0.850693	0.169089	0.343183	0.185791	-0.0352739	0.730108	0.0859064	-0.0323202	0.130683	0.448174	-0.0934349	0.452827	0.717777	-0.302697	0.300226	0.103913	-0.0760571	0.659821	0.808447	0.310761	0.224128	0.0135893	0.0307819	-0.0930639	0.0767523	0.302513	0.619918	0.398177	0.484603	0.510718	0.170098
EPHA5	0.589112	0.20894	0.575539	-0.111038	0.724299	0.498771	-0.142002	0.156997	0.584841	0.510627	0.261156	0.242113	0.652027	0.205853	0.135841	-0.204173	0.4947	0.377724	-0.029008	0.465856	-0.196083	0.668602	0.548401	0.0747725	0.56926	0.670619	0.645746	0.239374	0.497948	-0.51283	-0.0723906	0.680684	0.26026	0.87155	0.114592	0.403655	-0.223268	-0.356733	0.402963	0.397597	0.252412	0.833882	-0.132242	0.410186	-0.353694	0.00614827	0.541036	0.458443	0.236121
ASPHD2	0.495167	0.59249	0.534738	0.455579	0.285116	0.347527	0.62228	0.176087	0.23434	0.61832	-0.173645	-0.0151811	0.176558	0.208507	0.761191	-0.125673	0.281027	0.675684	0.968512	-0.167918	0.32013	0.47121	0.534173	0.924963	0.333415	0.382706	-0.0414515	0.450188	0.269777	0.495009	0.920831	-0.346385	0.591076	0.348481	0.310443	0.49751	0.379127	0.287902	0.141509	0.629983	0.637678	-0.0388997	0.0123112	0.454651	0.29288	0.646099	0.338116	0.525088	-0.29574
KBTBD12	-0.243889	-0.0858289	0.20257	0.345214	-0.277446	0.598958	0.805118	0.416707	0.460629	0.262864	0.023311	0.0115942	0.184239	0.442289	0.263096	-0.124935	-0.0129739	-0.090494	0.749664	0.255963	0.318502	0.0464382	-0.214069	0.623859	-0.0488382	-0.183032	0.071355	0.310271	-0.213353	0.356509	0.584065	-0.326003	0.101099	-0.0138204	-0.213959	0.563903	0.803276	0.280803	0.104081	-0.138744	-0.0916395	-0.108408	-0.0142387	0.167851	0.587407	0.359868	0.399194	0.379773	0.181154
MPO	0.222796	0.462044	0.312184	0.258466	0.414166	0.0389752	-0.106815	0.447717	0.128162	-0.141288	0.574049	0.811526	0.46655	0.42585	0.415249	0.934111	-0.250486	0.243773	-0.142064	-0.29835	0.521912	0.082416	0.178041	-0.17038	0.27417	0.169076	0.395786	0.705303	0.128761	0.366816	0.135746	0.639225	0.481054	0.111586	0.361489	0.322462	0.314399	0.541701	0.684912	0.0610589	-0.0689828	-0.0951475	0.925102	0.45935	0.416045	-0.228535	0.310401	0.21821	0.310849
RSPH14	0.936105	0.809652	0.774842	0.229533	0.863112	0.204775	-0.0865014	0.0292691	0.28592	0.766478	0.145453	0.284247	0.511881	0.194339	0.65628	-0.0237928	0.728787	0.875394	0.26519	0.0565546	-0.0616635	0.879568	0.968499	0.451587	0.878452	0.972503	0.433985	0.44392	0.904667	0.13602	0.384092	0.317412	0.694453	0.841445	0.569307	0.301965	-0.315448	-0.0464424	0.368582	0.747248	0.721452	0.513773	0.0850048	0.580566	-0.116931	0.413378	0.353917	0.586984	-0.227049
FHIT	0.0114022	-0.165308	0.174406	-0.312859	0.189999	0.325691	-0.325102	0.345001	0.433038	-0.20749	0.548456	0.560646	0.643321	0.318376	-0.104549	0.481206	-0.237539	-0.204029	-0.438203	0.263756	0.0657329	0.0527783	-0.153748	-0.475215	0.155077	0.0349364	0.733837	0.371987	-0.0816678	-0.335622	-0.415287	0.840736	0.077391	0.278811	-0.185832	0.447745	0.225531	-0.0300742	0.728856	-0.380127	-0.572808	0.3148	0.455905	0.325594	0.155243	-0.670126	0.57363	0.275537	0.833779
TBATA	0.10146	0.389053	0.235832	0.630768	0.16495	0.314168	0.641301	0.52217	0.219073	0.231356	-0.148581	0.0709049	0.129568	0.308028	0.531941	0.170679	-0.0256615	0.347424	0.791233	-0.162191	0.381577	0.173189	0.181134	0.644891	0.00590167	0.0296568	-0.12531	0.507618	-0.0558963	0.548533	0.85364	-0.247959	0.465351	0.0546369	0.364963	0.422789	0.656581	0.334671	0.0928548	0.424138	0.329887	-0.111404	0.282612	0.155251	0.368394	0.488644	0.195597	0.267987	-0.108196
ADRB3	-0.0788233	0.0848311	0.341084	0.464158	-0.0412933	0.679361	0.776751	0.573694	0.573386	0.370345	0.0472586	0.10761	0.358018	0.532843	0.38677	-0.0426567	0.105995	0.0713211	0.788659	0.298084	0.286464	0.237012	-0.0346734	0.673273	0.107705	0.000675347	0.203477	0.482502	-0.0582028	0.395467	0.689817	-0.185604	0.293838	0.172745	-0.0145578	0.670263	0.826753	0.236452	0.224384	0.0280752	0.00697042	0.0606237	0.0987988	0.241709	0.567017	0.411446	0.49504	0.500302	0.223048
C11orf96	0.539799	0.551762	0.71006	0.324283	0.297541	0.578986	0.589151	0.288349	0.489507	0.684126	0.0454673	0.184665	0.493661	0.399699	0.817691	-0.0240286	0.294172	0.633936	0.938122	0.0156276	0.331789	0.588302	0.502609	0.898981	0.506216	0.461773	0.326208	0.638903	0.316927	0.45109	0.845039	-0.119829	0.680791	0.520189	0.175005	0.796047	0.540039	0.290472	0.48415	0.429162	0.41054	0.0746515	0.132224	0.683442	0.493124	0.455442	0.680012	0.799631	0.0659588
LRRTM3	-0.258277	0.0609074	0.356521	0.576394	-0.0424541	0.708972	0.802474	0.749041	0.637036	0.213922	0.432393	0.491926	0.460047	0.791093	0.344904	0.31374	-0.0260834	-0.100952	0.566568	0.314103	0.546726	0.100895	-0.188761	0.465604	0.118003	-0.0938239	0.329617	0.637701	-0.0871858	0.496507	0.566533	0.089081	0.230497	0.0619192	-0.0420673	0.671259	0.956539	0.529532	0.375299	-0.190118	-0.176795	-0.0200364	0.426657	0.304277	0.785016	0.318909	0.511092	0.435229	0.336106
SOD3	-0.0191022	0.353012	0.397507	0.750507	0.210049	0.569153	0.7464	0.786928	0.509965	0.273058	0.247782	0.4379	0.4161	0.68654	0.531956	0.382189	0.0359723	0.199326	0.682461	0.0982774	0.52602	0.23149	0.0840921	0.572239	0.172942	0.0675086	0.194422	0.730771	0.0368469	0.618596	0.787785	0.0437834	0.467972	0.139517	0.303241	0.609219	0.866958	0.503893	0.327827	0.186258	0.123696	0.00341051	0.512058	0.290569	0.640747	0.46259	0.401467	0.413903	0.130735
MKX	0.144674	0.458942	0.35753	0.344323	-0.00447188	0.219894	0.408235	0.413093	0.161075	0.0599696	0.26607	0.504167	0.338108	0.440319	0.712867	0.682775	-0.30324	0.307871	0.569927	-0.384941	0.65496	0.0578852	0.0691329	0.439587	0.170437	-0.00582217	0.200502	0.764686	-0.0660106	0.755847	0.656486	-0.0172968	0.603472	-0.0474454	0.172186	0.627832	0.775162	0.704059	0.631416	0.00655438	-0.0331934	-0.461306	0.743058	0.56733	0.841064	0.0457508	0.475477	0.490702	0.26981
CCL24	-0.128437	0.101203	0.262706	0.477189	-0.0996906	0.555841	0.818717	0.515177	0.4238	0.232575	0.066439	0.148118	0.21599	0.471334	0.407041	0.0767489	-0.0959631	0.0683544	0.797416	0.0717021	0.485169	0.0636863	-0.0898905	0.643772	-0.0380099	-0.133188	0.0346688	0.46556	-0.20485	0.443735	0.716022	-0.216907	0.248119	0.010147	-0.0330106	0.589305	0.843119	0.422121	0.183415	0.0587458	0.048029	-0.144467	0.185484	0.248724	0.580901	0.391623	0.397275	0.363749	0.115152
SIX1	0.205886	0.29617	0.3021	0.510299	0.177641	0.421848	0.608316	0.337988	0.329301	0.539745	-0.351329	-0.250331	0.128029	0.202292	0.420218	-0.350289	0.390541	0.37655	0.838375	0.180184	-0.0254367	0.42714	0.313419	0.785917	0.175673	0.245052	-0.0680102	0.260205	0.18613	0.33864	0.78089	-0.418886	0.377937	0.290202	0.289092	0.373384	0.400392	-0.0623503	-0.111061	0.473262	0.441149	0.19533	-0.19615	0.0582469	0.139452	0.658508	0.193602	0.374548	-0.200784
FICD	0.218715	0.37935	0.374138	0.401289	0.590102	0.360129	0.0904901	0.727259	0.434775	-0.00221964	0.465565	0.70552	0.624759	0.525247	0.35191	0.712218	-0.123835	0.24341	0.0456542	-0.00778913	0.407119	0.243971	0.216394	-0.0341141	0.243082	0.220277	0.473562	0.750483	0.0919885	0.164582	0.274852	0.724782	0.486966	0.337744	0.409074	0.497329	0.468613	0.307659	0.630172	0.241904	-0.00261054	0.268482	0.759667	0.367466	0.245142	-0.0868752	0.446705	0.288816	0.393123
S100A9	-0.123883	0.0270748	0.216535	0.256787	-0.311241	0.463248	0.768081	0.262018	0.300975	0.225821	-0.0202695	0.00685149	0.102499	0.321362	0.406617	-0.0428123	-0.150284	0.0459767	0.830083	-0.0136513	0.446531	-0.00889918	-0.147746	0.680917	-0.0725274	-0.195441	-0.0225129	0.331956	-0.263456	0.434731	0.653051	-0.405376	0.186756	-0.0763525	-0.217819	0.569928	0.773914	0.412117	0.168261	-0.0634836	-0.00959183	-0.316285	0.0476947	0.29778	0.626227	0.305714	0.403105	0.394022	0.112545
ADAM22	0.610238	0.593692	0.93612	0.486161	0.8101	0.756939	0.39033	0.5053	0.809911	0.847405	0.547339	0.612391	0.829713	0.731918	0.599037	0.0454841	0.73421	0.576237	0.404163	0.503751	0.208643	0.878624	0.700029	0.551421	0.888533	0.844653	0.725628	0.690674	0.791141	0.155086	0.473162	0.553646	0.578844	0.909775	0.353098	0.657908	0.202414	0.166385	0.532106	0.470971	0.465505	0.687692	0.205491	0.668569	0.233025	0.528897	0.670294	0.752508	0.0693497
SGK1	-0.125801	-0.0496535	0.354406	0.162077	-0.27553	0.66531	0.747145	0.344623	0.52996	0.285398	0.219495	0.195224	0.346466	0.499824	0.377261	3.78349e-05	-0.0967811	-0.0378135	0.729941	0.203403	0.455572	0.0771108	-0.185642	0.608984	0.0696899	-0.124738	0.274731	0.430093	-0.20011	0.326822	0.518818	-0.163391	0.174114	0.0749432	-0.353235	0.748572	0.839226	0.407369	0.387168	-0.235897	-0.180786	-0.163852	0.0987116	0.447449	0.727026	0.18148	0.636264	0.557129	0.359817
PARP3	-0.200618	-0.0731473	0.193984	0.328098	-0.255863	0.583344	0.758624	0.400808	0.450791	0.292071	-0.0634129	-0.066519	0.182714	0.391636	0.261132	-0.184904	0.0392579	-0.0555028	0.761151	0.274319	0.219208	0.0959914	-0.172774	0.639143	-0.0308087	-0.142881	0.0693688	0.286317	-0.179313	0.33825	0.592508	-0.364479	0.131109	0.0233138	-0.174243	0.55497	0.762202	0.183277	0.0803874	-0.097823	-0.0686023	-0.0602099	-0.0663171	0.134022	0.532093	0.365165	0.38916	0.39658	0.178702
SLC45A3	0.441085	0.421755	0.582215	0.330648	0.199716	0.524441	0.514069	0.195058	0.454625	0.788132	-0.181973	-0.120429	0.363857	0.300464	0.615223	-0.365536	0.598637	0.519462	0.85706	0.279666	-0.0716852	0.669641	0.476335	0.893887	0.53683	0.509524	0.25294	0.379831	0.468661	0.405793	0.743107	-0.360709	0.544108	0.516125	0.195105	0.583152	0.342273	-0.0418857	0.178837	0.359226	0.405197	0.233923	-0.187883	0.386543	0.34142	0.598849	0.472477	0.72488	-0.0492585
PHLDA1	-0.000569179	0.111479	0.302958	0.298708	-0.190904	0.527237	0.711021	0.323484	0.392104	0.37441	-0.103044	-0.0513575	0.218663	0.344659	0.459957	-0.126137	0.0562704	0.147973	0.868603	0.119354	0.254269	0.193891	-0.0112912	0.751909	0.0852484	-0.0209604	0.0912657	0.38332	-0.0852688	0.45136	0.708571	-0.409423	0.316016	0.0911188	-0.0903399	0.631038	0.738967	0.237862	0.198011	0.0178336	0.0418925	-0.136293	0.0011924	0.292486	0.588498	0.368814	0.461929	0.525182	0.15149
ADAMTSL3	-0.124359	0.24996	0.0464912	0.550609	-0.0121009	0.187833	0.53107	0.577129	0.106943	-0.103903	-0.0221037	0.216786	0.0865263	0.318143	0.411365	0.479085	-0.357221	0.121492	0.571238	-0.299799	0.515386	-0.11046	-0.0888224	0.368195	-0.193573	-0.236302	-0.135655	0.536968	-0.304463	0.584889	0.682437	-0.141129	0.36763	-0.204411	0.270321	0.376337	0.779404	0.483843	0.195005	0.154996	0.0331095	-0.328713	0.537703	0.100829	0.50721	0.203293	0.151816	0.121886	0.0817544
C5orf49	-0.153235	-0.0253633	0.0372973	0.372137	0.200755	0.394664	0.40691	0.632895	0.35564	-0.117611	0.0901039	0.217599	0.236829	0.30862	0.0588903	0.251344	-0.284459	-0.0478014	0.285409	0.0557992	0.337675	-0.0564619	-0.118484	0.0993692	-0.237071	-0.188599	0.0486307	0.364157	-0.341187	-0.0158043	0.331421	0.278404	0.103085	0.0503433	0.1188	0.351649	0.579088	0.155779	0.153547	0.180877	-0.0353936	0.15376	0.29372	-0.000370259	0.0770741	0.0558288	0.229958	0.0134312	0.224904
NOPCHAP1	-0.149705	0.0141989	0.24596	0.485838	-0.112717	0.602585	0.78218	0.460022	0.491087	0.416818	-0.0839982	-0.0803333	0.192828	0.440692	0.266396	-0.261088	0.248234	0.0134774	0.761102	0.379997	0.129389	0.227602	-0.0491731	0.689073	0.0746529	-0.00589221	0.059499	0.281357	-0.00247376	0.366085	0.645036	-0.36404	0.16282	0.118381	-0.0201851	0.479337	0.67326	0.112907	-0.0291532	0.0334283	0.0769301	0.0892717	-0.118579	0.0607104	0.44459	0.548709	0.304234	0.382466	0.0412437
C16orf96	0.0888507	0.211555	0.365223	0.285486	0.187477	0.501095	0.516506	0.53597	0.431212	0.0631797	0.338006	0.488346	0.434161	0.461903	0.451194	0.443269	-0.326111	0.183694	0.51442	-0.119854	0.659262	0.0598752	0.0275114	0.342517	0.0232652	-0.0402811	0.259383	0.644051	-0.227289	0.223341	0.507564	0.307889	0.356207	0.158928	0.0128809	0.67754	0.737637	0.51274	0.546663	0.14274	0.00162006	-0.0701298	0.500208	0.498018	0.462473	0.0272777	0.572606	0.374716	0.325128
PIM1	0.0236705	0.125951	0.353074	0.298171	-0.185084	0.544279	0.772446	0.257843	0.395344	0.433897	-0.0537337	-0.0323672	0.192483	0.354874	0.481727	-0.179128	0.0891102	0.174277	0.901015	0.114011	0.321261	0.201747	0.0222888	0.804233	0.11277	0.00637092	0.0673158	0.353875	-0.0540024	0.436016	0.717308	-0.418926	0.280435	0.109377	-0.136097	0.616647	0.696002	0.300552	0.167826	0.0479979	0.11591	-0.151063	-0.0534778	0.345086	0.5812	0.437097	0.459204	0.524864	0.0649838
STEAP4	0.0296991	0.138773	0.237041	0.381246	-0.0911912	0.41834	0.77777	0.206534	0.258866	0.389302	-0.214088	-0.179995	-0.00395905	0.19777	0.396275	-0.292169	0.0839798	0.222394	0.895666	0.0168972	0.294414	0.145614	0.0850715	0.787612	-0.0290034	-0.0211464	-0.182427	0.201843	-0.0996665	0.330818	0.741004	-0.477934	0.194053	0.0643337	-0.0227582	0.40273	0.534809	0.22904	-0.0893236	0.28221	0.324443	-0.11443	-0.18086	0.166755	0.303056	0.562895	0.227753	0.297213	-0.19473
FCN1	-0.215957	-0.141378	0.374798	0.113957	-0.142325	0.751829	0.586684	0.549451	0.685891	0.0985401	0.583623	0.559306	0.585935	0.6929	0.23684	0.3195	-0.23269	-0.209656	0.375151	0.317138	0.559202	0.0159795	-0.300602	0.256182	0.0932175	-0.15377	0.553994	0.573584	-0.240449	0.162295	0.244372	0.327171	0.114726	0.127972	-0.390446	0.811029	0.885327	0.474079	0.640889	-0.418673	-0.435218	-0.0182581	0.384509	0.510454	0.749522	-0.1008	0.763012	0.523372	0.655021
ABCA9	-0.0700637	0.339556	-0.015542	0.368767	0.13352	-0.163372	-0.0948269	0.50819	-0.0924751	-0.387884	0.316071	0.598046	0.208212	0.317007	0.290069	0.986949	-0.415777	0.0488677	-0.13911	-0.406826	0.425447	-0.16389	-0.0766374	-0.233423	-0.00944617	-0.126916	0.120896	0.602204	-0.0940662	0.576533	0.188439	0.318204	0.40324	-0.246952	0.422314	0.140263	0.448287	0.510903	0.458429	-0.0866505	-0.223802	-0.335635	0.96538	0.126504	0.498382	-0.234803	0.0400694	0.00318707	0.2766
SOCS3	0.0968853	0.131576	0.348241	0.124975	-0.206445	0.490151	0.648209	0.193581	0.342438	0.332928	-0.0434071	0.00655151	0.234546	0.273847	0.526862	-0.0611342	-0.0852682	0.209404	0.866324	-0.0324787	0.372248	0.148649	0.0109566	0.730956	0.0788215	-0.0301749	0.122359	0.402055	-0.152894	0.38628	0.662504	-0.342057	0.337789	0.100169	-0.195474	0.698117	0.710927	0.326274	0.33639	0.0147483	0.0314681	-0.239063	0.0414369	0.461231	0.601551	0.223416	0.563722	0.570464	0.205273
DHODH	0.430166	0.466672	0.539117	0.402799	0.249979	0.503264	0.619473	0.289345	0.400232	0.63502	-0.174353	-0.0402008	0.313499	0.279444	0.682441	-0.186936	0.319036	0.568291	0.957472	0.0385949	0.192678	0.522644	0.448733	0.899403	0.347144	0.369442	0.117633	0.475332	0.242057	0.408558	0.86784	-0.28985	0.574697	0.423747	0.233584	0.62656	0.485338	0.141781	0.21783	0.503039	0.470363	0.1039	-0.0290952	0.428627	0.325048	0.562651	0.473448	0.623594	-0.0795391
GP5	0.65453	0.762383	0.632535	0.386539	0.630418	0.257415	0.259208	0.344437	0.248616	0.368861	0.240541	0.512317	0.46714	0.329688	0.808275	0.477012	0.0403809	0.746487	0.541684	-0.354007	0.539348	0.453055	0.623386	0.496872	0.445452	0.480965	0.259674	0.751162	0.30637	0.401332	0.677452	0.311525	0.751466	0.454533	0.47753	0.558816	0.324433	0.470036	0.583792	0.640448	0.508794	0.0288352	0.557967	0.683327	0.28075	0.245662	0.479388	0.509379	-0.0242861
NOCT	-0.101262	-0.0298146	0.338388	0.337306	-0.113413	0.725095	0.73973	0.478997	0.61984	0.426469	0.0312097	0.0197512	0.366046	0.500752	0.293426	-0.210534	0.19407	-0.00232647	0.743548	0.439998	0.156665	0.267352	-0.071669	0.658318	0.138643	0.0180055	0.263039	0.370364	-0.0283582	0.277972	0.576588	-0.214546	0.200279	0.218654	-0.143835	0.665252	0.750195	0.110395	0.191003	-0.071233	-0.0582277	0.13694	-0.0673897	0.222325	0.523565	0.380827	0.526425	0.534361	0.268523
FKBP5	0.0618932	0.210837	0.268649	0.495581	-0.0187185	0.436264	0.653488	0.331162	0.336752	0.517216	-0.292509	-0.229755	0.118417	0.280233	0.395631	-0.325722	0.383945	0.239197	0.825641	0.245872	-0.0216002	0.360828	0.166623	0.785704	0.178812	0.15709	-0.0304898	0.256518	0.165773	0.465235	0.747642	-0.521203	0.326242	0.176268	0.176766	0.393165	0.500295	0.00567984	-0.092334	0.237112	0.275245	0.0773688	-0.170815	0.0494046	0.345385	0.635529	0.207033	0.414818	-0.120085
RGS1	-0.245349	-0.25707	0.182912	0.122907	-0.311036	0.668169	0.68876	0.328787	0.540739	0.273504	-0.000281404	-0.086591	0.242035	0.367875	0.110858	-0.301669	0.0256483	-0.18407	0.642858	0.421967	0.141992	0.0750588	-0.262228	0.528706	-0.049517	-0.172568	0.187047	0.183862	-0.235934	0.0975888	0.3906	-0.251948	-0.0119408	0.083617	-0.378031	0.590449	0.70333	0.0652374	0.12108	-0.23605	-0.208551	0.0478238	-0.197666	0.14961	0.45322	0.214936	0.485112	0.411139	0.323025
SYT7	0.125135	0.371429	0.592048	0.346134	0.109053	0.466512	0.641302	0.324372	0.391756	0.259129	0.712659	0.776502	0.413722	0.666274	0.629181	0.528649	-0.148998	0.234268	0.489794	-0.151005	0.932387	0.0956964	0.104565	0.458025	0.309384	0.100718	0.315597	0.684344	0.0606328	0.502066	0.496448	0.265897	0.336146	0.121915	-0.0914324	0.619218	0.636395	0.922274	0.596318	-0.00773215	0.101817	-0.294741	0.577229	0.765797	0.780291	0.225871	0.559924	0.472967	0.103874
RYR1	0.176682	0.190321	0.47961	0.072187	0.437621	0.457353	0.00387848	0.511491	0.542436	0.0272335	0.790076	0.87448	0.743707	0.603466	0.246137	0.667941	-0.118264	0.0700103	-0.168652	0.156278	0.45941	0.209818	0.0958937	-0.175362	0.36972	0.229697	0.732482	0.667605	0.128923	-0.0251298	-0.0554311	0.905337	0.29823	0.391814	0.0263721	0.570684	0.369261	0.377052	0.81373	-0.105927	-0.235062	0.263048	0.682469	0.58414	0.361214	-0.302757	0.64039	0.401995	0.58492
[truncated: 7 more columns]

## Sheet: MetaCorGene_liver.p
	23-Nordeoxycholic acid	L-Tryptophan	PC (18:0/20:4)	11(E)-Eicosenoic Acid	10-Hydroxydecanoic acid	PC (18:0/20:3)	SM (d14:1/20:0)	PC (16:0/16:1)	PC (18:0/22:4)	2-(3,4-dimethoxyphenyl)ethanamine	PC (16:0/18:1)	PC (16:1e/18:2)	PC (18:1e/18:2)	methadone-d9	(2R,3S,4S,5R,6R)-2-(hydroxymethyl)-6-(propan-2-yloxy)oxane-3,4,5-triol	PC (16:1e/19:2)	ACar 15:1	Biliverdin	Bicyclo prostaglandin E2	2-(2-amino-3-methylbutanamido)-3-phenylpropanoic acid	PC (17:0/18:2)	ACar 20:1	Palmitoylcarnitine	cis-gondoic acid	ACar 20:0	ACar 18:0	16-Heptadecyne-1,2,4-triol	5-OxoETE	ACar 18:1	PC (18:1e/14:1)	9-Oxo-ODE	PC (18:3e/20:2)	PC (20:0/20:3)	Prostaglandin E2	2-[(3S)-1-(2-Methylbenzyl)-3-pyrrolidinyl]-1H-imidazo[4,5-b]pyridine	4,6,8-trihydroxy-7-methoxy-3-methyl-3,4-dihydro-1H-2-benzopyran-1-one	PC (14:1e/19:2)	PC (18:3e/15:0)	Radicinin	PC (14:0e/18:0)	PC (18:1e/16:2)	ACar 13:0	PC (19:1/18:2)	PC (18:5e/4:0)	PC (20:5e/15:1)	DL-Dipalmitoylphosphatidylcholine	2-(2,4-dihydroxyphenyl)-3,5,7-trihydroxy-4H-chromen-4-one	4-morpholino-3-nitrobenzene-1-sulfonamide	PC (18:4e/17:1)
SLC22A2	0.000120579	0.0103104	0.0570709	0.694955	0.0620653	0.866029	0.936278	0.704621	0.817387	0.0247157	0.79696	0.924212	0.458323	0.998556	0.0348744	0.713848	0.0739955	0.000246839	0.23707	0.74189	0.852	0.0147324	7.97587e-05	0.0982836	0.0243971	0.0029978	0.610852	0.409848	0.0145155	0.553072	0.180503	0.955548	0.0442762	0.0491465	0.175173	0.531763	0.444695	0.92006	0.552151	0.017443	0.0156042	0.489243	0.912583	0.152114	0.82561	0.238814	0.512956	0.133884	0.377286
C7orf57	0.822021	0.487673	0.465959	0.913699	0.51559	0.0355218	0.82084	0.141382	0.0155427	0.788939	0.182832	0.275133	0.0403087	0.164423	0.653821	0.882614	0.806595	0.512072	0.691562	0.0390308	0.969201	0.550155	0.746286	0.663533	0.62235	0.78132	0.0277203	0.437175	0.980588	0.258808	0.574641	0.0247107	0.911179	0.218032	0.579099	0.15301	0.383324	0.67225	0.211389	0.520279	0.295309	0.0646337	0.785427	0.618217	0.86187	0.542	0.0883269	0.395477	0.0422731
SLCO4A1	0.440727	0.397243	0.135087	0.370264	0.767432	0.100013	0.0448411	0.507473	0.200525	0.058602	0.898669	0.998641	0.391968	0.34092	0.0953053	0.532105	0.366642	0.278112	0.000221314	0.639145	0.607574	0.198706	0.408468	0.00107948	0.349779	0.418943	0.631002	0.269003	0.555111	0.325974	0.0157686	0.464637	0.241202	0.306945	0.885826	0.064067	0.162122	0.661342	0.585007	0.443665	0.382392	0.805928	0.818247	0.246853	0.265766	0.131702	0.163164	0.0625329	0.969355
SLC5A8	0.0101947	0.032755	0.126005	0.461314	0.10658	0.717461	0.626036	0.926891	0.772694	0.0355095	0.475187	0.758076	0.646486	0.950719	0.0487434	0.504392	0.139668	0.00193907	0.0514568	0.73099	0.932216	0.0430332	0.00447958	0.0254177	0.153163	0.0407518	0.967279	0.467228	0.111991	0.55067	0.0455737	0.640144	0.0726775	0.102621	0.176236	0.497625	0.749124	0.883001	0.85916	0.00234177	0.00564646	0.525817	0.721751	0.314018	0.744851	0.107608	0.607174	0.217862	0.277391
SDS	0.0103218	0.0264099	0.0710536	0.435324	0.139159	0.586989	0.497846	0.951456	0.654826	0.0141125	0.597002	0.86813	0.54682	0.878492	0.023218	0.51947	0.107304	0.00180299	0.0255665	0.812033	0.968568	0.0286821	0.00497533	0.00762465	0.0937262	0.0308845	0.836232	0.376832	0.0814674	0.421854	0.0278616	0.601998	0.0554156	0.088772	0.226037	0.368339	0.889116	0.974369	0.735649	0.0101957	0.00932084	0.576829	0.763067	0.209253	0.998512	0.0825128	0.470572	0.122833	0.323486
POU2AF2	0.0193245	0.18872	0.0349124	0.812266	0.0124049	0.238163	0.807899	0.655181	0.140207	0.0265815	0.714937	0.607651	0.0506543	0.50737	0.301226	0.635729	0.0214258	0.0876397	0.674807	0.267662	0.483944	0.000869179	0.0175909	0.406879	0.00835104	0.00108582	0.0684913	0.332043	0.0129645	0.719232	0.623842	0.241305	0.150276	3.79639e-05	0.34292	0.258239	0.613175	0.407081	0.295128	0.160521	0.263559	0.0129217	0.868607	0.225678	0.657355	0.532304	0.168519	0.0710059	0.808023
SNCA	0.8307	0.673891	0.269827	0.233606	0.778033	0.0528882	0.0177474	0.226019	0.123948	0.173516	0.996719	0.913733	0.402196	0.234776	0.282751	0.61452	0.533245	0.584238	0.0066191	0.450843	0.543905	0.363372	0.708882	0.022855	0.636251	0.699686	0.689702	0.293835	0.860346	0.484126	0.0372452	0.672873	0.450145	0.425048	0.923803	0.091086	0.0743619	0.68697	0.735474	0.548222	0.565839	0.650811	0.891648	0.493082	0.345025	0.152309	0.229916	0.192159	0.910731
FABP4	0.62836	0.86742	0.676685	0.475306	0.470276	0.167525	0.0245436	0.40453	0.336786	0.541672	0.882342	0.876151	0.760219	0.389445	0.499326	0.701529	0.931458	0.909626	0.0218415	0.663595	0.484062	0.933168	0.651094	0.0829695	0.857798	0.654313	0.974628	0.515679	0.576115	0.392111	0.115155	0.330364	0.784467	0.939999	0.614759	0.165724	0.0273948	0.54764	0.8533	0.816346	0.893186	0.717592	0.895841	0.700047	0.158579	0.400004	0.360726	0.367007	0.729463
BCL6	0.64135	0.993458	0.574977	0.309544	0.601385	0.134635	0.00765381	0.300465	0.286163	0.498037	0.936274	0.91319	0.704774	0.266164	0.42477	0.837251	0.96257	0.971441	0.0172637	0.675206	0.32447	0.899211	0.72039	0.0678875	0.92415	0.710327	0.965198	0.403447	0.644913	0.320289	0.0766554	0.428263	0.738472	0.976871	0.717645	0.15773	0.017597	0.382946	0.829378	0.922289	0.983349	0.737812	0.95501	0.633202	0.130334	0.290602	0.363407	0.376247	0.829936
GADD45B	0.907343	0.799744	0.41989	0.340728	0.745787	0.114256	0.0217772	0.277891	0.237706	0.375275	0.983517	0.881694	0.509626	0.256694	0.26421	0.899968	0.916981	0.793862	0.00741718	0.688948	0.40527	0.659575	0.933916	0.0397367	0.839716	0.939442	0.757744	0.265418	0.825827	0.259876	0.044974	0.466158	0.469988	0.806561	0.857942	0.0750144	0.0151438	0.453749	0.593621	0.974523	0.94232	0.82651	0.856654	0.466443	0.101113	0.328576	0.223602	0.195889	0.687165
EPHA5	0.124373	0.619491	0.135489	0.793508	0.042155	0.20833	0.737304	0.710432	0.127814	0.195983	0.532141	0.563466	0.0797586	0.624791	0.748414	0.627681	0.21266	0.356249	0.94564	0.244668	0.641659	0.0698731	0.159308	0.860323	0.140811	0.0687223	0.083706	0.568024	0.209201	0.193732	0.864741	0.0631473	0.533601	0.0048011	0.787014	0.321342	0.595077	0.385706	0.322251	0.329347	0.546445	0.0100798	0.754921	0.312815	0.390056	0.988472	0.166138	0.253265	0.573453
ASPHD2	0.212161	0.121689	0.172102	0.256626	0.493673	0.398951	0.0994421	0.676597	0.576434	0.102253	0.680902	0.97154	0.675769	0.620232	0.028241	0.766832	0.50016	0.0658816	7.62183e-05	0.691022	0.439505	0.238553	0.172643	0.000997679	0.419633	0.349413	0.922367	0.263012	0.518176	0.21233	0.00116805	0.400608	0.122808	0.39757	0.454237	0.209666	0.354317	0.489271	0.738191	0.0941037	0.0889397	0.927137	0.976919	0.257719	0.481445	0.0834809	0.412693	0.181461	0.476972
KBTBD12	0.560519	0.839859	0.630444	0.40231	0.505868	0.116641	0.0159045	0.304411	0.250714	0.529363	0.956308	0.978263	0.66229	0.272511	0.528987	0.768173	0.975677	0.831248	0.0322251	0.540619	0.441967	0.913053	0.610714	0.0983345	0.908574	0.664403	0.866663	0.4545	0.611937	0.386026	0.128444	0.430673	0.811727	0.97409	0.610903	0.145442	0.0163354	0.500516	0.806253	0.743174	0.829135	0.798322	0.973306	0.691141	0.12574	0.38124	0.327227	0.353431	0.667694
MPO	0.595875	0.24907	0.451574	0.536527	0.307673	0.926995	0.801241	0.265967	0.762315	0.738589	0.136742	0.014461	0.243871	0.292813	0.30628	0.000680232	0.549615	0.560711	0.737192	0.472903	0.184599	0.846168	0.673161	0.686666	0.511112	0.688972	0.331757	0.0506752	0.761229	0.371425	0.748586	0.087922	0.227516	0.792506	0.37894	0.435989	0.448196	0.165515	0.0608884	0.885799	0.871067	0.822672	0.000992273	0.252204	0.30526	0.586182	0.454301	0.603659	0.453615
RSPH14	0.000621286	0.0148741	0.0239346	0.584504	0.00577226	0.626646	0.838617	0.945152	0.492402	0.026521	0.731097	0.495049	0.1947	0.644685	0.0771488	0.955405	0.040279	0.00439599	0.525589	0.894186	0.884674	0.00398191	7.63142e-05	0.261348	0.00409007	5.09107e-05	0.282677	0.270537	0.00201416	0.74809	0.347523	0.443618	0.0559705	0.00881756	0.140771	0.467291	0.4466	0.913046	0.368949	0.0331015	0.0433717	0.192773	0.841382	0.13131	0.782745	0.308688	0.389737	0.126081	0.588688
FHIT	0.978623	0.695648	0.679559	0.450544	0.652233	0.431139	0.432022	0.40262	0.283849	0.621978	0.159258	0.148297	0.0852597	0.442158	0.805395	0.227347	0.571085	0.627929	0.277491	0.527915	0.877105	0.901224	0.716233	0.23403	0.713859	0.934548	0.0382301	0.364195	0.847552	0.416368	0.306231	0.00893141	0.85547	0.50369	0.659504	0.265932	0.591249	0.943645	0.0402509	0.352944	0.13779	0.447586	0.256242	0.431284	0.713563	0.0690022	0.137095	0.508922	0.0100977
TBATA	0.811064	0.340793	0.573937	0.0935697	0.696283	0.448549	0.0865669	0.184343	0.602191	0.581438	0.725484	0.867498	0.759766	0.45794	0.174787	0.686138	0.951906	0.3991	0.0193341	0.701182	0.350957	0.681705	0.667728	0.0842517	0.988935	0.944426	0.767492	0.199078	0.895413	0.159187	0.00700283	0.553783	0.245249	0.897759	0.374031	0.296672	0.0769661	0.417774	0.826895	0.294969	0.424873	0.79284	0.497641	0.713548	0.369212	0.219189	0.642503	0.521064	0.79871
ADRB3	0.852817	0.841703	0.408338	0.246623	0.922663	0.0638642	0.0233672	0.137041	0.137301	0.366484	0.911522	0.799784	0.383872	0.173919	0.343882	0.920116	0.802743	0.866726	0.0200165	0.473317	0.491541	0.571965	0.93504	0.0672248	0.79961	0.998734	0.62888	0.225915	0.891116	0.332183	0.0583292	0.659902	0.479945	0.682489	0.972708	0.0689241	0.0113693	0.572901	0.593188	0.947387	0.986931	0.886609	0.815954	0.564138	0.14274	0.311183	0.212297	0.206713	0.595449
C11orf96	0.167301	0.156243	0.0484526	0.433251	0.474162	0.132616	0.124341	0.488566	0.218253	0.0613049	0.914866	0.661544	0.213774	0.326558	0.0131527	0.954964	0.479423	0.0914303	0.000565153	0.970703	0.422044	0.125021	0.204289	0.0023859	0.20053	0.249384	0.430365	0.0881337	0.444355	0.261938	0.00825499	0.777462	0.0630898	0.186314	0.678504	0.0180976	0.167075	0.485225	0.2241	0.288666	0.312356	0.860548	0.754955	0.0616685	0.21435	0.256787	0.0635108	0.0172098	0.876686
LRRTM3	0.536836	0.886081	0.386008	0.134773	0.920494	0.0489556	0.0165254	0.0324497	0.0893645	0.610966	0.284648	0.215638	0.251391	0.0193708	0.402762	0.449201	0.951116	0.811997	0.143128	0.448647	0.160847	0.812102	0.65439	0.244958	0.780789	0.82511	0.425274	0.0889244	0.837353	0.210732	0.143158	0.833855	0.582882	0.884198	0.921217	0.0683594	0.000198595	0.177118	0.359599	0.652025	0.675351	0.962442	0.2918	0.463717	0.0210074	0.441351	0.195506	0.281143	0.415653
SOD3	0.964192	0.391036	0.329467	0.0319228	0.617589	0.140903	0.0334124	0.0204837	0.196661	0.512897	0.554074	0.277862	0.305189	0.0600321	0.174773	0.350121	0.93261	0.636045	0.0621921	0.816913	0.180546	0.581213	0.843069	0.138272	0.682142	0.873805	0.644541	0.0394665	0.930975	0.102056	0.0202514	0.918011	0.242242	0.74178	0.465317	0.108882	0.00531541	0.202947	0.427944	0.658759	0.770425	0.993605	0.194519	0.485073	0.0869275	0.248437	0.324222	0.308012	0.75765
MKX	0.732498	0.252681	0.384568	0.403607	0.991615	0.600796	0.315351	0.309055	0.703168	0.887826	0.524163	0.202661	0.412705	0.274907	0.0471691	0.0620243	0.465319	0.458181	0.14024	0.346366	0.0779535	0.891707	0.870788	0.2758	0.686565	0.989084	0.634013	0.0270964	0.876589	0.0300479	0.0770237	0.967575	0.113191	0.911173	0.683475	0.0955774	0.0238389	0.051266	0.0931297	0.987711	0.937808	0.249926	0.0346556	0.14247	0.00887864	0.914337	0.233737	0.216959	0.518123
CCL24	0.761816	0.811537	0.52962	0.231818	0.814315	0.152566	0.0129425	0.191349	0.295395	0.579392	0.875793	0.726315	0.607438	0.238412	0.316908	0.85666	0.821171	0.872234	0.0177552	0.866019	0.222982	0.880911	0.832361	0.0849697	0.9288	0.75321	0.935048	0.245008	0.626516	0.27076	0.0457513	0.605876	0.553518	0.980976	0.93815	0.124219	0.0085526	0.297517	0.663733	0.890105	0.910084	0.73287	0.660111	0.552519	0.131034	0.337331	0.329774	0.375744	0.785991
SIX1	0.624733	0.4763	0.467083	0.196318	0.673864	0.297863	0.109553	0.412882	0.425745	0.167351	0.393458	0.54987	0.762556	0.630923	0.299932	0.394958	0.338786	0.357868	0.00931713	0.669396	0.952327	0.291194	0.44969	0.0207596	0.677328	0.55859	0.872874	0.533691	0.658983	0.411922	0.0221659	0.301627	0.355955	0.485649	0.487397	0.362253	0.325642	0.883396	0.793467	0.236231	0.273896	0.642965	0.641544	0.891034	0.741898	0.0758015	0.645964	0.360639	0.633526
FICD	0.6028	0.354011	0.361206	0.324456	0.123583	0.380869	0.831255	0.0409121	0.281703	0.995838	0.245003	0.0505726	0.0977061	0.181304	0.392621	0.047464	0.770173	0.561313	0.914517	0.985396	0.316806	0.560382	0.60675	0.936086	0.561858	0.600147	0.235892	0.0319314	0.828492	0.696935	0.510019	0.0419508	0.221017	0.41324	0.314259	0.209858	0.24151	0.458507	0.0939752	0.563813	0.995105	0.520264	0.0287494	0.370513	0.558441	0.837927	0.26718	0.487831	0.335317
S100A9	0.770084	0.949259	0.60651	0.539272	0.453015	0.247675	0.0260125	0.530738	0.468826	0.59076	0.962005	0.987154	0.809156	0.437647	0.317462	0.919825	0.722432	0.913915	0.0107547	0.974407	0.26739	0.983315	0.726982	0.0630218	0.864487	0.642773	0.957803	0.421796	0.528401	0.281757	0.0791259	0.319084	0.65789	0.857394	0.604323	0.14024	0.0242136	0.310316	0.690415	0.881288	0.982016	0.445329	0.910708	0.473791	0.0966861	0.461501	0.322064	0.334114	0.790754
ADAM22	0.108128	0.120741	0.000620869	0.221895	0.0147748	0.0296733	0.339071	0.201481	0.0148166	0.00789746	0.160283	0.106544	0.0108218	0.0390012	0.116581	0.914835	0.0380814	0.134904	0.320674	0.203095	0.62	0.00407322	0.0532097	0.156552	0.00317939	0.00831436	0.0415941	0.0578888	0.0193582	0.713843	0.236344	0.154539	0.132733	0.00171421	0.390912	0.0761632	0.630712	0.693738	0.174628	0.238824	0.245072	0.0594302	0.625414	0.0698916	0.578637	0.177735	0.068907	0.0312122	0.870386
SGK1	0.766599	0.907053	0.389035	0.701386	0.508933	0.0717752	0.0331392	0.403171	0.176703	0.493226	0.601474	0.643149	0.400491	0.207217	0.356887	0.999929	0.819665	0.929167	0.0398051	0.629008	0.256634	0.855989	0.659837	0.109056	0.869754	0.768531	0.510212	0.287505	0.63469	0.429446	0.187684	0.699051	0.680074	0.860007	0.390715	0.0326194	0.00917694	0.316479	0.343343	0.573828	0.66834	0.698231	0.816114	0.266288	0.0410089	0.667123	0.0898761	0.151415	0.381312
PARP3	0.633812	0.863337	0.645301	0.427539	0.540783	0.129032	0.0291006	0.325092	0.262294	0.482714	0.881419	0.875644	0.66496	0.337314	0.532181	0.661126	0.926467	0.896146	0.0282542	0.510873	0.601961	0.821119	0.682438	0.0879757	0.94227	0.735722	0.87035	0.491774	0.670925	0.412497	0.121675	0.374714	0.756972	0.956302	0.679847	0.153348	0.027907	0.663974	0.849922	0.817749	0.871774	0.887379	0.876019	0.751701	0.174641	0.373747	0.340648	0.330699	0.671999
SLC45A3	0.273974	0.297982	0.129955	0.423739	0.635372	0.182098	0.192472	0.643437	0.25775	0.020158	0.666258	0.776369	0.375592	0.469618	0.104482	0.373225	0.11689	0.187039	0.00654101	0.502327	0.86605	0.0692786	0.232774	0.00275441	0.170109	0.197114	0.545578	0.35335	0.241455	0.318539	0.0346372	0.380047	0.16327	0.190391	0.643355	0.129189	0.406599	0.921556	0.671761	0.382153	0.319319	0.577132	0.655921	0.34419	0.407846	0.116726	0.237117	0.0419091	0.90779
PHLDA1	0.998933	0.792701	0.465755	0.472346	0.650657	0.179354	0.0480106	0.434452	0.336685	0.360829	0.808155	0.903874	0.602888	0.403118	0.251496	0.765989	0.894716	0.726574	0.0051273	0.778327	0.543395	0.645464	0.978831	0.031424	0.840932	0.960711	0.829825	0.348576	0.840894	0.261618	0.0491416	0.313806	0.445737	0.830095	0.831532	0.0933861	0.0362149	0.570545	0.638319	0.966569	0.921543	0.747598	0.997764	0.482063	0.124864	0.368624	0.249203	0.181368	0.720273
ADAMTSL3	0.769219	0.55048	0.912954	0.15729	0.977313	0.65601	0.175628	0.134159	0.801006	0.806579	0.958569	0.606082	0.838571	0.44251	0.311288	0.229702	0.385009	0.774433	0.139122	0.47065	0.191138	0.794567	0.834332	0.369492	0.646016	0.573151	0.74875	0.169977	0.46343	0.127774	0.0622051	0.738876	0.370282	0.627272	0.517299	0.358163	0.0225928	0.224437	0.64353	0.714004	0.937965	0.426622	0.16928	0.812223	0.1995	0.629197	0.719689	0.773716	0.847392
C5orf49	0.717151	0.952464	0.930132	0.363986	0.633575	0.333255	0.317079	0.0921296	0.387269	0.781504	0.831967	0.604698	0.57227	0.457031	0.889836	0.548202	0.494713	0.910509	0.493209	0.895593	0.413342	0.894359	0.779912	0.814906	0.571867	0.654672	0.908961	0.375168	0.408188	0.970372	0.42259	0.504338	0.808081	0.905766	0.779338	0.392997	0.132531	0.712606	0.716593	0.66818	0.933692	0.716211	0.48013	0.999306	0.856057	0.895538	0.583788	0.974819	0.59231
NOPCHAP1	0.72347	0.973381	0.557088	0.222249	0.79044	0.113864	0.0217996	0.251421	0.216543	0.30427	0.843243	0.850022	0.64731	0.274452	0.523637	0.532251	0.553327	0.974733	0.0282705	0.353122	0.76009	0.587755	0.907949	0.0587131	0.860545	0.988952	0.888702	0.499635	0.995362	0.372452	0.0841589	0.375332	0.700064	0.7801	0.962163	0.229422	0.0672322	0.790091	0.945369	0.937369	0.856324	0.833503	0.77974	0.886447	0.269728	0.159026	0.463784	0.349742	0.922756
C16orf96	0.83428	0.61501	0.373665	0.493087	0.65663	0.205878	0.190007	0.170927	0.286113	0.881853	0.412854	0.219513	0.282461	0.249234	0.261815	0.271325	0.430511	0.663243	0.192116	0.777417	0.075349	0.888002	0.948442	0.406242	0.956393	0.924555	0.535031	0.08479	0.588283	0.594952	0.199134	0.458154	0.386457	0.70699	0.975851	0.0648587	0.0367309	0.193824	0.160905	0.735976	0.996962	0.868937	0.206812	0.209127	0.248573	0.94888	0.137961	0.360406	0.431983
PIM1	0.955634	0.766327	0.390947	0.473182	0.660811	0.163112	0.0246587	0.537544	0.332347	0.282787	0.899443	0.939354	0.647909	0.388364	0.226771	0.67125	0.833801	0.679786	0.0022482	0.788075	0.437799	0.631863	0.958222	0.0161107	0.790343	0.988055	0.874164	0.389796	0.898942	0.280174	0.0451807	0.301577	0.501103	0.796548	0.747951	0.103453	0.0551948	0.469483	0.691184	0.910142	0.784607	0.721037	0.89992	0.402496	0.130788	0.278847	0.252375	0.181681	0.878498
STEAP4	0.944347	0.743122	0.571916	0.35141	0.829962	0.302324	0.023068	0.623621	0.535874	0.340457	0.610682	0.669728	0.992577	0.638736	0.331105	0.48256	0.843277	0.596557	0.00262177	0.968324	0.479043	0.730809	0.841259	0.0202981	0.945649	0.960362	0.665463	0.631698	0.814359	0.423486	0.0354333	0.230985	0.645182	0.879707	0.957343	0.322558	0.172035	0.585332	0.833407	0.49828	0.433011	0.787309	0.66821	0.693082	0.465604	0.146323	0.5875	0.474674	0.644007
FCN1	0.607494	0.738427	0.360292	0.788174	0.736723	0.0314521	0.126322	0.158347	0.0603726	0.81643	0.128804	0.149482	0.126927	0.0567538	0.572252	0.440457	0.5792	0.618263	0.359804	0.444034	0.149573	0.970043	0.469404	0.54026	0.826227	0.716195	0.154225	0.137133	0.566234	0.700998	0.559717	0.428924	0.786769	0.762659	0.338915	0.0145697	0.00345304	0.235308	0.086835	0.301899	0.281157	0.965774	0.346955	0.196159	0.0322762	0.812277	0.0276412	0.183153	0.0779161
ABCA9	0.86906	0.410577	0.970863	0.368689	0.75261	0.699084	0.823262	0.198488	0.827595	0.342373	0.445653	0.117346	0.620738	0.444233	0.485859	5.50309e-06	0.305603	0.908519	0.742515	0.317188	0.29332	0.698164	0.856867	0.57797	0.982289	0.764575	0.775519	0.114154	0.824664	0.134657	0.654952	0.442419	0.321886	0.555446	0.297273	0.740436	0.265283	0.195699	0.253281	0.838342	0.594173	0.416349	0.000101062	0.765323	0.208741	0.575658	0.92495	0.994024	0.50722
SOCS3	0.819474	0.756128	0.397918	0.7681	0.623774	0.217555	0.0821451	0.646001	0.406357	0.420354	0.918714	0.987716	0.576089	0.511629	0.179721	0.885659	0.840895	0.618694	0.00538907	0.939145	0.363833	0.725362	0.979458	0.0393913	0.852821	0.943456	0.772856	0.323446	0.71776	0.344547	0.0734206	0.406915	0.413174	0.813436	0.642715	0.0541469	0.0480539	0.430266	0.415235	0.972351	0.941036	0.568542	0.922395	0.250013	0.114652	0.594826	0.145599	0.139781	0.625788
DHODH	0.287414	0.243731	0.167943	0.322467	0.55045	0.203603	0.10143	0.486998	0.325854	0.0907048	0.679652	0.924705	0.449568	0.502681	0.062203	0.657576	0.44116	0.141643	0.00018621	0.927706	0.64757	0.183873	0.264749	0.00235687	0.399507	0.367746	0.781465	0.233899	0.56356	0.314931	0.00521397	0.486203	0.136196	0.295462	0.577701	0.0964553	0.222796	0.737702	0.604305	0.203839	0.239515	0.806585	0.945477	0.289333	0.432104	0.146536	0.236021	0.0985196	0.851492
GP5	0.0782165	0.0278475	0.092373	0.344195	0.0938075	0.538244	0.535315	0.403442	0.552698	0.368559	0.566081	0.194255	0.243195	0.425168	0.0151824	0.232016	0.924368	0.0333804	0.165531	0.389608	0.167725	0.259606	0.0986653	0.210344	0.268688	0.227615	0.534556	0.0316892	0.46049	0.3244	0.064907	0.452582	0.031581	0.257859	0.231436	0.149916	0.433027	0.239888	0.128666	0.0871222	0.197865	0.945964	0.150669	0.06173	0.500601	0.55758	0.229365	0.197263	0.954481
NOCT	0.811428	0.944131	0.412294	0.413885	0.789167	0.0418185	0.0359211	0.229801	0.101169	0.292036	0.94152	0.962976	0.372508	0.206239	0.480591	0.616758	0.645152	0.995638	0.0344714	0.275299	0.711023	0.522089	0.86608	0.0759158	0.743356	0.966247	0.529079	0.366458	0.946857	0.505029	0.13461	0.609901	0.634399	0.602903	0.734006	0.0718089	0.0320346	0.794685	0.650483	0.866889	0.89107	0.74643	0.874026	0.596673	0.182962	0.351984	0.180148	0.172463	0.520198
FKBP5	0.884246	0.616239	0.519995	0.21172	0.964911	0.27987	0.0788565	0.422974	0.414701	0.189292	0.482028	0.584129	0.780034	0.501424	0.331965	0.431094	0.347723	0.56832	0.0115793	0.557233	0.959512	0.379878	0.693317	0.0208179	0.671806	0.710265	0.942867	0.539711	0.694822	0.245382	0.0329577	0.185304	0.430315	0.676279	0.675404	0.335262	0.20672	0.989351	0.827855	0.571798	0.50939	0.855511	0.685897	0.907517	0.402062	0.0903655	0.622762	0.306835	0.776995
RGS1	0.558099	0.538809	0.664613	0.77186	0.453329	0.0701216	0.0588754	0.426511	0.166417	0.512181	0.999472	0.838452	0.563595	0.36994	0.793838	0.46775	0.951931	0.662585	0.0855582	0.297712	0.737322	0.859792	0.530397	0.177921	0.907307	0.682801	0.657381	0.662949	0.573766	0.818179	0.338707	0.547209	0.977613	0.843947	0.355826	0.123307	0.0516147	0.878026	0.775184	0.573572	0.620157	0.910467	0.638918	0.72364	0.259411	0.609235	0.223044	0.311581	0.435142
SYT7	0.76781	0.364972	0.122039	0.400972	0.797141	0.243915	0.086566	0.433118	0.337152	0.535444	0.0472633	0.0234408	0.308245	0.0712152	0.0946517	0.177977	0.724736	0.576553	0.217942	0.72114	0.000734076	0.821662	0.805365	0.253753	0.45586	0.812426	0.446374	0.0611895	0.886592	0.204859	0.210796	0.524443	0.415595	0.773665	0.829517	0.101611	0.0897893	0.00110655	0.118687	0.985503	0.810408	0.478533	0.134075	0.0267388	0.0223373	0.590677	0.148935	0.236564	0.806633
RYR1	0.675552	0.651671	0.229118	0.865119	0.278204	0.254541	0.992728	0.195098	0.164828	0.948962	0.0196391	0.00449023	0.0344119	0.113196	0.556794	0.0702523	0.780314	0.869159	0.689722	0.711715	0.252135	0.617985	0.821298	0.677875	0.367358	0.584228	0.0387735	0.0704456	0.760934	0.952901	0.896279	0.001973	0.47309	0.337075	0.950575	0.139594	0.367999	0.357176	0.0139842	0.802868	0.575225	0.529065	0.0621879	0.128383	0.379329	0.466066	0.0871597	0.323526	0.12775
[truncated: 7 more columns]

## Sheet: GeneCorMet_abdominal
	23-Nordeoxycholic acid	L-Tryptophan	PC (18:0/20:4)	11(E)-Eicosenoic Acid	10-Hydroxydecanoic acid	PC (18:0/20:3)	SM (d14:1/20:0)	PC (16:0/16:1)	PC (18:0/22:4)	2-(3,4-dimethoxyphenyl)ethanamine	PC (16:0/18:1)	PC (16:1e/18:2)	PC (18:1e/18:2)	methadone-d9	(2R,3S,4S,5R,6R)-2-(hydroxymethyl)-6-(propan-2-yloxy)oxane-3,4,5-triol	PC (16:1e/19:2)	ACar 15:1	Biliverdin	Bicyclo prostaglandin E2	2-(2-amino-3-methylbutanamido)-3-phenylpropanoic acid	PC (17:0/18:2)	ACar 20:1	Palmitoylcarnitine	cis-gondoic acid	ACar 20:0	ACar 18:0	16-Heptadecyne-1,2,4-triol	5-OxoETE	ACar 18:1	PC (18:1e/14:1)	9-Oxo-ODE	PC (18:3e/20:2)	PC (20:0/20:3)	Prostaglandin E2	2-[(3S)-1-(2-Methylbenzyl)-3-pyrrolidinyl]-1H-imidazo[4,5-b]pyridine	4,6,8-trihydroxy-7-methoxy-3-methyl-3,4-dihydro-1H-2-benzopyran-1-one	PC (14:1e/19:2)	PC (18:3e/15:0)	Radicinin	PC (14:0e/18:0)	PC (18:1e/16:2)	ACar 13:0	PC (19:1/18:2)	PC (18:5e/4:0)	PC (20:5e/15:1)	DL-Dipalmitoylphosphatidylcholine	2-(2,4-dihydroxyphenyl)-3,5,7-trihydroxy-4H-chromen-4-one	4-morpholino-3-nitrobenzene-1-sulfonamide	PC (18:4e/17:1)
APOF	-0.301261	-0.237409	-0.41127	-0.0798454	-0.21626	-0.296484	-0.526275	0.074551	-0.173673	-0.281467	-0.248241	-0.237518	-0.0631721	-0.125697	-0.399313	0.0490571	0.133583	-0.364976	-0.529783	0.261645	-0.678349	-0.0673111	-0.270264	-0.473161	-0.048138	-0.108199	0.0734832	-0.192938	0.0764172	0.0623527	-0.390383	-0.111268	-0.0909197	-0.214283	0.157929	-0.31863	-0.154189	-0.503704	-0.15019	-0.434061	-0.476666	0.107518	0.0331145	-0.538278	-0.0413466	-0.289325	-0.307296	-0.173746	0.273895
COL28A1	-0.0280525	0.428931	0.201584	0.610234	0.215267	0.158121	0.172383	0.76255	0.217584	-0.0852904	0.321929	0.616047	0.431659	0.581624	0.449352	0.868391	-0.128173	0.127673	0.150245	-0.116013	0.367435	0.108122	0.0207715	0.0733951	0.204195	0.0432339	0.301299	0.795819	0.0951333	0.745587	0.459966	0.24847	0.573165	-0.0384065	0.508913	0.398029	0.689284	0.469934	0.522267	-0.0412803	-0.167649	-0.137458	0.932073	0.196603	0.688108	0.0313997	0.240519	0.284952	0.34481
CXCL13	-0.0562812	-0.32735	0.244311	-0.283723	0.208712	0.571211	-0.143306	0.363724	0.66054	-0.00138972	0.563748	0.455304	0.683185	0.405188	-0.24935	0.125047	0.00847576	-0.30158	-0.375725	0.618081	-0.0527055	0.168489	-0.162519	-0.368258	0.203216	0.0999064	0.787426	0.231146	-0.00517658	-0.544946	-0.45201	0.834532	-0.100792	0.436761	-0.32484	0.464756	0.182729	-0.193178	0.56278	-0.378265	-0.518592	0.585826	0.133026	0.254301	0.0268409	-0.475992	0.612313	0.302385	0.776632
FGD2	0.872155	0.852561	0.77383	0.434536	0.812096	0.281668	0.0813862	0.181903	0.344408	0.855955	0.0175634	0.193245	0.509954	0.282299	0.730959	-0.0734839	0.834331	0.885514	0.464966	0.13685	-0.12136	0.945131	0.957038	0.635277	0.890846	0.966471	0.389236	0.514987	0.937864	0.346857	0.600593	0.114878	0.785008	0.813501	0.676407	0.361214	-0.138001	-0.0666466	0.294344	0.763008	0.743852	0.508348	0.0806387	0.491444	0.0162257	0.598798	0.337036	0.656896	-0.252544
TMIGD3	0.879885	0.926647	0.769502	0.449479	0.715741	0.243852	0.14545	0.202066	0.276944	0.794747	-0.0228511	0.215293	0.492217	0.277944	0.882881	0.0729824	0.669086	0.942337	0.617165	-0.0550826	0.0181041	0.875041	0.923492	0.729643	0.834942	0.8806	0.340705	0.633742	0.827449	0.532596	0.753231	0.00577508	0.905138	0.707977	0.684298	0.46712	0.038	0.0861625	0.40089	0.746348	0.712411	0.292649	0.227743	0.582656	0.201455	0.556355	0.397339	0.722066	-0.202839
SLC8A3	-0.203017	0.216917	-0.0491985	0.445097	0.121601	-0.0253745	-0.078783	0.687204	0.0714007	-0.357946	0.305443	0.562442	0.309514	0.433421	0.15706	0.909551	-0.277899	-0.100326	-0.196957	-0.121126	0.235547	-0.097264	-0.168556	-0.278472	0.0161049	-0.127491	0.239861	0.601213	-0.0526781	0.544352	0.139033	0.346013	0.356687	-0.197264	0.434194	0.171677	0.528114	0.334282	0.421828	-0.209012	-0.36626	-0.140271	0.916416	-0.0214466	0.510393	-0.21258	0.0613514	0.0330813	0.413805
JAKMIP2	-0.156223	-0.250033	-0.156528	-0.490278	-0.285776	-0.0981457	-0.546399	0.0269025	-0.00390846	-0.404757	0.198232	0.21117	0.284559	0.0113665	-0.164217	0.448557	-0.33602	-0.332844	-0.498994	0.0334167	-0.18819	-0.173616	-0.360173	-0.532728	0.000259691	-0.186933	0.46533	0.135079	-0.175362	-0.0398233	-0.484348	0.29695	0.033013	-0.132104	-0.235721	0.188348	0.138739	-0.110077	0.539675	-0.678882	-0.773847	-0.125163	0.390004	0.0897061	0.317707	-0.79689	0.281621	0.159891	0.781154
KCNK12	0.782895	0.87927	0.69509	0.446669	0.509594	0.183318	0.270525	0.0901313	0.168153	0.77749	-0.109948	0.100903	0.324039	0.219186	0.900747	-0.00321701	0.60325	0.896938	0.745976	-0.147606	0.0841609	0.757526	0.829216	0.840647	0.731073	0.75239	0.173615	0.547064	0.728199	0.646662	0.830444	-0.242389	0.837434	0.542399	0.584069	0.419902	0.0915634	0.182138	0.284605	0.680148	0.718167	0.0832916	0.146528	0.550198	0.300619	0.631232	0.318434	0.679115	-0.310199
CLEC9A	-0.293032	-0.184859	-0.42063	0.0852505	-0.147335	-0.308565	-0.412638	0.0767816	-0.200197	-0.179849	-0.360128	-0.352376	-0.176614	-0.150046	-0.403958	-0.10585	0.277031	-0.302895	-0.433916	0.291613	-0.719189	-0.0151284	-0.183026	-0.35594	-0.0559774	-0.0577611	-0.0835817	-0.273006	0.152359	0.0868384	-0.277403	-0.236946	-0.11753	-0.200814	0.268892	-0.438254	-0.229351	-0.544795	-0.370225	-0.257503	-0.272497	0.170244	-0.103106	-0.657441	-0.163308	-0.0466508	-0.45895	-0.259731	0.0344495
GPR37	-0.482439	-0.277292	-0.443897	0.212399	0.0287585	-0.266498	-0.350445	0.250737	-0.12994	-0.411544	0.0982932	0.0739185	-0.148552	0.0532354	-0.594881	0.196049	0.0560677	-0.4942	-0.757295	0.282122	-0.330616	-0.238012	-0.31287	-0.682455	-0.192093	-0.192003	-0.0758879	-0.230889	0.0153008	-0.116378	-0.500898	0.258375	-0.361162	-0.271086	0.22168	-0.567411	-0.241632	-0.24211	-0.356728	-0.277122	-0.302233	0.22536	0.138303	-0.655328	-0.261741	-0.111309	-0.542121	-0.554089	-0.00995508
CHIA	-0.145869	-0.347298	-0.63207	-0.491908	-0.173266	-0.517025	-0.559125	-0.250576	-0.505928	-0.689769	-0.481917	-0.425106	-0.395259	-0.683176	-0.445575	0.0431019	-0.640227	-0.212677	-0.400464	-0.437764	-0.254315	-0.499646	-0.287275	-0.574908	-0.661535	-0.462736	-0.385888	-0.402826	-0.622254	-0.501335	-0.414616	0.0110524	-0.264155	-0.361732	-0.0761129	-0.365716	-0.26698	-0.390444	-0.192077	0.00585853	-0.243158	-0.161591	-0.0824404	-0.426601	-0.577138	-0.636504	-0.331457	-0.537689	0.126313
KLRF2	-0.0260315	-0.173168	0.0327083	-0.546779	-0.227521	0.0412542	-0.374415	-0.00769878	0.088612	-0.33559	0.3718	0.3816	0.376194	0.0812067	0.0170359	0.513142	-0.475919	-0.204227	-0.315514	-0.100388	0.138127	-0.172651	-0.287985	-0.386511	0.0261765	-0.166699	0.520192	0.26613	-0.251974	-0.0813989	-0.372797	0.416938	0.0885567	-0.0437549	-0.368366	0.397731	0.249712	0.138242	0.729787	-0.583305	-0.674632	-0.208307	0.451283	0.397106	0.404335	-0.803003	0.503826	0.28566	0.792367
SETBP1	0.162551	0.363352	0.421469	0.594546	0.191654	0.5629	0.563027	0.632965	0.523074	0.508606	-0.0999853	0.068588	0.448635	0.505508	0.535984	0.0135865	0.375828	0.314692	0.760765	0.29626	0.024912	0.506362	0.241151	0.707838	0.356259	0.285477	0.279364	0.595957	0.267806	0.573716	0.791965	-0.21093	0.580627	0.332741	0.355685	0.627791	0.687231	0.0557041	0.256946	0.221773	0.153698	0.205391	0.191297	0.205264	0.514867	0.49801	0.436241	0.610722	0.173226
KERA	-0.194079	0.294948	0.000442407	0.593638	0.0643744	0.0475311	0.150658	0.733424	0.0952214	-0.235259	0.185395	0.468219	0.264813	0.471728	0.305232	0.824635	-0.230599	-0.0122616	0.0982852	-0.151442	0.296199	-0.0517491	-0.132571	-0.0107217	0.0131431	-0.132391	0.139172	0.657886	-0.0578703	0.729156	0.404173	0.114175	0.446526	-0.21793	0.473645	0.259554	0.685988	0.405614	0.35978	-0.119347	-0.249713	-0.225581	0.868917	-0.001745	0.632659	-0.00612601	0.0801619	0.11861	0.31259
F2	0.0672318	-0.177228	0.456864	-0.11018	0.254086	0.813792	0.142295	0.50547	0.857909	0.270947	0.49169	0.423284	0.822735	0.554518	0.0117609	0.0232481	0.162712	-0.119565	0.0310148	0.696751	-0.00200374	0.381818	-0.0266889	0.0167073	0.348251	0.229189	0.857881	0.423161	0.0910669	-0.349842	-0.0951427	0.676244	0.117313	0.594085	-0.262211	0.742864	0.428461	-0.14837	0.646435	-0.24237	-0.380681	0.628168	0.103529	0.409039	0.21554	-0.235401	0.82118	0.582738	0.7813
CRP	0.174352	-0.144263	0.458588	-0.24357	0.248848	0.737582	0.0296518	0.382296	0.782035	0.269546	0.413237	0.355054	0.806665	0.433743	0.0514583	-0.0012178	0.136199	-0.0415763	0.0312457	0.603967	-0.0568103	0.400779	0.0317782	0.0146482	0.364393	0.265306	0.856898	0.393452	0.0954927	-0.3873	-0.120099	0.644174	0.166145	0.618688	-0.274912	0.748738	0.346233	-0.205183	0.691676	-0.209173	-0.363405	0.592015	0.069977	0.462332	0.167576	-0.322022	0.8468	0.61976	0.797186
APCS	-0.338988	-0.302536	-0.656955	-0.0708735	-0.194235	-0.504032	-0.591634	-0.0231218	-0.398122	-0.420075	-0.563813	-0.534779	-0.352506	-0.418367	-0.566732	-0.122254	0.0517721	-0.361964	-0.554372	0.118309	-0.805826	-0.197801	-0.269087	-0.542038	-0.314877	-0.225072	-0.269017	-0.440962	-0.0779089	-0.106224	-0.40425	-0.254885	-0.223477	-0.332865	0.256905	-0.595863	-0.344369	-0.690202	-0.485742	-0.205468	-0.31089	0.116513	-0.164297	-0.831904	-0.41278	-0.236899	-0.610072	-0.482259	0.0262489
ADAMTSL3	0.146735	0.407735	0.367326	0.653143	0.380398	0.449274	0.228271	0.799757	0.521462	0.378801	0.0354706	0.257694	0.590747	0.586651	0.406308	0.275804	0.464902	0.242679	0.347243	0.406837	-0.164701	0.565913	0.259255	0.355454	0.478159	0.389846	0.467134	0.674881	0.445261	0.567581	0.555339	0.0917576	0.631588	0.377735	0.586974	0.49505	0.552728	-0.073213	0.346681	0.136818	0.00464786	0.395118	0.43754	0.0747268	0.449589	0.333162	0.343517	0.533627	0.318222
CYP2E1	-0.289938	-0.331404	-0.782394	-0.143888	-0.148024	-0.623243	-0.570027	-0.151459	-0.564321	-0.544985	-0.747624	-0.700608	-0.565483	-0.673326	-0.616035	-0.218294	-0.170238	-0.284847	-0.476878	-0.135119	-0.701781	-0.349008	-0.239981	-0.543137	-0.577407	-0.3479	-0.552751	-0.591234	-0.314893	-0.320388	-0.37022	-0.290376	-0.318153	-0.400182	0.240044	-0.711943	-0.44867	-0.703274	-0.651006	0.0578218	-0.118818	0.0514974	-0.295178	-0.896833	-0.714066	-0.24875	-0.735912	-0.698804	-0.166084
KNG1	-0.257408	-0.337003	-0.780368	-0.207053	-0.141234	-0.627431	-0.559893	-0.190234	-0.585199	-0.586648	-0.741151	-0.689477	-0.579824	-0.720946	-0.597081	-0.198738	-0.280515	-0.256956	-0.446878	-0.228136	-0.611928	-0.398247	-0.239083	-0.543843	-0.63784	-0.386346	-0.581881	-0.590195	-0.40394	-0.386805	-0.366952	-0.252416	-0.327118	-0.405254	0.189843	-0.68066	-0.440412	-0.656116	-0.614007	0.10289	-0.0970523	0.00770303	-0.28898	-0.836236	-0.749786	-0.304506	-0.698118	-0.714167	-0.161847
METTL7B	-0.153793	-0.332207	-0.661416	-0.412379	-0.145591	-0.542129	-0.523704	-0.251079	-0.534684	-0.655002	-0.559491	-0.503	-0.466099	-0.712118	-0.468819	-0.0393835	-0.567962	-0.194341	-0.372233	-0.420008	-0.303429	-0.481667	-0.253271	-0.536028	-0.678502	-0.446451	-0.475929	-0.459817	-0.588552	-0.494254	-0.372629	-0.0612777	-0.286165	-0.367518	-0.0113838	-0.447916	-0.317725	-0.436185	-0.320774	0.0882559	-0.151222	-0.126381	-0.157323	-0.516849	-0.654965	-0.523857	-0.430248	-0.599542	0.00637869
HRG	-0.0260315	-0.173168	0.0327083	-0.546779	-0.227521	0.0412542	-0.374415	-0.00769878	0.088612	-0.33559	0.3718	0.3816	0.376194	0.0812067	0.0170359	0.513142	-0.475919	-0.204227	-0.315514	-0.100388	0.138127	-0.172651	-0.287985	-0.386511	0.0261765	-0.166699	0.520192	0.26613	-0.251974	-0.0813989	-0.372797	0.416938	0.0885567	-0.0437549	-0.368366	0.397731	0.249712	0.138242	0.729787	-0.583305	-0.674632	-0.208307	0.451283	0.397106	0.404335	-0.803003	0.503826	0.28566	0.792367
ITIH1	-0.0338838	-0.284888	0.383581	-0.125347	0.172866	0.821357	0.189409	0.483127	0.85028	0.235861	0.460825	0.353414	0.749552	0.528735	-0.0844794	-0.0631793	0.139195	-0.215395	0.0229632	0.741169	-0.0177924	0.309468	-0.115015	-0.000167553	0.257836	0.143358	0.791545	0.32885	0.0139728	-0.409875	-0.135732	0.623268	0.00303008	0.532353	-0.341262	0.690114	0.42762	-0.176161	0.546447	-0.292159	-0.413134	0.620812	0.0105939	0.32536	0.1769	-0.220659	0.76657	0.507592	0.754429
FETUB	-0.0260315	-0.173168	0.0327083	-0.546779	-0.227521	0.0412542	-0.374415	-0.00769878	0.088612	-0.33559	0.3718	0.3816	0.376194	0.0812067	0.0170359	0.513142	-0.475919	-0.204227	-0.315514	-0.100388	0.138127	-0.172651	-0.287985	-0.386511	0.0261765	-0.166699	0.520192	0.26613	-0.251974	-0.0813989	-0.372797	0.416938	0.0885567	-0.0437549	-0.368366	0.397731	0.249712	0.138242	0.729787	-0.583305	-0.674632	-0.208307	0.451283	0.397106	0.404335	-0.803003	0.503826	0.28566	0.792367
AHSG	-0.33484	-0.301502	-0.682308	-0.0557017	-0.179446	-0.527315	-0.577493	-0.0401689	-0.428778	-0.425511	-0.611908	-0.58062	-0.402442	-0.460761	-0.580201	-0.160521	0.0450054	-0.345935	-0.535126	0.0904072	-0.807043	-0.212027	-0.254546	-0.529832	-0.354588	-0.236076	-0.334287	-0.47829	-0.0985922	-0.132175	-0.386515	-0.281957	-0.242694	-0.343379	0.274715	-0.636464	-0.373743	-0.705846	-0.547343	-0.145053	-0.256837	0.118857	-0.204767	-0.868166	-0.476494	-0.203288	-0.657116	-0.52981	-0.0364239
HUNK	0.201949	0.430863	0.668873	0.706995	0.474814	0.786625	0.570224	0.860243	0.811603	0.585306	0.39186	0.540614	0.777417	0.85914	0.54523	0.256441	0.485676	0.291215	0.538939	0.514227	0.211935	0.641128	0.313684	0.557082	0.603698	0.467275	0.628347	0.823085	0.468704	0.496902	0.656199	0.297733	0.599556	0.557582	0.383911	0.750776	0.708249	0.224185	0.511921	0.173501	0.109854	0.453372	0.437379	0.408805	0.591852	0.477056	0.624246	0.707187	0.313333
HPX	-0.0292584	-0.252193	0.372793	-0.101485	0.248995	0.77172	0.0975866	0.528627	0.831271	0.17388	0.534022	0.449999	0.781589	0.553076	-0.107946	0.0583366	0.121869	-0.221501	-0.105357	0.721961	-0.00897743	0.301201	-0.102295	-0.116488	0.277716	0.163543	0.828115	0.366427	0.0460667	-0.414064	-0.202489	0.746286	0.0172534	0.53292	-0.26915	0.643538	0.385744	-0.15951	0.585058	-0.291846	-0.434317	0.648636	0.119582	0.31215	0.15273	-0.275991	0.733183	0.461044	0.775006
CCL8	-0.0496363	0.375485	0.272423	0.52228	-0.099882	0.253797	0.574141	0.501393	0.178693	0.0645761	0.236223	0.443573	0.236064	0.517837	0.621194	0.600342	-0.23569	0.175451	0.610253	-0.268458	0.642219	-0.00225696	-0.0432326	0.486065	0.0928024	-0.100699	0.0844288	0.697109	-0.0889754	0.842462	0.709647	-0.155169	0.489645	-0.159704	0.178214	0.532324	0.847428	0.720355	0.432637	-0.0512641	-0.0377287	-0.469763	0.674401	0.391056	0.881966	0.223197	0.33613	0.387927	0.160952
STAB1	0.879341	0.778997	0.85347	0.307928	0.799813	0.452998	0.0614042	0.283281	0.522396	0.840034	0.131518	0.304287	0.725642	0.381347	0.747218	0.0072894	0.750473	0.832445	0.462806	0.233181	-0.0986066	0.977492	0.889928	0.598018	0.929749	0.956116	0.626521	0.645859	0.868766	0.266198	0.54955	0.283652	0.835022	0.909865	0.552937	0.600293	0.02399	-0.0830137	0.548251	0.624701	0.547722	0.575394	0.168719	0.636634	0.131447	0.404061	0.598817	0.828485	0.0525702
CDH4	0.0377286	0.337225	0.277655	0.648673	0.334114	0.431046	0.221077	0.882891	0.50253	0.2121	0.0802638	0.324776	0.583426	0.600308	0.349037	0.420067	0.277391	0.144225	0.284881	0.341694	-0.0730007	0.429007	0.133208	0.24225	0.344524	0.247206	0.448356	0.710002	0.282365	0.551756	0.514086	0.17001	0.589778	0.272605	0.557477	0.502936	0.65476	-0.00681309	0.391464	0.0638721	-0.112913	0.325309	0.560879	0.0404375	0.481917	0.21208	0.340128	0.453408	0.412841
CDH26	0.838481	0.922355	0.623189	0.48706	0.663566	0.0645036	0.156729	0.077224	0.0735315	0.726336	-0.19534	0.044603	0.243139	0.105177	0.826201	-0.0202208	0.623524	0.954145	0.636964	-0.205486	0.00877252	0.760512	0.91951	0.738984	0.681878	0.79361	0.0650601	0.467547	0.754628	0.536021	0.782291	-0.176319	0.815011	0.563812	0.731257	0.252808	-0.084778	0.0780054	0.155774	0.86286	0.850777	0.181362	0.114658	0.423942	0.0530625	0.65519	0.158656	0.519421	-0.447588
ITIH2	0.0920228	-0.171426	0.446779	-0.0901622	0.341167	0.793636	0.115202	0.497414	0.847294	0.27438	0.484665	0.411566	0.797416	0.52278	-0.0364056	-0.0160415	0.197411	-0.100734	-0.0212428	0.708117	-0.0248046	0.396049	0.0208055	-0.0233713	0.339179	0.262744	0.822127	0.374994	0.117033	-0.43643	-0.130493	0.732812	0.0802202	0.630981	-0.218499	0.669213	0.334238	-0.193853	0.577848	-0.153364	-0.304543	0.707333	0.0587867	0.362394	0.0843826	-0.20193	0.759211	0.510808	0.70521
F13B	0.0620677	-0.120107	0.383506	0.0116288	0.155588	0.792849	0.256906	0.566051	0.798396	0.315999	0.170707	0.171531	0.727932	0.473792	0.118202	-0.0778081	0.183111	-0.0402413	0.313389	0.633786	-0.116548	0.412701	-0.01732	0.241926	0.27134	0.180738	0.70178	0.442047	0.0363937	-0.148399	0.17542	0.340641	0.250594	0.521479	-0.14094	0.788472	0.582923	-0.239989	0.537876	-0.148308	-0.319367	0.540407	0.0419816	0.292466	0.279741	-0.0987348	0.773666	0.634612	0.731337
PRR16	0.122973	0.188352	0.571655	0.47462	0.163307	0.8191	0.77128	0.526391	0.739706	0.666782	0.135247	0.144236	0.509799	0.617182	0.44556	-0.230712	0.448435	0.214209	0.795368	0.518	0.169441	0.519885	0.198026	0.780737	0.398135	0.302144	0.380471	0.486466	0.258678	0.306264	0.676592	-0.0870658	0.348319	0.465008	0.0247807	0.715415	0.651313	0.126417	0.244802	0.147743	0.175329	0.327952	-0.054354	0.359707	0.476038	0.570455	0.592039	0.66234	0.150975
CFHR5	0.247533	0.0396391	0.62603	0.126705	0.593274	0.801144	0.257783	0.44777	0.853459	0.490051	0.615831	0.527459	0.750604	0.600891	0.071381	-0.0857427	0.421835	0.0963594	0.0322203	0.691691	0.129953	0.532404	0.276186	0.114642	0.501652	0.477821	0.73023	0.3704	0.364619	-0.411251	-0.0235448	0.791816	0.0882666	0.763049	-0.0728449	0.541911	0.141899	-0.0408085	0.433843	0.14054	0.0743679	0.797438	0.000186952	0.438367	-0.0399473	0.133649	0.641697	0.455463	0.32899
PRKCQ	0.00153713	0.120604	0.359814	0.269278	0.379537	0.530305	-0.00178215	0.80422	0.650247	0.0214806	0.605856	0.738489	0.818395	0.707378	0.153246	0.646594	0.0396422	-0.0695872	-0.163298	0.41946	0.142497	0.292029	-0.0166768	-0.181952	0.370641	0.199741	0.799283	0.724185	0.174643	0.136478	0.017657	0.773015	0.369043	0.363127	0.199775	0.593367	0.552299	0.125734	0.741077	-0.232896	-0.419238	0.41299	0.711269	0.305195	0.453812	-0.247728	0.591399	0.443552	0.75215
GPR34	0.538462	0.61805	0.708491	0.414855	0.782919	0.501921	0.0108928	0.686652	0.625111	0.422192	0.511258	0.74014	0.893819	0.658211	0.57071	0.563313	0.370021	0.494485	0.119081	0.246288	0.160098	0.693718	0.54526	0.176504	0.738996	0.668312	0.794967	0.877229	0.595701	0.284002	0.348956	0.724975	0.746794	0.705969	0.540477	0.655087	0.334758	0.152827	0.790628	0.30584	0.127805	0.522705	0.678539	0.576803	0.337707	0.0767997	0.646035	0.670054	0.420565
TBX5	0.432378	0.70964	0.302032	0.548978	0.55819	0.0282705	0.0632901	0.560651	0.0702736	0.079662	-0.00835299	0.373646	0.345437	0.247625	0.640922	0.661267	-0.0519601	0.586209	0.357747	-0.391351	0.284269	0.314768	0.453305	0.263311	0.245837	0.300782	0.117124	0.736035	0.197608	0.563886	0.650728	0.201176	0.77753	0.209677	0.747358	0.3543	0.39152	0.282051	0.435471	0.556316	0.320665	-0.00865467	0.734309	0.277884	0.251374	0.148526	0.20009	0.288065	0.0509509
CSF1R	0.621095	0.628828	0.878019	0.397259	0.776339	0.649009	0.148913	0.571302	0.749085	0.692084	0.548499	0.690114	0.933391	0.720113	0.628562	0.305057	0.618349	0.555044	0.25559	0.421724	0.1224	0.856393	0.64714	0.381797	0.915289	0.821565	0.86303	0.819572	0.774277	0.262696	0.394687	0.630569	0.720983	0.856985	0.431148	0.717045	0.268089	0.130789	0.746309	0.319988	0.244716	0.615256	0.452321	0.685848	0.363493	0.266394	0.733013	0.819897	0.323264
CA3	-0.158739	-0.38399	-0.56515	-0.639062	-0.252551	-0.453768	-0.66538	-0.213981	-0.416923	-0.745145	-0.294222	-0.240566	-0.203664	-0.569389	-0.408936	0.235874	-0.72431	-0.288996	-0.506075	-0.396944	-0.218596	-0.502706	-0.378174	-0.679617	-0.565729	-0.471611	-0.130562	-0.261797	-0.628019	-0.459729	-0.529559	0.15953	-0.201639	-0.345573	-0.193822	-0.189199	-0.147642	-0.323097	0.0997729	-0.249216	-0.502446	-0.210744	0.102617	-0.258647	-0.348604	-0.877213	-0.118423	-0.36955	0.430838
FNDC5	0.762609	0.686564	0.724384	0.32304	0.506351	0.406762	0.406341	0.0760641	0.351091	0.85483	-0.147284	-0.0218946	0.36624	0.192387	0.783966	-0.285258	0.603791	0.830377	0.853832	0.0313775	0.0582746	0.776134	0.784687	0.912768	0.643385	0.716081	0.20632	0.435319	0.599671	0.332565	0.794831	-0.194573	0.687123	0.67331	0.369796	0.53369	0.115718	0.038573	0.237019	0.717457	0.723993	0.267606	-0.124507	0.561386	0.133237	0.634745	0.456213	0.706518	-0.251819
S1PR3	0.122174	0.184621	0.512736	0.352907	0.0613168	0.748188	0.617093	0.546328	0.684232	0.536973	0.0862071	0.151226	0.572348	0.574151	0.489118	-0.0597497	0.301028	0.192123	0.7548	0.420994	0.116471	0.47236	0.120538	0.698009	0.375195	0.234852	0.467812	0.578948	0.174843	0.395373	0.648713	-0.0977137	0.460568	0.395245	0.0216823	0.812334	0.757848	0.103381	0.428355	0.00323136	-0.0258182	0.211027	0.107654	0.397345	0.615819	0.337754	0.682699	0.746589	0.383044
BRME1	0.247558	0.320654	0.819304	0.535336	0.588976	0.868874	0.593405	0.598394	0.895207	0.70372	0.752824	0.719801	0.767783	0.895852	0.387417	0.0679366	0.595456	0.236283	0.316169	0.650298	0.381374	0.637793	0.376752	0.4438	0.703082	0.577911	0.691868	0.615372	0.582113	0.114466	0.348334	0.59071	0.289395	0.708817	0.108242	0.617693	0.368907	0.330255	0.441105	0.18101	0.2484	0.606331	0.20571	0.566028	0.365246	0.52316	0.626329	0.602922	0.121787
COL1A1	0.358826	0.670914	0.460329	0.734951	0.350385	0.291157	0.431224	0.516437	0.283088	0.563301	-0.146053	0.103391	0.329217	0.42222	0.704423	0.137391	0.499358	0.560661	0.717785	0.0567362	0.0324519	0.588806	0.488401	0.734083	0.500235	0.465413	0.139469	0.622781	0.512115	0.800992	0.88365	-0.289201	0.746736	0.314905	0.652194	0.421315	0.460914	0.151011	0.179943	0.445223	0.421301	0.100144	0.307914	0.213431	0.471267	0.648422	0.219804	0.545332	-0.123783
FSCN2	-0.0922401	-0.216479	-0.0616399	-0.532978	-0.262923	-0.0277876	-0.470975	0.00950649	0.0444269	-0.379374	0.294409	0.30605	0.340149	0.0482361	-0.0737144	0.494373	-0.418257	-0.274411	-0.416283	-0.0357437	-0.0223789	-0.177756	-0.332015	-0.470429	0.0138356	-0.181341	0.506505	0.207306	-0.220166	-0.0626561	-0.438904	0.367716	0.0629768	-0.0893827	-0.311476	0.303012	0.200552	0.0169876	0.65365	-0.647007	-0.742608	-0.172043	0.432522	0.253049	0.371563	-0.821413	0.405494	0.230017	0.807926
DMGDH	0.105012	-0.163577	0.453466	-0.130943	0.367329	0.735874	0.0050527	0.446872	0.818745	0.26267	0.566764	0.476125	0.811292	0.528255	-0.0752269	0.0259377	0.243707	-0.119829	-0.168039	0.729334	-0.0592963	0.406625	0.0366305	-0.126532	0.405916	0.311562	0.874736	0.351252	0.200998	-0.456056	-0.24753	0.810353	0.0555947	0.64204	-0.212369	0.599605	0.225062	-0.198096	0.595611	-0.206029	-0.331427	0.729075	0.0868897	0.367691	0.0675014	-0.248246	0.724848	0.488809	0.70466
C6	-0.101977	-0.23688	0.359855	-0.0197129	0.232754	0.754582	0.102116	0.605877	0.829653	0.12596	0.624519	0.554917	0.799298	0.642924	-0.108724	0.187199	0.108144	-0.275464	-0.169245	0.727515	0.040475	0.266265	-0.152679	-0.170676	0.292028	0.135826	0.851902	0.426609	0.063597	-0.309108	-0.212525	0.781762	0.0241284	0.470891	-0.229388	0.623469	0.440681	-0.0729332	0.61149	-0.371493	-0.49678	0.604093	0.245343	0.294892	0.256088	-0.276515	0.702806	0.440273	0.797805
BHMT	-0.347602	-0.386178	-0.768328	-0.253001	-0.243338	-0.597451	-0.723283	-0.0942835	-0.495559	-0.604728	-0.612582	-0.569263	-0.398153	-0.565894	-0.634729	-0.0531245	-0.180581	-0.402717	-0.638783	-0.0302823	-0.782403	-0.336909	-0.348558	-0.684588	-0.471788	-0.350025	-0.308594	-0.488745	-0.272214	-0.247821	-0.513621	-0.189143	-0.269099	-0.406496	0.176126	-0.605182	-0.364267	-0.718714	-0.428022	-0.231422	-0.405894	0.0393718	-0.132504	-0.833887	-0.502588	-0.46522	-0.598895	-0.563262	0.127514
FMO1	-0.243264	-0.275289	-0.294728	-0.360081	-0.288973	-0.202792	-0.605069	0.0524564	-0.083503	-0.397713	0.0148688	0.0283861	0.15796	-0.0510875	-0.29422	0.318258	-0.159039	-0.389269	-0.575485	0.14393	-0.440034	-0.145702	-0.363132	-0.571316	-0.0222606	-0.173524	0.340687	-0.000949857	-0.0798759	0.00282979	-0.500882	0.143707	-0.0206265	-0.18685	-0.0816422	-0.0244403	0.0195169	-0.30721	0.285417	-0.649346	-0.731739	-0.0323243	0.272269	-0.191754	0.18996	-0.659615	0.0422664	0.0243336	0.642062
C3AR1	0.605355	0.679688	0.882939	0.507843	0.784602	0.664753	0.246546	0.646469	0.749956	0.693766	0.529688	0.705011	0.917391	0.759831	0.690918	0.35141	0.589949	0.586516	0.353603	0.372901	0.198834	0.844722	0.651664	0.456176	0.886159	0.795684	0.807604	0.88076	0.745859	0.358652	0.513732	0.583908	0.767847	0.822927	0.490456	0.74211	0.36153	0.205351	0.731738	0.374996	0.292054	0.567364	0.508925	0.682058	0.417931	0.342922	0.720251	0.81689	0.280791
ALDOB	-0.083805	-0.266045	0.375	-0.0324681	0.164848	0.84063	0.244352	0.579146	0.868921	0.21322	0.477388	0.396131	0.764202	0.594315	-0.0597812	0.0119986	0.117242	-0.23421	0.0535223	0.739146	0.0245748	0.292913	-0.147151	0.0156148	0.242663	0.110701	0.786979	0.394133	-0.00451671	-0.319286	-0.0743465	0.614166	0.0348189	0.493	-0.294685	0.71359	0.523516	-0.122171	0.558244	-0.308829	-0.437118	0.592257	0.0933512	0.30566	0.25462	-0.19114	0.762164	0.508398	0.772044
F9	0.00745656	-0.2501	0.409959	-0.166567	0.149611	0.810803	0.183157	0.456325	0.831991	0.230861	0.464886	0.373426	0.766505	0.51769	-0.0167876	-0.0153958	0.0869196	-0.174718	0.0657759	0.669849	0.0290391	0.304643	-0.104231	0.0295267	0.268803	0.141179	0.808319	0.373314	-0.00563227	-0.368335	-0.104079	0.609207	0.0562785	0.525888	-0.359204	0.746851	0.46402	-0.12675	0.621397	-0.300626	-0.424881	0.552128	0.0565469	0.401314	0.238692	-0.264216	0.821808	0.560645	0.790856
FTCD	-0.00489385	-0.387452	0.29434	-0.416872	0.0397091	0.672106	-0.00470493	0.209136	0.69905	0.159612	0.384218	0.221977	0.643398	0.315562	-0.174488	-0.162135	0.0633824	-0.253811	-0.0990368	0.655924	-0.120467	0.225431	-0.158066	-0.110396	0.204203	0.0973097	0.75581	0.147335	-0.046091	-0.557374	-0.329915	0.563961	-0.0981273	0.47735	-0.50348	0.59957	0.240075	-0.27382	0.53104	-0.389669	-0.486849	0.533046	-0.126241	0.330635	0.0777123	-0.407171	0.734863	0.462752	0.776022
SIRPB2	0.82424	0.819231	0.925566	0.426233	0.78511	0.46909	0.22299	0.249909	0.521743	0.898448	0.322647	0.45133	0.669675	0.505035	0.784881	0.0397188	0.789801	0.816126	0.475572	0.221469	0.110609	0.9355	0.888351	0.65509	0.974514	0.957946	0.572236	0.647434	0.930455	0.361812	0.576092	0.285361	0.75734	0.856047	0.508455	0.537004	0.0148802	0.155306	0.487819	0.607344	0.63975	0.483493	0.194622	0.703254	0.230542	0.566765	0.538199	0.781478	-0.121295
COL14A1	0.0434108	0.393297	0.307113	0.705679	0.10928	0.388966	0.527424	0.629485	0.363785	0.398117	-0.0866214	0.103417	0.315059	0.510335	0.507422	0.149189	0.346062	0.247242	0.654791	0.20245	0.0521774	0.392942	0.169335	0.622535	0.310681	0.206169	0.156331	0.571911	0.279389	0.758593	0.7734	-0.300341	0.550251	0.142825	0.444253	0.451843	0.663355	0.162372	0.155811	0.143087	0.126427	0.0472292	0.30827	0.0853504	0.597002	0.535145	0.236665	0.472319	0.0657318
RAB27B	0.431095	0.688623	0.625493	0.569661	0.415483	0.449845	0.349954	0.65999	0.466074	0.453008	0.196584	0.48727	0.663434	0.607102	0.823224	0.513373	0.244969	0.55369	0.629343	0.00287681	0.283139	0.575231	0.436308	0.595139	0.581817	0.459017	0.495329	0.927601	0.413151	0.755296	0.794472	0.114346	0.882039	0.416022	0.527601	0.757089	0.684774	0.34979	0.679245	0.277107	0.168287	0.0753856	0.665981	0.559099	0.703506	0.293245	0.60282	0.761768	0.297002
CD163	0.736719	0.564015	0.871471	0.161281	0.732718	0.625102	0.0362672	0.357645	0.713326	0.765442	0.377989	0.471133	0.896019	0.525325	0.589649	0.0584204	0.677672	0.605958	0.282158	0.444303	-0.0664168	0.918451	0.705376	0.418158	0.926982	0.878095	0.863287	0.663163	0.783904	0.0813868	0.317862	0.533764	0.689187	0.945994	0.319792	0.717945	0.108338	-0.0830612	0.711292	0.350301	0.270573	0.676179	0.204313	0.698989	0.20574	0.195907	0.775186	0.874872	0.333199
C9	-0.259915	-0.339642	-0.782949	-0.210436	-0.144194	-0.629125	-0.565901	-0.189406	-0.585606	-0.590261	-0.740534	-0.688771	-0.577732	-0.720817	-0.599845	-0.195353	-0.281556	-0.260974	-0.452729	-0.226108	-0.616491	-0.399314	-0.242732	-0.549465	-0.637413	-0.387755	-0.577816	-0.589821	-0.404156	-0.386257	-0.371968	-0.250897	-0.327083	-0.406924	0.189064	-0.680593	-0.439951	-0.659089	-0.610762	0.0958441	-0.104737	0.00753404	-0.285964	-0.837936	-0.747162	-0.31099	-0.697367	-0.713382	-0.155035
MBL2	0.0283698	-0.250393	0.410843	-0.268784	0.167828	0.703076	-0.00906256	0.344954	0.768361	0.196783	0.592677	0.468203	0.777473	0.504501	-0.0830455	0.0508753	0.136537	-0.211378	-0.176329	0.683799	-0.022894	0.303259	-0.0910175	-0.145719	0.36334	0.204638	0.888471	0.321496	0.109676	-0.411118	-0.309209	0.726124	0.0071486	0.530133	-0.376067	0.634457	0.281075	-0.130955	0.658162	-0.402463	-0.483111	0.562897	0.0953568	0.419792	0.213178	-0.36707	0.771279	0.523759	0.799898
VTN	0.0247172	-0.215304	0.412128	-0.102536	0.244814	0.804048	0.142174	0.520481	0.847905	0.232466	0.474406	0.402614	0.794841	0.539897	-0.0370645	0.014478	0.13867	-0.158081	0.00658761	0.704322	-0.0124648	0.34634	-0.0609683	-0.0167293	0.298008	0.190067	0.826087	0.393234	0.0514418	-0.381142	-0.11638	0.67946	0.0771797	0.566264	-0.265126	0.709582	0.426215	-0.168683	0.605386	-0.246011	-0.394238	0.637341	0.0899476	0.35588	0.178619	-0.241891	0.784701	0.531251	0.774753
SLC22A7	-0.105301	-0.296427	-0.236335	-0.653732	-0.280276	-0.176575	-0.575114	-0.0865766	-0.118796	-0.561525	0.126772	0.156276	0.180393	-0.182233	-0.183321	0.464207	-0.621919	-0.28957	-0.468957	-0.212643	-0.0409276	-0.331441	-0.378197	-0.585519	-0.214104	-0.317667	0.322632	0.0688678	-0.42789	-0.239445	-0.508808	0.352884	-0.0254628	-0.187086	-0.328739	0.182499	0.106317	-0.0701316	0.548313	-0.548265	-0.718971	-0.225502	0.365043	0.137527	0.143337	-0.948086	0.287479	0.0405516	0.758578
AQP8	-0.0260315	-0.173168	0.0327083	-0.546779	-0.227521	0.0412542	-0.374415	-0.00769878	0.088612	-0.33559	0.3718	0.3816	0.376194	0.0812067	0.0170359	0.513142	-0.475919	-0.204227	-0.315514	-0.100388	0.138127	-0.172651	-0.287985	-0.386511	0.0261765	-0.166699	0.520192	0.26613	-0.251974	-0.0813989	-0.372797	0.416938	0.0885567	-0.0437549	-0.368366	0.397731	0.249712	0.138242	0.729787	-0.583305	-0.674632	-0.208307	0.451283	0.397106	0.404335	-0.803003	0.503826	0.28566	0.792367
NTNG1	0.673518	0.888961	0.507432	0.512072	0.70171	0.0407163	-0.064546	0.464306	0.123736	0.319549	0.0446719	0.420667	0.487819	0.286015	0.778365	0.604226	0.241305	0.770424	0.332414	-0.297155	0.140855	0.581656	0.690903	0.339804	0.571142	0.602741	0.305963	0.792829	0.537876	0.621299	0.641785	0.235329	0.936698	0.432129	0.839932	0.397147	0.219901	0.204546	0.543515	0.610641	0.424983	0.122144	0.703976	0.429958	0.272436	0.212104	0.289517	0.493631	0.0332322
LRRC55	0.0744321	0.409033	0.470894	0.580608	0.0359659	0.516884	0.69697	0.592783	0.44047	0.351868	0.221784	0.398109	0.425007	0.638057	0.685524	0.371195	0.0485814	0.270167	0.777322	0.01046	0.509631	0.268341	0.103468	0.689178	0.29159	0.109098	0.260984	0.753477	0.0988521	0.775703	0.817643	-0.136728	0.570424	0.1172	0.191715	0.710479	0.87918	0.561202	0.464877	0.0475132	0.0579139	-0.189232	0.504844	0.465746	0.855684	0.39141	0.517141	0.606959	0.200817
LAIR1	0.377307	0.349844	0.707269	0.213599	0.56115	0.694851	0.0736474	0.658722	0.797407	0.426522	0.607413	0.7218	0.985364	0.732546	0.434259	0.425768	0.340145	0.263944	0.101061	0.479745	0.119047	0.640177	0.329396	0.151178	0.709956	0.555476	0.96206	0.809125	0.480549	0.138149	0.194936	0.73728	0.580346	0.708219	0.210345	0.802662	0.451767	0.0949961	0.87326	-0.00550335	-0.143009	0.55465	0.541938	0.621847	0.457578	-0.0633471	0.832833	0.776723	0.667995
CRABP2	-0.0628273	0.255934	0.32046	0.755458	0.139522	0.549907	0.66889	0.69459	0.513611	0.448806	0.000221587	0.114567	0.331661	0.599028	0.368747	-0.000219702	0.413732	0.130577	0.640488	0.40444	0.0728043	0.389375	0.109983	0.618835	0.271322	0.181566	0.16883	0.493374	0.253281	0.585748	0.715973	-0.212092	0.380887	0.200388	0.342537	0.439576	0.664854	0.12877	0.0481159	0.137601	0.140006	0.20919	0.165328	0.0240066	0.498341	0.631988	0.238534	0.410316	0.0304565
KRT18	-0.612026	-0.61423	-0.357529	-0.255977	-0.817808	-0.0251331	0.28711	-0.383178	-0.140547	-0.126752	-0.0958365	-0.384315	-0.460832	-0.118618	-0.40697	-0.480662	-0.11791	-0.590287	0.0259562	0.191515	-0.0372125	-0.456316	-0.602172	0.0290862	-0.381096	-0.520294	-0.316398	-0.543164	-0.370288	-0.0537876	-0.240289	-0.581256	-0.629409	-0.499779	-0.680823	-0.23107	0.0507703	0.0366632	-0.449704	-0.626823	-0.349904	-0.385444	-0.521463	-0.285499	0.185809	0.0386794	-0.224602	-0.231735	-0.0956451
PAK3	0.28747	0.569632	0.499923	0.677679	0.262714	0.442936	0.531414	0.575591	0.414204	0.561608	-0.0583289	0.159465	0.423301	0.515145	0.699585	0.140245	0.42593	0.472089	0.779246	0.13901	0.109285	0.559094	0.381513	0.764685	0.477207	0.394165	0.244317	0.676971	0.413541	0.766011	0.880595	-0.246305	0.713822	0.324786	0.496076	0.579859	0.621943	0.199598	0.291498	0.314129	0.288766	0.0928386	0.317165	0.298373	0.593564	0.579971	0.380656	0.638806	0.037608
CAPN6	0.787489	0.716912	0.703869	0.293353	0.483042	0.317662	0.278404	0.0184553	0.289092	0.872077	-0.192428	-0.0644804	0.356763	0.155902	0.777076	-0.289804	0.699899	0.837641	0.770683	0.0539135	-0.0840903	0.824102	0.811909	0.870775	0.723544	0.776593	0.235164	0.405745	0.710687	0.397328	0.740178	-0.252452	0.72282	0.668207	0.424095	0.468412	0.0254317	-0.0417203	0.226782	0.661283	0.691133	0.26737	-0.127797	0.518806	0.148843	0.614111	0.402899	0.726921	-0.247432
P2RY11	0.889399	0.857794	0.907372	0.4051	0.823808	0.449072	0.258589	0.249861	0.473272	0.837548	0.236982	0.414015	0.631733	0.414458	0.849889	0.0737795	0.628049	0.905002	0.590548	0.0492998	0.21593	0.882283	0.919461	0.702973	0.860165	0.901824	0.478511	0.678882	0.78897	0.318305	0.673752	0.283764	0.806826	0.842544	0.52584	0.587816	0.0680947	0.194518	0.512561	0.752732	0.717614	0.420782	0.220776	0.746532	0.163389	0.529775	0.566407	0.754749	-0.140103
CNR1	0.81002	0.624323	0.744303	0.135032	0.684554	0.498262	0.0591381	0.322058	0.534057	0.651175	0.0448216	0.23861	0.739049	0.285224	0.696875	0.0536539	0.440067	0.746349	0.524493	0.133021	-0.0382112	0.820306	0.727379	0.542258	0.700209	0.747228	0.618357	0.660283	0.545315	0.122627	0.534083	0.316014	0.804633	0.836107	0.400089	0.746849	0.203022	-0.11492	0.662133	0.559931	0.374031	0.498676	0.196125	0.653396	0.123119	0.158354	0.733115	0.82278	0.279742
ADAM19	0.646452	0.633668	0.730143	0.415504	0.651781	0.537738	0.126507	0.493604	0.61247	0.768319	0.0624049	0.240003	0.755597	0.48594	0.635934	0.0147081	0.756307	0.629538	0.467251	0.418407	-0.230668	0.930042	0.688756	0.570339	0.845792	0.819226	0.66034	0.670512	0.784438	0.365762	0.569036	0.189582	0.7997	0.80693	0.554686	0.639323	0.236083	-0.18057	0.505982	0.425586	0.326516	0.603949	0.199613	0.446914	0.266566	0.397402	0.586251	0.828609	0.218116
MMP27	-0.324863	-0.255504	-0.559242	-0.00501506	-0.17886	-0.422212	-0.524159	0.0233759	-0.312345	-0.319644	-0.475648	-0.455912	-0.272877	-0.299933	-0.501931	-0.111314	0.153631	-0.344171	-0.51302	0.201364	-0.780634	-0.117898	-0.237541	-0.470295	-0.199298	-0.152924	-0.181476	-0.36821	0.0260819	-0.0184359	-0.357332	-0.247144	-0.177317	-0.278239	0.26386	-0.529801	-0.294688	-0.634846	-0.433399	-0.24099	-0.307085	0.141958	-0.133851	-0.762945	-0.299445	-0.161409	-0.546167	-0.38445	0.0396593
RAB42	0.885387	0.741634	0.775147	0.267077	0.702825	0.322365	0.149101	-0.00659359	0.339942	0.916912	-0.0536451	0.0433627	0.427883	0.16932	0.691478	-0.308424	0.82088	0.871852	0.562881	0.147575	-0.125695	0.914752	0.934201	0.726415	0.831503	0.928092	0.327049	0.36234	0.858751	0.193206	0.570884	0.00448183	0.66692	0.827381	0.472052	0.3757	-0.199932	-0.113345	0.221409	0.759313	0.780634	0.484149	-0.160261	0.533263	-0.0624538	0.605759	0.376828	0.668012	-0.302941
DNAJB13	-0.0559077	-0.0657262	0.283709	0.0996776	-0.266935	0.605138	0.66093	0.262106	0.467853	0.329267	-0.0390863	-0.0584029	0.269848	0.3228	0.332274	-0.203816	-0.00834399	0.0207583	0.775968	0.222625	0.221586	0.143361	-0.118896	0.651155	0.0397502	-0.0825065	0.192175	0.304304	-0.181041	0.241147	0.533442	-0.308628	0.186242	0.120383	-0.298142	0.684655	0.722291	0.162097	0.257862	-0.125539	-0.108358	-0.0767816	-0.0934516	0.323046	0.544464	0.205511	0.566216	0.539259	0.305586
HSD17B13	0.255025	-0.0768114	0.468321	-0.283559	0.265778	0.674909	-0.0554225	0.34372	0.728596	0.270401	0.361682	0.335378	0.816456	0.380673	0.11175	0.0366979	0.134777	0.0315331	0.0333393	0.532618	-0.0989429	0.435037	0.0883029	0.0176979	0.403596	0.309358	0.870079	0.421396	0.13134	-0.344239	-0.103861	0.621113	0.250658	0.633103	-0.221952	0.759655	0.316123	-0.230189	0.743604	-0.181312	-0.352465	0.561723	0.107695	0.495315	0.175044	-0.367452	0.859043	0.662033	0.816097
FAM180A	0.0899176	0.471998	0.44015	0.79174	0.287404	0.510671	0.546379	0.810026	0.513969	0.401676	0.151225	0.375384	0.511936	0.697428	0.569893	0.357252	0.324011	0.278537	0.593652	0.240899	0.206611	0.452255	0.218145	0.562518	0.407589	0.280431	0.332645	0.766266	0.329503	0.752172	0.772508	-0.013934	0.629312	0.255131	0.504615	0.574783	0.752343	0.287035	0.348206	0.167938	0.109429	0.146262	0.520022	0.222028	0.661146	0.495884	0.372853	0.539937	0.17616
PARPBP	0.35167	0.136178	0.721565	0.0244995	0.425234	0.869621	0.235634	0.494145	0.907675	0.556172	0.496335	0.486504	0.930878	0.636495	0.334601	0.0231244	0.380415	0.197718	0.2756	0.63568	0.0574358	0.643311	0.271125	0.308752	0.627154	0.504939	0.925493	0.604406	0.366337	-0.125059	0.17264	0.601447	0.394671	0.7844	-0.0869224	0.879602	0.431124	-0.0477089	0.754175	-0.0196487	-0.120218	0.636605	0.150585	0.63672	0.333562	-0.0130538	0.935066	0.823797	0.652319
IGF1	0.847539	0.892637	0.753125	0.484162	0.788018	0.279881	0.0700333	0.308489	0.34895	0.781236	0.00281354	0.244291	0.571273	0.330174	0.798205	0.0912502	0.74091	0.884959	0.49912	0.0787597	-0.095991	0.924357	0.912704	0.627887	0.870043	0.917347	0.430844	0.64785	0.881544	0.478418	0.675819	0.115149	0.897401	0.763618	0.74577	0.451497	0.0203091	-0.0255232	0.407911	0.715508	0.646689	0.440273	0.252436	0.502554	0.150069	0.524627	0.39181	0.71038	-0.122962
TOX3	0.0844987	0.185346	0.207907	0.352152	-0.0113453	0.39127	0.637624	0.331983	0.259245	0.26931	-0.25113	-0.12939	0.102651	0.176298	0.432231	-0.103212	-0.0464503	0.262155	0.847104	-0.0668577	0.265115	0.14828	0.091894	0.68582	-0.0579447	-0.0328914	-0.0987532	0.334448	-0.168259	0.330484	0.745182	-0.351538	0.330137	0.0860391	0.0845015	0.493692	0.618438	0.175063	0.0761652	0.306266	0.23075	-0.0925334	0.0043637	0.181895	0.303035	0.379509	0.307657	0.333536	-0.00751314
NEIL3	0.266296	0.427926	0.496678	0.496725	0.728284	0.445378	-0.0161992	0.799334	0.591763	0.213788	0.555879	0.755333	0.790789	0.682546	0.301407	0.613763	0.288914	0.236548	-0.116627	0.340684	0.127083	0.508475	0.336322	-0.0679207	0.549756	0.483641	0.702312	0.759743	0.466529	0.192452	0.173458	0.807549	0.525459	0.54007	0.534415	0.454519	0.320347	0.115406	0.615316	0.179676	-0.00930075	0.562973	0.699933	0.309879	0.239688	0.037501	0.442329	0.405102	0.412444
F13A1	0.487897	0.580294	0.690538	0.494272	0.764258	0.561985	0.0534749	0.750699	0.689712	0.505036	0.415791	0.629686	0.899487	0.689447	0.522764	0.429258	0.524988	0.454544	0.160033	0.411204	-0.00157675	0.771467	0.537029	0.236149	0.771597	0.700216	0.802268	0.83924	0.666135	0.311647	0.386067	0.623497	0.738095	0.737554	0.582239	0.642195	0.351033	0.0155842	0.69093	0.289435	0.121315	0.629357	0.573123	0.458941	0.327944	0.183898	0.611924	0.694783	0.412392
PAH	-0.128799	-0.328518	-0.610073	-0.469277	-0.154223	-0.501608	-0.518217	-0.253776	-0.498542	-0.662796	-0.479653	-0.423836	-0.403107	-0.677739	-0.424085	0.0240723	-0.630855	-0.186423	-0.361564	-0.44754	-0.222294	-0.489581	-0.263218	-0.536395	-0.658495	-0.450771	-0.405575	-0.400282	-0.617026	-0.501038	-0.381243	0.00363921	-0.261633	-0.34827	-0.0725868	-0.360785	-0.266237	-0.367399	-0.206989	0.0474069	-0.195945	-0.160324	-0.0984038	-0.409899	-0.586673	-0.594332	-0.330574	-0.536513	0.0863191
A1BG	0.0200431	-0.230121	0.430149	-0.0678215	0.267477	0.838132	0.193507	0.504059	0.877275	0.299286	0.470349	0.368346	0.772062	0.550007	-0.067449	-0.0883343	0.226146	-0.160452	0.0227818	0.775611	-0.0375771	0.380292	-0.0355824	0.0216781	0.317342	0.223563	0.802098	0.339382	0.0982311	-0.420205	-0.114229	0.658657	0.028305	0.601163	-0.272637	0.6715	0.376951	-0.198483	0.521973	-0.208301	-0.329964	0.700037	-0.00534665	0.324526	0.122408	-0.14866	0.750548	0.511708	0.695154
THEMIS2	0.756285	0.922713	0.799751	0.569005	0.715678	0.329602	0.189099	0.418914	0.387998	0.715893	0.201574	0.465316	0.633497	0.503431	0.891964	0.329083	0.605278	0.831505	0.531013	0.0105777	0.148044	0.835165	0.814441	0.637057	0.868004	0.829127	0.48595	0.813102	0.815539	0.659254	0.7383	0.171775	0.935931	0.663912	0.704524	0.557113	0.229008	0.243684	0.555936	0.582669	0.543118	0.273879	0.485469	0.623195	0.416372	0.49718	0.474286	0.758248	-0.0381438
PTN	0.279978	0.551628	0.34092	0.680878	0.293227	0.220226	0.324178	0.438131	0.231278	0.549112	-0.256092	-0.0586936	0.236278	0.326631	0.526238	-0.0307125	0.61039	0.454033	0.58328	0.183743	-0.195653	0.580118	0.43843	0.637111	0.468777	0.453918	0.0901712	0.437416	0.549731	0.699017	0.740272	-0.364744	0.617084	0.287298	0.634929	0.257555	0.303783	-0.0517107	0.00539845	0.382674	0.380477	0.190658	0.133789	0.0218172	0.327674	0.651776	0.0772188	0.441289	-0.168501
FABP1	0.0387221	-0.244708	0.442034	-0.168476	0.172652	0.825991	0.16806	0.419432	0.855497	0.313917	0.450677	0.334104	0.774489	0.517641	-0.0313168	-0.109832	0.210247	-0.159021	0.0541635	0.752751	-0.0567943	0.377678	-0.0561146	0.054379	0.341103	0.215893	0.833365	0.330796	0.0914175	-0.388694	-0.124492	0.586212	0.0467192	0.58517	-0.351576	0.72007	0.389194	-0.196162	0.578476	-0.289641	-0.387528	0.625133	-0.0278305	0.386207	0.200966	-0.206798	0.808539	0.585989	0.751876
PLPPR4	-0.319512	-0.254449	-0.496953	-0.0515507	-0.204223	-0.368133	-0.54122	0.0482194	-0.249279	-0.313136	-0.367265	-0.351339	-0.169489	-0.219706	-0.460772	-0.026278	0.137467	-0.363907	-0.535803	0.231816	-0.742026	-0.0988898	-0.262808	-0.487038	-0.129515	-0.137211	-0.0520301	-0.285094	0.045883	0.0185201	-0.386409	-0.178023	-0.137093	-0.253045	0.210345	-0.429639	-0.227355	-0.579901	-0.290617	-0.349046	-0.40672	0.123811	-0.0472129	-0.660252	-0.172707	-0.241018	-0.430935	-0.284204	0.168104
MS4A2	-0.298746	-0.179099	-0.465663	0.145685	-0.101486	-0.342242	-0.390627	0.0823678	-0.238624	-0.188073	-0.431273	-0.415709	-0.249961	-0.198483	-0.438968	-0.158729	0.289083	-0.285458	-0.421541	0.271626	-0.73568	-0.0281013	-0.157361	-0.34972	-0.113009	-0.0668786	-0.184917	-0.326897	0.137602	0.0517296	-0.250007	-0.265101	-0.148705	-0.213163	0.328167	-0.519047	-0.278011	-0.580638	-0.484243	-0.154268	-0.182864	0.20165	-0.156855	-0.74264	-0.274484	0.0258438	-0.553464	-0.349687	-0.0727905
TPBGL	-0.497799	-0.33332	-0.486714	0.135941	-0.200062	-0.401461	-0.108749	-0.213537	-0.366166	-0.264805	-0.0493015	-0.214909	-0.569564	-0.17697	-0.605504	-0.23213	0.117061	-0.452059	-0.539562	0.131752	-0.212165	-0.365703	-0.28849	-0.419801	-0.308265	-0.26289	-0.486098	-0.602845	-0.019083	-0.151297	-0.437521	-0.17093	-0.622191	-0.424986	-0.0154559	-0.819268	-0.487117	-0.115833	-0.764923	-0.167225	0.013991	-0.0243987	-0.311065	-0.675728	-0.386682	0.201723	-0.786705	-0.721776	-0.522736
COL6A6	-0.173301	0.217131	0.110112	0.626347	-0.113549	0.296797	0.513438	0.604661	0.25416	0.17293	-0.109617	0.061377	0.185141	0.447725	0.371135	0.218922	0.117413	0.0453294	0.571802	0.124367	0.0980018	0.151751	-0.0710903	0.487962	0.0899477	-0.0453552	0.0486705	0.484785	0.0417107	0.754053	0.672555	-0.369448	0.403766	-0.0913135	0.309735	0.378829	0.74379	0.212033	0.105253	-0.0536209	-0.0678483	-0.133795	0.343005	-0.0295454	0.654322	0.387703	0.152624	0.328046	0.137828
AKR1D1	-0.0260315	-0.173168	0.0327083	-0.546779	-0.227521	0.0412542	-0.374415	-0.00769878	0.088612	-0.33559	0.3718	0.3816	0.376194	0.0812067	0.0170359	0.513142	-0.475919	-0.204227	-0.315514	-0.100388	0.138127	-0.172651	-0.287985	-0.386511	0.0261765	-0.166699	0.520192	0.26613	-0.251974	-0.0813989	-0.372797	0.416938	0.0885567	-0.0437549	-0.368366	0.397731	0.249712	0.138242	0.729787	-0.583305	-0.674632	-0.208307	0.451283	0.397106	0.404335	-0.803003	0.503826	0.28566	0.792367
MYMX	-0.280853	-0.156136	-0.412554	0.15612	-0.112427	-0.304958	-0.35015	0.0755395	-0.206158	-0.129472	-0.399363	-0.393156	-0.221878	-0.156499	-0.394273	-0.171593	0.332705	-0.266505	-0.378703	0.296446	-0.716416	0.00849534	-0.138944	-0.293509	-0.0578321	-0.0336728	-0.150931	-0.300639	0.181666	0.0951912	-0.21914	-0.28589	-0.125934	-0.188989	0.310369	-0.478654	-0.256073	-0.547206	-0.457214	-0.171573	-0.173864	0.19316	-0.160627	-0.691262	-0.212743	0.062521	-0.512978	-0.290379	-0.072933
SERPINF2	-0.0092276	-0.280054	0.361136	-0.179773	0.1505	0.781896	0.121136	0.459096	0.815812	0.209941	0.408299	0.316797	0.752586	0.480049	-0.0738569	-0.0475098	0.114423	-0.20166	0.0134486	0.706751	-0.0690863	0.310226	-0.115044	-0.0184042	0.254807	0.14061	0.803091	0.331454	0.00241389	-0.401183	-0.14681	0.599505	0.0395023	0.524321	-0.333168	0.702105	0.422565	-0.219469	0.580718	-0.309419	-0.449566	0.598214	0.023958	0.325759	0.181613	-0.285496	0.7798	0.52975	0.803619
IRX6	-0.283272	-0.359609	-0.801567	-0.230774	-0.168933	-0.6403	-0.614664	-0.177562	-0.584441	-0.6134	-0.733274	-0.681482	-0.556588	-0.711769	-0.622534	-0.168663	-0.277052	-0.296348	-0.502804	-0.198248	-0.661795	-0.401249	-0.27216	-0.593903	-0.624811	-0.393753	-0.538684	-0.584565	-0.394655	-0.372958	-0.412503	-0.24148	-0.324556	-0.418655	0.18736	-0.680841	-0.435338	-0.686373	-0.585546	0.0321015	-0.170455	0.0108924	-0.260525	-0.855436	-0.718615	-0.357481	-0.692589	-0.702443	-0.0983971
KNL1	0.633838	0.640996	0.794352	0.289139	0.784711	0.470637	-0.0297803	0.487884	0.591149	0.506337	0.603006	0.772466	0.874392	0.619395	0.594562	0.488845	0.432195	0.547097	0.0746685	0.224284	0.199232	0.724811	0.620131	0.187276	0.836862	0.754911	0.820463	0.803898	0.691124	0.217594	0.26046	0.745964	0.699708	0.760594	0.437982	0.618451	0.172092	0.203284	0.804043	0.301801	0.198162	0.499044	0.588976	0.70108	0.309117	0.0797529	0.66446	0.699627	0.337218
ARHGEF38	-0.305753	-0.426299	-0.8112	-0.40936	-0.25168	-0.641712	-0.75916	-0.176948	-0.565062	-0.734387	-0.627135	-0.571636	-0.440336	-0.6928	-0.636313	-0.00291523	-0.42341	-0.378632	-0.628458	-0.21877	-0.64965	-0.460127	-0.376842	-0.739813	-0.619737	-0.452573	-0.370228	-0.509389	-0.472322	-0.39677	-0.549959	-0.11385	-0.300982	-0.443084	0.0772581	-0.569526	-0.363382	-0.666308	-0.360412	-0.173759	-0.40776	-0.0507095	-0.115411	-0.754596	-0.592674	-0.627594	-0.546911	-0.620368	0.166819
SLC6A2	0.633029	0.652101	0.759588	0.446452	0.553837	0.568782	0.290206	0.450476	0.597988	0.818475	0.0358939	0.205359	0.693736	0.495471	0.728649	-0.0302543	0.718192	0.660694	0.650273	0.348061	-0.111412	0.895819	0.672522	0.732537	0.813511	0.7695	0.577187	0.680118	0.729852	0.466028	0.703805	0.0389341	0.807866	0.749674	0.488504	0.693831	0.332396	-0.0589149	0.481952	0.434924	0.38115	0.469203	0.163599	0.510775	0.375012	0.492757	0.61043	0.869237	0.146266
KL	0.712904	0.707182	0.70581	0.456147	0.566869	0.442999	0.349529	0.27539	0.43041	0.853113	-0.161981	0.00781828	0.471858	0.297192	0.75518	-0.205922	0.711572	0.786904	0.784194	0.175342	-0.091723	0.860107	0.773712	0.854972	0.710544	0.762166	0.309438	0.527135	0.691515	0.425137	0.805823	-0.150546	0.768197	0.706054	0.524971	0.548549	0.186837	-0.0706356	0.262186	0.669703	0.633576	0.393653	-0.0204448	0.450078	0.182442	0.643667	0.446173	0.74119	-0.142516
TACR3	-0.305617	-0.274126	-0.433504	-0.177319	-0.250446	-0.313784	-0.594205	0.0571511	-0.18724	-0.358033	-0.221841	-0.206816	-0.0357713	-0.151708	-0.413048	0.116877	0.0313805	-0.394733	-0.580776	0.216708	-0.658343	-0.117034	-0.317567	-0.544896	-0.081956	-0.153991	0.116703	-0.177023	0.00571732	0.0211408	-0.453091	-0.0537983	-0.0925138	-0.235632	0.10182	-0.280371	-0.133478	-0.495928	-0.0629811	-0.498566	-0.566412	0.0684533	0.0860206	-0.498176	-0.0213992	-0.423211	-0.253574	-0.163605	0.377163
MRC1	0.558198	0.635789	0.814964	0.440831	0.729015	0.63252	0.183652	0.68923	0.720116	0.550993	0.533106	0.740591	0.937682	0.737397	0.676026	0.486931	0.41581	0.532674	0.310103	0.28944	0.238859	0.748833	0.559087	0.363419	0.794469	0.690634	0.828149	0.930373	0.609815	0.356099	0.477727	0.635008	0.783649	0.748742	0.461113	0.791019	0.452151	0.230402	0.831484	0.296221	0.16029	0.489291	0.627552	0.689646	0.468558	0.177348	0.764112	0.803772	0.42186
CYP1A2	-0.253657	-0.374333	-0.790183	-0.325919	-0.178352	-0.63526	-0.628097	-0.211168	-0.591262	-0.670181	-0.693217	-0.636996	-0.536354	-0.741879	-0.598803	-0.111401	-0.408546	-0.284059	-0.495102	-0.287006	-0.56539	-0.454517	-0.290434	-0.6181	-0.67124	-0.437009	-0.521062	-0.55857	-0.489437	-0.435	-0.433743	-0.174325	-0.323059	-0.422723	0.113385	-0.617168	-0.405452	-0.627851	-0.492832	0.028503	-0.199869	-0.0438456	-0.218988	-0.764091	-0.713923	-0.464009	-0.615081	-0.688581	-0.0345924
CX3CR1	0.842512	0.674308	0.769288	0.25068	0.913576	0.395746	-0.0886759	0.246875	0.503644	0.760924	0.178898	0.30478	0.685998	0.313837	0.526155	-0.0530889	0.782318	0.741228	0.198395	0.32305	-0.197472	0.942149	0.882707	0.368115	0.88019	0.966275	0.612818	0.491307	0.881905	0.00304959	0.312691	0.474394	0.662644	0.946965	0.553267	0.41246	-0.202923	-0.221481	0.427192	0.657029	0.557619	0.754693	0.0779043	0.49825	-0.145166	0.344622	0.467612	0.638143	-0.00203972
ALOX5AP	0.0534495	0.4177	0.333829	0.64581	0.43127	0.328224	0.0909887	0.854863	0.446695	0.121397	0.395988	0.639038	0.63108	0.699087	0.351032	0.696763	0.223052	0.130227	0.0155112	0.252902	0.11003	0.371743	0.153617	0.0305242	0.439791	0.292806	0.536889	0.780901	0.37585	0.575308	0.340327	0.437379	0.567017	0.246318	0.580539	0.40952	0.538718	0.212496	0.514867	-0.00740038	-0.139527	0.265554	0.796017	0.155777	0.535389	0.114313	0.303746	0.38177	0.396438
MAT1A	-0.0565465	-0.194108	-0.0103385	-0.543879	-0.245176	0.00986209	-0.421028	0.000140335	0.0689117	-0.357765	0.338652	0.349358	0.362028	0.066601	-0.0244598	0.507754	-0.452468	-0.237682	-0.363687	-0.0713823	0.0654125	-0.176073	-0.309975	-0.427404	0.0206832	-0.174456	0.517177	0.240831	-0.238972	-0.0733168	-0.405439	0.396986	0.0773851	-0.0649462	-0.344595	0.356802	0.228741	0.0835221	0.699457	-0.616163	-0.710022	-0.192988	0.445511	0.333555	0.391845	-0.816475	0.461906	0.261942	0.804466
NRXN2	0.395901	0.484136	0.5865	0.542255	0.322387	0.549728	0.54506	0.383431	0.509439	0.790717	-0.128167	-0.0267144	0.410409	0.424018	0.602603	-0.268765	0.681854	0.510099	0.805971	0.356513	-0.0770899	0.71566	0.501772	0.858135	0.574753	0.551014	0.267494	0.461958	0.551662	0.487236	0.788673	-0.278496	0.581944	0.532458	0.366675	0.538543	0.380109	-0.0298618	0.139718	0.412342	0.4384	0.333088	-0.0760958	0.295148	0.342717	0.702964	0.400124	0.676278	-0.0857604
FLT3	0.85107	0.721983	0.801253	0.194992	0.842966	0.356606	-0.152039	0.241467	0.475072	0.705739	0.279788	0.431974	0.752078	0.365439	0.6157	0.135917	0.694527	0.740237	0.162526	0.236298	-0.119291	0.911217	0.844904	0.330299	0.935294	0.949493	0.708257	0.604208	0.881617	0.138691	0.297617	0.502577	0.748285	0.893789	0.528191	0.492266	-0.122261	-0.0969619	0.605333	0.520202	0.434246	0.614518	0.257319	0.619018	0.0522057	0.217871	0.553419	0.728139	0.126927
WWC1	-0.126048	0.00158207	0.42187	0.346927	-0.0410811	0.801089	0.746724	0.638264	0.713321	0.29019	0.350332	0.37772	0.542263	0.686178	0.355876	0.145501	-0.0272064	-0.0413408	0.641229	0.356325	0.45224	0.182478	-0.137754	0.520948	0.143709	-0.0377865	0.431101	0.596012	-0.121195	0.29687	0.527794	0.107295	0.247885	0.210584	-0.180344	0.815288	0.920313	0.372921	0.474659	-0.164418	-0.193616	0.0735568	0.264786	0.417519	0.692504	0.200729	0.693608	0.57186	0.463673
CBLN2	0.704012	0.775967	0.625033	0.466888	0.632141	0.319473	0.0767714	0.458225	0.378426	0.642046	-0.123837	0.160126	0.603317	0.330754	0.758626	0.159879	0.58578	0.759127	0.558162	0.0957349	-0.168152	0.835392	0.730953	0.603941	0.725976	0.744675	0.451709	0.708553	0.686166	0.540338	0.720574	0.0319914	0.930926	0.654424	0.716727	0.568251	0.25957	-0.102461	0.474487	0.565567	0.419418	0.379846	0.330398	0.408702	0.272996	0.382516	0.459399	0.74491	0.11167
MTTP	-0.105312	-0.224061	-0.0807005	-0.526825	-0.268586	-0.0418433	-0.48795	0.0129931	0.0350454	-0.386041	0.276632	0.288581	0.330609	0.041142	-0.0919585	0.487436	-0.403777	-0.287171	-0.434465	-0.0222	-0.055317	-0.177705	-0.339028	-0.484802	0.0112065	-0.183233	0.500539	0.193897	-0.212243	-0.0584046	-0.449802	0.355289	0.0573142	-0.0982307	-0.297818	0.281611	0.189176	-0.00810595	0.633901	-0.656117	-0.752005	-0.163501	0.42597	0.22179	0.362502	-0.820107	0.382712	0.217122	0.806116
PRR11	0.467122	0.346609	0.674622	0.153892	0.66403	0.662913	-0.0234508	0.620483	0.774431	0.43232	0.472638	0.597541	0.965479	0.602295	0.381828	0.315616	0.369863	0.327244	0.0786804	0.479253	-0.0113523	0.690551	0.411631	0.120481	0.6805	0.607244	0.926589	0.732539	0.482074	-0.0215488	0.16304	0.764072	0.580536	0.7922	0.265969	0.755868	0.328272	-0.0826243	0.81124	0.138321	-0.0616038	0.681907	0.430589	0.556421	0.238939	-0.0862503	0.799431	0.732091	0.636295
EPHA3	-0.296371	-0.18781	-0.469817	0.113968	-0.129376	-0.351349	-0.402783	0.0554642	-0.250241	-0.190269	-0.442145	-0.431077	-0.255378	-0.214836	-0.435855	-0.167229	0.28058	-0.28838	-0.418117	0.262793	-0.745088	-0.0339985	-0.166027	-0.346874	-0.113528	-0.0735392	-0.182072	-0.336258	0.130506	0.0540345	-0.258213	-0.286019	-0.148934	-0.221554	0.305611	-0.512515	-0.27994	-0.585295	-0.474579	-0.176155	-0.199726	0.180784	-0.166937	-0.732636	-0.261158	0.00587373	-0.543809	-0.337024	-0.0590126
GDA	0.563602	0.764205	0.772087	0.616975	0.727409	0.526539	0.249577	0.721081	0.601872	0.557494	0.403479	0.675026	0.822244	0.710405	0.773749	0.527522	0.434565	0.621606	0.427967	0.160923	0.257359	0.742572	0.611765	0.47135	0.767899	0.683459	0.662997	0.959927	0.636429	0.567667	0.657194	0.45319	0.8754	0.65476	0.631706	0.713517	0.486075	0.291401	0.720878	0.411858	0.285894	0.375753	0.680693	0.61085	0.510873	0.3314	0.624835	0.753727	0.25819
E2F2	0.252685	0.179958	0.494373	0.179504	0.614748	0.5912	-0.119624	0.68202	0.737633	0.26595	0.508698	0.598944	0.893142	0.607092	0.132719	0.344104	0.347345	0.101503	-0.180769	0.592675	-0.112469	0.5613	0.244713	-0.124532	0.56366	0.485446	0.888444	0.611381	0.423559	-0.111562	-0.0423526	0.840944	0.394028	0.671055	0.260787	0.565798	0.260923	-0.16769	0.673226	-0.00574141	-0.207204	0.74249	0.433059	0.322513	0.14588	-0.152523	0.623709	0.523774	0.654367
ADH4	-0.0551734	-0.250128	0.400137	-0.00962624	0.253034	0.839239	0.216228	0.570991	0.883848	0.246436	0.523549	0.427059	0.771499	0.605103	-0.0962286	-0.0150621	0.191453	-0.220013	-0.0178272	0.785632	0.00525506	0.332571	-0.093009	-0.0241599	0.286662	0.174673	0.798316	0.364341	0.0699352	-0.383255	-0.125352	0.690655	0.00370056	0.548843	-0.260643	0.65309	0.426163	-0.147244	0.518044	-0.255956	-0.375983	0.68003	0.0636855	0.289601	0.165742	-0.150722	0.722236	0.469655	0.709823
BPI	0.227895	0.257899	0.544959	0.248191	0.476601	0.652309	0.0662769	0.776709	0.751366	0.243506	0.519438	0.674321	0.932068	0.702754	0.349374	0.519909	0.169756	0.146968	0.0771847	0.431707	0.109643	0.500026	0.177246	0.0596063	0.525247	0.378475	0.884162	0.814132	0.291781	0.157209	0.19824	0.709434	0.548818	0.564437	0.232011	0.782557	0.580858	0.0700707	0.842427	-0.0688639	-0.272192	0.491327	0.625534	0.478409	0.46864	-0.156721	0.772663	0.671847	0.757427
SVEP1	0.811176	0.815401	0.693032	0.411847	0.596188	0.241694	0.194889	0.101524	0.250565	0.848646	-0.177722	0.000722488	0.371717	0.187181	0.787436	-0.172618	0.757766	0.877703	0.674629	0.0376042	-0.124311	0.864632	0.875299	0.798131	0.7768	0.840648	0.237291	0.460968	0.810837	0.477217	0.742799	-0.189711	0.791691	0.672863	0.602911	0.387772	-0.0233583	-0.0489249	0.214702	0.721008	0.730155	0.311314	-0.00943054	0.455493	0.124116	0.644642	0.312544	0.678633	-0.289587
IL10	0.822793	0.9357	0.810575	0.488501	0.728249	0.302575	0.138953	0.348566	0.358114	0.718074	0.171613	0.436217	0.628804	0.436944	0.910584	0.307076	0.581268	0.878648	0.535187	-0.041117	0.138466	0.843898	0.85227	0.637077	0.870291	0.849754	0.485644	0.793831	0.807265	0.607887	0.721087	0.177221	0.951563	0.691221	0.683982	0.567118	0.179398	0.21893	0.582824	0.618265	0.566425	0.266371	0.456874	0.665887	0.369843	0.449729	0.499292	0.774151	-0.0346916
C1QB	0.633518	0.828821	0.782478	0.657047	0.715324	0.481954	0.280837	0.625716	0.543013	0.688671	0.237449	0.50382	0.731758	0.630376	0.824297	0.350676	0.591408	0.716735	0.546355	0.166887	0.137368	0.831303	0.71093	0.619108	0.820786	0.764768	0.56506	0.880803	0.744013	0.63565	0.757097	0.245406	0.911759	0.678593	0.694535	0.651135	0.399696	0.204756	0.582889	0.512784	0.427664	0.379353	0.525339	0.558705	0.463547	0.49238	0.543427	0.776302	0.100559
C1QC	0.637271	0.817621	0.777507	0.635703	0.712078	0.48669	0.262288	0.627623	0.549737	0.683653	0.223366	0.490813	0.744092	0.620577	0.817204	0.344951	0.587505	0.712624	0.541771	0.176112	0.113442	0.836414	0.706312	0.610543	0.818945	0.764152	0.580577	0.880335	0.736819	0.620028	0.747092	0.249642	0.916602	0.687335	0.688813	0.664188	0.402644	0.177538	0.596228	0.503929	0.408369	0.391712	0.52024	0.556534	0.457469	0.467953	0.558655	0.787413	0.129528
SGCG	0.54659	0.735131	0.476545	0.596392	0.412716	0.179344	0.293785	0.296823	0.172708	0.653445	-0.307812	-0.0695306	0.252438	0.219315	0.726378	-0.0423292	0.600579	0.711078	0.725042	-0.0116075	-0.117068	0.680868	0.652275	0.774239	0.557517	0.593092	0.0770633	0.492327	0.611438	0.692546	0.853893	-0.372542	0.773182	0.407663	0.679519	0.336688	0.22058	-0.00448253	0.105388	0.60043	0.579331	0.14593	0.123975	0.224451	0.272484	0.660534	0.169023	0.549972	-0.250612
C1QA	0.613219	0.811835	0.767774	0.627445	0.724696	0.472203	0.221696	0.661946	0.548366	0.616286	0.302131	0.579582	0.774597	0.651916	0.801649	0.451633	0.523367	0.679834	0.463912	0.152324	0.163754	0.796013	0.673316	0.527681	0.807985	0.737994	0.617581	0.919034	0.710832	0.616159	0.695779	0.341997	0.9122	0.664534	0.688047	0.666048	0.41968	0.226711	0.65607	0.460017	0.351203	0.374666	0.614395	0.574599	0.483192	0.395486	0.569844	0.765972	0.183755
CSF2RB	0.483194	0.775884	0.478283	0.534068	0.615983	0.0479882	-0.123971	0.50973	0.17584	0.267689	0.282396	0.59044	0.53662	0.453513	0.627993	0.699803	0.321147	0.547414	0.0671898	-0.103346	0.112347	0.530905	0.540605	0.146772	0.64569	0.573445	0.437885	0.771076	0.628156	0.66122	0.425208	0.34909	0.799695	0.361194	0.766945	0.306254	0.195211	0.25576	0.551831	0.319699	0.218982	0.144897	0.785134	0.366848	0.403882	0.165286	0.237516	0.448074	0.116364
PET117	-0.0296501	-0.0768497	0.482076	0.201432	0.107975	0.90824	0.578196	0.637053	0.864733	0.372507	0.365672	0.347124	0.702499	0.667488	0.230526	-0.00300414	0.131444	-0.0521615	0.487684	0.591209	0.221189	0.340895	-0.0622717	0.40775	0.257223	0.112688	0.634216	0.538433	-0.00681366	0.0139934	0.341895	0.311318	0.214845	0.443437	-0.20921	0.851651	0.764469	0.0968354	0.528003	-0.152011	-0.235248	0.390167	0.124362	0.410955	0.485475	0.0990248	0.798534	0.638745	0.601176
ALDH8A1	0.133484	-0.216015	0.447827	-0.210029	0.313348	0.763565	0.0894059	0.330644	0.804262	0.31554	0.455774	0.328211	0.727966	0.424312	-0.078818	-0.162271	0.227513	-0.0896269	-0.0342836	0.704205	-0.0559961	0.391647	0.0474855	-0.0139966	0.335524	0.282221	0.778584	0.246749	0.125811	-0.555455	-0.202917	0.694061	-0.0044193	0.653724	-0.316898	0.610804	0.19711	-0.239618	0.509561	-0.133426	-0.247719	0.712229	-0.0995792	0.378753	-0.0200126	-0.198932	0.735441	0.484506	0.625961
NLRP3	0.656837	0.805425	0.910233	0.606568	0.816118	0.567814	0.347817	0.557271	0.626129	0.717721	0.548431	0.738843	0.781727	0.730533	0.793486	0.38196	0.561534	0.698194	0.439772	0.18552	0.383648	0.798339	0.736072	0.551064	0.868269	0.80234	0.633741	0.869616	0.762481	0.459242	0.624481	0.506716	0.774924	0.755694	0.545489	0.646371	0.304883	0.397018	0.639132	0.522837	0.494384	0.422565	0.528298	0.729757	0.412423	0.493797	0.606161	0.734	0.0337204
GCSAML	0.0835991	0.48827	0.140771	0.467375	0.280362	-0.0822376	-0.131189	0.575576	0.0249173	-0.159943	0.292798	0.596079	0.360151	0.409836	0.397659	0.916763	-0.11013	0.185899	-0.0936232	-0.234897	0.239273	0.105686	0.110893	-0.118706	0.252736	0.124287	0.279862	0.693844	0.19777	0.676363	0.271238	0.309178	0.573668	-0.0440202	0.586261	0.207695	0.402024	0.379227	0.505674	-0.0121282	-0.139308	-0.146011	0.943485	0.163273	0.528066	-0.0999113	0.107003	0.188774	0.282429
FIBIN	-0.0407378	-0.205188	0.387268	0.0735777	0.334999	0.768624	0.10155	0.570077	0.859698	0.317547	0.4941	0.389654	0.758892	0.611246	-0.162393	-0.0754982	0.420621	-0.216355	-0.157263	0.913693	-0.196679	0.440498	-0.0145294	-0.0862595	0.407664	0.303	0.813961	0.301117	0.280539	-0.352927	-0.195202	0.679109	0.00242905	0.597399	-0.117264	0.499073	0.256309	-0.284975	0.400701	-0.238269	-0.32691	0.813811	0.0138114	0.156621	0.0801598	-0.0540757	0.581598	0.426933	0.616062
CES3	-0.0707653	-0.371184	0.247123	-0.241683	0.116504	0.707301	0.0262815	0.41734	0.752105	0.122738	0.340024	0.231246	0.680019	0.388174	-0.202961	-0.0948649	0.0857909	-0.281149	-0.0988221	0.72067	-0.17027	0.245649	-0.175165	-0.133177	0.16921	0.08103	0.748695	0.220105	-0.05172	-0.500775	-0.258382	0.595508	-0.052416	0.472576	-0.35039	0.594719	0.33684	-0.32728	0.49236	-0.341259	-0.498281	0.623956	-0.0407617	0.202355	0.0651002	-0.351581	0.686018	0.420347	0.80148
CCL26	-0.133366	0.211955	0.265009	0.540946	0.167998	0.482219	0.385049	0.885833	0.501905	-0.0378566	0.411774	0.629402	0.577237	0.70587	0.359976	0.717865	-0.184541	-0.0142328	0.271553	0.115663	0.438063	0.101716	-0.114346	0.14037	0.127873	-0.0457041	0.438036	0.808532	-0.074654	0.517743	0.449473	0.363211	0.447993	0.0672249	0.257558	0.629768	0.892647	0.432417	0.596234	-0.130798	-0.290294	0.0157532	0.800321	0.264146	0.700207	-0.00418598	0.481067	0.381874	0.542903
CCL24	-0.167259	-0.104304	0.197795	0.188591	0.283235	0.526544	-0.0498846	0.783998	0.650459	-0.0739629	0.533403	0.599216	0.735423	0.63278	-0.0931667	0.494056	0.0282209	-0.26873	-0.298458	0.563631	-0.012355	0.194615	-0.171123	-0.322469	0.227628	0.0784488	0.749264	0.535606	0.0665192	-0.0567818	-0.156309	0.762335	0.161504	0.299865	0.0901202	0.474802	0.484875	-0.0532893	0.582835	-0.342987	-0.537712	0.504355	0.543223	0.101839	0.302351	-0.309953	0.491851	0.298157	0.783774
CPZ	0.0933736	0.378648	0.336166	0.710317	0.177797	0.43905	0.559503	0.591057	0.408283	0.503875	-0.152776	0.00428116	0.297948	0.471936	0.468447	-0.0356659	0.472254	0.285232	0.693679	0.296187	-0.0349338	0.474239	0.244533	0.682916	0.336984	0.280882	0.131132	0.48647	0.34136	0.645056	0.778607	-0.321602	0.50777	0.2405	0.446699	0.418731	0.566607	0.0469853	0.0498984	0.25038	0.238669	0.181225	0.136614	0.0449745	0.451194	0.638221	0.213907	0.463641	-0.0269984
ANXA9	-0.27268	-0.0756843	0.211238	0.449466	-0.214648	0.631385	0.823055	0.499604	0.51076	0.299825	0.0471453	0.0348698	0.209465	0.50967	0.228244	-0.135947	0.0879613	-0.110373	0.712185	0.355901	0.270107	0.096011	-0.196401	0.610743	-0.00696514	-0.139206	0.090803	0.318782	-0.136492	0.371033	0.585252	-0.293013	0.0934908	0.0190101	-0.140347	0.525646	0.790751	0.24539	0.0518802	-0.120835	-0.0696103	-0.0131037	-0.013127	0.100816	0.564294	0.440097	0.354435	0.358321	0.149392
LIF	-0.0247405	0.405553	0.108695	0.519665	0.200637	0.0182337	-0.0224043	0.683992	0.10865	-0.165353	0.256925	0.554486	0.382681	0.472471	0.366755	0.880299	-0.125486	0.0989019	-0.0109404	-0.141229	0.223128	0.0841496	0.0117712	-0.0681142	0.193625	0.0447493	0.289405	0.714623	0.119158	0.704251	0.32832	0.249451	0.551547	-0.0757184	0.544487	0.280808	0.553078	0.354792	0.490861	-0.0843748	-0.223639	-0.13323	0.924551	0.107578	0.602103	-0.0758676	0.148027	0.215788	0.361267
CYP2B6	-0.343774	-0.380879	0.132972	0.15978	0.00406757	0.754373	0.495033	0.628726	0.716201	0.0407232	0.305795	0.232319	0.451854	0.513531	-0.167649	-0.0416662	-0.0857188	-0.363988	0.195435	0.592983	0.174418	0.0205232	-0.33375	0.0724359	-0.114191	-0.189934	0.39214	0.256053	-0.298457	-0.260931	0.0684151	0.372299	-0.145717	0.197464	-0.298165	0.533406	0.644506	-0.0092662	0.230728	-0.237952	-0.359074	0.396658	0.0238866	0.0485408	0.195026	-0.0214133	0.493178	0.209335	0.529927
TNIK	0.203536	0.252095	0.690199	0.337886	0.320498	0.806179	0.353249	0.649397	0.855274	0.581282	0.50356	0.544574	0.877725	0.812147	0.42732	0.173062	0.503293	0.156183	0.331228	0.655954	0.0635568	0.6452	0.217743	0.399691	0.700518	0.485902	0.862132	0.716308	0.49748	0.310806	0.345424	0.385028	0.491087	0.614807	0.100282	0.808629	0.584955	0.10114	0.672981	-0.132389	-0.147675	0.48277	0.329771	0.520681	0.631836	0.198061	0.783911	0.828862	0.560801
NEXMIF	-0.0941383	-0.0325832	0.378282	0.358858	0.0923865	0.814414	0.511077	0.744443	0.801558	0.359688	0.202768	0.237513	0.657126	0.664495	0.204721	0.0123128	0.25704	-0.0730713	0.457862	0.648813	0.00899691	0.386497	-0.0681253	0.394173	0.274327	0.127305	0.582138	0.540869	0.0863128	0.193538	0.400464	0.162229	0.288423	0.377233	-0.00533099	0.747163	0.773415	-0.0367583	0.413451	-0.165656	-0.261476	0.415564	0.161708	0.201839	0.509999	0.179997	0.645207	0.601331	0.575215
LRRN1	-0.0747258	0.226394	0.125504	0.355978	0.292921	0.148777	-0.0912121	0.724478	0.260485	-0.271947	0.495737	0.72772	0.517126	0.527359	0.182653	0.920789	-0.250633	-0.04537	-0.234716	-0.0206936	0.3084	0.0159965	-0.0783267	-0.303633	0.136286	-0.0017391	0.45467	0.68992	0.00326119	0.350853	0.0666567	0.628347	0.378584	0.0210474	0.362062	0.330228	0.511457	0.33657	0.60963	-0.16335	-0.356639	0.0429661	0.930921	0.170976	0.455945	-0.289822	0.275883	0.15534	0.538615
GDAP1L1	-0.0260315	-0.173168	0.0327083	-0.546779	-0.227521	0.0412542	-0.374415	-0.00769878	0.088612	-0.33559	0.3718	0.3816	0.376194	0.0812067	0.0170359	0.513142	-0.475919	-0.204227	-0.315514	-0.100388	0.138127	-0.172651	-0.287985	-0.386511	0.0261765	-0.166699	0.520192	0.26613	-0.251974	-0.0813989	-0.372797	0.416938	0.0885567	-0.0437549	-0.368366	0.397731	0.249712	0.138242	0.729787	-0.583305	-0.674632	-0.208307	0.451283	0.397106	0.404335	-0.803003	0.503826	0.28566	0.792367
NAALAD2	-0.290097	-0.437123	-0.788187	-0.481143	-0.26808	-0.623872	-0.778532	-0.187272	-0.549723	-0.768282	-0.570156	-0.513249	-0.394495	-0.684675	-0.613109	0.0594899	-0.503711	-0.382184	-0.637525	-0.257152	-0.588205	-0.485401	-0.39895	-0.764739	-0.623742	-0.473598	-0.31562	-0.468464	-0.519839	-0.419661	-0.576402	-0.0528336	-0.287584	-0.439342	0.0180513	-0.502383	-0.325081	-0.619423	-0.260199	-0.217022	-0.463649	-0.087404	-0.0617725	-0.67297	-0.547756	-0.719438	-0.466538	-0.58051	0.250123
HPGDS	-0.0546115	0.0767604	0.0916731	0.175726	0.353486	0.176535	-0.327793	0.659919	0.341693	-0.227964	0.4502	0.608228	0.595363	0.450637	-0.0393022	0.710908	-0.0563054	-0.139353	-0.474802	0.253358	-0.03907	0.13198	-0.0656879	-0.48208	0.218343	0.108625	0.610102	0.524692	0.124408	0.0652393	-0.204756	0.74815	0.268426	0.181035	0.312682	0.255475	0.280771	-0.0189335	0.563575	-0.237046	-0.454815	0.342437	0.720463	0.048953	0.220554	-0.404754	0.276902	0.153083	0.651951
APOA5	-0.324121	-0.294235	-0.702593	-0.032705	-0.156905	-0.54763	-0.548346	-0.0604389	-0.460065	-0.423167	-0.663442	-0.629949	-0.45968	-0.505922	-0.58743	-0.208199	0.0389283	-0.319303	-0.500758	0.055237	-0.796264	-0.224995	-0.230709	-0.503768	-0.397832	-0.244725	-0.4124	-0.518091	-0.120854	-0.16144	-0.356067	-0.313281	-0.262939	-0.350448	0.29446	-0.67854	-0.405358	-0.714463	-0.618786	-0.064711	-0.181929	0.12111	-0.254047	-0.901127	-0.549651	-0.153597	-0.707446	-0.58147	-0.117897
IRX1	-0.139417	0.215512	0.0160188	0.312464	-0.0145003	0.0410728	0.186648	0.532105	0.0302691	-0.369819	0.29109	0.539873	0.214104	0.343792	0.340344	0.877055	-0.592937	0.0060449	0.151601	-0.420306	0.616013	-0.25089	-0.195847	-0.0348547	-0.161755	-0.286132	0.0845459	0.625811	-0.346445	0.516116	0.336922	0.226043	0.350401	-0.271502	0.18862	0.362758	0.704698	0.612072	0.504932	-0.10977	-0.258258	-0.427408	0.868112	0.240178	0.598679	-0.225583	0.228795	0.0900826	0.358164
APOC3	0.0155681	-0.176821	0.4727	-0.00688787	0.252948	0.872266	0.270596	0.570428	0.900384	0.296196	0.523468	0.451251	0.810655	0.625085	0.024862	0.0172495	0.170012	-0.136074	0.101551	0.721413	0.0769825	0.368564	-0.0460264	0.0799869	0.326812	0.202725	0.82046	0.446109	0.0738868	-0.306344	-0.022272	0.655627	0.0968172	0.575046	-0.259052	0.754394	0.500615	-0.0765081	0.602696	-0.221784	-0.342806	0.620687	0.106949	0.398617	0.254397	-0.136201	0.809325	0.566951	0.728081
KCNT2	0.210551	-0.0406385	0.499855	0.0592799	0.584973	0.693865	0.0406703	0.40855	0.791422	0.444947	0.487686	0.38383	0.711736	0.494277	-0.0958435	-0.177553	0.535199	0.0153569	-0.16499	0.808313	-0.168018	0.559553	0.254277	-0.0449803	0.505773	0.503872	0.739792	0.233733	0.436821	-0.497602	-0.191096	0.768985	0.0309203	0.762007	-0.0133158	0.389201	-0.0267301	-0.301218	0.325629	0.0780794	-0.00693462	0.921694	-0.0972912	0.239425	-0.189072	0.0623163	0.51355	0.376272	0.359125
IRX2	-0.0755428	0.29027	0.0509813	0.415525	0.1731	0.0576343	0.107151	0.652109	0.0898395	-0.329577	0.300217	0.585199	0.30209	0.391382	0.32403	0.909876	-0.46576	0.0589044	0.0653578	-0.330052	0.512229	-0.131773	-0.0921165	-0.0937392	-0.0719319	-0.162192	0.155825	0.67846	-0.214312	0.488611	0.326143	0.35573	0.417158	-0.155471	0.36074	0.332784	0.640489	0.507003	0.504146	-0.00471525	-0.201709	-0.241433	0.915204	0.182315	0.495706	-0.185394	0.201924	0.0848298	0.355833
RETN	0.90101	0.795993	0.735075	0.274586	0.654197	0.229479	0.139751	-0.0455923	0.235336	0.874575	-0.130198	0.00287708	0.356123	0.106931	0.754709	-0.256914	0.753037	0.91871	0.617054	0.0113886	-0.0961089	0.87003	0.938571	0.760493	0.789962	0.889884	0.240849	0.373596	0.820295	0.294095	0.638739	-0.0982838	0.720027	0.747453	0.513202	0.354058	-0.179853	-0.0643535	0.21263	0.784328	0.804522	0.357142	-0.113953	0.531555	-0.0200004	0.602036	0.331565	0.652104	-0.344631
DUSP26	0.256252	0.0857982	0.604151	0.131967	0.540938	0.82679	0.152828	0.640284	0.90404	0.432155	0.495761	0.510112	0.915108	0.64449	0.172301	0.0885208	0.372064	0.106908	0.0909306	0.699877	-0.0183841	0.598676	0.230549	0.119176	0.540109	0.466237	0.889519	0.572678	0.341258	-0.220822	0.0762607	0.746279	0.322627	0.761474	0.0434363	0.74061	0.377295	-0.146197	0.652007	0.0247241	-0.140964	0.777343	0.20412	0.438789	0.166786	-0.0303335	0.79209	0.643669	0.640208
C11orf86	-0.127469	-0.215798	0.350785	0.148791	0.173905	0.861315	0.422087	0.68181	0.857523	0.215369	0.399925	0.360426	0.69057	0.621048	0.000335913	0.0182194	0.0775346	-0.196302	0.22308	0.670775	0.1259	0.258245	-0.146475	0.142875	0.152021	0.0493886	0.642305	0.43566	-0.0753228	-0.211906	0.11549	0.507799	0.0647642	0.429367	-0.208586	0.713778	0.645255	-0.0390578	0.461143	-0.186871	-0.328237	0.534776	0.114988	0.249012	0.275641	-0.0357025	0.698641	0.456393	0.654182
FCER2	0.918709	0.843423	0.658679	0.29824	0.723765	0.0860632	-0.00645851	-0.0513972	0.124221	0.792025	-0.172726	-0.00252083	0.302891	0.0359571	0.711186	-0.179298	0.749152	0.937461	0.48043	-0.0585662	-0.166253	0.851015	0.973975	0.636669	0.77374	0.906181	0.187074	0.345887	0.856061	0.29706	0.577111	-0.0600927	0.734346	0.711473	0.642846	0.219061	-0.29472	-0.115268	0.162274	0.83768	0.829809	0.367384	-0.0526589	0.435846	-0.120625	0.56553	0.200993	0.544581	-0.397989
CLEC4G	-0.168277	0.25513	-0.0199594	0.53583	0.201502	0.0385681	-0.0285971	0.775694	0.135797	-0.28797	0.236838	0.516851	0.346599	0.457858	0.181455	0.853102	-0.195786	-0.0488948	-0.117386	-0.0580224	0.177615	-0.0122726	-0.107812	-0.204874	0.0415283	-0.0718374	0.243397	0.633974	-0.00995122	0.549608	0.229062	0.330814	0.411547	-0.124044	0.521389	0.205774	0.559675	0.260805	0.389804	-0.109592	-0.298592	-0.038201	0.884175	-0.0586469	0.466488	-0.123445	0.0717643	0.0646678	0.394937
CDKL5	0.506412	0.39756	0.728655	0.275534	0.392696	0.741059	0.427207	0.39323	0.721009	0.809918	0.0446367	0.110723	0.686222	0.478465	0.591479	-0.240459	0.623027	0.495113	0.721055	0.480433	-0.0805543	0.800779	0.50346	0.761144	0.673735	0.623366	0.59197	0.554389	0.526588	0.232094	0.621463	0.0258624	0.606362	0.74644	0.180254	0.792664	0.413375	-0.108136	0.455737	0.306039	0.263236	0.499368	-0.0521779	0.524647	0.341813	0.425408	0.732279	0.876666	0.251467
SLPI	-0.303755	-0.209124	-0.541323	0.104129	-0.12413	-0.412343	-0.424068	0.0220935	-0.317775	-0.238914	-0.530587	-0.513502	-0.338589	-0.305656	-0.482517	-0.210536	0.23909	-0.285964	-0.424533	0.208685	-0.770434	-0.0797207	-0.168142	-0.370602	-0.198776	-0.113918	-0.281367	-0.406488	0.0723007	-0.00410771	-0.26521	-0.319851	-0.188092	-0.257325	0.325314	-0.5865	-0.332487	-0.633079	-0.562017	-0.108907	-0.154514	0.176299	-0.220055	-0.807909	-0.370763	0.00738412	-0.623556	-0.426789	-0.124056
SLC6A3	0.338606	0.0165634	0.551883	-0.0144219	0.387665	0.795884	0.280096	0.334482	0.789313	0.587122	0.122395	0.0693133	0.666617	0.353481	0.179288	-0.383831	0.439789	0.208465	0.395039	0.641631	-0.152457	0.61121	0.293913	0.402573	0.425409	0.444379	0.623566	0.296383	0.264208	-0.339558	0.206227	0.338406	0.235015	0.759766	-0.10115	0.687045	0.250831	-0.322704	0.379433	0.193923	0.0749931	0.719316	-0.253975	0.380068	-0.0267796	0.138306	0.721908	0.635208	0.39984
RAB38	0.0938105	0.327028	0.494306	0.442022	0.45652	0.526362	0.17943	0.814266	0.617518	0.10398	0.714777	0.89133	0.794101	0.800501	0.372708	0.773061	0.0203981	0.0972467	0.0079617	0.238862	0.424868	0.306956	0.104945	-0.00780506	0.434233	0.25426	0.717413	0.859581	0.23161	0.337752	0.228024	0.746106	0.479936	0.349474	0.286094	0.628538	0.619395	0.419007	0.773268	-0.0790103	-0.214812	0.263157	0.844682	0.468265	0.582978	-0.0663318	0.592171	0.475884	0.565449
UGT1A1	-0.130586	-0.324964	-0.617524	-0.450285	-0.14742	-0.508013	-0.509625	-0.254254	-0.505956	-0.654763	-0.498905	-0.443114	-0.420807	-0.685445	-0.42985	0.00389152	-0.614025	-0.181795	-0.354552	-0.443953	-0.233886	-0.485667	-0.254937	-0.527029	-0.663328	-0.447187	-0.428105	-0.414469	-0.60955	-0.499925	-0.371026	-0.0139265	-0.267215	-0.349863	-0.0570008	-0.380967	-0.278785	-0.378498	-0.238527	0.0680199	-0.173231	-0.152001	-0.116847	-0.43189	-0.606307	-0.567181	-0.354788	-0.552058	0.0568364
ABI3BP	0.272163	0.521331	0.36337	0.655757	0.347875	0.289608	0.239948	0.550501	0.33376	0.520279	-0.178978	0.0296217	0.380265	0.40275	0.488305	0.0536493	0.616537	0.405032	0.481295	0.288175	-0.254693	0.624591	0.413316	0.535056	0.519243	0.482041	0.251993	0.515809	0.570172	0.650266	0.661796	-0.207789	0.649774	0.357243	0.647488	0.335394	0.348977	-0.116872	0.13068	0.305681	0.255208	0.302292	0.222217	0.0355137	0.350029	0.537195	0.172613	0.500481	0.0101979
GXYLT2	0.35299	0.646078	0.437856	0.735397	0.408446	0.295773	0.341664	0.569709	0.317237	0.55135	-0.154965	0.0973606	0.377408	0.427597	0.633592	0.132925	0.558612	0.528826	0.617284	0.147757	-0.0846542	0.631454	0.493309	0.647917	0.526118	0.50233	0.199848	0.612856	0.55815	0.741237	0.811034	-0.21551	0.742241	0.362701	0.703252	0.39399	0.41493	0.0353107	0.176366	0.434167	0.379076	0.217621	0.306174	0.144062	0.40205	0.610729	0.205005	0.531071	-0.068903
TTR	-0.214045	0.033609	0.313243	0.448955	0.0528148	0.687776	0.531719	0.85752	0.674717	0.073218	0.441028	0.556534	0.627023	0.764377	0.27862	0.483815	-0.112625	-0.131183	0.360463	0.33906	0.402063	0.126693	-0.206753	0.233627	0.128816	-0.0753075	0.519797	0.725946	-0.11552	0.379301	0.411017	0.322952	0.314658	0.134824	0.0239899	0.740595	0.955962	0.363004	0.574654	-0.254011	-0.368149	0.107791	0.584231	0.293315	0.724716	0.0287188	0.611856	0.472048	0.62184
FCN1	0.897443	0.825063	0.678434	0.293244	0.674311	0.121572	0.0298008	-0.0573723	0.153565	0.82675	-0.158467	-0.00588045	0.316993	0.068354	0.721203	-0.207127	0.778609	0.915385	0.510349	-0.015378	-0.171284	0.862754	0.951515	0.674439	0.799413	0.905431	0.213895	0.348679	0.870672	0.329199	0.586898	-0.0996685	0.729107	0.709901	0.600768	0.250574	-0.261962	-0.104772	0.17245	0.781907	0.799726	0.353733	-0.0732977	0.454423	-0.0575848	0.582939	0.231361	0.588648	-0.376838
RGS13	-0.338943	-0.198188	-0.463801	0.165569	-0.100541	-0.336844	-0.370828	0.0872868	-0.230179	-0.202815	-0.353037	-0.355806	-0.256007	-0.158203	-0.469201	-0.13367	0.284671	-0.325539	-0.470436	0.289125	-0.684578	-0.057826	-0.182887	-0.386183	-0.11517	-0.0817112	-0.183482	-0.335527	0.140058	0.0413625	-0.289276	-0.218598	-0.198553	-0.231886	0.304637	-0.549959	-0.289622	-0.527257	-0.497223	-0.184139	-0.190403	0.198231	-0.139462	-0.742544	-0.266312	0.0372591	-0.57513	-0.387038	-0.0950373
SPP2	-0.303329	0.0134443	0.0994211	0.503993	0.0727727	0.470438	0.282421	0.915727	0.516922	-0.0986999	0.294079	0.461915	0.533783	0.659096	0.117866	0.567581	-0.0926094	-0.215678	0.112539	0.336353	0.153291	0.0754699	-0.254069	-0.00174045	0.0570786	-0.114323	0.441275	0.645987	-0.0901446	0.406451	0.284428	0.309867	0.300651	0.0230301	0.227696	0.508248	0.829478	0.169568	0.440928	-0.28106	-0.449912	0.154181	0.651332	0.00641805	0.591932	-0.0496681	0.368429	0.284956	0.616816
KCNA6	-0.292263	-0.180699	-0.431162	0.104886	-0.137279	-0.318213	-0.39998	0.0719851	-0.212955	-0.173366	-0.386528	-0.3783	-0.202942	-0.166062	-0.410295	-0.131885	0.288731	-0.293719	-0.42132	0.286788	-0.726234	-0.0150386	-0.171588	-0.343329	-0.0693007	-0.0570011	-0.118139	-0.292872	0.15324	0.0812652	-0.263103	-0.257472	-0.126372	-0.203766	0.285368	-0.463329	-0.246115	-0.555621	-0.410405	-0.224201	-0.238813	0.177225	-0.128171	-0.682057	-0.194629	-0.0149928	-0.488945	-0.283252	-0.00604679
TREH	-0.111934	-0.227769	-0.0904165	-0.523237	-0.271273	-0.0490224	-0.496263	0.0147719	0.0302023	-0.389148	0.267284	0.27938	0.325444	0.0374678	-0.101246	0.483478	-0.396016	-0.293485	-0.443441	-0.0152312	-0.0721756	-0.177533	-0.34235	-0.491783	0.00984813	-0.184054	0.497069	0.186857	-0.208005	-0.0561751	-0.455028	0.348622	0.0543615	-0.102691	-0.290566	0.270398	0.183184	-0.0209773	0.623249	-0.660257	-0.756215	-0.158984	0.422261	0.205567	0.357556	-0.818767	0.370708	0.210327	0.80453
HRH4	-0.111399	0.364498	-0.0626582	0.474853	0.0620652	-0.198887	-0.0642338	0.528629	-0.128917	-0.321142	0.160729	0.4552	0.144303	0.308159	0.303681	0.895664	-0.277328	0.0491148	-0.0613202	-0.345336	0.271352	-0.110344	-0.0740335	-0.137011	0.0190395	-0.109185	0.0550722	0.570587	-0.0129935	0.734222	0.284741	0.100871	0.445551	-0.292123	0.515038	0.0869477	0.466296	0.421926	0.336411	-0.0998446	-0.206259	-0.347841	0.900999	-0.00117551	0.551393	-0.103005	-0.0554117	0.0200172	0.210685
SLC2A2	-0.207017	-0.26877	-0.235389	-0.428441	-0.293112	-0.157462	-0.589253	0.0414445	-0.0476428	-0.4088	0.101528	0.115037	0.220677	-0.0226678	-0.238732	0.38585	-0.245509	-0.370295	-0.550697	0.0946864	-0.330004	-0.161696	-0.368832	-0.5643	-0.0120878	-0.18323	0.406053	0.0631052	-0.126413	-0.0172058	-0.502878	0.218696	0.00423635	-0.164713	-0.155813	0.0753116	0.0760552	-0.220356	0.410755	-0.675943	-0.765867	-0.0766854	0.333044	-0.0629239	0.253843	-0.737161	0.155835	0.0886605	0.720121
APOC2	-0.288631	-0.173393	-0.418197	0.114703	-0.133234	-0.307738	-0.387716	0.0764335	-0.203089	-0.15943	-0.377105	-0.369974	-0.195687	-0.153033	-0.400825	-0.13323	0.300619	-0.288516	-0.412044	0.294235	-0.719587	-0.00540417	-0.165213	-0.33092	-0.0568635	-0.0479366	-0.111577	-0.285005	0.16479	0.0904745	-0.253935	-0.257669	-0.121253	-0.196361	0.286599	-0.45588	-0.24088	-0.54696	-0.406947	-0.222567	-0.232346	0.180074	-0.127084	-0.672821	-0.184075	-0.00166267	-0.482249	-0.272946	-0.00982584
HMGCS2	-0.212575	-0.322683	-0.742307	-0.247143	-0.122683	-0.60291	-0.514947	-0.219346	-0.580219	-0.592434	-0.708286	-0.654676	-0.575206	-0.73578	-0.550606	-0.181771	-0.36524	-0.212657	-0.389003	-0.306866	-0.497556	-0.424109	-0.220353	-0.510073	-0.667983	-0.402256	-0.595043	-0.567402	-0.467005	-0.432239	-0.337917	-0.212565	-0.322554	-0.390147	0.139756	-0.626758	-0.417185	-0.58179	-0.565182	0.15581	-0.0556123	-0.0311219	-0.279527	-0.746058	-0.758888	-0.326845	-0.639389	-0.702156	-0.168104
RBM44	-0.0260315	-0.173168	0.0327083	-0.546779	-0.227521	0.0412542	-0.374415	-0.00769878	0.088612	-0.33559	0.3718	0.3816	0.376194	0.0812067	0.0170359	0.513142	-0.475919	-0.204227	-0.315514	-0.100388	0.138127	-0.172651	-0.287985	-0.386511	0.0261765	-0.166699	0.520192	0.26613	-0.251974	-0.0813989	-0.372797	0.416938	0.0885567	-0.0437549	-0.368366	0.397731	0.249712	0.138242	0.729787	-0.583305	-0.674632	-0.208307	0.451283	0.397106	0.404335	-0.803003	0.503826	0.28566	0.792367
HAO2	-0.0260315	-0.173168	0.0327083	-0.546779	-0.227521	0.0412542	-0.374415	-0.00769878	0.088612	-0.33559	0.3718	0.3816	0.376194	0.0812067	0.0170359	0.513142	-0.475919	-0.204227	-0.315514	-0.100388	0.138127	-0.172651	-0.287985	-0.386511	0.0261765	-0.166699	0.520192	0.26613	-0.251974	-0.0813989	-0.372797	0.416938	0.0885567	-0.0437549	-0.368366	0.397731	0.249712	0.138242	0.729787	-0.583305	-0.674632	-0.208307	0.451283	0.397106	0.404335	-0.803003	0.503826	0.28566	0.792367
RAMP1	0.134233	0.227735	0.408392	0.164767	0.247302	0.466265	-0.0458864	0.669556	0.56611	0.114731	0.43543	0.602824	0.814973	0.614294	0.345373	0.609737	0.0722479	0.0680666	0.0198919	0.306377	0.0519077	0.373711	0.0517455	-0.0022306	0.466524	0.258055	0.815034	0.770823	0.233315	0.334787	0.153737	0.517119	0.55327	0.357016	0.199305	0.706591	0.598004	0.100987	0.840722	-0.266325	-0.428386	0.250463	0.695347	0.418532	0.625616	-0.272343	0.683565	0.645097	0.803764
PAMR1	0.395702	0.478685	0.600005	0.536738	0.300237	0.568021	0.635941	0.345629	0.499351	0.792796	-0.115727	-0.0255453	0.366271	0.411108	0.630531	-0.291677	0.616443	0.527211	0.885106	0.292337	0.0353955	0.66887	0.495274	0.917514	0.522238	0.509143	0.204516	0.449234	0.483545	0.468912	0.834466	-0.302519	0.550694	0.508797	0.30725	0.555605	0.406652	0.0538386	0.121862	0.453037	0.492288	0.271567	-0.104433	0.342636	0.342581	0.735862	0.411539	0.658224	-0.143198
NEURL1	0.079408	0.273526	0.505123	0.385219	0.409112	0.582706	0.179662	0.812358	0.67139	0.127854	0.706997	0.862546	0.837323	0.811866	0.355214	0.72248	0.0392846	0.0610624	0.022188	0.311233	0.373	0.327926	0.0715793	0.00510747	0.450068	0.251221	0.779604	0.853589	0.224202	0.309407	0.205636	0.733269	0.470782	0.37576	0.221095	0.68769	0.651829	0.36655	0.808349	-0.147821	-0.282839	0.291653	0.801396	0.482467	0.614349	-0.103111	0.658771	0.536591	0.647997
FBLN7	0.238972	0.490936	0.423676	0.619599	0.141776	0.391858	0.578132	0.436961	0.331009	0.567171	-0.176103	-0.0044938	0.27293	0.401979	0.642532	-0.0289828	0.42251	0.436184	0.836186	0.116382	0.0717514	0.493164	0.336938	0.819319	0.387552	0.324573	0.102968	0.522951	0.351078	0.725479	0.876038	-0.419159	0.607781	0.248452	0.403695	0.493627	0.559576	0.160867	0.137981	0.309918	0.328559	0.0238142	0.140868	0.226099	0.53141	0.634303	0.291362	0.56816	-0.0754544
KIF12	-0.012092	-0.240437	0.405566	-0.0936689	0.217026	0.818564	0.179747	0.523227	0.85549	0.224626	0.498224	0.413935	0.781602	0.558581	-0.0508864	0.0111543	0.12313	-0.188759	0.0122896	0.71294	0.0205165	0.318862	-0.0926976	-0.0132509	0.277726	0.160681	0.813797	0.384361	0.0278083	-0.379549	-0.118779	0.673373	0.044988	0.542392	-0.297182	0.707189	0.446888	-0.137195	0.5914	-0.271435	-0.40605	0.61835	0.0846504	0.353233	0.198347	-0.230029	0.780462	0.516914	0.767272
FOSB	-0.21137	0.0622736	0.104104	0.207987	-0.352656	0.287503	0.414602	0.441471	0.214698	-0.086087	0.131585	0.270686	0.263925	0.405535	0.396847	0.484794	-0.360402	-0.0770491	0.48292	-0.119605	0.408439	-0.113365	-0.2974	0.315794	-0.0468276	-0.277973	0.196648	0.558716	-0.292591	0.635666	0.47058	-0.18248	0.342808	-0.22365	-0.0836049	0.598233	0.895281	0.468821	0.491055	-0.367333	-0.39835	-0.44529	0.541748	0.291859	0.875642	-0.0940804	0.439783	0.412614	0.492171
SERPIND1	0.0607509	-0.169329	0.450204	-0.028781	0.277293	0.849242	0.245876	0.542389	0.872556	0.30642	0.418674	0.357662	0.779424	0.546311	0.0220722	-0.051197	0.178579	-0.0913379	0.137557	0.698256	0.0138359	0.389493	-0.00613058	0.104187	0.300431	0.216692	0.774967	0.407964	0.0622024	-0.351509	0.00143355	0.612829	0.111957	0.598388	-0.22948	0.738952	0.460868	-0.15841	0.559663	-0.142933	-0.291322	0.650645	0.0415786	0.364285	0.166417	-0.128539	0.788815	0.554434	0.698211
ENTPD8	-0.276237	-0.0710569	0.190341	0.2989	-0.00934546	0.589239	0.379801	0.807895	0.589113	-0.112337	0.443518	0.556815	0.589365	0.666406	0.164838	0.568012	-0.288175	-0.230104	0.19778	0.261602	0.389357	-0.00973589	-0.316156	0.0411157	0.00583468	-0.192592	0.510453	0.666727	-0.256984	0.264207	0.247937	0.405865	0.236054	0.0452949	-0.048422	0.686153	0.915694	0.329841	0.610645	-0.350683	-0.506954	0.0539027	0.630925	0.248708	0.662928	-0.185942	0.585078	0.372592	0.726657
GJB1	0.220605	-0.0261331	0.673464	-0.0215324	0.26223	0.930049	0.428046	0.377895	0.910587	0.573423	0.486205	0.381269	0.78752	0.603888	0.241894	-0.183842	0.337474	0.0841562	0.37376	0.673772	0.147091	0.523849	0.152435	0.394736	0.492705	0.371505	0.787842	0.438901	0.231222	-0.223908	0.162961	0.468497	0.187093	0.697655	-0.306954	0.837509	0.44086	0.00692636	0.58963	-0.0718022	-0.0973167	0.565064	-0.0652741	0.60355	0.306814	0.0799688	0.893895	0.741347	0.536403
NECTIN1	0.576099	0.615856	0.824006	0.392919	0.575995	0.680535	0.280754	0.614976	0.725998	0.662941	0.343108	0.536701	0.898766	0.676338	0.753152	0.300663	0.473659	0.569044	0.538453	0.312454	0.141791	0.799144	0.552249	0.573625	0.797843	0.68071	0.789786	0.894052	0.593351	0.441012	0.616079	0.364188	0.833118	0.74343	0.388959	0.887007	0.536659	0.153092	0.797042	0.271094	0.162568	0.422351	0.47108	0.700881	0.558062	0.246919	0.827336	0.934575	0.431679
TNFSF15	-0.042693	0.315842	0.0763811	0.360843	0.195662	-0.0269541	-0.182325	0.60253	0.0917685	-0.249367	0.361348	0.61626	0.406746	0.436874	0.248834	0.912969	-0.169547	0.0122042	-0.225323	-0.111977	0.189342	0.0339171	-0.0386489	-0.258558	0.193823	0.0329209	0.370476	0.646623	0.108653	0.550334	0.107726	0.402599	0.453974	-0.0700215	0.449301	0.225401	0.431709	0.314488	0.542365	-0.194136	-0.332337	-0.0958376	0.925842	0.117959	0.531524	-0.244765	0.153894	0.165743	0.445686
GPC5	-0.0410866	0.358545	0.164862	0.564834	0.11372	0.224647	0.20444	0.768971	0.26368	-0.0215589	0.112989	0.401826	0.433836	0.52031	0.441212	0.68838	-0.0676355	0.113964	0.294912	-0.0189175	0.182959	0.165885	-0.0109072	0.190933	0.179145	0.0258876	0.302649	0.75311	0.0607959	0.745785	0.536188	0.0629403	0.603167	-0.0145827	0.474033	0.481006	0.766359	0.284668	0.48291	-0.069187	-0.219723	-0.0943387	0.781734	0.126709	0.696021	0.0454442	0.295375	0.378913	0.42594
TNFAIP6	-0.167243	0.314318	0.0545874	0.524542	-0.0163444	0.0556464	0.232993	0.641788	0.0684313	-0.231912	0.249971	0.52066	0.244573	0.470721	0.402463	0.861316	-0.341199	0.0232614	0.198142	-0.275106	0.471941	-0.111132	-0.14729	0.0702897	-0.00235842	-0.176798	0.119466	0.68861	-0.128148	0.772372	0.453113	0.0763576	0.453691	-0.260434	0.356944	0.336266	0.74623	0.572645	0.438469	-0.146149	-0.238985	-0.384016	0.895173	0.150242	0.743794	-0.0289885	0.159878	0.171475	0.304812
CPE	0.591263	0.798537	0.580081	0.499087	0.362309	0.22673	0.301592	0.341642	0.20979	0.560146	-0.102757	0.183648	0.406154	0.323788	0.902799	0.266359	0.348881	0.743364	0.76781	-0.188642	0.156186	0.610583	0.599832	0.763848	0.579796	0.532943	0.233854	0.726078	0.495986	0.803528	0.889694	-0.22821	0.906638	0.376801	0.581975	0.576119	0.438174	0.259444	0.451547	0.47483	0.428054	-0.0520651	0.416977	0.508552	0.548577	0.444739	0.413759	0.709355	-0.0161544
NINJ2	0.327155	0.292925	0.743498	0.312239	0.631677	0.825923	0.24913	0.715801	0.907246	0.496286	0.665587	0.7332	0.972257	0.802308	0.370005	0.299058	0.39507	0.230593	0.157018	0.592453	0.197665	0.646868	0.332117	0.209408	0.671433	0.55215	0.916026	0.760142	0.462819	0.0183333	0.222317	0.792095	0.465298	0.764107	0.168087	0.787369	0.454715	0.115332	0.755272	0.0860074	-0.0360151	0.673301	0.424216	0.589653	0.354685	0.0892236	0.81493	0.711804	0.555908
CXCL14	-0.140636	0.326188	0.171062	0.665916	0.083207	0.278359	0.372637	0.806405	0.292796	-0.024763	0.214634	0.474867	0.384639	0.60799	0.426023	0.695998	-0.102825	0.0541916	0.338665	-0.0120032	0.346025	0.0903645	-0.071414	0.230514	0.123083	-0.0454222	0.23373	0.748369	0.00735406	0.770665	0.574989	0.0641997	0.512978	-0.0780762	0.419263	0.458983	0.830968	0.435218	0.415291	-0.0788789	-0.183239	-0.145971	0.785875	0.126762	0.743502	0.151362	0.258434	0.311902	0.333584
MEGF6	0.209278	0.524298	0.444111	0.715799	0.227135	0.442008	0.587443	0.611946	0.401037	0.501139	-0.0636176	0.154241	0.37511	0.518816	0.66024	0.155598	0.355775	0.417635	0.789478	0.118818	0.161266	0.483384	0.315777	0.750386	0.387376	0.310142	0.179562	0.660507	0.326917	0.762632	0.892522	-0.259851	0.662093	0.256905	0.479326	0.555205	0.671011	0.236173	0.242677	0.305289	0.273883	0.0565793	0.326254	0.246779	0.590541	0.590055	0.339403	0.569803	0.0187708
LECT2	-0.256957	-0.318825	-0.768749	-0.156924	-0.125339	-0.617999	-0.52764	-0.179325	-0.576556	-0.547069	-0.752756	-0.703481	-0.590873	-0.704562	-0.590815	-0.231537	-0.225111	-0.244266	-0.424015	-0.200836	-0.62592	-0.371136	-0.216489	-0.509152	-0.617124	-0.361775	-0.59945	-0.596778	-0.364476	-0.36265	-0.337047	-0.281401	-0.325273	-0.394228	0.219052	-0.699486	-0.449946	-0.661627	-0.656331	0.130271	-0.0560185	0.0287931	-0.313784	-0.857497	-0.755719	-0.237545	-0.724597	-0.71681	-0.210434
HAO1	-0.298921	-0.394574	-0.559247	-0.489017	-0.328888	-0.421297	-0.783522	-0.0505397	-0.304346	-0.636513	-0.234277	-0.198615	-0.0566398	-0.3445	-0.479438	0.266073	-0.359877	-0.448082	-0.696249	-0.0246972	-0.561436	-0.328809	-0.441808	-0.754869	-0.299532	-0.341998	0.109827	-0.203188	-0.303523	-0.193911	-0.620262	0.0919818	-0.141687	-0.329815	-0.0636496	-0.228725	-0.124395	-0.485683	0.107166	-0.565812	-0.738708	-0.0713061	0.176586	-0.42029	-0.103861	-0.812718	-0.162318	-0.236477	0.585435
ABCC6	-0.288939	-0.391064	-0.536972	-0.506379	-0.330794	-0.403633	-0.777923	-0.0501038	-0.2884	-0.635075	-0.202843	-0.167758	-0.0318523	-0.328191	-0.460608	0.288398	-0.378677	-0.443749	-0.68972	-0.032168	-0.530532	-0.32868	-0.44348	-0.751304	-0.288529	-0.340771	0.13708	-0.17949	-0.310118	-0.193468	-0.620629	0.115135	-0.131344	-0.320695	-0.0851376	-0.195313	-0.104382	-0.458523	0.148941	-0.580072	-0.752872	-0.0825458	0.198035	-0.379295	-0.0761466	-0.833919	-0.124643	-0.210766	0.61298
PI15	0.00248045	0.403458	0.276968	0.555207	0.113719	0.294569	0.299666	0.745182	0.314781	0.0359208	0.24513	0.519846	0.485974	0.598495	0.540011	0.733972	-0.0960907	0.158378	0.369102	-0.0563531	0.349365	0.174784	0.014066	0.26873	0.236334	0.0493322	0.353573	0.826096	0.0699183	0.781568	0.582124	0.10588	0.62728	0.0157235	0.398841	0.577083	0.82337	0.44308	0.582227	-0.0777058	-0.191045	-0.157158	0.827981	0.290829	0.803745	0.0657823	0.400688	0.460973	0.426587
FGG	-0.10416	-0.330877	0.387725	-0.136494	0.132498	0.820277	0.23143	0.442652	0.844277	0.1997	0.608772	0.458435	0.72042	0.580539	-0.126258	-0.020557	0.0917639	-0.288921	-0.0491899	0.73471	0.10933	0.227413	-0.176756	-0.0552152	0.23908	0.0935873	0.783329	0.301067	-0.0120431	-0.431014	-0.212874	0.686179	-0.0991628	0.476811	-0.435019	0.646071	0.409527	-0.0465647	0.539296	-0.369058	-0.437072	0.56172	0.0330121	0.361491	0.214317	-0.225108	0.744619	0.448214	0.717276
TGFBI	0.354552	0.624633	0.664389	0.709134	0.504303	0.597541	0.439166	0.785609	0.632737	0.568564	0.261187	0.500083	0.726086	0.743223	0.70853	0.377	0.460412	0.471134	0.582774	0.282289	0.184259	0.675937	0.440687	0.597422	0.653357	0.533573	0.560244	0.889546	0.535027	0.679334	0.760498	0.184585	0.791425	0.520234	0.55544	0.719964	0.658357	0.247655	0.562552	0.280234	0.195585	0.311029	0.555735	0.449472	0.629451	0.453518	0.570597	0.74238	0.255298
EPHB6	-0.226084	0.13475	0.225572	0.619856	-0.0956163	0.523097	0.670742	0.710945	0.464314	0.206462	0.114614	0.239222	0.335458	0.625606	0.365579	0.248312	0.0646964	-0.03124	0.606691	0.247455	0.27819	0.146316	-0.138857	0.506371	0.104596	-0.072164	0.197194	0.575085	-0.0234963	0.654885	0.654371	-0.182579	0.342902	-0.0122176	0.150573	0.55221	0.891815	0.332702	0.239121	-0.13117	-0.141965	-0.065204	0.377429	0.1138	0.742841	0.364083	0.344842	0.410191	0.266131
C5AR1	0.70435	0.774226	0.842971	0.321566	0.537024	0.450923	0.188619	0.370463	0.489435	0.655354	0.345878	0.557773	0.760522	0.552624	0.891629	0.385983	0.428373	0.712883	0.529152	0.0354965	0.24778	0.75489	0.655077	0.598846	0.849484	0.723384	0.671502	0.865413	0.663083	0.582752	0.628953	0.253742	0.894905	0.652666	0.415736	0.774004	0.381885	0.319717	0.802214	0.320341	0.28596	0.178861	0.527536	0.815757	0.605628	0.246769	0.73093	0.910107	0.254766
FGA	-0.236598	-0.303788	-0.749761	-0.148734	-0.107802	-0.605717	-0.490859	-0.189028	-0.574129	-0.531474	-0.749944	-0.700678	-0.60039	-0.708606	-0.569191	-0.244518	-0.236714	-0.216827	-0.385394	-0.225833	-0.582665	-0.371362	-0.195722	-0.476348	-0.625471	-0.358446	-0.621779	-0.594631	-0.375926	-0.374323	-0.307892	-0.281144	-0.324818	-0.383699	0.213254	-0.689955	-0.44801	-0.633686	-0.662833	0.174054	-0.0115722	0.022119	-0.326531	-0.832699	-0.770546	-0.211264	-0.717401	-0.718797	-0.244157
FGB	0.0475064	-0.20444	0.392151	-0.135281	0.296773	0.741701	0.0375031	0.500599	0.808267	0.183949	0.504487	0.439639	0.797058	0.510102	-0.0731944	0.0681147	0.125768	-0.156804	-0.107958	0.678672	-0.0340693	0.337029	-0.0419929	-0.118263	0.305995	0.210191	0.840851	0.379587	0.0733276	-0.428627	-0.199083	0.76393	0.0687205	0.572532	-0.231697	0.651595	0.343399	-0.189456	0.618468	-0.237697	-0.401058	0.662017	0.128484	0.342404	0.115001	-0.304604	0.748601	0.483777	0.777919
PEPD	0.478048	0.597528	0.829487	0.551223	0.71101	0.710237	0.292826	0.739797	0.795314	0.640306	0.551473	0.718991	0.929557	0.82645	0.629006	0.380626	0.559034	0.471483	0.335427	0.447678	0.193804	0.791336	0.537618	0.422171	0.83296	0.710837	0.824091	0.893129	0.683968	0.388279	0.500309	0.577312	0.721774	0.760516	0.458997	0.757695	0.464357	0.20892	0.72284	0.264909	0.180418	0.562233	0.541416	0.615027	0.489832	0.327312	0.718871	0.798129	0.355669
SERPINA10	-0.336355	-0.430476	-0.747397	-0.425547	-0.299544	-0.579198	-0.811536	-0.110976	-0.472628	-0.70532	-0.498904	-0.451603	-0.294925	-0.554974	-0.613078	0.0966784	-0.354071	-0.441543	-0.703906	-0.0956661	-0.696198	-0.399717	-0.422278	-0.78118	-0.482617	-0.406572	-0.173175	-0.408127	-0.374119	-0.293907	-0.607284	-0.0562414	-0.24456	-0.414725	0.051726	-0.474286	-0.286991	-0.65095	-0.2061	-0.369822	-0.576445	-0.0364373	-0.00404173	-0.687806	-0.398906	-0.702053	-0.436262	-0.482942	0.345129
SERPINA1	-0.294133	-0.31087	-0.761181	-0.0864941	-0.135883	-0.604529	-0.539738	-0.129642	-0.542331	-0.49471	-0.745239	-0.702129	-0.559739	-0.636053	-0.606485	-0.244191	-0.0948445	-0.278851	-0.460804	-0.0858453	-0.726173	-0.308964	-0.219672	-0.508374	-0.53488	-0.312867	-0.547678	-0.586268	-0.254838	-0.277991	-0.34305	-0.317616	-0.30878	-0.383846	0.271866	-0.722651	-0.450385	-0.709034	-0.681555	0.0637005	-0.0931921	0.0787444	-0.310047	-0.914694	-0.69584	-0.179447	-0.753687	-0.68436	-0.19993
SERPINA11	-0.0260315	-0.173168	0.0327083	-0.546779	-0.227521	0.0412542	-0.374415	-0.00769878	0.088612	-0.33559	0.3718	0.3816	0.376194	0.0812067	0.0170359	0.513142	-0.475919	-0.204227	-0.315514	-0.100388	0.138127	-0.172651	-0.287985	-0.386511	0.0261765	-0.166699	0.520192	0.26613	-0.251974	-0.0813989	-0.372797	0.416938	0.0885567	-0.0437549	-0.368366	0.397731	0.249712	0.138242	0.729787	-0.583305	-0.674632	-0.208307	0.451283	0.397106	0.404335	-0.803003	0.503826	0.28566	0.792367
KCNC1	-0.485907	-0.249899	-0.290632	0.248102	0.00491725	-0.158092	-0.174558	0.202038	-0.0449404	-0.291279	0.330376	0.243738	-0.111538	0.207871	-0.514049	0.197534	0.106731	-0.491538	-0.695264	0.318846	-0.114436	-0.22542	-0.301053	-0.577457	-0.0868249	-0.151351	-0.0218759	-0.188906	0.0871901	-0.0594167	-0.475448	0.294461	-0.408137	-0.24509	0.0942782	-0.507477	-0.208907	-0.0116577	-0.30872	-0.333216	-0.249891	0.163008	0.142344	-0.477923	-0.110768	0.00405981	-0.462131	-0.481184	-0.0842265
HPN	-0.0243815	-0.261124	0.384772	-0.315341	-0.172623	0.712932	0.251757	0.229932	0.676219	0.216404	0.398771	0.284123	0.632771	0.432168	0.115866	-0.0231609	-0.0470407	-0.177744	0.237485	0.474427	0.134133	0.180662	-0.206066	0.180826	0.22524	0.0143203	0.713735	0.341511	-0.109296	-0.15758	-0.0236355	0.297198	0.0725364	0.334085	-0.550651	0.803513	0.559966	0.0459089	0.666531	-0.481274	-0.505437	0.18419	0.0377869	0.52705	0.507482	-0.310006	0.860831	0.654379	0.790208
COL3A1	0.263556	0.579768	0.395036	0.74029	0.272535	0.30866	0.494454	0.51619	0.283286	0.535782	-0.187631	0.033938	0.265992	0.407195	0.631249	0.0618962	0.475621	0.478782	0.738798	0.0955259	0.0220045	0.526503	0.406461	0.740287	0.413818	0.382336	0.0749057	0.552409	0.435136	0.76803	0.875696	-0.354445	0.658157	0.255624	0.590479	0.389426	0.488623	0.129697	0.0909698	0.405709	0.39319	0.0877098	0.230924	0.135697	0.45302	0.674313	0.176877	0.487561	-0.144056
HAMP	-0.29174	-0.181308	-0.42	0.094554	-0.142941	-0.308405	-0.404922	0.0766968	-0.201172	-0.173476	-0.365592	-0.358033	-0.182679	-0.151035	-0.403102	-0.114507	0.28455	-0.298465	-0.427168	0.292534	-0.719547	-0.0120706	-0.177475	-0.348175	-0.0562746	-0.0546856	-0.0924258	-0.276874	0.156323	0.0880117	-0.270101	-0.243549	-0.118741	-0.199476	0.274556	-0.443948	-0.233056	-0.545653	-0.381911	-0.246584	-0.25994	0.173395	-0.110691	-0.662498	-0.169901	-0.032497	-0.466437	-0.263978	0.0205162
SAA4	-0.335318	-0.431027	-0.742429	-0.432128	-0.302036	-0.574974	-0.813747	-0.109907	-0.467927	-0.706704	-0.489265	-0.44213	-0.286108	-0.54954	-0.60943	0.105207	-0.359102	-0.443076	-0.705959	-0.0956027	-0.690865	-0.399813	-0.425069	-0.783635	-0.47843	-0.406673	-0.16223	-0.400875	-0.375244	-0.292711	-0.610569	-0.0488351	-0.241374	-0.413011	0.0454096	-0.464674	-0.280857	-0.645269	-0.19208	-0.378953	-0.585694	-0.0394013	0.00414087	-0.677369	-0.388655	-0.711796	-0.425028	-0.474658	0.357518
RNASE6	0.920193	0.867092	0.839587	0.336599	0.847772	0.315673	0.00492895	0.20873	0.394619	0.797617	0.170325	0.36172	0.642084	0.337376	0.774915	0.095669	0.722966	0.890294	0.389885	0.0927458	-0.0214308	0.934834	0.946882	0.546815	0.932891	0.97421	0.539367	0.629151	0.907996	0.312305	0.530258	0.301931	0.83773	0.855636	0.62454	0.478159	-0.0865407	0.0149927	0.509212	0.69279	0.640421	0.491681	0.235181	0.643611	0.0937552	0.425	0.485068	0.735133	-0.0832624
CCR5	0.398414	0.538822	0.654669	0.406421	0.640642	0.508789	0.0525921	0.728675	0.623336	0.319515	0.591796	0.811619	0.889755	0.724367	0.54441	0.674159	0.247438	0.367473	0.0930246	0.232726	0.249474	0.574109	0.390751	0.12696	0.669668	0.535234	0.80935	0.911031	0.48739	0.361333	0.319904	0.714189	0.699813	0.579179	0.448578	0.687707	0.466403	0.263781	0.844191	0.12751	-0.0297635	0.395969	0.777744	0.579961	0.498234	-0.00148387	0.667818	0.659486	0.519729
CCR2	0.505415	0.722562	0.618086	0.505628	0.736446	0.290548	0.0037343	0.638116	0.405529	0.289387	0.501404	0.78641	0.725908	0.601026	0.636812	0.748584	0.226228	0.532282	0.104039	-0.0200946	0.315926	0.547838	0.531188	0.146635	0.646814	0.575902	0.600888	0.889634	0.537888	0.471113	0.411789	0.633983	0.771208	0.507699	0.640189	0.512313	0.324479	0.351384	0.728491	0.346317	0.194652	0.275275	0.83565	0.545652	0.398914	0.102211	0.470056	0.527295	0.260327
BDKRB1	0.312732	0.554426	0.450568	0.594613	0.177217	0.370514	0.56598	0.428431	0.302345	0.544069	-0.181756	0.0262165	0.28811	0.371715	0.721885	0.0439684	0.338338	0.514653	0.883934	-0.00017828	0.147355	0.486405	0.380216	0.840553	0.376467	0.32813	0.0966584	0.582791	0.312491	0.738946	0.926345	-0.392577	0.679066	0.257307	0.425464	0.546061	0.586507	0.2155	0.214608	0.375071	0.362194	-0.029622	0.20877	0.305294	0.540379	0.588642	0.339023	0.59527	-0.0604932
INSC	-0.337336	-0.395974	-0.799199	-0.277236	-0.235878	-0.626331	-0.724547	-0.124601	-0.534593	-0.63946	-0.652645	-0.604897	-0.444434	-0.625934	-0.647659	-0.0695688	-0.238599	-0.388162	-0.626069	-0.0907725	-0.758431	-0.375158	-0.346084	-0.691203	-0.534014	-0.381605	-0.369459	-0.521919	-0.331288	-0.299464	-0.51143	-0.192935	-0.290846	-0.42378	0.168233	-0.629091	-0.386579	-0.721944	-0.459006	-0.177461	-0.370108	0.0217923	-0.15803	-0.846433	-0.569431	-0.478765	-0.6238	-0.611877	0.0923662
DNAH9	-0.0533589	-0.191997	-0.00580767	-0.544452	-0.243436	0.0131748	-0.416323	-0.000685616	0.0710214	-0.355604	0.342311	0.352927	0.363698	0.0681728	-0.0200993	0.508571	-0.455161	-0.234273	-0.358789	-0.0744737	0.0731067	-0.175799	-0.30781	-0.423305	0.0212722	-0.173724	0.517749	0.243615	-0.240459	-0.0742045	-0.402199	0.399284	0.0786003	-0.0627451	-0.347269	0.36129	0.231063	0.089329	0.702997	-0.613004	-0.706641	-0.194697	0.446338	0.340415	0.393354	-0.815457	0.46655	0.26457	0.803586
HABP2	-0.246236	-0.37775	-0.461463	-0.572563	-0.331734	-0.345508	-0.750119	-0.0585447	-0.241211	-0.635443	-0.100738	-0.0665669	0.0422527	-0.286575	-0.392138	0.360669	-0.463117	-0.418453	-0.654594	-0.0799366	-0.404757	-0.338142	-0.444154	-0.733009	-0.267311	-0.343813	0.213328	-0.103272	-0.351382	-0.207827	-0.61486	0.196575	-0.100062	-0.290362	-0.164907	-0.0805002	-0.0385167	-0.356506	0.288094	-0.607094	-0.784096	-0.128555	0.264897	-0.231168	0.00187802	-0.906964	0.00455206	-0.132296	0.694363
XG	0.434861	0.601236	0.589339	0.63085	0.550769	0.495592	0.251855	0.657254	0.559266	0.646365	0.0200787	0.236116	0.648652	0.556221	0.593477	0.122062	0.675469	0.509311	0.498775	0.390888	-0.171342	0.79468	0.541475	0.564007	0.699471	0.651517	0.513468	0.696345	0.67448	0.552117	0.668373	0.0705253	0.764704	0.605348	0.640341	0.55937	0.401146	-0.0873724	0.380096	0.367073	0.271485	0.486662	0.309873	0.267845	0.375669	0.48949	0.434101	0.696448	0.166474
C7orf57	-0.0260315	-0.173168	0.0327083	-0.546779	-0.227521	0.0412542	-0.374415	-0.00769878	0.088612	-0.33559	0.3718	0.3816	0.376194	0.0812067	0.0170359	0.513142	-0.475919	-0.204227	-0.315514	-0.100388	0.138127	-0.172651	-0.287985	-0.386511	0.0261765	-0.166699	0.520192	0.26613	-0.251974	-0.0813989	-0.372797	0.416938	0.0885567	-0.0437549	-0.368366	0.397731	0.249712	0.138242	0.729787	-0.583305	-0.674632	-0.208307	0.451283	0.397106	0.404335	-0.803003	0.503826	0.28566	0.792367
THOC7	0.556505	0.810066	0.479194	0.558247	0.512896	0.132037	0.27567	0.438921	0.119016	0.31266	-0.0162374	0.333588	0.341055	0.279947	0.840478	0.503894	0.0555276	0.737594	0.646466	-0.415984	0.397355	0.421075	0.569159	0.57084	0.363695	0.39716	0.0987892	0.76247	0.283423	0.67197	0.848137	0.0189044	0.848673	0.286446	0.661951	0.48216	0.436972	0.404033	0.44762	0.63481	0.487654	-0.0927144	0.607159	0.471773	0.376584	0.341149	0.314443	0.464532	-0.0737201
HBEGF	0.168005	0.298562	0.383433	0.0790156	0.129982	0.321729	0.00495682	0.514941	0.371255	-0.0160183	0.456166	0.658402	0.676506	0.510564	0.489899	0.774194	-0.225812	0.146372	0.128094	-0.062595	0.352507	0.183046	0.0211516	0.0461238	0.332564	0.116983	0.651589	0.803429	0.0429294	0.437946	0.237581	0.435363	0.580582	0.180742	0.113063	0.720183	0.658422	0.387233	0.913961	-0.240293	-0.38241	-0.0963198	0.821193	0.578251	0.736667	-0.355351	0.682585	0.599589	0.727698
SLC6A11	-0.0885292	-0.342917	0.278865	-0.113651	0.122898	0.785991	0.244064	0.470203	0.787009	0.177465	0.31317	0.211386	0.629451	0.427723	-0.135759	-0.148443	0.0612547	-0.236968	0.0974635	0.682852	-0.0294783	0.228765	-0.161795	0.0297944	0.105602	0.0415623	0.637642	0.244547	-0.116405	-0.455159	-0.085976	0.51385	-0.054624	0.456513	-0.348128	0.635805	0.443493	-0.223356	0.41745	-0.224202	-0.372085	0.584702	-0.0788081	0.217079	0.0822902	-0.189251	0.683171	0.407312	0.682715
LMX1A	-0.0765622	0.222862	0.185442	0.595772	0.121495	0.446105	0.393199	0.822709	0.44913	0.141192	-0.0318926	0.192477	0.44673	0.523814	0.349491	0.339072	0.086809	0.0759736	0.476242	0.233301	0.0441145	0.265509	-0.01237	0.357932	0.14054	0.0424419	0.286859	0.643993	0.0372259	0.564949	0.61117	-0.029736	0.50696	0.11747	0.390462	0.550442	0.805269	0.074282	0.324167	0.0161199	-0.148423	0.131785	0.472948	0.0295278	0.549264	0.211871	0.348182	0.416968	0.397593
SFTPC	-0.14859	-0.246535	-0.144982	-0.49716	-0.283741	-0.0895304	-0.53849	0.0247803	0.00220112	-0.402759	0.211008	0.223821	0.292455	0.0160699	-0.153249	0.455708	-0.347445	-0.326444	-0.490019	0.0247585	-0.167757	-0.174663	-0.35769	-0.52644	0.00197977	-0.186787	0.471944	0.144632	-0.181564	-0.0428346	-0.480049	0.306804	0.036907	-0.127091	-0.246024	0.203435	0.146984	-0.0943157	0.555731	-0.676887	-0.772217	-0.131476	0.396561	0.110662	0.325482	-0.802391	0.298155	0.169253	0.786893
TNFSF9	0.0708209	0.418831	0.239336	0.331561	0.132482	0.0781631	0.00916738	0.548736	0.13932	-0.131972	0.399049	0.666513	0.458097	0.485594	0.492362	0.9284	-0.244513	0.154052	0.0653205	-0.243966	0.411662	0.0660843	0.0187215	-0.00279997	0.247547	0.0488484	0.393177	0.779666	0.0693494	0.681341	0.317846	0.302539	0.581776	-0.038781	0.347067	0.451377	0.603902	0.521681	0.70132	-0.15789	-0.262992	-0.264998	0.95922	0.38361	0.740855	-0.196261	0.356833	0.366072	0.45954
CPB2	-0.272242	-0.438701	-0.661077	-0.597472	-0.321133	-0.514685	-0.816081	-0.145852	-0.425447	-0.769291	-0.34387	-0.293486	-0.182988	-0.531808	-0.525184	0.243444	-0.568205	-0.41872	-0.681325	-0.217988	-0.487647	-0.460505	-0.453999	-0.804274	-0.495719	-0.452844	-0.0526491	-0.296089	-0.503492	-0.361017	-0.639829	0.101697	-0.206881	-0.390071	-0.106956	-0.286755	-0.183276	-0.495457	0.0477578	-0.433933	-0.670079	-0.137047	0.121521	-0.445569	-0.293402	-0.904702	-0.217404	-0.37688	0.522481
TUBB4A	0.631978	0.784663	0.588443	0.495172	0.657366	0.22541	-0.0680611	0.506923	0.33652	0.527332	0.0527809	0.345183	0.638856	0.412407	0.691602	0.37462	0.569585	0.668225	0.301774	0.102438	-0.151453	0.78225	0.67736	0.38848	0.772904	0.740606	0.529363	0.749784	0.751059	0.59482	0.561922	0.193132	0.906452	0.590119	0.773876	0.467952	0.205156	-0.030276	0.53329	0.4316	0.302413	0.363259	0.520002	0.377694	0.331754	0.283382	0.386747	0.66968	0.164564
AOC1	-0.0785978	0.0149408	0.343915	0.205427	0.30137	0.585609	0.0850059	0.774609	0.678126	-0.0302336	0.683676	0.771864	0.793407	0.720448	0.102189	0.630192	-0.0779008	-0.155417	-0.151222	0.411403	0.268922	0.187071	-0.116252	-0.195743	0.276478	0.09345	0.778983	0.686355	0.0422977	0.0479892	-0.0264916	0.807781	0.256256	0.31367	0.0422914	0.62279	0.604318	0.211268	0.745908	-0.299103	-0.469012	0.358702	0.678609	0.345174	0.468684	-0.290554	0.632576	0.405988	0.774699
SLC25A47	-0.216757	-0.336044	-0.75013	-0.27931	-0.136383	-0.608473	-0.541522	-0.222511	-0.582939	-0.617848	-0.697634	-0.642821	-0.56257	-0.74085	-0.556825	-0.15684	-0.395073	-0.226314	-0.410857	-0.315994	-0.496775	-0.438671	-0.238518	-0.537209	-0.675085	-0.416239	-0.574973	-0.56055	-0.486269	-0.442018	-0.362114	-0.193183	-0.32198	-0.397491	0.122044	-0.613721	-0.409285	-0.582011	-0.533692	0.126695	-0.0922681	-0.0425292	-0.259123	-0.734644	-0.747082	-0.373686	-0.620881	-0.695971	-0.128111
PCDHA13	0.0527428	0.305723	0.373986	0.70242	0.318378	0.605172	0.49165	0.843893	0.617568	0.40515	0.0365652	0.218194	0.546544	0.629878	0.38866	0.152046	0.383704	0.187866	0.538193	0.439198	-0.00783491	0.492303	0.177904	0.493866	0.343581	0.273012	0.376525	0.645405	0.279917	0.493348	0.662043	0.0390236	0.524501	0.353935	0.448001	0.57359	0.696713	0.00912178	0.268595	0.175523	0.0519246	0.379273	0.322813	0.0855922	0.44873	0.441463	0.392817	0.508486	0.267469
RGS4	-0.295115	0.0833194	0.0674118	0.579228	0.0223106	0.383612	0.309467	0.872159	0.41925	-0.0611499	0.172297	0.36208	0.433366	0.610982	0.176811	0.528597	-0.0341461	-0.161136	0.197008	0.273071	0.108127	0.0866891	-0.219013	0.09256	0.0628444	-0.105345	0.328561	0.619893	-0.0421043	0.554636	0.387366	0.120241	0.348689	-0.0421969	0.308984	0.440799	0.814989	0.173028	0.342089	-0.238291	-0.373466	0.0662289	0.622973	-0.0524733	0.627991	0.0615267	0.266977	0.272774	0.49603
PCDHGB7	0.276853	0.48679	0.616435	0.541638	0.196375	0.589693	0.553345	0.539911	0.560901	0.628294	0.136494	0.282371	0.56704	0.631385	0.69746	0.1273	0.449213	0.397098	0.744922	0.275901	0.159248	0.591968	0.325613	0.758032	0.58372	0.421558	0.448902	0.712339	0.443016	0.702235	0.77473	-0.138025	0.669069	0.402891	0.294163	0.72452	0.668657	0.251603	0.455629	0.125957	0.149967	0.120633	0.305145	0.465054	0.728109	0.48803	0.575154	0.78689	0.203562
C5	-0.297212	-0.387456	-0.815427	-0.292477	-0.200908	-0.648728	-0.674484	-0.176843	-0.583587	-0.661156	-0.705558	-0.652121	-0.521524	-0.710777	-0.636776	-0.113511	-0.324549	-0.331312	-0.555937	-0.201389	-0.672448	-0.423731	-0.31281	-0.65318	-0.626704	-0.416892	-0.483832	-0.565518	-0.420851	-0.381419	-0.466739	-0.20209	-0.319731	-0.432326	0.154363	-0.652398	-0.416032	-0.69147	-0.515963	-0.0436561	-0.258284	-0.00764881	-0.212905	-0.835053	-0.680666	-0.453771	-0.65259	-0.681288	-0.00600156
CAMK4	-0.227618	0.00520069	0.109838	0.458387	-0.198659	0.484031	0.667872	0.549944	0.383884	0.18286	-0.128304	-0.0415249	0.18535	0.399648	0.273324	-0.003963	9.88714e-05	-0.0447225	0.697731	0.206717	0.165163	0.0812591	-0.17532	0.554081	-0.0612604	-0.163366	0.0416153	0.377153	-0.177838	0.471473	0.639088	-0.35075	0.236479	-0.0435434	0.0311533	0.5048	0.815341	0.160645	0.0884942	-0.0675384	-0.103258	-0.0745135	0.116382	0.020237	0.551752	0.335524	0.298596	0.338668	0.211504
LYVE1	0.17755	0.387304	0.482897	0.40169	0.459731	0.473433	0.0846711	0.80341	0.572767	0.109972	0.579527	0.803518	0.812774	0.723757	0.435856	0.779857	0.0304574	0.176379	0.0504354	0.186534	0.310247	0.364529	0.158699	0.0208118	0.461788	0.295246	0.732309	0.892212	0.255318	0.391973	0.278322	0.672807	0.598543	0.372088	0.363495	0.66699	0.622076	0.321187	0.821827	-0.044889	-0.223095	0.253752	0.861801	0.465803	0.586996	-0.118638	0.617222	0.54549	0.623114
APOA2	-0.279096	-0.300742	-0.75495	-0.0782542	-0.120446	-0.602314	-0.511667	-0.140964	-0.548759	-0.486408	-0.755364	-0.71162	-0.578821	-0.650139	-0.595253	-0.262098	-0.105968	-0.256214	-0.429919	-0.110879	-0.696419	-0.313466	-0.202251	-0.483595	-0.551343	-0.314035	-0.579331	-0.594213	-0.269024	-0.293291	-0.319235	-0.323652	-0.313451	-0.379597	0.271712	-0.726052	-0.456357	-0.693721	-0.700762	0.10859	-0.0498301	0.0742234	-0.328563	-0.906433	-0.722238	-0.154476	-0.760152	-0.697871	-0.237948
COL1A2	0.2522	0.600543	0.38791	0.747664	0.281967	0.285491	0.433953	0.570461	0.279336	0.479532	-0.137919	0.11068	0.313843	0.443745	0.641803	0.185105	0.435883	0.462605	0.673325	0.075533	0.0323527	0.513968	0.385428	0.671591	0.429988	0.375107	0.129894	0.618313	0.437526	0.816588	0.849712	-0.290972	0.700806	0.236173	0.628164	0.406595	0.52408	0.15747	0.169251	0.353686	0.322274	0.0681774	0.349102	0.147723	0.512359	0.601933	0.194378	0.498982	-0.0664455
ITGBL1	-0.14288	0.297373	0.0681044	0.702884	0.0591232	0.18437	0.296862	0.710315	0.211928	0.0893603	-0.0706112	0.159447	0.241307	0.46197	0.313579	0.390593	0.171596	0.0573713	0.331836	0.135343	-0.015425	0.197364	-0.00808613	0.280811	0.152809	0.0386005	0.10984	0.535123	0.160732	0.758841	0.565845	-0.189973	0.465372	-0.060176	0.525825	0.260081	0.628682	0.128424	0.125991	-0.0131984	-0.0848484	-0.0139702	0.504365	-0.131196	0.557254	0.320138	0.0483149	0.244814	0.162127
DEPDC1	0.156477	-0.115172	0.470448	-0.249204	0.312214	0.623779	-0.116296	0.320772	0.718326	0.21433	0.645965	0.557859	0.807279	0.493322	-0.0180063	0.147973	0.177607	-0.0944594	-0.255082	0.603862	-0.00567575	0.367496	0.041406	-0.192695	0.459486	0.321204	0.914585	0.371225	0.22768	-0.393168	-0.324991	0.828916	0.0907233	0.593349	-0.254266	0.587966	0.166363	-0.101186	0.70741	-0.29652	-0.387173	0.588967	0.184815	0.477842	0.159876	-0.370351	0.74448	0.520556	0.740202
INHBE	-0.0260315	-0.173168	0.0327083	-0.546779	-0.227521	0.0412542	-0.374415	-0.00769878	0.088612	-0.33559	0.3718	0.3816	0.376194	0.0812067	0.0170359	0.513142	-0.475919	-0.204227	-0.315514	-0.100388	0.138127	-0.172651	-0.287985	-0.386511	0.0261765	-0.166699	0.520192	0.26613	-0.251974	-0.0813989	-0.372797	0.416938	0.0885567	-0.0437549	-0.368366	0.397731	0.249712	0.138242	0.729787	-0.583305	-0.674632	-0.208307	0.451283	0.397106	0.404335	-0.803003	0.503826	0.28566	0.792367
SLC22A1	-0.233765	-0.409459	-0.539991	-0.637822	-0.326606	-0.416074	-0.776094	-0.121847	-0.329035	-0.725434	-0.187604	-0.14336	-0.0523051	-0.41841	-0.431884	0.336555	-0.59341	-0.4021	-0.649381	-0.204433	-0.371044	-0.42606	-0.452597	-0.769146	-0.402562	-0.418471	0.0942344	-0.175621	-0.481386	-0.318938	-0.629206	0.193026	-0.14806	-0.335037	-0.184216	-0.134152	-0.0865608	-0.376168	0.230702	-0.515105	-0.734384	-0.167224	0.219508	-0.267006	-0.135847	-0.960472	-0.0488637	-0.237005	0.642114
CREB3L3	0.600305	0.199231	0.652115	-0.281072	0.443734	0.579752	-0.128701	0.116158	0.640333	0.568585	0.224928	0.21304	0.786078	0.258378	0.320172	-0.15619	0.448188	0.368924	0.159663	0.465811	-0.2336	0.708751	0.450684	0.237006	0.673644	0.638445	0.83714	0.38408	0.472862	-0.271946	0.0239821	0.472835	0.431951	0.837112	-0.0509033	0.699609	0.0355361	-0.316357	0.68103	0.10568	-0.00571667	0.627387	-0.0569878	0.610986	0.0541008	-0.149377	0.818898	0.792521	0.546035
PON1	-0.329218	-0.299863	-0.699842	-0.0459241	-0.166943	-0.543982	-0.56401	-0.0548862	-0.452205	-0.429879	-0.647411	-0.614281	-0.440886	-0.494309	-0.588105	-0.189351	0.0354243	-0.3311	-0.517033	0.0646837	-0.801892	-0.224325	-0.2422	-0.51844	-0.386865	-0.245355	-0.385578	-0.505981	-0.117841	-0.154611	-0.371115	-0.300877	-0.257316	-0.350663	0.285919	-0.665062	-0.395265	-0.71398	-0.592558	-0.095345	-0.212618	0.118665	-0.235675	-0.891466	-0.526318	-0.178221	-0.690471	-0.565977	-0.0854512
GPR182	-0.295025	-0.255792	-0.392342	-0.160586	-0.243655	-0.280141	-0.565582	0.0708497	-0.154264	-0.323144	-0.183088	-0.171232	-0.00361913	-0.109044	-0.383181	0.125707	0.0564243	-0.383776	-0.559982	0.237458	-0.634282	-0.091379	-0.305056	-0.516114	-0.0425119	-0.129973	0.150381	-0.145785	0.035373	0.0478172	-0.434048	-0.0438673	-0.0743238	-0.213699	0.0963595	-0.247133	-0.110855	-0.465538	-0.0337256	-0.508372	-0.563472	0.0720841	0.100864	-0.459434	0.0217616	-0.40207	-0.219992	-0.124262	0.38554
APOH	-0.00251181	-0.255743	0.406088	-0.126563	0.206863	0.813366	0.15085	0.485213	0.854462	0.249433	0.481537	0.380573	0.778371	0.53902	-0.0712332	-0.039619	0.168157	-0.193992	-0.00750443	0.748134	-0.035506	0.341134	-0.0842778	-0.0173011	0.301785	0.183994	0.826827	0.348356	0.0603235	-0.402816	-0.150503	0.655975	0.0300249	0.56061	-0.313104	0.690511	0.402393	-0.18446	0.574204	-0.287356	-0.410004	0.643302	0.0350245	0.342291	0.176975	-0.230684	0.77502	0.526446	0.764869
KLK4	-0.321831	-0.400387	-0.81545	-0.30116	-0.226671	-0.643496	-0.716893	-0.152134	-0.56279	-0.665549	-0.677259	-0.625911	-0.478607	-0.67314	-0.649122	-0.0797505	-0.29549	-0.369236	-0.605916	-0.14916	-0.72091	-0.407678	-0.340422	-0.689447	-0.585417	-0.407456	-0.41782	-0.542996	-0.385594	-0.345503	-0.504009	-0.189556	-0.306317	-0.433848	0.154317	-0.638108	-0.399506	-0.711578	-0.474784	-0.127126	-0.335066	0.00237228	-0.176134	-0.840682	-0.621286	-0.491176	-0.632913	-0.646311	0.0637353
NXPH2	-0.310747	-0.231121	-0.465295	-0.00970978	-0.188022	-0.342766	-0.500414	0.0609251	-0.226185	-0.267449	-0.353984	-0.341244	-0.161085	-0.187555	-0.438045	-0.0444136	0.184152	-0.346139	-0.504801	0.256434	-0.732107	-0.0682517	-0.238886	-0.445171	-0.0969106	-0.108532	-0.0488286	-0.272642	0.0848556	0.0461579	-0.353207	-0.191243	-0.126342	-0.233038	0.225245	-0.422869	-0.221316	-0.563486	-0.3032	-0.330423	-0.372646	0.138171	-0.0570809	-0.649949	-0.156058	-0.183546	-0.429193	-0.265603	0.136687
HSD17B6	-0.309963	-0.441972	-0.785298	-0.472107	-0.283738	-0.617312	-0.802695	-0.164147	-0.530897	-0.759635	-0.55204	-0.497528	-0.364308	-0.649998	-0.621628	0.075717	-0.462802	-0.408752	-0.670669	-0.206709	-0.632239	-0.464199	-0.414029	-0.783173	-0.584646	-0.458506	-0.269035	-0.453188	-0.479254	-0.383483	-0.596996	-0.0524423	-0.276593	-0.437436	0.0276725	-0.497765	-0.315402	-0.638037	-0.241561	-0.274946	-0.512014	-0.0725403	-0.0406433	-0.685273	-0.502905	-0.728081	-0.460097	-0.554113	0.290115
HPGD	-0.0571195	0.257225	0.253436	0.58225	0.339825	0.415075	0.118576	0.918284	0.520601	0.0595703	0.32708	0.547855	0.649735	0.685316	0.242523	0.620437	0.153052	0.00411751	0.0327099	0.353062	0.0370681	0.317343	0.0213342	0.00139063	0.325481	0.180302	0.55854	0.739562	0.231759	0.46889	0.302532	0.424208	0.491721	0.224371	0.47737	0.472982	0.640239	0.0997692	0.506299	-0.100194	-0.276742	0.316176	0.723362	0.0770205	0.51643	0.0307616	0.358942	0.37789	0.53685
IGSF10	-0.203903	0.0991219	0.152292	0.607603	-0.0703223	0.493349	0.65753	0.67128	0.423632	0.220104	-0.0776419	0.0458864	0.246535	0.492087	0.300819	0.0774306	0.101436	-0.00383528	0.653615	0.257244	0.146611	0.161924	-0.103412	0.537029	0.0254206	-0.0750079	0.0841298	0.458791	-0.0566891	0.546696	0.675649	-0.274233	0.306646	0.0085395	0.187061	0.480332	0.810093	0.165339	0.0906546	-0.00510338	-0.0523908	0.0139143	0.211854	-0.0102481	0.554535	0.415254	0.261788	0.338569	0.180105
P2RY12	0.797173	0.861071	0.841671	0.535767	0.909871	0.399839	0.109604	0.422913	0.493844	0.762959	0.306479	0.513865	0.701076	0.516832	0.737269	0.220565	0.730077	0.804559	0.34568	0.186686	0.0691707	0.913398	0.886001	0.500514	0.92217	0.939297	0.570354	0.723439	0.908964	0.375662	0.557075	0.418414	0.815229	0.831828	0.698959	0.477437	0.0321705	0.106694	0.500498	0.66605	0.60647	0.550917	0.368584	0.583282	0.15929	0.500528	0.457859	0.681501	-0.0710864
GPR87	0.745083	0.492336	0.798324	-0.0302969	0.698279	0.548831	-0.0952756	0.276006	0.636723	0.603274	0.386555	0.484065	0.878623	0.407424	0.535523	0.14135	0.462896	0.571886	0.181515	0.308979	-0.0168299	0.79618	0.640506	0.273218	0.810264	0.780377	0.861437	0.630929	0.621495	-0.0625115	0.19111	0.637009	0.644793	0.896383	0.222075	0.7231	0.0770207	-0.0815212	0.801075	0.310624	0.176576	0.605903	0.249075	0.741137	0.136442	-0.0337824	0.812917	0.817473	0.440002
CD86	0.894119	0.933199	0.827158	0.444535	0.798812	0.26157	0.108978	0.196669	0.317613	0.80562	0.142767	0.353066	0.545245	0.345204	0.848537	0.122928	0.706824	0.925661	0.489121	-0.00718099	0.0733912	0.891514	0.950375	0.641502	0.904565	0.937979	0.41594	0.640629	0.900761	0.465027	0.648946	0.169291	0.858419	0.761537	0.668736	0.434188	-0.0434124	0.138983	0.436821	0.731199	0.720663	0.358008	0.265267	0.633574	0.171947	0.543317	0.403912	0.699977	-0.214583
SERPINC1	0.0220865	-0.253759	0.385614	-0.156356	0.220723	0.782823	0.0955315	0.467602	0.830526	0.237134	0.434536	0.341981	0.771876	0.492894	-0.0837919	-0.0526511	0.170193	-0.179235	-0.0286595	0.736714	-0.0893682	0.351044	-0.0677588	-0.04013	0.296751	0.195231	0.822496	0.329858	0.063055	-0.429304	-0.168751	0.653387	0.0416933	0.571036	-0.291632	0.67376	0.366276	-0.240839	0.568833	-0.267598	-0.408786	0.662202	0.0200093	0.320232	0.130962	-0.260044	0.762335	0.51861	0.773196
PTPRO	0.442085	0.780619	0.510786	0.679041	0.639277	0.199028	0.0698618	0.690925	0.299222	0.306073	0.250084	0.589901	0.591665	0.552347	0.684424	0.694332	0.298862	0.556446	0.254643	-0.0563137	0.185887	0.553265	0.520831	0.281858	0.596707	0.533864	0.42972	0.873074	0.553285	0.712721	0.602661	0.323278	0.851274	0.384276	0.800286	0.436907	0.40049	0.288227	0.558994	0.386354	0.24377	0.18198	0.809674	0.363318	0.46503	0.265915	0.313288	0.499201	0.147831
TM4SF4	-0.0260315	-0.173168	0.0327083	-0.546779	-0.227521	0.0412542	-0.374415	-0.00769878	0.088612	-0.33559	0.3718	0.3816	0.376194	0.0812067	0.0170359	0.513142	-0.475919	-0.204227	-0.315514	-0.100388	0.138127	-0.172651	-0.287985	-0.386511	0.0261765	-0.166699	0.520192	0.26613	-0.251974	-0.0813989	-0.372797	0.416938	0.0885567	-0.0437549	-0.368366	0.397731	0.249712	0.138242	0.729787	-0.583305	-0.674632	-0.208307	0.451283	0.397106	0.404335	-0.803003	0.503826	0.28566	0.792367
DPYS	0.169356	-0.0242065	0.453778	-0.0956907	0.225036	0.72239	0.0805684	0.54132	0.763718	0.238015	0.341554	0.38213	0.844396	0.498314	0.202217	0.17588	0.0777753	0.0199881	0.167063	0.504501	-0.0183554	0.410657	0.0279719	0.105391	0.364265	0.235663	0.848372	0.57225	0.0740915	-0.124542	0.0786308	0.543865	0.354172	0.54935	-0.123858	0.847736	0.555206	-0.126549	0.779631	-0.201986	-0.396809	0.47562	0.269949	0.467646	0.362374	-0.300559	0.875295	0.700218	0.864989
BEND6	-0.0140086	0.349455	0.245151	0.69948	0.190485	0.399039	0.393656	0.818477	0.416033	0.215772	-0.000562667	0.244352	0.441202	0.565402	0.429435	0.379168	0.196409	0.161673	0.478654	0.209694	0.0556727	0.336385	0.0872966	0.403158	0.24802	0.141984	0.276078	0.684495	0.181698	0.688311	0.667918	-0.0528142	0.577313	0.138465	0.505078	0.499676	0.749914	0.132402	0.303835	0.0795584	-0.0465402	0.121704	0.52201	0.0496654	0.584147	0.323035	0.290658	0.431688	0.286964
CCL21	-0.281435	-0.157338	-0.413017	0.153337	-0.113862	-0.305206	-0.352769	0.0756148	-0.20599	-0.131532	-0.397929	-0.391657	-0.220142	-0.156294	-0.394794	-0.169021	0.33059	-0.268051	-0.381041	0.296353	-0.71677	0.00755298	-0.140755	-0.296106	-0.0577775	-0.0346481	-0.148288	-0.299635	0.180555	0.0948892	-0.221545	-0.284029	-0.12564	-0.189526	0.308815	-0.4772	-0.255091	-0.547295	-0.453889	-0.17507	-0.177869	0.192308	-0.15838	-0.690143	-0.210837	0.058174	-0.510991	-0.289251	-0.0686611
PAPPA2	0.377525	0.683147	0.511265	0.594633	0.251286	0.312368	0.449781	0.505634	0.278223	0.440933	-0.0025362	0.279178	0.412352	0.457311	0.839928	0.380442	0.20489	0.569865	0.778014	-0.148971	0.29792	0.466945	0.403641	0.726035	0.448001	0.351131	0.223944	0.784008	0.328745	0.859862	0.906766	-0.200108	0.823473	0.243976	0.506534	0.624569	0.655823	0.389885	0.462435	0.327934	0.278975	-0.126887	0.527235	0.45861	0.692794	0.426221	0.427595	0.653782	0.0757934
ART4	-0.00673997	0.104433	0.293542	0.47745	0.29414	0.621116	0.242499	0.815045	0.684191	0.326559	0.0564788	0.175666	0.640612	0.579069	0.155552	0.0801286	0.420212	0.0141328	0.257645	0.6513	-0.265955	0.500296	0.07725	0.239783	0.352221	0.271664	0.556894	0.530473	0.280995	0.236816	0.353023	0.203171	0.401141	0.421792	0.333532	0.544829	0.570517	-0.258239	0.315649	-0.0184844	-0.182176	0.573497	0.233364	-0.00744316	0.317588	0.197623	0.436943	0.496607	0.498812
GUCY2C	0.848841	0.790005	0.760671	0.17135	0.634775	0.323754	0.0609612	0.243605	0.347697	0.556103	0.151368	0.404082	0.655937	0.28701	0.873989	0.32804	0.264524	0.839281	0.542763	-0.183208	0.228502	0.701789	0.745298	0.551777	0.695308	0.697824	0.523386	0.769212	0.517799	0.364699	0.614592	0.279271	0.900343	0.675607	0.446451	0.715828	0.240458	0.203861	0.757865	0.557803	0.41909	0.184472	0.441604	0.797019	0.313301	0.132706	0.685073	0.79735	0.187343
CPA3	-0.101066	0.355443	-0.0428076	0.47253	0.16016	-0.197985	-0.138717	0.536855	-0.0974992	-0.320953	0.261518	0.534841	0.185014	0.339858	0.231234	0.910993	-0.216957	0.0255361	-0.209436	-0.272578	0.247034	-0.0817865	-0.0440796	-0.247638	0.0705952	-0.0490419	0.11518	0.548253	0.0618768	0.637532	0.168093	0.250942	0.395524	-0.231411	0.535163	0.0239262	0.358482	0.392015	0.332158	-0.0938149	-0.198748	-0.235838	0.90646	-0.0156508	0.461853	-0.119511	-0.0824191	-0.0270101	0.200302
ALDH1A2	0.755682	0.530785	0.789587	0.204645	0.663682	0.585276	0.196088	0.183298	0.611199	0.916464	0.0217341	0.0704419	0.63263	0.311963	0.555373	-0.370241	0.827749	0.68299	0.534328	0.449063	-0.221522	0.948125	0.779694	0.668311	0.818155	0.874153	0.556396	0.406461	0.773209	0.0265305	0.477312	0.154107	0.595174	0.927907	0.319921	0.570166	-0.0206588	-0.260678	0.338032	0.571078	0.535896	0.691586	-0.200711	0.515865	-0.0187535	0.484185	0.585158	0.778135	0.00658755
F7	-0.096149	-0.218782	-0.0673237	-0.531265	-0.264665	-0.0319751	-0.476128	0.0105458	0.0416458	-0.381441	0.289185	0.300921	0.337386	0.0461363	-0.079158	0.492418	-0.414041	-0.278267	-0.421783	-0.0317225	-0.0321824	-0.17778	-0.334174	-0.474808	0.0130566	-0.181944	0.504841	0.203363	-0.217857	-0.0614051	-0.442243	0.3641	0.0613061	-0.0920345	-0.307482	0.296712	0.197212	0.00952637	0.647918	-0.649859	-0.745566	-0.16954	0.430668	0.243805	0.368949	-0.821205	0.398806	0.226231	0.807565
F10	-0.321175	-0.401749	-0.815989	-0.306068	-0.227713	-0.644041	-0.718963	-0.153593	-0.563591	-0.669104	-0.675947	-0.624352	-0.477779	-0.674964	-0.649019	-0.0767947	-0.301622	-0.369605	-0.606951	-0.152842	-0.717966	-0.410487	-0.342046	-0.691905	-0.587838	-0.40988	-0.416756	-0.54223	-0.390067	-0.348399	-0.506101	-0.18654	-0.306487	-0.434621	0.151089	-0.635819	-0.398445	-0.710037	-0.470612	-0.128462	-0.33779	-4.14961e-05	-0.173996	-0.837614	-0.621167	-0.497205	-0.629911	-0.646093	0.0676143
PROZ	0.101249	-0.192898	0.564535	-0.13831	0.243152	0.857205	0.323981	0.279458	0.856029	0.431737	0.612792	0.430006	0.702459	0.550734	0.0126967	-0.197385	0.25934	-0.0853603	0.10351	0.707413	0.166324	0.375165	0.0403885	0.14892	0.386724	0.278835	0.751694	0.267026	0.154052	-0.455873	-0.111432	0.630157	-0.0556767	0.629672	-0.43762	0.656194	0.265417	-0.00247763	0.494926	-0.165836	-0.167621	0.599905	-0.127698	0.514858	0.138734	-0.0323461	0.775745	0.533595	0.502239
IL1RL1	-0.0806928	0.336066	-0.0180572	0.384125	0.122643	-0.157592	-0.140456	0.533946	-0.0681551	-0.350893	0.286818	0.566701	0.241858	0.339689	0.271751	0.959448	-0.317076	0.0279729	-0.171182	-0.314929	0.304277	-0.104373	-0.0750231	-0.241113	0.0530371	-0.0835463	0.175235	0.60171	-0.0151124	0.617006	0.170721	0.286018	0.427297	-0.223925	0.459097	0.134657	0.437753	0.426305	0.452638	-0.139498	-0.2692	-0.281524	0.951028	0.079025	0.524612	-0.224492	0.0339693	0.0437517	0.316643
STC2	-0.0615705	0.24397	0.322666	0.478406	0.164567	0.503856	0.369493	0.846135	0.519365	0.00726236	0.411396	0.631648	0.624398	0.697399	0.425505	0.711672	-0.178481	0.0400597	0.318249	0.0977444	0.438494	0.147103	-0.0748437	0.187591	0.181938	-0.0025077	0.493722	0.842707	-0.0509501	0.526549	0.469781	0.356325	0.505358	0.115093	0.22967	0.704828	0.902573	0.433647	0.676627	-0.132895	-0.292529	0.00247134	0.799448	0.353211	0.740918	-0.0371952	0.565058	0.472097	0.590055
GRTP1	0.145055	0.0473601	0.628314	0.295822	0.276111	0.937881	0.595967	0.520489	0.910609	0.69466	0.295931	0.224191	0.687667	0.659435	0.261306	-0.312425	0.559517	0.109635	0.533944	0.781521	0.0145991	0.611764	0.196308	0.573233	0.504531	0.406989	0.631171	0.423153	0.348429	-0.00985372	0.384546	0.21435	0.2326	0.659929	-0.0897477	0.735482	0.495119	-0.0688271	0.334981	0.046198	0.0494621	0.620628	-0.145998	0.379873	0.314818	0.408164	0.70663	0.695294	0.33033
C8B	-0.0577594	-0.364076	0.229295	-0.227668	0.158552	0.6845	-0.0131073	0.42357	0.740255	0.122277	0.308395	0.20547	0.670871	0.364458	-0.23045	-0.113735	0.119809	-0.271723	-0.133827	0.736354	-0.224887	0.26554	-0.149596	-0.1605	0.172097	0.105078	0.736723	0.197601	-0.0248802	-0.528307	-0.275926	0.608324	-0.0540543	0.490722	-0.303636	0.552355	0.2876	-0.383343	0.455689	-0.302936	-0.473471	0.67335	-0.0593209	0.155739	-6.73808e-05	-0.3412	0.645917	0.389969	0.777447
C8A	-0.274535	-0.358475	-0.798405	-0.241018	-0.165265	-0.639218	-0.607649	-0.185856	-0.587739	-0.618648	-0.731537	-0.678916	-0.560344	-0.720755	-0.615995	-0.16686	-0.298509	-0.287479	-0.491973	-0.218436	-0.639469	-0.410083	-0.26909	-0.589397	-0.636724	-0.400151	-0.546871	-0.583938	-0.412224	-0.38647	-0.407823	-0.234522	-0.326034	-0.418028	0.177444	-0.673712	-0.433472	-0.673855	-0.5796	0.04623	-0.160399	0.00205852	-0.261083	-0.840876	-0.726923	-0.363879	-0.6846	-0.705318	-0.102219
APOB	0.0422047	-0.18421	0.426824	-0.0761504	0.297188	0.79353	0.121149	0.542173	0.848605	0.226508	0.513679	0.452451	0.812507	0.559543	-0.0318627	0.0602885	0.145508	-0.141693	-0.0315564	0.695848	0.0064407	0.357217	-0.0349835	-0.0467099	0.319331	0.215444	0.839875	0.416679	0.07981	-0.380572	-0.127607	0.73634	0.0905761	0.582061	-0.225469	0.694048	0.405418	-0.149619	0.619304	-0.220973	-0.375244	0.657642	0.132978	0.363397	0.164073	-0.240636	0.773862	0.517217	0.763097
MYO5C	0.4332	0.518195	0.559435	0.529429	0.365613	0.533593	0.484674	0.468437	0.499636	0.702769	-0.180935	-0.0129756	0.461756	0.393684	0.643983	-0.147623	0.559837	0.550222	0.821613	0.264964	-0.0674657	0.69962	0.503129	0.820946	0.521654	0.519224	0.288712	0.553646	0.466485	0.492393	0.830098	-0.221373	0.678588	0.531774	0.434548	0.612653	0.463775	-0.0491544	0.241862	0.455522	0.394811	0.320736	0.0430771	0.309022	0.342008	0.590535	0.455785	0.695159	0.0255604
NTS	-0.053994	0.357458	-0.0318249	0.342312	0.0910633	-0.223015	-0.161919	0.453005	-0.142158	-0.366743	0.260386	0.54209	0.186408	0.280128	0.297868	0.961698	-0.354095	0.0586768	-0.160163	-0.401571	0.329264	-0.135088	-0.062651	-0.231241	0.0363687	-0.0957368	0.123559	0.574503	-0.0303742	0.634774	0.173407	0.236911	0.429828	-0.261034	0.444939	0.104954	0.399985	0.458476	0.44263	-0.126315	-0.241641	-0.358637	0.943284	0.100935	0.522834	-0.237761	0.00731869	0.0275152	0.272149
FGF7	0.350283	0.560273	0.433547	0.648212	0.359872	0.366265	0.365994	0.532381	0.370711	0.59074	-0.227449	-0.00980473	0.385579	0.383447	0.592119	-0.0115621	0.574805	0.5021	0.675596	0.223441	-0.158809	0.65027	0.468123	0.692809	0.4992	0.488193	0.21687	0.551192	0.513363	0.638581	0.798128	-0.261701	0.69958	0.40584	0.607822	0.446914	0.422872	-0.0688159	0.15858	0.416686	0.352364	0.272813	0.169895	0.137128	0.355368	0.592601	0.265541	0.572421	-0.01976
CLEC4F	0.931855	0.819166	0.713481	0.268974	0.74325	0.161771	0.0287482	-0.0517627	0.195843	0.832845	-0.10662	0.0374902	0.3545	0.0760392	0.707928	-0.210727	0.764817	0.930516	0.48855	-0.00384365	-0.132984	0.875311	0.979091	0.650606	0.80279	0.928534	0.245219	0.353641	0.862973	0.234476	0.556083	0.00126959	0.710664	0.768365	0.58103	0.270956	-0.287827	-0.103393	0.200011	0.827714	0.827007	0.414897	-0.0815959	0.494368	-0.121631	0.563217	0.269769	0.583612	-0.369351
PNPLA1	-0.375948	-0.243724	-0.556212	0.14347	-0.0615975	-0.394059	-0.452514	0.125615	-0.274427	-0.335607	-0.372047	-0.352566	-0.282311	-0.216041	-0.555396	-0.065713	0.171692	-0.36967	-0.573322	0.237467	-0.688044	-0.137667	-0.226508	-0.520161	-0.223203	-0.151681	-0.222628	-0.358995	0.0408248	-0.0555532	-0.362477	-0.123993	-0.240383	-0.272303	0.333898	-0.608072	-0.313677	-0.567143	-0.512211	-0.159026	-0.226451	0.219886	-0.0924796	-0.819505	-0.376152	-0.0619788	-0.629201	-0.499717	-0.0644595
CENPK	0.483831	0.576993	0.476207	0.352689	0.74774	0.267415	-0.117265	0.633605	0.382506	0.143228	0.348307	0.638008	0.694238	0.430112	0.480739	0.674689	0.0782412	0.46963	0.0335115	-0.0351119	0.198646	0.467861	0.463909	0.0108834	0.46119	0.472359	0.557642	0.784255	0.345053	0.209612	0.301527	0.702763	0.689992	0.509903	0.592692	0.492579	0.283196	0.144764	0.693878	0.390578	0.125494	0.369552	0.741408	0.428944	0.165179	-0.0780023	0.464125	0.422108	0.363947
COL12A1	0.666437	0.726056	0.64307	0.407889	0.377622	0.313783	0.350859	0.169706	0.277406	0.772379	-0.199016	-0.0138114	0.3629	0.241237	0.830809	-0.113995	0.582567	0.775064	0.835597	-0.00465905	-0.00961104	0.740251	0.694257	0.887601	0.653268	0.653814	0.217182	0.528887	0.612187	0.606717	0.849333	-0.326777	0.792989	0.528967	0.472124	0.532452	0.248722	0.0679129	0.284254	0.55737	0.569616	0.124644	0.0554217	0.485641	0.356774	0.593055	0.408726	0.741531	-0.153232
HTR1B	-0.30408	-0.205189	-0.479018	0.0745068	-0.148642	-0.357287	-0.439243	0.0544815	-0.25104	-0.221076	-0.426052	-0.413787	-0.235306	-0.216535	-0.444555	-0.133539	0.248159	-0.30893	-0.449794	0.257758	-0.749443	-0.0495569	-0.190827	-0.383323	-0.117271	-0.0891475	-0.150507	-0.325396	0.111466	0.0464266	-0.291291	-0.261341	-0.146671	-0.230432	0.284344	-0.495145	-0.268527	-0.587665	-0.432107	-0.220402	-0.252214	0.168238	-0.138313	-0.719406	-0.240199	-0.0543614	-0.519278	-0.325539	-0.00325738
RAB6B	-0.0629446	0.31146	0.27994	0.477961	0.302702	0.230846	0.169191	0.673321	0.300424	-0.140663	0.701796	0.888881	0.48189	0.667425	0.308428	0.919467	-0.218942	0.0154134	-0.0942309	-0.0684255	0.612922	0.00690773	-0.0250523	-0.130936	0.202013	0.0292535	0.397634	0.730053	0.0580806	0.447458	0.183809	0.617411	0.337201	0.0179179	0.285089	0.34946	0.54422	0.642316	0.584681	-0.106206	-0.183518	-0.0663586	0.932321	0.341208	0.577348	-0.072018	0.291911	0.172737	0.331827
CDK15	-0.289978	-0.176727	-0.419022	0.10631	-0.13731	-0.308069	-0.394966	0.0765565	-0.202323	-0.165321	-0.372363	-0.365052	-0.19029	-0.152225	-0.401844	-0.125436	0.293962	-0.292719	-0.418429	0.293575	-0.719694	-0.00818831	-0.170361	-0.33818	-0.0566274	-0.0507625	-0.1036	-0.281659	0.161283	0.0894618	-0.260728	-0.251818	-0.120225	-0.197695	0.28162	-0.450977	-0.237655	-0.546508	-0.396564	-0.232632	-0.243906	0.177316	-0.120262	-0.668626	-0.178189	-0.0145361	-0.47573	-0.269249	0.0028401
GALNT3	0.551845	0.791112	0.492321	0.334617	0.495816	-0.0261441	-0.105766	0.322726	0.0519664	0.170238	0.318179	0.631448	0.468959	0.340044	0.749679	0.797823	0.0356092	0.613621	0.166708	-0.401168	0.365802	0.379546	0.508798	0.187252	0.541805	0.459223	0.368419	0.789504	0.433677	0.654532	0.448537	0.32067	0.811845	0.263756	0.591207	0.395179	0.243964	0.46985	0.692223	0.30709	0.213709	-0.131767	0.84659	0.582955	0.490263	0.00790049	0.340297	0.473669	0.137554
SLC38A11	-0.301733	-0.224567	-0.417823	-0.0332364	-0.198522	-0.302738	-0.498626	0.075892	-0.182915	-0.254963	-0.282672	-0.272701	-0.0963086	-0.133864	-0.4044	0.00508134	0.175989	-0.3506	-0.507264	0.272702	-0.696444	-0.0529748	-0.24778	-0.443984	-0.0508396	-0.0947475	0.0291182	-0.217721	0.0989206	0.0699631	-0.361644	-0.148367	-0.0994082	-0.212434	0.191245	-0.355942	-0.1772	-0.520229	-0.214723	-0.387495	-0.42258	0.126523	-0.00565075	-0.577524	-0.0767216	-0.222432	-0.35369	-0.200046	0.207783
RTN1	-0.159666	-0.281382	0.278671	-0.102974	0.161588	0.645169	0.00774925	0.543895	0.728088	-0.0137111	0.674783	0.602644	0.743395	0.594302	-0.161661	0.298076	-0.0266103	-0.345086	-0.296087	0.626635	0.0920237	0.14128	-0.236234	-0.305782	0.219017	0.0443465	0.822769	0.394557	-0.018633	-0.319809	-0.323368	0.821038	-0.0329829	0.36029	-0.280527	0.555244	0.408178	-0.00984712	0.636553	-0.466888	-0.587242	0.491159	0.323225	0.286445	0.272237	-0.408265	0.653189	0.356189	0.829346
FGL2	0.0714199	0.410517	0.341205	0.686235	0.186243	0.424368	0.428454	0.728576	0.433041	0.360831	-0.00361769	0.215846	0.45215	0.57444	0.509731	0.278985	0.329573	0.240687	0.557917	0.243521	0.029272	0.435323	0.175021	0.523863	0.369286	0.246853	0.303754	0.674336	0.306975	0.738881	0.715119	-0.136656	0.617197	0.2072	0.487013	0.525647	0.698845	0.136075	0.30206	0.099763	0.0316312	0.123991	0.438211	0.128587	0.625885	0.416415	0.326351	0.530595	0.222537
FABP7	0.374838	0.502393	0.53819	0.357937	0.0565171	0.415195	0.591497	0.229113	0.310568	0.576495	-0.0855521	0.0590605	0.307513	0.332578	0.783812	-0.00359769	0.234857	0.526858	0.945367	-0.0719593	0.281934	0.443652	0.355276	0.89716	0.394312	0.304934	0.160133	0.557416	0.241965	0.657912	0.869861	-0.392647	0.636937	0.273478	0.171563	0.667551	0.5863	0.326312	0.351615	0.276522	0.315632	-0.155414	0.143053	0.530406	0.626506	0.472071	0.507961	0.707513	0.00869115
PKIB	0.600242	0.572862	0.865207	0.425804	0.839486	0.687348	0.177031	0.568506	0.789437	0.734109	0.536345	0.638248	0.901967	0.70845	0.528316	0.169625	0.70531	0.524984	0.219335	0.527262	0.0660166	0.880021	0.665975	0.365623	0.89829	0.84682	0.826835	0.722951	0.800907	0.129821	0.346744	0.664135	0.621489	0.90942	0.426497	0.638962	0.174911	0.0439109	0.619437	0.38687	0.316558	0.74795	0.318895	0.601265	0.209805	0.348541	0.668313	0.742334	0.234419
GC	0.031869	-0.238153	0.383165	-0.188812	0.203942	0.75762	0.0756698	0.461607	0.802748	0.186795	0.459291	0.384805	0.779553	0.48495	-0.0501776	0.0292766	0.0845265	-0.169249	-0.030794	0.658701	-0.027094	0.311657	-0.0834692	-0.0605209	0.275612	0.16429	0.828537	0.369288	0.0158882	-0.407029	-0.167076	0.676996	0.0686902	0.54053	-0.304875	0.703828	0.400643	-0.182063	0.634823	-0.285623	-0.439343	0.59451	0.0924009	0.369305	0.174355	-0.325727	0.792394	0.527321	0.81379
ALB	0.0681652	-0.193728	0.433314	-0.126964	0.271629	0.794371	0.115943	0.490169	0.841293	0.251274	0.47523	0.403132	0.802367	0.521446	-0.0227018	0.00469875	0.154127	-0.125189	5.199e-05	0.692183	-0.0200137	0.369527	-0.0244067	-0.0153654	0.323575	0.223601	0.83681	0.389634	0.0775883	-0.400854	-0.125538	0.694632	0.0908439	0.59558	-0.260054	0.708856	0.388006	-0.178913	0.617912	-0.219535	-0.368316	0.650428	0.078941	0.381243	0.153824	-0.247958	0.793908	0.543791	0.764243
CPS1	0.0706013	-0.240365	0.394066	-0.201695	0.272672	0.746786	0.0441227	0.41051	0.800403	0.227734	0.457563	0.358458	0.758259	0.449804	-0.0974303	-0.0546847	0.158993	-0.149056	-0.0814817	0.698359	-0.0735564	0.348324	-0.0265362	-0.0832312	0.300288	0.222143	0.812894	0.298965	0.074251	-0.502598	-0.220076	0.714172	0.0214716	0.596895	-0.294337	0.633971	0.278931	-0.242013	0.566123	-0.218684	-0.363695	0.680393	0.00506169	0.342506	0.0503219	-0.285323	0.745323	0.483261	0.735037
AFM	0.520786	0.389264	0.738765	0.179096	0.612936	0.713118	0.0553971	0.573827	0.805808	0.596762	0.363688	0.474361	0.96253	0.60264	0.46527	0.15629	0.529095	0.39558	0.241297	0.550141	-0.109313	0.805672	0.47582	0.306806	0.775044	0.688317	0.92683	0.719374	0.586641	0.0761019	0.281573	0.573247	0.643766	0.844987	0.269156	0.807228	0.343607	-0.143681	0.767647	0.155911	0.00183614	0.689415	0.304807	0.573396	0.303657	0.0484703	0.83082	0.855169	0.587517
CXCL8	-0.0235039	0.241662	0.255955	0.192897	-0.198918	0.263118	0.341412	0.409207	0.211271	-0.0300537	0.271443	0.449521	0.367511	0.445493	0.55248	0.637243	-0.349588	0.0892228	0.457377	-0.232376	0.525527	-0.0230954	-0.136154	0.318663	0.107524	-0.12991	0.2981	0.6897	-0.165769	0.679384	0.487504	-0.0310369	0.481913	-0.116759	-0.0082476	0.658456	0.835319	0.591488	0.663058	-0.272956	-0.306014	-0.456299	0.688984	0.492298	0.912033	-0.125696	0.528724	0.505876	0.48558
CPN2	-0.262675	-0.376866	-0.797424	-0.31702	-0.181874	-0.639839	-0.6366	-0.204998	-0.591883	-0.668225	-0.6997	-0.643929	-0.537144	-0.738294	-0.607917	-0.115167	-0.390436	-0.292819	-0.506415	-0.270489	-0.588603	-0.448709	-0.293863	-0.624299	-0.664518	-0.43327	-0.518302	-0.56301	-0.475882	-0.425239	-0.439122	-0.182689	-0.323806	-0.425471	0.123871	-0.628063	-0.410091	-0.642764	-0.503011	0.0179851	-0.207777	-0.0356668	-0.221077	-0.782343	-0.711766	-0.45848	-0.627047	-0.690711	-0.0338292
PLEK2	0.5225	0.442781	0.770909	0.361544	0.668858	0.794383	0.278785	0.652841	0.848088	0.688759	0.286129	0.413169	0.904752	0.635647	0.529079	0.057775	0.570968	0.468932	0.454742	0.543949	-0.0236546	0.83447	0.532675	0.494603	0.727117	0.688085	0.794225	0.733217	0.566022	0.122069	0.486267	0.471309	0.657937	0.860692	0.336621	0.821425	0.423674	-0.0950789	0.638932	0.338193	0.18402	0.70962	0.23215	0.540011	0.267615	0.274139	0.791316	0.830775	0.421443
WNT2	-0.0155873	0.453058	0.0473978	0.615357	0.195094	-0.0783713	-0.0199707	0.630423	0.0101315	-0.0965865	0.0702026	0.374363	0.248015	0.384517	0.35634	0.735814	0.0223025	0.148377	0.0397392	-0.134117	0.072068	0.131971	0.0773959	0.0112067	0.198403	0.088944	0.141739	0.610317	0.212237	0.781789	0.401468	0.0456249	0.55613	-0.105809	0.664702	0.135621	0.448487	0.246387	0.285947	0.0146759	-0.0945228	-0.121994	0.795208	-0.0450455	0.515691	0.0918783	-0.0261708	0.150314	0.174427
AOAH	0.850044	0.950872	0.661658	0.436384	0.722532	0.0711345	-0.053281	0.213622	0.146266	0.63565	-0.0218683	0.263317	0.461722	0.227278	0.83259	0.255987	0.59263	0.905797	0.419962	-0.150588	-0.036828	0.803678	0.888738	0.536355	0.805415	0.844999	0.330402	0.643475	0.824649	0.583641	0.645815	0.0668768	0.928673	0.612267	0.789192	0.351909	-0.0261533	0.0728192	0.425383	0.688403	0.623009	0.235579	0.384385	0.499287	0.190964	0.420013	0.289151	0.624855	-0.159469
SCG2	-0.175521	-0.367472	-0.414841	-0.666348	-0.310529	-0.318184	-0.698831	-0.114945	-0.24542	-0.672477	-0.051023	-0.011741	0.0469961	-0.329414	-0.326327	0.401858	-0.634758	-0.354513	-0.575665	-0.227329	-0.216431	-0.399898	-0.42727	-0.701263	-0.336524	-0.387617	0.191596	-0.070584	-0.481066	-0.300562	-0.58617	0.273242	-0.098016	-0.276305	-0.259603	0.00855491	-0.00155391	-0.239525	0.380962	-0.530753	-0.736276	-0.203199	0.28845	-0.082796	-0.0210919	-0.980703	0.105075	-0.121211	0.705033
GLRB	-0.238109	0.172612	0.114783	0.600463	-0.103511	0.363913	0.569758	0.720913	0.309587	0.00440394	0.0818883	0.278572	0.265147	0.535068	0.381136	0.458817	-0.165421	-0.0191735	0.542911	0.0113737	0.372494	0.00356883	-0.182528	0.387378	-0.0311705	-0.186293	0.101441	0.6171	-0.16907	0.697504	0.648494	-0.146606	0.383892	-0.146913	0.219399	0.501617	0.918817	0.415864	0.285893	-0.105635	-0.178796	-0.218965	0.555596	0.0926679	0.735928	0.220438	0.277354	0.300652	0.288135
TDO2	-0.198855	-0.266378	-0.22244	-0.440566	-0.29278	-0.147659	-0.5837	0.0390503	-0.0401949	-0.409412	0.118662	0.132115	0.23249	-0.0168255	-0.226549	0.397989	-0.262029	-0.364977	-0.543482	0.0843421	-0.306418	-0.164288	-0.368513	-0.560628	-0.00998063	-0.184463	0.417661	0.0758173	-0.135327	-0.0211921	-0.501275	0.233	0.00925138	-0.159575	-0.170202	0.0951995	0.0871943	-0.201898	0.434483	-0.678628	-0.769716	-0.0853574	0.344014	-0.036599	0.265759	-0.749912	0.178198	0.101326	0.733044
PALS2	0.332232	0.297131	0.655504	0.238895	0.291244	0.697199	0.247975	0.480889	0.739113	0.663475	0.237143	0.28654	0.783968	0.61009	0.461709	-0.0215892	0.607987	0.274836	0.414124	0.607723	-0.156885	0.731156	0.325561	0.494582	0.72701	0.564006	0.776826	0.601062	0.56551	0.306627	0.388782	0.167708	0.555213	0.649864	0.149203	0.753677	0.444179	-0.0974552	0.57726	-0.0327096	-0.0514661	0.484502	0.146713	0.465668	0.51709	0.226928	0.726224	0.866206	0.479853
STK31	0.980533	0.833896	0.738293	0.119157	0.710456	0.115628	-0.107046	-0.102062	0.166236	0.752276	-0.00944085	0.150185	0.433478	0.0678021	0.753982	-0.0485004	0.645125	0.934073	0.396459	-0.0967003	-0.0811488	0.841364	0.955841	0.551597	0.839066	0.920643	0.362262	0.427906	0.835643	0.241977	0.465165	0.105353	0.767555	0.758277	0.520537	0.346715	-0.274617	-0.0393501	0.398532	0.715645	0.699497	0.326503	0.0591912	0.628374	-0.0241971	0.357322	0.378614	0.655806	-0.209192
ADAM22	-0.319976	-0.286681	-0.697916	-0.0170857	-0.148498	-0.544601	-0.532208	-0.0606056	-0.459576	-0.410413	-0.669398	-0.636369	-0.467882	-0.50545	-0.582807	-0.221851	0.0507164	-0.309826	-0.486357	0.0557486	-0.792063	-0.219012	-0.219987	-0.487865	-0.396829	-0.238519	-0.425746	-0.52209	-0.114181	-0.159164	-0.341679	-0.322712	-0.263756	-0.346408	0.302269	-0.684603	-0.409591	-0.7119	-0.635403	-0.0452334	-0.159238	0.125538	-0.265736	-0.904714	-0.558486	-0.128964	-0.71639	-0.585936	-0.141205
IGFBP1	-0.258401	-0.43678	-0.735383	-0.558855	-0.278342	-0.583197	-0.775706	-0.198129	-0.516326	-0.789122	-0.483222	-0.425906	-0.328863	-0.658695	-0.563691	0.134375	-0.596333	-0.371028	-0.624582	-0.30557	-0.485704	-0.505832	-0.412543	-0.770238	-0.615669	-0.488079	-0.243744	-0.404565	-0.570342	-0.441329	-0.589248	0.0261012	-0.26347	-0.421476	-0.0590333	-0.402596	-0.268043	-0.53826	-0.127972	-0.256551	-0.513102	-0.133509	0.00495836	-0.547063	-0.480824	-0.812659	-0.351341	-0.516218	0.342119
HPD	0.0061323	-0.299686	0.342734	-0.214696	0.183849	0.756066	0.0848002	0.415097	0.79319	0.196872	0.400584	0.29526	0.722577	0.43131	-0.120531	-0.0870644	0.113167	-0.2007	-0.034213	0.700835	-0.0849245	0.299345	-0.0981494	-0.0602589	0.232676	0.146816	0.775644	0.274392	-0.00318525	-0.488594	-0.199474	0.634686	-0.00667579	0.539081	-0.342182	0.649065	0.342643	-0.255052	0.538744	-0.269131	-0.415099	0.634234	-0.0257053	0.303114	0.0834511	-0.29617	0.743657	0.47599	0.762965
HECW1	-0.261394	-0.274841	-0.326065	-0.312775	-0.28183	-0.227088	-0.604989	0.0583076	-0.103956	-0.384607	-0.0380273	-0.0247213	0.11732	-0.0675383	-0.323224	0.27209	-0.103949	-0.394564	-0.581331	0.171547	-0.499846	-0.133649	-0.353853	-0.566429	-0.0280856	-0.164848	0.295511	-0.0398571	-0.0503187	0.0149589	-0.491646	0.0958396	-0.0354039	-0.197309	-0.0352656	-0.0846622	-0.0151507	-0.355067	0.204686	-0.622785	-0.699282	-0.00485103	0.230979	-0.266966	0.148099	-0.601931	-0.0274196	-0.0151438	0.584348
[truncated: 7 more columns]

## Sheet: GeneCorMet_abdominal.p
	23-Nordeoxycholic acid	L-Tryptophan	PC (18:0/20:4)	11(E)-Eicosenoic Acid	10-Hydroxydecanoic acid	PC (18:0/20:3)	SM (d14:1/20:0)	PC (16:0/16:1)	PC (18:0/22:4)	2-(3,4-dimethoxyphenyl)ethanamine	PC (16:0/18:1)	PC (16:1e/18:2)	PC (18:1e/18:2)	methadone-d9	(2R,3S,4S,5R,6R)-2-(hydroxymethyl)-6-(propan-2-yloxy)oxane-3,4,5-triol	PC (16:1e/19:2)	ACar 15:1	Biliverdin	Bicyclo prostaglandin E2	2-(2-amino-3-methylbutanamido)-3-phenylpropanoic acid	PC (17:0/18:2)	ACar 20:1	Palmitoylcarnitine	cis-gondoic acid	ACar 20:0	ACar 18:0	16-Heptadecyne-1,2,4-triol	5-OxoETE	ACar 18:1	PC (18:1e/14:1)	9-Oxo-ODE	PC (18:3e/20:2)	PC (20:0/20:3)	Prostaglandin E2	2-[(3S)-1-(2-Methylbenzyl)-3-pyrrolidinyl]-1H-imidazo[4,5-b]pyridine	4,6,8-trihydroxy-7-methoxy-3-methyl-3,4-dihydro-1H-2-benzopyran-1-one	PC (14:1e/19:2)	PC (18:3e/15:0)	Radicinin	PC (14:0e/18:0)	PC (18:1e/16:2)	ACar 13:0	PC (19:1/18:2)	PC (18:5e/4:0)	PC (20:5e/15:1)	DL-Dipalmitoylphosphatidylcholine	2-(2,4-dihydroxyphenyl)-3,5,7-trihydroxy-4H-chromen-4-one	4-morpholino-3-nitrobenzene-1-sulfonamide	PC (18:4e/17:1)
APOF	0.468383	0.571301	0.311411	0.850925	0.606978	0.47581	0.180295	0.860734	0.680853	0.499461	0.553316	0.571119	0.881867	0.766789	0.32707	0.908165	0.752496	0.374013	0.176874	0.531346	0.0644157	0.874172	0.51739	0.236344	0.909881	0.798705	0.862714	0.647118	0.857275	0.883391	0.338999	0.793088	0.830463	0.610349	0.70877	0.441774	0.715445	0.203144	0.722599	0.282584	0.232403	0.799952	0.937956	0.168736	0.922563	0.487029	0.459065	0.680723	0.511553
COL28A1	0.947429	0.288954	0.632145	0.108131	0.60867	0.708428	0.683128	0.0277926	0.604724	0.840854	0.436792	0.103886	0.285558	0.130439	0.26401	0.00515123	0.762295	0.763202	0.722502	0.78442	0.370556	0.798846	0.961065	0.862878	0.627644	0.919037	0.468323	0.0181551	0.822698	0.0337123	0.251486	0.552939	0.137487	0.928059	0.197743	0.328772	0.0586042	0.240004	0.184247	0.922687	0.691499	0.745494	0.000744188	0.640758	0.0592136	0.941164	0.566118	0.493932	0.402899
CXCL13	0.894695	0.428658	0.559818	0.495879	0.619881	0.139145	0.734957	0.375779	0.0745856	0.997394	0.145577	0.256949	0.0618055	0.319331	0.551487	0.76797	0.984109	0.467888	0.359009	0.102424	0.90136	0.690012	0.700601	0.369403	0.62933	0.813918	0.0203484	0.581792	0.990294	0.162493	0.260845	0.00996712	0.81229	0.279259	0.432416	0.245934	0.664934	0.646701	0.146423	0.355504	0.187911	0.127015	0.753504	0.543343	0.949697	0.233159	0.106602	0.466642	0.0234023
FGD2	0.00473573	0.00715272	0.0242388	0.281998	0.0143366	0.499141	0.848073	0.66638	0.403483	0.00668805	0.967075	0.646585	0.196672	0.498139	0.0393898	0.862713	0.0100018	0.0034367	0.245692	0.746592	0.774675	0.000396164	0.000191905	0.0905328	0.00299096	9.18766e-05	0.340546	0.191542	0.000572159	0.399924	0.115385	0.786491	0.0210096	0.0140332	0.0654824	0.37933	0.744514	0.875407	0.479153	0.0276425	0.0343578	0.198325	0.849457	0.216158	0.969582	0.116766	0.414283	0.076775	0.546228
TMIGD3	0.00395149	0.000933236	0.0255669	0.263859	0.0458762	0.560579	0.731104	0.631314	0.506671	0.0184266	0.957169	0.608625	0.215325	0.505072	0.00367177	0.863643	0.069596	0.000458842	0.103081	0.896929	0.966062	0.00443227	0.00105635	0.0399273	0.00989638	0.0038835	0.408892	0.0915604	0.0112391	0.174157	0.0309577	0.989172	0.00198518	0.0494182	0.0612136	0.243217	0.928819	0.839243	0.324984	0.0334315	0.0473759	0.481807	0.587518	0.129593	0.632367	0.152107	0.32969	0.0431078	0.62998
SLC8A3	0.629674	0.605859	0.907902	0.269116	0.774235	0.952443	0.852892	0.0596846	0.866578	0.383975	0.461918	0.146719	0.455659	0.283375	0.710319	0.00172669	0.505144	0.813147	0.640145	0.775101	0.574413	0.818777	0.689892	0.50423	0.969808	0.763533	0.567213	0.114911	0.901411	0.163044	0.742653	0.401149	0.385772	0.639612	0.282419	0.684374	0.178497	0.418348	0.297889	0.619367	0.372207	0.740422	0.00136986	0.9598	0.196222	0.613258	0.885254	0.938018	0.308137
JAKMIP2	0.711813	0.550361	0.711268	0.217418	0.492628	0.817155	0.161149	0.949582	0.992672	0.319895	0.637938	0.61567	0.494554	0.97869	0.697584	0.26496	0.415781	0.420479	0.208094	0.93739	0.655387	0.680952	0.380807	0.174029	0.999513	0.65758	0.245273	0.749791	0.677874	0.92541	0.223883	0.475085	0.938146	0.755172	0.574122	0.655111	0.743183	0.795268	0.167418	0.0641248	0.0242338	0.767759	0.339511	0.832701	0.443172	0.0178862	0.499216	0.705274	0.0220907
KCNK12	0.0215982	0.00401057	0.0556504	0.267224	0.197043	0.663902	0.516969	0.831917	0.690605	0.0231499	0.795502	0.812086	0.433618	0.601999	0.00226602	0.993968	0.11336	0.00252957	0.0335685	0.727233	0.842942	0.0294728	0.0109125	0.00894575	0.0393437	0.0312537	0.680954	0.160537	0.0405222	0.0831236	0.0106894	0.563008	0.00947364	0.164862	0.128441	0.300333	0.829276	0.66597	0.494482	0.0634372	0.0448023	0.844549	0.729167	0.157665	0.469378	0.0932545	0.44207	0.063998	0.45461
CLEC9A	0.481208	0.661204	0.299409	0.840928	0.727719	0.457115	0.309643	0.856599	0.63454	0.669984	0.38087	0.391951	0.67567	0.722858	0.320944	0.803009	0.506531	0.465852	0.282763	0.483432	0.0443542	0.971639	0.664414	0.386839	0.895262	0.891939	0.844013	0.512979	0.718718	0.837995	0.505938	0.572075	0.781652	0.633475	0.519603	0.277428	0.584809	0.162632	0.366651	0.5381	0.513797	0.686907	0.808042	0.0764448	0.699198	0.912657	0.252671	0.534462	0.935458
GPR37	0.225985	0.506114	0.270564	0.613567	0.946108	0.523472	0.394732	0.549201	0.75909	0.311057	0.816884	0.861907	0.725535	0.900372	0.119809	0.641718	0.895093	0.213195	0.0295514	0.49842	0.423786	0.570295	0.450528	0.0621955	0.648588	0.648745	0.858255	0.582222	0.971316	0.783753	0.206086	0.536675	0.379404	0.516067	0.597767	0.1424	0.564266	0.563472	0.385713	0.506386	0.466877	0.591539	0.743969	0.0777285	0.531189	0.793014	0.165122	0.15414	0.981335
CHIA	0.73035	0.399283	0.0926868	0.215658	0.681569	0.189484	0.149642	0.549465	0.200829	0.0583539	0.226562	0.293749	0.33246	0.0618103	0.26854	0.919284	0.0872662	0.613092	0.325547	0.278028	0.543321	0.207405	0.490261	0.136018	0.073994	0.248268	0.34508	0.322431	0.0994605	0.205626	0.307095	0.979278	0.527268	0.378595	0.857838	0.372971	0.522691	0.338917	0.648615	0.989015	0.561732	0.702249	0.846123	0.291871	0.134151	0.0897166	0.422537	0.169294	0.76567
KLRF2	0.951213	0.681743	0.938716	0.160799	0.587891	0.922736	0.360822	0.985565	0.83472	0.416416	0.364456	0.350926	0.35836	0.848405	0.968064	0.193414	0.23324	0.627588	0.4465	0.813034	0.744287	0.682656	0.48914	0.344234	0.950941	0.693182	0.186311	0.524067	0.547165	0.84805	0.363068	0.304116	0.834822	0.918064	0.369251	0.329168	0.55089	0.74408	0.0398683	0.129064	0.0664663	0.620575	0.261709	0.329999	0.320448	0.0163999	0.203016	0.492811	0.0190381
SETBP1	0.700543	0.376304	0.298343	0.120071	0.649352	0.146317	0.146207	0.0920827	0.183448	0.198059	0.813773	0.8718	0.264866	0.201264	0.170913	0.974528	0.358866	0.44775	0.0283827	0.476161	0.953309	0.200378	0.565066	0.0494834	0.386382	0.493102	0.502808	0.118969	0.521356	0.137022	0.0191429	0.61608	0.131259	0.42063	0.387203	0.095606	0.0596706	0.895771	0.539012	0.597609	0.716323	0.625585	0.649973	0.625804	0.191663	0.209136	0.279897	0.107771	0.681641
KERA	0.645137	0.478209	0.99917	0.120784	0.879631	0.911013	0.721762	0.0383952	0.822536	0.574895	0.660268	0.24196	0.526199	0.237966	0.462243	0.0117714	0.58271	0.977012	0.816899	0.720357	0.476256	0.903144	0.754326	0.979898	0.97536	0.754653	0.742403	0.0761764	0.891735	0.0401273	0.320661	0.787775	0.267395	0.604135	0.235799	0.534751	0.0603215	0.318772	0.381365	0.77834	0.550889	0.591166	0.00509186	0.996728	0.0922889	0.988514	0.850339	0.779683	0.450955
F2	0.87432	0.67459	0.255114	0.795078	0.543696	0.0139709	0.736777	0.201305	0.00642938	0.516291	0.215892	0.296046	0.0121397	0.153754	0.97795	0.956425	0.700257	0.777943	0.941885	0.0548222	0.996243	0.350627	0.949982	0.96868	0.397902	0.585081	0.00643308	0.296201	0.830191	0.395603	0.822681	0.0655721	0.782048	0.120434	0.530424	0.0347285	0.289541	0.725862	0.0832677	0.563039	0.352184	0.0953469	0.807266	0.314305	0.608205	0.574658	0.0124466	0.129527	0.0220491
CRP	0.679655	0.733237	0.253094	0.561048	0.552315	0.0367525	0.944436	0.349973	0.0218405	0.518547	0.308869	0.388106	0.0155481	0.282977	0.903686	0.997717	0.747768	0.922134	0.941452	0.112816	0.89371	0.32513	0.940456	0.972538	0.374835	0.525401	0.00656238	0.334877	0.822037	0.343164	0.77697	0.0847112	0.694164	0.10199	0.509922	0.0325595	0.400829	0.625944	0.0573764	0.61909	0.37623	0.122064	0.869221	0.248736	0.691628	0.436652	0.00798794	0.101226	0.0178124
APCS	0.411412	0.466408	0.0767394	0.867556	0.644866	0.202802	0.122366	0.956662	0.328649	0.300114	0.14552	0.172063	0.391764	0.302289	0.142986	0.773048	0.903101	0.378268	0.153885	0.780231	0.0157408	0.638684	0.519288	0.1652	0.447469	0.592025	0.519401	0.274124	0.854511	0.802323	0.320559	0.542386	0.594723	0.420447	0.539079	0.119042	0.40354	0.0581313	0.222354	0.625453	0.453552	0.783508	0.697442	0.0104278	0.309459	0.572154	0.108251	0.226183	0.950806
ADAMTSL3	0.728796	0.316002	0.37071	0.0790688	0.352573	0.264103	0.586629	0.0171791	0.185047	0.354766	0.933548	0.537788	0.12307	0.126349	0.317865	0.508494	0.245766	0.562527	0.399364	0.317173	0.696725	0.143695	0.535239	0.387534	0.230734	0.339723	0.243201	0.0663277	0.268918	0.142253	0.153016	0.828918	0.0930133	0.356233	0.126089	0.212287	0.155368	0.863215	0.400178	0.746649	0.991285	0.332649	0.278303	0.860408	0.263726	0.420007	0.404783	0.173166	0.442391
CYP2E1	0.486065	0.422615	0.0217393	0.733911	0.726482	0.0987658	0.140155	0.720327	0.145077	0.162456	0.0329643	0.0529279	0.144067	0.0671956	0.103895	0.603515	0.686917	0.494098	0.232166	0.749718	0.0523592	0.396807	0.567014	0.164174	0.133928	0.398411	0.155347	0.122683	0.447444	0.439115	0.366658	0.485376	0.442496	0.325919	0.566908	0.0475892	0.264825	0.0516412	0.0803925	0.891825	0.779304	0.903613	0.477849	0.00253708	0.0466272	0.552476	0.0374071	0.0538089	0.694272
KNG1	0.538256	0.414331	0.0223154	0.622728	0.738687	0.0958538	0.148962	0.651823	0.127523	0.126351	0.0353773	0.0585048	0.131922	0.0435905	0.118094	0.637062	0.500975	0.538995	0.266973	0.586856	0.106884	0.328484	0.568508	0.163517	0.0888328	0.344458	0.130228	0.123509	0.320966	0.343835	0.371234	0.546438	0.429004	0.319243	0.652504	0.0631607	0.274794	0.0772486	0.105365	0.808438	0.819166	0.985557	0.487572	0.00967538	0.0321812	0.463363	0.0541463	0.0465815	0.701794
METTL7B	0.716152	0.421423	0.0740648	0.309977	0.730849	0.165114	0.182825	0.548637	0.172154	0.0779276	0.149318	0.20388	0.244389	0.0475093	0.241274	0.926232	0.141926	0.644682	0.363852	0.300198	0.465027	0.226837	0.545035	0.170872	0.0643322	0.267486	0.233229	0.251659	0.124821	0.213138	0.363302	0.885392	0.492013	0.37044	0.978657	0.265728	0.443145	0.279966	0.438534	0.835378	0.720753	0.765546	0.70985	0.189661	0.0779504	0.182674	0.287313	0.116192	0.98804
HRG	0.951213	0.681743	0.938716	0.160799	0.587891	0.922736	0.360822	0.985565	0.83472	0.416416	0.364456	0.350926	0.35836	0.848405	0.968064	0.193414	0.23324	0.627588	0.4465	0.813034	0.744287	0.682656	0.48914	0.344234	0.950941	0.693182	0.186311	0.524067	0.547165	0.84805	0.363068	0.304116	0.834822	0.918064	0.369251	0.329168	0.55089	0.74408	0.0398683	0.129064	0.0664663	0.620575	0.261709	0.329999	0.320448	0.0163999	0.203016	0.492811	0.0190381
ITIH1	0.936516	0.494033	0.348219	0.767424	0.682276	0.0124114	0.65326	0.225225	0.00747644	0.573888	0.250486	0.390458	0.0322654	0.177893	0.842353	0.881854	0.742362	0.608452	0.956959	0.0353703	0.966646	0.455731	0.786241	0.999686	0.537556	0.734863	0.0192524	0.426418	0.973804	0.313219	0.74861	0.0987481	0.994319	0.17439	0.408077	0.0581762	0.290593	0.676467	0.161105	0.482576	0.309002	0.100479	0.980138	0.431636	0.675168	0.599498	0.0264916	0.199105	0.030539
FETUB	0.951213	0.681743	0.938716	0.160799	0.587891	0.922736	0.360822	0.985565	0.83472	0.416416	0.364456	0.350926	0.35836	0.848405	0.968064	0.193414	0.23324	0.627588	0.4465	0.813034	0.744287	0.682656	0.48914	0.344234	0.950941	0.693182	0.186311	0.524067	0.547165	0.84805	0.363068	0.304116	0.834822	0.918064	0.369251	0.329168	0.55089	0.74408	0.0398683	0.129064	0.0664663	0.620575	0.261709	0.329999	0.320448	0.0163999	0.203016	0.492811	0.0190381
AHSG	0.417524	0.46801	0.0622739	0.895775	0.670692	0.179278	0.133856	0.924764	0.289145	0.29324	0.106898	0.131266	0.322936	0.25056	0.13161	0.704153	0.915729	0.401262	0.171732	0.831408	0.0154617	0.614203	0.542941	0.176826	0.388775	0.573529	0.418341	0.230588	0.816334	0.755042	0.344228	0.498682	0.562501	0.404983	0.510238	0.0897435	0.361755	0.0504185	0.160279	0.731817	0.53919	0.779233	0.626659	0.00517681	0.232596	0.629207	0.0766418	0.176848	0.931766
HUNK	0.631515	0.286547	0.0697174	0.0498776	0.234481	0.0205662	0.139986	0.00612899	0.0144441	0.127436	0.337012	0.166534	0.0231713	0.00626988	0.162229	0.539837	0.222426	0.484058	0.168111	0.192312	0.614361	0.0866794	0.449286	0.151458	0.11302	0.24304	0.0952235	0.0120714	0.241405	0.210312	0.0771979	0.473864	0.116181	0.151012	0.347769	0.0318267	0.0492916	0.593525	0.194658	0.681155	0.795675	0.259231	0.278501	0.31461	0.122193	0.231966	0.0980639	0.0497878	0.449821
HPX	0.945172	0.546806	0.363074	0.811018	0.552071	0.0248807	0.818183	0.177998	0.0105407	0.680487	0.172787	0.263238	0.0219669	0.155054	0.799168	0.890867	0.773747	0.59807	0.803913	0.043153	0.983168	0.468475	0.809531	0.783553	0.505438	0.698781	0.0111153	0.371971	0.913747	0.307805	0.630583	0.0334543	0.967656	0.173845	0.519186	0.08512	0.345275	0.705954	0.127637	0.483067	0.282268	0.0818758	0.777912	0.451626	0.718053	0.508194	0.0384917	0.250231	0.0238856
CCL8	0.907085	0.359341	0.513916	0.184234	0.813963	0.54417	0.136664	0.205565	0.672015	0.879256	0.573283	0.270956	0.573548	0.188668	0.100209	0.115578	0.574174	0.677717	0.108117	0.520303	0.0859714	0.995768	0.91904	0.222001	0.826992	0.812462	0.842447	0.0546451	0.83405	0.00865596	0.0486431	0.713695	0.218103	0.705609	0.672856	0.174419	0.00789397	0.0438465	0.284345	0.904048	0.929326	0.240198	0.0665949	0.338093	0.00375575	0.595197	0.415618	0.342316	0.703386
STAB1	0.00400378	0.0227105	0.00702629	0.458093	0.0171656	0.259674	0.885156	0.496579	0.184119	0.00904493	0.756233	0.463701	0.0415883	0.351272	0.0331126	0.986333	0.0319352	0.0103317	0.248187	0.578376	0.816308	2.8027e-05	0.00306488	0.117368	0.000821745	0.000204389	0.096482	0.083634	0.0051088	0.523956	0.158256	0.495991	0.00988256	0.00170921	0.155179	0.115615	0.955036	0.845063	0.159445	0.0977463	0.159931	0.135611	0.689603	0.0896307	0.756361	0.320809	0.11675	0.0110468	0.901612
CDH4	0.929326	0.414004	0.505534	0.0818528	0.418597	0.286319	0.598788	0.00367081	0.204372	0.614079	0.85015	0.432512	0.128965	0.115604	0.396765	0.300124	0.505955	0.733305	0.494045	0.407444	0.863609	0.288859	0.753174	0.56324	0.403315	0.555026	0.265201	0.0484794	0.498034	0.156248	0.192454	0.687321	0.123841	0.513624	0.151106	0.203947	0.0780758	0.987226	0.337544	0.880565	0.790081	0.431712	0.148092	0.924262	0.226561	0.614113	0.409739	0.259188	0.309381
CDH26	0.00929946	0.00110318	0.0988039	0.220914	0.0727956	0.879391	0.71091	0.85578	0.862625	0.041297	0.642949	0.91648	0.561763	0.804243	0.0114732	0.962096	0.0985687	0.000232825	0.089412	0.625421	0.983552	0.028467	0.00122624	0.0362084	0.0625045	0.0187171	0.878356	0.242728	0.0304699	0.170878	0.0217683	0.676189	0.0137117	0.145521	0.039269	0.545794	0.841801	0.854332	0.712615	0.00580305	0.00740513	0.66733	0.786893	0.295215	0.900694	0.0778129	0.707474	0.187081	0.26612
ITIH2	0.828429	0.684819	0.267091	0.83186	0.408216	0.0187106	0.7859	0.209768	0.00791392	0.510775	0.223535	0.311028	0.0177552	0.183739	0.9318	0.969927	0.639359	0.812397	0.960182	0.0493532	0.95351	0.331407	0.961001	0.956195	0.411131	0.529558	0.012259	0.36002	0.782559	0.279666	0.758089	0.0386409	0.850231	0.0934245	0.603166	0.0695229	0.418414	0.645529	0.13356	0.716919	0.463305	0.0497195	0.890029	0.377659	0.842532	0.631548	0.0289026	0.195797	0.0507192
F13B	0.883922	0.776957	0.348322	0.978198	0.712947	0.0189135	0.539077	0.143575	0.0175127	0.445763	0.686088	0.684632	0.0406325	0.235632	0.780427	0.854698	0.664264	0.924629	0.449736	0.0915308	0.783443	0.309561	0.967532	0.563778	0.515658	0.668423	0.0523599	0.272805	0.931822	0.72581	0.677772	0.408986	0.549436	0.185029	0.739216	0.0200665	0.129376	0.566999	0.169117	0.725974	0.440659	0.166728	0.921377	0.482094	0.502207	0.816072	0.0242883	0.0909772	0.0392363
PRR16	0.771739	0.655103	0.138767	0.234699	0.699201	0.0128646	0.0250161	0.180182	0.03593	0.070921	0.749487	0.733285	0.196832	0.103069	0.268558	0.58252	0.265106	0.610475	0.0182688	0.188505	0.688327	0.186617	0.638295	0.0222096	0.328631	0.467015	0.352472	0.221562	0.536181	0.460653	0.0653805	0.837575	0.397805	0.245644	0.953555	0.0460219	0.0802019	0.765482	0.559005	0.726987	0.677933	0.427758	0.898287	0.381468	0.233106	0.139789	0.122045	0.0735176	0.721194
CFHR5	0.554486	0.925755	0.0968223	0.764959	0.121071	0.0168434	0.537643	0.265902	0.00702787	0.217663	0.104042	0.179137	0.0318882	0.115157	0.866615	0.840019	0.29788	0.820441	0.939629	0.0573687	0.759067	0.174342	0.507883	0.786923	0.205293	0.231111	0.0396869	0.366407	0.374516	0.311435	0.95587	0.0191818	0.835358	0.0276291	0.863898	0.165318	0.73749	0.923569	0.282853	0.739937	0.861074	0.0177496	0.999649	0.277291	0.925179	0.752376	0.0863098	0.256762	0.426209
PRKCQ	0.997118	0.776051	0.381316	0.51898	0.353755	0.176368	0.996658	0.0161136	0.0808661	0.959736	0.111392	0.0364	0.0130081	0.0496983	0.717131	0.0831665	0.925749	0.869945	0.699216	0.300896	0.736412	0.48278	0.968737	0.666295	0.366071	0.635327	0.0172949	0.0422032	0.679142	0.747264	0.9669	0.0244855	0.368303	0.376622	0.635268	0.120998	0.155756	0.766721	0.0354053	0.578853	0.301179	0.309189	0.0478972	0.4623	0.25871	0.554164	0.122552	0.270982	0.0313385
GPR34	0.168562	0.102446	0.0491788	0.306787	0.0215913	0.20501	0.979578	0.0599735	0.0974606	0.297427	0.195336	0.0357637	0.00275953	0.0759806	0.139572	0.145957	0.366937	0.212891	0.778825	0.556544	0.704906	0.0563405	0.162201	0.675865	0.0362038	0.0700392	0.0183704	0.00421073	0.119168	0.495437	0.396883	0.0418693	0.0332678	0.0503604	0.166663	0.0778756	0.417644	0.71788	0.0194932	0.461306	0.762963	0.183813	0.0643122	0.134431	0.413295	0.856566	0.0835218	0.0690436	0.299491
TBX5	0.284666	0.0486461	0.467187	0.15878	0.150471	0.947021	0.881648	0.148293	0.86867	0.851264	0.984339	0.361889	0.401987	0.554334	0.0868134	0.0741532	0.90275	0.126705	0.384258	0.337697	0.495014	0.447634	0.25931	0.528638	0.55729	0.469126	0.782393	0.0373588	0.639017	0.145457	0.0805658	0.632848	0.023138	0.618227	0.0330611	0.389188	0.337469	0.498532	0.280845	0.152142	0.438697	0.983773	0.038042	0.505169	0.548152	0.725583	0.634725	0.489015	0.904632
CSF1R	0.100279	0.0948937	0.00413254	0.329796	0.0234892	0.0816414	0.724889	0.139068	0.0324338	0.0571685	0.159218	0.0581765	0.000702409	0.0439515	0.0950757	0.462513	0.102232	0.153281	0.541231	0.29802	0.772783	0.00662941	0.0828204	0.350656	0.0014248	0.0123702	0.00578233	0.0127689	0.0241043	0.529637	0.333224	0.0937049	0.0435745	0.00655085	0.286192	0.0452972	0.520898	0.757552	0.0334461	0.43972	0.559147	0.104458	0.260476	0.0603954	0.376105	0.523639	0.0385599	0.0127032	0.434783
CA3	0.707327	0.347662	0.144356	0.0880288	0.546217	0.258762	0.0717345	0.610864	0.304134	0.0338761	0.479345	0.56604	0.628558	0.140701	0.314439	0.573867	0.0421504	0.487547	0.200676	0.330215	0.603002	0.204188	0.355629	0.0637251	0.143854	0.238098	0.757963	0.531098	0.095449	0.251762	0.177092	0.705917	0.63205	0.401788	0.645582	0.653626	0.727168	0.435034	0.814164	0.551707	0.20446	0.616399	0.808939	0.536232	0.397392	0.00421231	0.780025	0.367595	0.286579
FNDC5	0.027773	0.0600192	0.0421191	0.435119	0.20039	0.317271	0.317822	0.857929	0.3938	0.00683982	0.727811	0.958961	0.372235	0.648076	0.0212985	0.493449	0.112949	0.0107014	0.00697631	0.941206	0.890982	0.0235496	0.0210985	0.00155279	0.0852185	0.0457251	0.623988	0.281032	0.116093	0.420892	0.018405	0.644278	0.0597269	0.0672042	0.36725	0.173105	0.784959	0.927747	0.571952	0.0451149	0.042285	0.52168	0.768951	0.147646	0.753122	0.0908883	0.255879	0.0501019	0.547421
S1PR3	0.773193	0.661621	0.193827	0.391186	0.885319	0.0327588	0.103133	0.161215	0.0612485	0.169973	0.839161	0.720744	0.13818	0.136656	0.218674	0.888236	0.468744	0.648535	0.0304101	0.298946	0.783584	0.23725	0.776171	0.0541998	0.359742	0.575577	0.242425	0.132647	0.678789	0.332308	0.0818277	0.81795	0.250785	0.332479	0.959358	0.014285	0.0293634	0.807537	0.289673	0.993941	0.951612	0.615914	0.799703	0.329681	0.104051	0.413226	0.0620648	0.0333429	0.348952
BRME1	0.554444	0.438714	0.0128231	0.171531	0.124482	0.00509666	0.120968	0.117077	0.00265561	0.0514279	0.0311009	0.0440873	0.0261065	0.00260817	0.343006	0.87301	0.119359	0.573183	0.445505	0.0808342	0.351234	0.0888642	0.35759	0.270682	0.0517333	0.133508	0.0572787	0.104374	0.130039	0.787243	0.397783	0.123099	0.486919	0.0490275	0.798626	0.102702	0.368494	0.424325	0.27395	0.667946	0.553054	0.111035	0.625036	0.143594	0.373634	0.183363	0.096615	0.113608	0.773898
COL1A1	0.382722	0.0685545	0.251063	0.0377868	0.394818	0.484149	0.286099	0.190076	0.496886	0.145967	0.73002	0.807519	0.42587	0.297392	0.0510927	0.745616	0.207709	0.148284	0.0449703	0.893848	0.939195	0.124617	0.219454	0.0381319	0.206784	0.245178	0.741868	0.0990904	0.19446	0.0168801	0.00360202	0.487224	0.0332891	0.447426	0.0796553	0.298539	0.250382	0.721129	0.66982	0.268963	0.298557	0.813482	0.458115	0.611804	0.238489	0.0820104	0.600949	0.162135	0.770267
FSCN2	0.828028	0.606604	0.884718	0.173789	0.529268	0.947925	0.23882	0.982176	0.916809	0.353979	0.479052	0.460982	0.409707	0.909697	0.862285	0.21301	0.30243	0.510725	0.304955	0.933038	0.958054	0.673661	0.421707	0.23944	0.974061	0.667366	0.200231	0.622294	0.600336	0.882827	0.276633	0.370162	0.88223	0.833298	0.452656	0.465671	0.633926	0.968154	0.0787567	0.0829047	0.0348251	0.683728	0.284487	0.545399	0.364786	0.0124002	0.31893	0.583689	0.0152612
DMGDH	0.804545	0.698719	0.259119	0.757273	0.370706	0.0374219	0.990526	0.266979	0.0129367	0.529679	0.142958	0.233008	0.0145121	0.17836	0.859481	0.951389	0.56082	0.777463	0.690808	0.040054	0.88908	0.31745	0.931379	0.765272	0.318377	0.452525	0.00446373	0.393568	0.633157	0.256064	0.554491	0.0147186	0.895974	0.0860872	0.613619	0.116144	0.592042	0.638174	0.119238	0.624489	0.422581	0.0401605	0.8379	0.370198	0.873819	0.553309	0.0419227	0.219009	0.0509803
C6	0.810114	0.572184	0.381258	0.963048	0.579091	0.0304858	0.80986	0.111376	0.0108327	0.766311	0.0978734	0.153395	0.0172912	0.0855156	0.797743	0.657115	0.798806	0.509038	0.688674	0.0408054	0.924192	0.523848	0.718144	0.686143	0.482782	0.748442	0.00724531	0.291861	0.881077	0.456282	0.613351	0.0219179	0.954777	0.238915	0.584746	0.0986071	0.274466	0.863734	0.107206	0.364884	0.210442	0.112721	0.558109	0.478297	0.540414	0.507357	0.0518657	0.274963	0.0176585
BHMT	0.398843	0.344685	0.0259348	0.545478	0.561432	0.117807	0.0425868	0.824263	0.211743	0.112241	0.106405	0.140809	0.328607	0.143711	0.0908989	0.900579	0.668699	0.322575	0.0882125	0.943255	0.0217367	0.41447	0.397458	0.0610601	0.237898	0.395338	0.457071	0.219079	0.514252	0.554009	0.192927	0.653725	0.519269	0.31762	0.67653	0.111899	0.375013	0.044562	0.29009	0.581327	0.318406	0.926254	0.754448	0.0100789	0.204311	0.2454	0.116691	0.146001	0.76349
FMO1	0.561555	0.509318	0.478552	0.380938	0.487584	0.630062	0.111984	0.901824	0.844158	0.329192	0.972125	0.946805	0.708715	0.904377	0.479348	0.442336	0.706792	0.340501	0.135534	0.733836	0.275254	0.730651	0.376615	0.139056	0.958275	0.681114	0.40892	0.998219	0.850868	0.994694	0.206103	0.734235	0.961336	0.657725	0.8476	0.954193	0.963415	0.459197	0.493196	0.0814298	0.0390736	0.939434	0.514164	0.649177	0.652301	0.0751374	0.920845	0.954393	0.0860728
C3AR1	0.111769	0.0636866	0.0036665	0.198846	0.0211219	0.0721	0.556118	0.0832462	0.0321201	0.056316	0.176967	0.0508133	0.00132349	0.0286944	0.0577639	0.393341	0.123705	0.126458	0.390188	0.362924	0.636896	0.0083037	0.0799837	0.255922	0.00338068	0.0181891	0.0153341	0.0038684	0.0336119	0.382969	0.192814	0.128572	0.0260862	0.0121022	0.217225	0.0350129	0.378882	0.625654	0.039074	0.360018	0.48274	0.142441	0.19773	0.062408	0.302845	0.405651	0.0438914	0.0133182	0.500535
ALDOB	0.8436	0.524205	0.360012	0.939165	0.696464	0.00894856	0.55975	0.132483	0.00509136	0.612164	0.231595	0.331297	0.0272534	0.120252	0.888177	0.977505	0.782177	0.576652	0.899837	0.036146	0.953941	0.481393	0.728049	0.970727	0.562553	0.794125	0.0204697	0.333965	0.991531	0.440781	0.861113	0.105249	0.934767	0.214483	0.47862	0.0468419	0.183011	0.773198	0.150423	0.45671	0.278821	0.121873	0.825981	0.461584	0.54282	0.650246	0.0279196	0.198273	0.0247817
F9	0.986019	0.55025	0.313109	0.693415	0.723637	0.0146195	0.664184	0.255748	0.0104122	0.582271	0.245785	0.362195	0.0265123	0.188816	0.968529	0.971137	0.837845	0.67901	0.877025	0.0691603	0.945582	0.463152	0.805979	0.94467	0.519745	0.738786	0.0151725	0.36235	0.98944	0.369295	0.806257	0.108891	0.8947	0.180675	0.382184	0.0332467	0.246784	0.764876	0.100065	0.469367	0.294032	0.155911	0.8942	0.324423	0.569161	0.527169	0.0123221	0.148298	0.0194332
FTCD	0.990824	0.342957	0.47916	0.3042	0.925624	0.067881	0.991178	0.619155	0.0536885	0.705772	0.347351	0.597263	0.0852099	0.446427	0.679414	0.701283	0.881476	0.544147	0.815517	0.0773655	0.7763	0.59142	0.708525	0.794682	0.627629	0.818693	0.0300607	0.727719	0.913702	0.151197	0.424831	0.145391	0.817189	0.231638	0.203378	0.11617	0.566856	0.511674	0.175657	0.339962	0.221144	0.173724	0.7658	0.423759	0.854875	0.316737	0.0378217	0.248249	0.023583
SIRPB2	0.0118474	0.0128378	0.000974284	0.292332	0.0209814	0.240966	0.595547	0.550566	0.184767	0.00242284	0.43571	0.261652	0.0692595	0.201756	0.0210447	0.925606	0.0197119	0.0134773	0.233629	0.598124	0.794293	0.000638793	0.00319454	0.0778737	4.05962e-05	0.000180116	0.138274	0.0826343	0.000797644	0.378482	0.135025	0.493285	0.0295361	0.00667568	0.198215	0.169943	0.972104	0.71345	0.220087	0.110277	0.087578	0.224823	0.644195	0.051651	0.582806	0.142957	0.16881	0.0219985	0.774793
COL14A1	0.918707	0.335085	0.459347	0.050497	0.796725	0.34091	0.179171	0.094444	0.375693	0.328655	0.838396	0.807471	0.447193	0.196281	0.199281	0.724394	0.401077	0.554966	0.0780568	0.630651	0.902345	0.335561	0.688514	0.0992627	0.453873	0.624247	0.711619	0.13855	0.502769	0.029111	0.0243688	0.469809	0.157617	0.735823	0.270134	0.261043	0.0729193	0.700861	0.712548	0.735352	0.765463	0.911577	0.457569	0.840744	0.118156	0.171713	0.572544	0.237297	0.877107
RAB27B	0.286258	0.0589465	0.0971952	0.140468	0.30598	0.263421	0.39544	0.0749138	0.244418	0.259662	0.640791	0.220685	0.0728731	0.110459	0.0120443	0.193179	0.558728	0.154499	0.094541	0.994606	0.496804	0.135747	0.279815	0.119607	0.130281	0.252594	0.211988	0.000897935	0.30898	0.0302381	0.0184966	0.787462	0.00374902	0.30529	0.178998	0.0296219	0.0609619	0.395678	0.0639275	0.50641	0.690368	0.859187	0.0713851	0.149665	0.0515304	0.480873	0.113686	0.02805	0.475002
CD163	0.0370897	0.145344	0.00480964	0.702802	0.0386785	0.0974669	0.932059	0.384404	0.0469611	0.0268527	0.355884	0.23864	0.00259601	0.181227	0.123944	0.890711	0.0647864	0.111315	0.498363	0.270073	0.875834	0.00127422	0.0506404	0.302556	0.000920725	0.00412501	0.00575099	0.0730322	0.0213159	0.848072	0.442936	0.173035	0.0586543	0.00037801	0.440016	0.0449	0.798451	0.844975	0.0478865	0.39494	0.516892	0.0656079	0.627441	0.0537183	0.624985	0.641965	0.0238317	0.00444971	0.419952
C9	0.534163	0.410452	0.0215831	0.616927	0.733361	0.0946901	0.143705	0.653267	0.127193	0.123456	0.0356128	0.0588698	0.133656	0.0436462	0.115959	0.642925	0.499319	0.532438	0.259992	0.590275	0.103566	0.327068	0.562438	0.158334	0.0891147	0.342547	0.133587	0.123806	0.320683	0.344579	0.364221	0.548938	0.429056	0.31706	0.653863	0.0631968	0.275356	0.0754528	0.107741	0.82139	0.80505	0.985874	0.492331	0.00938992	0.0331329	0.453399	0.054517	0.0469358	0.713934
MBL2	0.946835	0.549767	0.311964	0.519777	0.691182	0.0517362	0.983009	0.402689	0.0259243	0.640446	0.121541	0.241977	0.023155	0.202313	0.845004	0.904773	0.747157	0.615314	0.676172	0.0614788	0.957089	0.46529	0.830282	0.73062	0.376322	0.626881	0.00318454	0.437445	0.796	0.311607	0.456128	0.0413859	0.986597	0.176535	0.358537	0.0910811	0.500084	0.757253	0.0760102	0.322909	0.225244	0.14632	0.822287	0.300474	0.612235	0.371068	0.0250165	0.182771	0.0171447
VTN	0.953674	0.608608	0.310301	0.809087	0.558985	0.0161539	0.736995	0.186023	0.0078231	0.579576	0.234941	0.32271	0.0184026	0.167209	0.930568	0.972858	0.743307	0.7085	0.987649	0.0511411	0.976631	0.400673	0.885967	0.968638	0.473436	0.652114	0.0114947	0.335168	0.903717	0.351552	0.783749	0.0638103	0.855862	0.143391	0.525693	0.0486731	0.292355	0.689667	0.111746	0.557002	0.333825	0.0891626	0.832256	0.386925	0.672144	0.563835	0.0210944	0.175453	0.0239614
SLC22A7	0.804015	0.4759	0.573095	0.0787065	0.501356	0.67574	0.135845	0.838478	0.779344	0.147524	0.764836	0.711719	0.66903	0.665803	0.663896	0.246567	0.0996965	0.486643	0.241117	0.613149	0.923346	0.42256	0.355597	0.127264	0.610654	0.443233	0.435732	0.871281	0.290255	0.567907	0.197851	0.391219	0.952278	0.657313	0.426582	0.665337	0.802152	0.868934	0.159388	0.159433	0.0444494	0.591298	0.373918	0.745369	0.734902	0.000336304	0.489939	0.924049	0.0291159
AQP8	0.951213	0.681743	0.938716	0.160799	0.587891	0.922736	0.360822	0.985565	0.83472	0.416416	0.364456	0.350926	0.35836	0.848405	0.968064	0.193414	0.23324	0.627588	0.4465	0.813034	0.744287	0.682656	0.48914	0.344234	0.950941	0.693182	0.186311	0.524067	0.547165	0.84805	0.363068	0.304116	0.834822	0.918064	0.369251	0.329168	0.55089	0.74408	0.0398683	0.129064	0.0664663	0.620575	0.261709	0.329999	0.320448	0.0163999	0.203016	0.492811	0.0190381
NTNG1	0.0670876	0.00314399	0.19927	0.194504	0.0523937	0.923741	0.879312	0.246453	0.770352	0.440384	0.916352	0.299361	0.220086	0.492251	0.0228941	0.11262	0.56481	0.0252804	0.421116	0.474765	0.73937	0.130413	0.0577715	0.410214	0.139203	0.113746	0.461117	0.0189186	0.169116	0.100134	0.0862527	0.574778	0.000604427	0.284974	0.00906152	0.329944	0.600784	0.62704	0.163821	0.107831	0.293903	0.773247	0.0513057	0.287674	0.513896	0.614072	0.486727	0.213806	0.937735
LRRC55	0.860954	0.314312	0.238912	0.131275	0.932622	0.189626	0.0547138	0.121458	0.274723	0.392681	0.597591	0.328666	0.293874	0.08869	0.0605658	0.365299	0.909053	0.517547	0.0231992	0.980389	0.197005	0.520491	0.807378	0.058659	0.483468	0.797059	0.532422	0.0308715	0.815856	0.0236778	0.0131624	0.746813	0.139816	0.782254	0.649245	0.0482595	0.0040193	0.147808	0.245795	0.911047	0.891654	0.65357	0.201955	0.244795	0.00672436	0.337617	0.189367	0.110565	0.63347
LAIR1	0.356824	0.395599	0.0497493	0.611516	0.147854	0.0557706	0.86241	0.0756731	0.0177574	0.291969	0.110226	0.0432218	7.7526e-06	0.0387478	0.282339	0.292916	0.409713	0.52761	0.811796	0.228968	0.778887	0.0872989	0.425604	0.72083	0.0485006	0.152894	0.000132679	0.0149916	0.228075	0.744248	0.643649	0.0368705	0.131491	0.0493054	0.617082	0.0164808	0.261134	0.822951	0.00461802	0.989681	0.735492	0.153635	0.165294	0.0997473	0.254277	0.881542	0.0102634	0.0233754	0.0702215
CRABP2	0.882508	0.540668	0.439007	0.0301821	0.741772	0.157931	0.0697077	0.0559013	0.192938	0.264663	0.999585	0.787059	0.422234	0.116588	0.368718	0.999588	0.308231	0.757937	0.0870963	0.32031	0.863974	0.340359	0.795439	0.101885	0.515686	0.666972	0.689407	0.214081	0.545017	0.127078	0.0457728	0.614093	0.351903	0.634209	0.406213	0.275813	0.0720415	0.761213	0.909922	0.745236	0.740899	0.619062	0.695612	0.955005	0.208785	0.0927419	0.569424	0.312647	0.942929
KRT18	0.106812	0.105202	0.38457	0.540596	0.0131285	0.952895	0.490521	0.348769	0.739925	0.764874	0.821404	0.347218	0.250478	0.779669	0.317	0.22795	0.780959	0.123435	0.951354	0.649593	0.930291	0.255759	0.114179	0.945494	0.351616	0.186209	0.445157	0.164148	0.366564	0.899343	0.5665	0.130741	0.0944957	0.207264	0.0630723	0.581918	0.904969	0.931318	0.263589	0.0962735	0.395513	0.345683	0.185045	0.493067	0.659544	0.927548	0.59282	0.580801	0.821756
PAK3	0.489953	0.140493	0.207112	0.0647829	0.529608	0.271727	0.175296	0.135445	0.307624	0.14745	0.890881	0.706032	0.296024	0.191381	0.0534265	0.740468	0.292713	0.237557	0.0226385	0.742695	0.796717	0.149669	0.351045	0.0270967	0.231798	0.333923	0.559808	0.0651717	0.308478	0.0266702	0.00388399	0.556517	0.0467371	0.432496	0.211192	0.131893	0.0996801	0.635575	0.483613	0.448608	0.487909	0.826925	0.443993	0.472867	0.120842	0.131801	0.352219	0.0881971	0.929552
CAPN6	0.0203315	0.045356	0.0513571	0.480704	0.22532	0.44324	0.504339	0.965404	0.487396	0.00474421	0.648004	0.879434	0.385663	0.712386	0.0232715	0.486275	0.0532733	0.00943913	0.0252001	0.899108	0.843072	0.0118739	0.0143774	0.00488547	0.0424758	0.0234138	0.575055	0.318602	0.0481641	0.329704	0.035749	0.546379	0.0427845	0.0700993	0.295023	0.241739	0.952336	0.921865	0.589139	0.0741436	0.057654	0.522061	0.762977	0.187697	0.725013	0.105289	0.322336	0.0410526	0.554653
P2RY11	0.00310796	0.00644444	0.00185139	0.319445	0.0119307	0.264345	0.536326	0.550644	0.23622	0.00945454	0.572015	0.307867	0.092915	0.307298	0.00753273	0.862165	0.0954281	0.00199348	0.123228	0.907713	0.60754	0.00372653	0.00122843	0.0517856	0.00613886	0.00219491	0.230342	0.064125	0.0199332	0.442265	0.0669568	0.495814	0.0155111	0.00864307	0.180722	0.125411	0.872717	0.644375	0.194006	0.0311331	0.0450455	0.299216	0.599299	0.0333639	0.699054	0.176882	0.143267	0.0304279	0.740725
CNR1	0.0147924	0.0980097	0.0341893	0.749876	0.061078	0.208868	0.889374	0.436597	0.172754	0.0802877	0.916072	0.569298	0.0361835	0.493502	0.0547611	0.899592	0.275214	0.0334311	0.182047	0.753512	0.928424	0.0126211	0.040862	0.164994	0.053122	0.0331086	0.102226	0.0747387	0.162151	0.772369	0.172729	0.44574	0.0160173	0.00969737	0.326042	0.0332475	0.629664	0.786416	0.0736401	0.148928	0.361355	0.20843	0.641587	0.0789128	0.771474	0.708013	0.0385191	0.0121308	0.502206
ADAM19	0.0832565	0.0916103	0.0397227	0.305954	0.0799113	0.169247	0.765318	0.213834	0.106487	0.0259374	0.883294	0.566977	0.0301341	0.222138	0.0900953	0.972426	0.0298899	0.0944074	0.243068	0.302238	0.582594	0.000811679	0.0588774	0.139888	0.00814009	0.0128389	0.0747047	0.0687827	0.0211674	0.372907	0.141003	0.65296	0.017193	0.0154875	0.153602	0.0878576	0.573517	0.668719	0.200773	0.293145	0.429904	0.11283	0.635549	0.266929	0.52336	0.329606	0.126672	0.0110241	0.603819
MMP27	0.432381	0.541372	0.149538	0.990597	0.671721	0.297403	0.182376	0.956186	0.451328	0.44024	0.233544	0.256234	0.513186	0.470442	0.205	0.793003	0.716442	0.403829	0.193538	0.632524	0.022239	0.78098	0.571081	0.239593	0.636094	0.717707	0.66713	0.36947	0.951119	0.965441	0.384851	0.555128	0.674435	0.504602	0.527746	0.176857	0.478616	0.0908208	0.283402	0.565334	0.45939	0.737383	0.752011	0.0276629	0.471201	0.702573	0.161363	0.347034	0.925717
RAB42	0.00344782	0.0351936	0.0238435	0.522534	0.0518567	0.436135	0.724552	0.987637	0.410011	0.00134615	0.899608	0.918797	0.290264	0.688541	0.0574772	0.457332	0.0125063	0.00476836	0.146334	0.727289	0.766793	0.00145144	0.000677513	0.0412641	0.0104992	0.000880127	0.429107	0.377735	0.00631996	0.646653	0.139424	0.991597	0.070841	0.0112516	0.237599	0.359044	0.634997	0.789291	0.598226	0.0288683	0.0222391	0.224101	0.704617	0.173515	0.883203	0.111465	0.357485	0.0702116	0.465781
DNAJB13	0.895391	0.877118	0.495902	0.814339	0.522764	0.111932	0.0743534	0.530596	0.242378	0.425795	0.926788	0.890743	0.51806	0.43548	0.421324	0.628296	0.984356	0.961089	0.0235991	0.596165	0.597926	0.734859	0.779161	0.0802998	0.925547	0.846001	0.648446	0.463675	0.667893	0.565073	0.173344	0.457019	0.658788	0.776454	0.473227	0.0610247	0.0430111	0.701351	0.537513	0.767075	0.798414	0.856599	0.825796	0.435111	0.162939	0.625379	0.143432	0.16781	0.461698
HSD17B13	0.542156	0.856544	0.241843	0.49614	0.524637	0.0663117	0.896295	0.404487	0.040358	0.51717	0.378666	0.416729	0.0134084	0.352196	0.792206	0.931253	0.750336	0.940915	0.937535	0.174136	0.815689	0.281379	0.835291	0.966823	0.321419	0.4559	0.0049622	0.298437	0.756554	0.40373	0.806657	0.100266	0.549332	0.0919901	0.597305	0.0287533	0.445574	0.583399	0.0344504	0.667417	0.391822	0.14735	0.799628	0.212003	0.678436	0.370532	0.00628231	0.0736992	0.0134834
FAM180A	0.832311	0.23766	0.275113	0.0192015	0.490057	0.195937	0.161168	0.0147911	0.192574	0.323946	0.720746	0.35948	0.194643	0.0544869	0.140269	0.384965	0.433659	0.504127	0.120773	0.565485	0.623487	0.260555	0.603769	0.146652	0.316192	0.501109	0.420773	0.0265887	0.425444	0.0313307	0.02464	0.973877	0.0945625	0.541983	0.202193	0.136124	0.0312702	0.49064	0.397969	0.690986	0.796453	0.729644	0.18648	0.597177	0.0742252	0.211396	0.362991	0.16717	0.67647
PARPBP	0.392966	0.747805	0.0433232	0.954082	0.293588	0.00501301	0.574268	0.213255	0.0018337	0.152271	0.210916	0.22152	0.000783427	0.0897232	0.417877	0.956657	0.35255	0.638827	0.50882	0.0902643	0.892544	0.0852661	0.516003	0.456828	0.0960446	0.201857	0.000977091	0.112484	0.372098	0.767948	0.682675	0.114732	0.333245	0.021178	0.83784	0.0039786	0.286222	0.910682	0.0306276	0.963168	0.776753	0.0896502	0.721892	0.0895737	0.419415	0.975527	0.000651569	0.011933	0.0795781
IGF1	0.00787745	0.0028501	0.0309951	0.224087	0.0201886	0.501985	0.869116	0.457232	0.396892	0.0220674	0.994725	0.559851	0.139093	0.424445	0.0175597	0.829853	0.0354692	0.00348542	0.207961	0.852935	0.821119	0.00102158	0.00155612	0.0955399	0.00496611	0.00132558	0.28657	0.0823713	0.00379494	0.230446	0.065807	0.785996	0.00249652	0.0274431	0.0336447	0.261454	0.961931	0.952165	0.315773	0.0459805	0.0831065	0.274963	0.546406	0.204347	0.722817	0.181914	0.337079	0.0483051	0.77176
TOX3	0.842317	0.660353	0.621262	0.392273	0.978729	0.337805	0.0889759	0.421755	0.535255	0.518927	0.548554	0.760088	0.808876	0.676226	0.284848	0.807847	0.913031	0.530516	0.00794228	0.875015	0.52571	0.726024	0.828666	0.0604099	0.891597	0.938373	0.816038	0.418103	0.690418	0.423983	0.0338621	0.393156	0.4245	0.839471	0.842312	0.21374	0.102169	0.678402	0.857742	0.46065	0.582457	0.827488	0.991818	0.666395	0.465635	0.353793	0.45851	0.419453	0.985913
NEIL3	0.523797	0.29021	0.210551	0.2105	0.0404867	0.268777	0.969632	0.0172823	0.122263	0.611195	0.152532	0.0302253	0.0194509	0.0621469	0.468156	0.105542	0.487677	0.57274	0.783299	0.408924	0.764272	0.198194	0.415335	0.87304	0.158068	0.22466	0.0521035	0.0287237	0.243896	0.647964	0.681231	0.0153466	0.181096	0.167045	0.172411	0.257875	0.439178	0.785527	0.104415	0.670289	0.982562	0.146254	0.0532565	0.4551	0.567502	0.929751	0.272463	0.319443	0.309894
F13A1	0.220002	0.131534	0.0579588	0.213119	0.0272351	0.14712	0.899925	0.0318544	0.0583834	0.201755	0.305585	0.0943068	0.00235111	0.05852	0.183754	0.288546	0.181559	0.257846	0.705022	0.311496	0.997044	0.0249586	0.169919	0.573406	0.0249185	0.0531185	0.0165744	0.00917454	0.0712955	0.452395	0.344836	0.0985876	0.036553	0.0367635	0.129936	0.0859869	0.393884	0.970784	0.0577574	0.486856	0.774757	0.0945312	0.137524	0.252682	0.42777	0.662886	0.106887	0.0558043	0.30996
PAH	0.761159	0.426913	0.10825	0.240752	0.715385	0.205339	0.188287	0.544205	0.208572	0.0732486	0.229071	0.29535	0.322062	0.0647497	0.295035	0.954882	0.09351	0.65847	0.378834	0.266178	0.596726	0.218172	0.528789	0.170522	0.0758099	0.262318	0.318823	0.325786	0.103181	0.205938	0.351415	0.993177	0.531365	0.397876	0.864377	0.379939	0.523894	0.370607	0.622839	0.911245	0.641898	0.704504	0.816681	0.313187	0.126331	0.120239	0.42385	0.17041	0.838954
A1BG	0.962429	0.583514	0.287435	0.873224	0.521888	0.00935727	0.64613	0.202773	0.00420614	0.471448	0.239532	0.369279	0.0247761	0.15784	0.873916	0.835233	0.590211	0.704276	0.957299	0.0237051	0.929609	0.352718	0.933339	0.959366	0.443724	0.594577	0.016615	0.410832	0.816998	0.299949	0.787676	0.0757125	0.946956	0.114949	0.513573	0.068223	0.357314	0.637504	0.184539	0.620586	0.424758	0.0532055	0.989975	0.432886	0.772768	0.725342	0.0319081	0.194876	0.0556187
THEMIS2	0.0298972	0.00108828	0.0171806	0.14103	0.0459044	0.425296	0.653801	0.301592	0.342219	0.0458086	0.632162	0.245289	0.0917247	0.203429	0.00290249	0.42607	0.111827	0.0104988	0.175683	0.980168	0.726447	0.00985803	0.0138325	0.0893504	0.00519529	0.0109289	0.222126	0.0141189	0.0136005	0.0753537	0.0364734	0.684201	0.00062628	0.072592	0.0510448	0.15143	0.585387	0.560858	0.152482	0.129583	0.164191	0.511578	0.222653	0.0987993	0.304841	0.210016	0.235075	0.0292275	0.92855
PTN	0.501829	0.156364	0.408578	0.0630426	0.480901	0.600232	0.433408	0.277579	0.58157	0.158657	0.540409	0.890202	0.573191	0.429733	0.180332	0.94245	0.108016	0.258449	0.129084	0.663157	0.642406	0.131679	0.277213	0.0893148	0.241322	0.258584	0.831843	0.278455	0.158091	0.0537043	0.0357129	0.37434	0.103139	0.490224	0.0907655	0.538016	0.46448	0.903215	0.989878	0.349456	0.352464	0.651085	0.752123	0.959106	0.428173	0.0799142	0.855789	0.273726	0.68999
FABP1	0.927469	0.559161	0.272821	0.690035	0.682654	0.0115129	0.69077	0.300932	0.00674961	0.448931	0.26243	0.418613	0.0240404	0.188865	0.941319	0.795716	0.61725	0.706825	0.898642	0.0311263	0.893739	0.356312	0.895006	0.89824	0.40831	0.607603	0.01017	0.423519	0.829545	0.341278	0.768977	0.126704	0.912529	0.127547	0.393101	0.04397	0.340602	0.641523	0.133038	0.486532	0.342855	0.0974454	0.947845	0.344646	0.633212	0.623166	0.015123	0.126884	0.0314356
PLPPR4	0.440439	0.543101	0.210258	0.903513	0.627595	0.369578	0.165965	0.909729	0.551604	0.450121	0.370795	0.393443	0.688242	0.601116	0.250548	0.950751	0.745479	0.37552	0.171086	0.580665	0.0350448	0.815787	0.529454	0.220938	0.75986	0.745941	0.90262	0.493708	0.91409	0.965283	0.344372	0.673192	0.746154	0.545406	0.617082	0.28807	0.588171	0.131858	0.484998	0.396753	0.317327	0.770216	0.911607	0.0747571	0.682556	0.565288	0.286458	0.495116	0.690692
MS4A2	0.472287	0.671301	0.24489	0.730681	0.811016	0.406643	0.33867	0.846257	0.569275	0.655591	0.286037	0.305691	0.55048	0.637502	0.276556	0.707345	0.487411	0.493132	0.298253	0.515198	0.0374986	0.947338	0.709783	0.395778	0.789906	0.874976	0.661103	0.429335	0.745235	0.90318	0.550403	0.525733	0.725262	0.612262	0.427437	0.187455	0.504967	0.13125	0.223998	0.715305	0.664697	0.63203	0.710686	0.0348129	0.510607	0.951565	0.154703	0.395826	0.863999
TPBGL	0.209359	0.419774	0.221291	0.748234	0.634773	0.32423	0.797697	0.611622	0.372339	0.526214	0.907709	0.609282	0.140551	0.675044	0.111656	0.580139	0.782507	0.260787	0.167524	0.755808	0.613967	0.37299	0.488344	0.300463	0.457576	0.529321	0.221965	0.113667	0.964228	0.720617	0.278326	0.685694	0.099505	0.2939	0.971025	0.0128304	0.220852	0.784748	0.02702	0.692249	0.97377	0.954271	0.453285	0.0658575	0.344002	0.631906	0.0205443	0.0432325	0.183782
COL6A6	0.681507	0.605495	0.795202	0.0966029	0.788919	0.475322	0.193113	0.112292	0.543574	0.682163	0.796109	0.885207	0.660712	0.265956	0.365382	0.602447	0.781866	0.915124	0.138643	0.769205	0.81742	0.719805	0.867154	0.21993	0.832256	0.915076	0.908887	0.223403	0.921883	0.0306699	0.0676284	0.367737	0.321195	0.829737	0.45532	0.354727	0.0343807	0.614193	0.804104	0.899653	0.873174	0.752111	0.405529	0.944635	0.0783437	0.342618	0.718243	0.427618	0.744827
AKR1D1	0.951213	0.681743	0.938716	0.160799	0.587891	0.922736	0.360822	0.985565	0.83472	0.416416	0.364456	0.350926	0.35836	0.848405	0.968064	0.193414	0.23324	0.627588	0.4465	0.813034	0.744287	0.682656	0.48914	0.344234	0.950941	0.693182	0.186311	0.524067	0.547165	0.84805	0.363068	0.304116	0.834822	0.918064	0.369251	0.329168	0.55089	0.74408	0.0398683	0.129064	0.0664663	0.620575	0.261709	0.329999	0.320448	0.0163999	0.203016	0.492811	0.0190381
MYMX	0.500437	0.711968	0.309751	0.711998	0.790968	0.462666	0.395158	0.858901	0.624266	0.759939	0.327003	0.335274	0.597431	0.71132	0.333779	0.684522	0.420685	0.52346	0.3549	0.47587	0.045576	0.984072	0.742813	0.480461	0.891806	0.936911	0.721272	0.469347	0.666796	0.822592	0.602078	0.492448	0.766359	0.653993	0.45435	0.230182	0.540439	0.160406	0.254703	0.684557	0.680516	0.646733	0.703964	0.0575879	0.612979	0.883078	0.193581	0.485371	0.863735
SERPINF2	0.982699	0.501709	0.37944	0.670119	0.722045	0.0218798	0.775083	0.252501	0.0135432	0.617774	0.315267	0.444552	0.0311846	0.228631	0.862021	0.911053	0.787321	0.632014	0.974787	0.0499921	0.870875	0.454569	0.786189	0.9655	0.542514	0.739811	0.0163792	0.422542	0.995474	0.324597	0.728662	0.11622	0.92601	0.182216	0.419998	0.0522031	0.296955	0.601518	0.131184	0.455805	0.263754	0.117217	0.955096	0.431037	0.66689	0.493071	0.0224785	0.176907	0.0162546
IRX6	0.496595	0.381608	0.0167418	0.582415	0.689226	0.0872188	0.104887	0.674003	0.128138	0.105807	0.0384552	0.0627176	0.151899	0.0476688	0.0992638	0.689704	0.506498	0.476022	0.204085	0.637909	0.0738397	0.32451	0.514339	0.120576	0.0976698	0.334474	0.168352	0.128037	0.333267	0.362845	0.309817	0.564518	0.432842	0.301923	0.656835	0.0630627	0.281009	0.0601196	0.127242	0.939851	0.686534	0.979578	0.533169	0.00675777	0.0446053	0.384639	0.0569115	0.0520405	0.816693
KNL1	0.0914961	0.0867654	0.0185272	0.487321	0.0210916	0.239204	0.944195	0.220016	0.12275	0.200404	0.113545	0.0246528	0.00449942	0.101486	0.120059	0.218971	0.284894	0.160506	0.860516	0.593358	0.636207	0.0419385	0.100962	0.656981	0.00956969	0.0303714	0.0125897	0.016189	0.0576585	0.604706	0.533275	0.033573	0.0533662	0.0284394	0.277761	0.102159	0.683643	0.629213	0.0161551	0.467546	0.638059	0.208041	0.124482	0.0526984	0.456269	0.851096	0.0722712	0.0534058	0.414014
ARHGEF38	0.46144	0.29225	0.0145322	0.313888	0.54765	0.0863002	0.0289198	0.675082	0.144432	0.0380108	0.0960577	0.138783	0.274886	0.0568047	0.0898439	0.994534	0.295887	0.354998	0.0951474	0.602706	0.0812395	0.251299	0.357465	0.035889	0.101242	0.260177	0.366648	0.197253	0.237293	0.330447	0.157883	0.788368	0.468815	0.271548	0.855717	0.140583	0.376261	0.0711956	0.380468	0.680701	0.315969	0.905083	0.785518	0.0304808	0.121544	0.0957416	0.160677	0.100794	0.692969
SLC6A2	0.0920396	0.0797125	0.0287759	0.267484	0.154366	0.141221	0.485643	0.262669	0.117391	0.0129917	0.932757	0.625641	0.0563315	0.211837	0.0403361	0.943308	0.0447909	0.0744936	0.0808498	0.398178	0.792825	0.00261057	0.0676468	0.0387513	0.0140312	0.0255674	0.134111	0.0634534	0.0398416	0.244471	0.0513873	0.927072	0.0152747	0.0322217	0.219341	0.0562833	0.421142	0.88979	0.226522	0.281519	0.351542	0.240836	0.69868	0.195831	0.359995	0.214744	0.107986	0.00505597	0.729637
KL	0.0471523	0.0497901	0.0504355	0.255958	0.142867	0.271651	0.396055	0.509156	0.28711	0.00707574	0.701557	0.985341	0.237818	0.474706	0.0302784	0.624672	0.0477587	0.0204901	0.021235	0.67791	0.828982	0.00614621	0.0242744	0.0068206	0.0482299	0.0279189	0.455776	0.179454	0.0574586	0.293709	0.0157414	0.721963	0.0259761	0.0503201	0.181576	0.159172	0.657748	0.867998	0.530466	0.0692433	0.0916716	0.334608	0.961677	0.263144	0.665437	0.0850374	0.267819	0.0353625	0.736379
TACR3	0.46165	0.511182	0.283272	0.67443	0.54968	0.449134	0.120339	0.893075	0.657044	0.383852	0.597493	0.623136	0.932986	0.719882	0.309113	0.782843	0.9412	0.333163	0.131136	0.606215	0.075901	0.782556	0.443384	0.162539	0.847019	0.7158	0.783161	0.674951	0.98928	0.960373	0.259564	0.899323	0.827524	0.574271	0.810403	0.501203	0.752685	0.21135	0.882222	0.208547	0.143263	0.872051	0.839505	0.20896	0.959889	0.296139	0.544537	0.698671	0.357022
MRC1	0.150464	0.0901921	0.0137217	0.274283	0.0401853	0.0923825	0.663317	0.0586319	0.0439503	0.156941	0.173667	0.0355909	0.000577123	0.0368247	0.0656929	0.221055	0.305561	0.174081	0.454757	0.486848	0.568883	0.0325251	0.149675	0.376209	0.0184972	0.0579094	0.011109	0.000800426	0.108441	0.386612	0.231216	0.0907125	0.0213869	0.032558	0.250151	0.0193904	0.260677	0.583042	0.0105026	0.476221	0.704564	0.218487	0.0957706	0.0584174	0.241572	0.674379	0.0272823	0.0162186	0.297848
CYP1A2	0.544401	0.360937	0.0196106	0.430799	0.672614	0.0905442	0.0953953	0.615673	0.122661	0.0689712	0.0565934	0.089391	0.170561	0.0351006	0.116761	0.792845	0.314945	0.495346	0.21223	0.490686	0.144148	0.257878	0.485284	0.102411	0.0683699	0.278954	0.185444	0.150134	0.218328	0.281426	0.282977	0.679702	0.43509	0.296756	0.789219	0.103079	0.318984	0.0955649	0.214664	0.946586	0.635107	0.917895	0.602337	0.0272894	0.0466918	0.246796	0.104585	0.058968	0.935191
CX3CR1	0.00864817	0.0666466	0.0256336	0.549295	0.00151097	0.331811	0.834602	0.555574	0.203206	0.0283298	0.671654	0.46294	0.0603165	0.449052	0.180413	0.900645	0.0217606	0.0353481	0.637655	0.435104	0.639253	0.000463274	0.00368765	0.369603	0.00392239	9.34877e-05	0.106232	0.216305	0.00376148	0.994282	0.450801	0.234954	0.0733383	0.000358257	0.154881	0.309872	0.629834	0.598103	0.291129	0.0766947	0.150979	0.0304473	0.854519	0.208882	0.731614	0.403172	0.242654	0.0886332	0.996176
ALOX5AP	0.899973	0.303141	0.419019	0.0836649	0.286041	0.427351	0.830336	0.00683539	0.267193	0.774607	0.331488	0.0880449	0.0933574	0.05367	0.393885	0.0548163	0.595442	0.758571	0.970921	0.54564	0.795352	0.364535	0.716467	0.942803	0.275551	0.481561	0.170052	0.022163	0.358836	0.135683	0.409446	0.278501	0.142739	0.556495	0.131332	0.31368	0.16832	0.613402	0.191663	0.986125	0.741762	0.524999	0.0181051	0.712608	0.17148	0.787523	0.464537	0.350693	0.330888
MAT1A	0.894201	0.645086	0.980617	0.163483	0.558385	0.98151	0.298904	0.999737	0.871199	0.384234	0.411905	0.396302	0.378177	0.875492	0.954156	0.198938	0.260302	0.570847	0.375832	0.866612	0.877701	0.676623	0.454954	0.290864	0.96123	0.679471	0.189331	0.565598	0.568695	0.863023	0.319002	0.330158	0.855481	0.878568	0.403211	0.385607	0.585837	0.844123	0.0534888	0.103802	0.0484701	0.647031	0.268617	0.419425	0.337032	0.0134044	0.24923	0.530862	0.0160562
NRXN2	0.331604	0.224116	0.12647	0.164996	0.436103	0.158094	0.162387	0.348423	0.197201	0.0194696	0.762306	0.949934	0.312526	0.295119	0.113851	0.519807	0.0625176	0.196524	0.0157073	0.386021	0.856028	0.0459126	0.205167	0.00639991	0.136148	0.156922	0.52186	0.249169	0.156333	0.220721	0.0200127	0.504192	0.130177	0.17429	0.371624	0.168485	0.352969	0.944042	0.741418	0.310025	0.27725	0.420117	0.85787	0.477896	0.40595	0.0517902	0.325996	0.0655532	0.839986
FLT3	0.00736328	0.0431433	0.0168171	0.643552	0.00857659	0.385887	0.719289	0.56454	0.234192	0.0504687	0.502132	0.285166	0.0313641	0.373362	0.104137	0.748277	0.0559332	0.0357262	0.700588	0.573158	0.778442	0.00163512	0.00827577	0.424259	0.000644857	0.000310026	0.0492879	0.112634	0.00378815	0.743269	0.474044	0.204322	0.0327235	0.00276183	0.178423	0.215273	0.773035	0.819333	0.111785	0.186301	0.282355	0.104993	0.538402	0.101754	0.902292	0.604236	0.154743	0.040547	0.764555
WWC1	0.766151	0.997034	0.297835	0.399822	0.92306	0.0168567	0.0332934	0.0885538	0.0469632	0.485668	0.394895	0.356255	0.164989	0.0602218	0.38693	0.731012	0.949013	0.922574	0.0866134	0.386288	0.260573	0.665373	0.74496	0.185557	0.734232	0.929218	0.286251	0.118926	0.774974	0.475208	0.17881	0.80036	0.553905	0.616672	0.669116	0.0136532	0.00119065	0.362896	0.234656	0.697227	0.645941	0.862578	0.526244	0.303372	0.0569549	0.633621	0.0563958	0.138593	0.247184
CBLN2	0.0512884	0.0235992	0.0975148	0.243484	0.0926389	0.440498	0.856618	0.253519	0.355282	0.0860836	0.770169	0.704857	0.113308	0.423582	0.0290997	0.705297	0.127053	0.0289309	0.150496	0.821591	0.690607	0.00981922	0.0393924	0.112836	0.0414481	0.0340506	0.261202	0.0491501	0.060228	0.166793	0.0437514	0.940057	0.000781831	0.0782814	0.0454381	0.141677	0.534726	0.809226	0.234849	0.143995	0.300949	0.353329	0.424112	0.314744	0.512995	0.349673	0.252147	0.0339632	0.792353
MTTP	0.803996	0.593735	0.849342	0.179757	0.520097	0.921635	0.219944	0.975641	0.934344	0.344871	0.507169	0.488201	0.423797	0.922946	0.828547	0.220504	0.321182	0.490425	0.282086	0.958389	0.896492	0.673752	0.411353	0.223384	0.97899	0.664051	0.206463	0.645453	0.613833	0.89074	0.263472	0.38777	0.892771	0.816999	0.473731	0.499232	0.653667	0.984802	0.0914536	0.0772477	0.0313898	0.698855	0.292662	0.59758	0.377506	0.0126611	0.349405	0.60551	0.0156739
PRR11	0.243215	0.400283	0.0664718	0.715976	0.0725229	0.0731795	0.956046	0.100712	0.0240579	0.284738	0.236936	0.117737	0.000100205	0.114085	0.350613	0.446344	0.367157	0.428815	0.853082	0.229515	0.978716	0.0579521	0.310944	0.776275	0.0632467	0.110352	0.000935389	0.0387508	0.226387	0.959608	0.699675	0.0272956	0.131334	0.0190816	0.524326	0.0300407	0.427279	0.845783	0.0145236	0.743937	0.884785	0.0624888	0.286888	0.152048	0.568749	0.839081	0.0172585	0.0389312	0.0898558
EPHA3	0.475987	0.656049	0.240137	0.788154	0.760113	0.393429	0.322488	0.896218	0.550019	0.651762	0.272686	0.286281	0.541577	0.609405	0.280372	0.692242	0.500871	0.488519	0.302609	0.529479	0.0338971	0.936302	0.694372	0.399898	0.788957	0.86261	0.666085	0.41543	0.758066	0.898882	0.536941	0.492244	0.72485	0.597981	0.461659	0.194053	0.50189	0.127445	0.234746	0.676479	0.635354	0.668344	0.692759	0.0387117	0.532137	0.988987	0.163548	0.4143	0.889608
GDA	0.145704	0.0272524	0.0247685	0.103218	0.0408495	0.180037	0.551112	0.0435321	0.114407	0.151091	0.321573	0.066247	0.012236	0.0482935	0.0242635	0.179075	0.281961	0.0999177	0.290158	0.703439	0.538336	0.0348384	0.107004	0.238395	0.0260698	0.0616595	0.0731299	0.000156083	0.0897669	0.14218	0.0765943	0.259446	0.00439544	0.0780756	0.0929333	0.0468749	0.221989	0.483765	0.0436196	0.31065	0.492442	0.35897	0.0631428	0.107676	0.19573	0.422621	0.0976526	0.030784	0.536977
E2F2	0.545997	0.669792	0.213011	0.670591	0.104826	0.12271	0.777835	0.0624283	0.0367325	0.524358	0.197964	0.116652	0.0028112	0.110466	0.754058	0.403927	0.399215	0.810984	0.66837	0.121543	0.790891	0.147721	0.559152	0.768906	0.145654	0.222678	0.0031868	0.107286	0.295699	0.79255	0.920684	0.00889797	0.334106	0.0684749	0.532742	0.143794	0.53252	0.691426	0.0672512	0.989235	0.62247	0.0348693	0.283823	0.435913	0.730331	0.718424	0.0984393	0.182756	0.0783161
ADH4	0.89676	0.550205	0.325979	0.981952	0.545424	0.0091748	0.607033	0.139333	0.00358426	0.5563	0.182978	0.291296	0.0249487	0.111958	0.820682	0.971763	0.6497	0.600594	0.966581	0.0208378	0.990147	0.420884	0.826611	0.954718	0.491229	0.679089	0.0175324	0.374908	0.869298	0.348664	0.767415	0.0578988	0.993062	0.158903	0.532977	0.0791016	0.29242	0.727882	0.18846	0.540631	0.358652	0.0635012	0.880912	0.486595	0.694878	0.721646	0.0430348	0.240321	0.0485619
BPI	0.587261	0.537454	0.162481	0.553399	0.232476	0.0795838	0.876094	0.0233796	0.0316164	0.561154	0.187063	0.0666393	0.000744349	0.0518906	0.396278	0.186593	0.68777	0.728378	0.855853	0.285498	0.796062	0.207004	0.674559	0.888503	0.181305	0.355215	0.00355613	0.0138983	0.483169	0.710053	0.637924	0.0487417	0.158926	0.144976	0.580339	0.0216932	0.131069	0.869047	0.0086615	0.871288	0.514287	0.216284	0.0971669	0.230455	0.241479	0.710924	0.0245927	0.0680271	0.0295065
SVEP1	0.0145375	0.0136294	0.0566871	0.310664	0.118788	0.564163	0.64373	0.810946	0.549484	0.00771394	0.673721	0.998645	0.364571	0.657147	0.0203457	0.682714	0.0293912	0.00416367	0.0664678	0.929559	0.769306	0.00558883	0.00440572	0.0175779	0.0233528	0.00894565	0.571499	0.25032	0.0146119	0.231787	0.0347528	0.652734	0.0192144	0.067455	0.113616	0.342525	0.956219	0.908412	0.609635	0.0435637	0.0397176	0.452903	0.982319	0.256726	0.769662	0.0844113	0.451025	0.064261	0.486617
IL10	0.0121283	0.000632993	0.0146698	0.219345	0.0405013	0.466347	0.742798	0.397447	0.383735	0.044843	0.684487	0.279928	0.0949103	0.279034	0.00166955	0.459404	0.130732	0.00407087	0.171673	0.922992	0.743676	0.00843102	0.00719356	0.0893369	0.00493874	0.0075523	0.222461	0.0186604	0.0154112	0.109873	0.0435293	0.674603	0.000273873	0.0576088	0.0613813	0.142653	0.670775	0.602435	0.129456	0.102292	0.143251	0.523677	0.255102	0.0714399	0.367185	0.26356	0.207779	0.0241422	0.935005
C1QB	0.0917107	0.0109851	0.0217155	0.0766837	0.0460628	0.22652	0.500462	0.0970405	0.16429	0.0589213	0.571235	0.203023	0.0390658	0.0938362	0.0118364	0.394399	0.122545	0.0454344	0.16119	0.692848	0.745657	0.010535	0.0480526	0.10169	0.012525	0.02707	0.144435	0.00386436	0.0342973	0.0902843	0.0296191	0.558004	0.00160603	0.0642826	0.0559292	0.0803121	0.326562	0.626678	0.129403	0.193779	0.290538	0.354008	0.181214	0.150014	0.24733	0.21515	0.163903	0.0235	0.812719
C1QC	0.089209	0.0131671	0.0231449	0.090249	0.0475277	0.221317	0.5303	0.0957216	0.158086	0.0615563	0.59491	0.216839	0.0342679	0.100646	0.013253	0.402693	0.125661	0.0472792	0.16545	0.676553	0.789114	0.00964532	0.0501988	0.107903	0.0128959	0.0272695	0.131301	0.00390869	0.0370506	0.101035	0.0331587	0.551005	0.00136094	0.0596161	0.0588477	0.0724308	0.322671	0.674046	0.118757	0.202909	0.315176	0.337211	0.186263	0.151947	0.254404	0.242264	0.150059	0.0203519	0.759838
SGCG	0.160973	0.0377155	0.232539	0.11863	0.309542	0.670871	0.480028	0.475281	0.682554	0.0788828	0.458272	0.87005	0.546403	0.60178	0.0412795	0.920728	0.115396	0.0479847	0.0418408	0.978238	0.782494	0.0630481	0.0796052	0.0241157	0.15107	0.121214	0.856077	0.215206	0.107244	0.0569337	0.00696793	0.363422	0.0244351	0.316097	0.0637783	0.414795	0.599632	0.991595	0.803856	0.11551	0.13233	0.73024	0.769919	0.593075	0.513818	0.0745887	0.689067	0.157871	0.549406
C1QA	0.105939	0.0143935	0.0261095	0.095844	0.041987	0.237428	0.597739	0.0737504	0.15934	0.103713	0.467035	0.132122	0.024008	0.0798271	0.0167223	0.261293	0.183158	0.0636074	0.246908	0.71878	0.698406	0.018106	0.0672011	0.17892	0.015248	0.0365921	0.102782	0.00124764	0.0480973	0.103805	0.0553062	0.407002	0.00158263	0.072228	0.0592453	0.0713461	0.300616	0.589257	0.0772765	0.251426	0.393639	0.360475	0.105083	0.136278	0.225154	0.332158	0.140311	0.0266827	0.663137
CSF2RB	0.225152	0.0236239	0.230596	0.172743	0.103932	0.91016	0.769924	0.196902	0.677034	0.521545	0.497984	0.123313	0.170308	0.259064	0.0954671	0.0533201	0.43797	0.160214	0.874398	0.807601	0.791115	0.175788	0.166543	0.728728	0.083742	0.137251	0.277881	0.0250787	0.0953551	0.074181	0.293621	0.396689	0.0171942	0.379358	0.0263722	0.460669	0.643172	0.540953	0.15618	0.440156	0.602346	0.732097	0.020975	0.37138	0.321044	0.695687	0.571123	0.265538	0.783778
PET117	0.944439	0.856473	0.226385	0.632408	0.799115	0.00180105	0.133271	0.0893528	0.00557679	0.363472	0.373034	0.399537	0.0520132	0.0705135	0.582833	0.994367	0.756366	0.902374	0.220233	0.122703	0.5986	0.408615	0.883542	0.315983	0.538559	0.790492	0.0912424	0.168589	0.987225	0.973766	0.407151	0.452897	0.609391	0.271121	0.619027	0.00728082	0.0271666	0.819566	0.178606	0.719339	0.574913	0.33929	0.769214	0.311819	0.222646	0.815539	0.0174787	0.0882373	0.114939
ALDH8A1	0.752675	0.607395	0.265834	0.617624	0.449799	0.0274604	0.833255	0.423745	0.0161038	0.44646	0.256396	0.42737	0.0406183	0.294749	0.852827	0.70104	0.587906	0.832847	0.935769	0.0511967	0.895227	0.337298	0.911098	0.97376	0.416513	0.498263	0.0228303	0.555782	0.766581	0.152912	0.629846	0.0561675	0.991714	0.0787114	0.444398	0.107711	0.639879	0.567618	0.197077	0.75278	0.554178	0.0474589	0.81452	0.354832	0.962486	0.636727	0.037593	0.223709	0.0968699
NLRP3	0.0768108	0.0158333	0.00168883	0.110858	0.0134791	0.142053	0.398531	0.151289	0.0967537	0.0449984	0.159281	0.0362629	0.0219278	0.0395635	0.018749	0.350433	0.147516	0.0541089	0.275574	0.66005	0.348128	0.0175266	0.0373441	0.156877	0.00516514	0.0165572	0.0915611	0.00501357	0.0278154	0.252331	0.0978998	0.200012	0.02391	0.0301008	0.16199	0.0833084	0.462781	0.330117	0.0879828	0.183683	0.212999	0.296955	0.178318	0.0398807	0.309921	0.213628	0.111163	0.038165	0.936822
GCSAML	0.843981	0.219596	0.739521	0.242925	0.501218	0.846498	0.756829	0.135458	0.953299	0.705181	0.481574	0.118874	0.380838	0.313269	0.329264	0.00135322	0.79517	0.659386	0.82548	0.575501	0.568193	0.80331	0.793775	0.779508	0.545913	0.769351	0.502015	0.0562767	0.638737	0.0655066	0.515822	0.456175	0.137063	0.917569	0.126664	0.621626	0.323487	0.35418	0.201092	0.977262	0.742158	0.730096	0.00043235	0.69926	0.178545	0.813909	0.800896	0.654367	0.497932
FIBIN	0.923701	0.625934	0.343207	0.862539	0.417289	0.0258416	0.810899	0.140112	0.00619838	0.443413	0.213303	0.339982	0.0290099	0.107385	0.700824	0.858978	0.29942	0.606816	0.709957	0.00150501	0.640626	0.274689	0.972761	0.839064	0.316095	0.46569	0.0139348	0.468606	0.500937	0.391158	0.643187	0.0640013	0.995446	0.117847	0.782138	0.20801	0.540053	0.493895	0.325234	0.569866	0.429314	0.0139669	0.974107	0.711103	0.850343	0.898805	0.130461	0.291454	0.103876
CES3	0.867757	0.365314	0.555163	0.56418	0.783523	0.0497341	0.950745	0.303601	0.0313545	0.772168	0.409891	0.581623	0.0635071	0.341981	0.62977	0.823193	0.83993	0.499966	0.815911	0.04371	0.686861	0.557602	0.678222	0.753229	0.688735	0.848732	0.032575	0.600439	0.903198	0.206215	0.536664	0.119319	0.9019	0.237005	0.394811	0.119936	0.414572	0.428761	0.215171	0.408082	0.208849	0.0982667	0.923656	0.630814	0.878282	0.393094	0.0603058	0.299768	0.0167627
CCL26	0.752889	0.614326	0.525882	0.166223	0.690881	0.226227	0.34622	0.00340893	0.205028	0.929087	0.310759	0.0945005	0.134069	0.0504072	0.381087	0.0449349	0.66176	0.973317	0.515316	0.785058	0.277663	0.810594	0.787463	0.740242	0.762839	0.914424	0.277696	0.0151246	0.860543	0.188762	0.263866	0.376504	0.265635	0.874333	0.538011	0.0942504	0.00284932	0.284618	0.118753	0.757536	0.485504	0.970468	0.0170421	0.527281	0.0531229	0.992151	0.227501	0.350551	0.164392
CCL24	0.69219	0.805843	0.638693	0.654686	0.496653	0.180031	0.906621	0.0212897	0.0807335	0.861825	0.173381	0.116443	0.0376002	0.0922073	0.826321	0.21335	0.947114	0.519864	0.472735	0.145679	0.976837	0.644206	0.685353	0.435979	0.587712	0.853511	0.0323694	0.171273	0.875644	0.893763	0.71166	0.0278632	0.702405	0.470549	0.831937	0.234495	0.223304	0.900272	0.129448	0.405556	0.169272	0.202465	0.164093	0.810369	0.466693	0.454987	0.215719	0.473204	0.021352
CPZ	0.825939	0.354977	0.415566	0.0483343	0.67359	0.276455	0.149307	0.122823	0.315289	0.202966	0.717971	0.991973	0.473529	0.23773	0.241699	0.933183	0.23737	0.49349	0.0563602	0.476274	0.934552	0.235129	0.559451	0.0619487	0.41436	0.500391	0.756931	0.221558	0.407933	0.0841463	0.0228236	0.437285	0.198921	0.566148	0.267187	0.301825	0.143094	0.912032	0.906596	0.549789	0.569199	0.667569	0.747018	0.915786	0.261815	0.0885822	0.61099	0.247221	0.949403
ANXA9	0.513504	0.858633	0.615553	0.263873	0.609726	0.0931508	0.0120772	0.207449	0.195846	0.47061	0.911734	0.934672	0.61859	0.196964	0.586674	0.748223	0.835921	0.794725	0.0474789	0.386895	0.517643	0.821083	0.641109	0.107756	0.986941	0.742341	0.830678	0.441543	0.747238	0.365525	0.12748	0.481237	0.825723	0.964365	0.740285	0.180912	0.0194609	0.55803	0.902899	0.775629	0.869902	0.975433	0.97539	0.812247	0.145101	0.275177	0.388994	0.383441	0.72403
LIF	0.95363	0.318853	0.797797	0.186837	0.633779	0.965819	0.958006	0.0613763	0.79788	0.695568	0.539046	0.153782	0.349448	0.237125	0.371511	0.00391205	0.767172	0.815765	0.979488	0.738696	0.595313	0.842963	0.977931	0.87268	0.645926	0.916207	0.486903	0.0463766	0.778685	0.0511747	0.427207	0.551321	0.156438	0.85857	0.162918	0.500508	0.155052	0.388482	0.216787	0.842547	0.594448	0.753134	0.00101391	0.799843	0.114231	0.858293	0.726478	0.607782	0.379254
CYP2B6	0.404408	0.351913	0.7536	0.705472	0.992373	0.0305585	0.212305	0.0949639	0.0456716	0.923728	0.461376	0.579822	0.26103	0.193018	0.691498	0.921966	0.840063	0.375406	0.642784	0.1213	0.679538	0.96153	0.419136	0.864657	0.787746	0.652346	0.336637	0.540473	0.472736	0.532507	0.872121	0.363761	0.730623	0.639266	0.473192	0.173378	0.0844987	0.982627	0.582494	0.570396	0.382369	0.330596	0.95523	0.909129	0.643493	0.959862	0.214292	0.618813	0.176735
TNIK	0.628779	0.546966	0.0581327	0.413031	0.43895	0.0156594	0.390695	0.0813979	0.00677963	0.130721	0.203294	0.162837	0.00416147	0.0143255	0.290969	0.681929	0.203574	0.711884	0.422877	0.0773467	0.881152	0.0840541	0.604453	0.326569	0.0529715	0.222179	0.00589263	0.0456241	0.209698	0.45368	0.402005	0.346248	0.216544	0.104783	0.813229	0.0151028	0.127721	0.811651	0.0673889	0.754656	0.72711	0.225619	0.425045	0.185823	0.0928452	0.638234	0.0213139	0.0109775	0.148161
NEXMIF	0.824531	0.93895	0.355481	0.382676	0.827758	0.0138382	0.195522	0.0341369	0.0167441	0.381495	0.630102	0.571127	0.0766355	0.0722512	0.626738	0.976916	0.538857	0.863478	0.253944	0.0817646	0.983132	0.344253	0.87266	0.333911	0.510861	0.76387	0.130018	0.166295	0.838966	0.646076	0.325547	0.701116	0.48845	0.356926	0.990005	0.0331325	0.0243644	0.93114	0.308594	0.695031	0.531621	0.305876	0.702042	0.631705	0.196626	0.669724	0.0840502	0.11482	0.135761
LRRN1	0.86041	0.589793	0.767139	0.386784	0.481381	0.725133	0.829924	0.0420791	0.533234	0.514681	0.211553	0.0407204	0.189383	0.179235	0.665067	0.00116984	0.549372	0.915048	0.575804	0.961211	0.457369	0.970012	0.853737	0.464711	0.747611	0.996739	0.257697	0.0582762	0.993885	0.394144	0.875388	0.0952235	0.355065	0.960548	0.378129	0.424364	0.195132	0.41497	0.108578	0.699123	0.38584	0.919538	0.000781994	0.685613	0.256194	0.486247	0.508368	0.713389	0.168418
GDAP1L1	0.951213	0.681743	0.938716	0.160799	0.587891	0.922736	0.360822	0.985565	0.83472	0.416416	0.364456	0.350926	0.35836	0.848405	0.968064	0.193414	0.23324	0.627588	0.4465	0.813034	0.744287	0.682656	0.48914	0.344234	0.950941	0.693182	0.186311	0.524067	0.547165	0.84805	0.363068	0.304116	0.834822	0.918064	0.369251	0.329168	0.55089	0.74408	0.0398683	0.129064	0.0664663	0.620575	0.261709	0.329999	0.320448	0.0163999	0.203016	0.492811	0.0190381
NAALAD2	0.485814	0.278815	0.0201432	0.227418	0.520913	0.0983251	0.0228455	0.656988	0.158099	0.0259493	0.140044	0.193305	0.333481	0.061014	0.106019	0.888719	0.203136	0.350127	0.089041	0.538674	0.125099	0.222727	0.327551	0.0270795	0.098416	0.235852	0.446339	0.24168	0.186663	0.30064	0.134766	0.901121	0.489773	0.276098	0.966161	0.204526	0.432054	0.101466	0.5337	0.60568	0.247211	0.83695	0.884471	0.0673951	0.1599	0.0442455	0.243885	0.131356	0.550213
HPGDS	0.897807	0.856639	0.829074	0.677233	0.390356	0.675809	0.427994	0.0749559	0.407447	0.587145	0.262998	0.109618	0.119432	0.262477	0.926384	0.0480627	0.89465	0.742077	0.234495	0.544891	0.926818	0.755397	0.877189	0.226381	0.603432	0.797924	0.108229	0.18185	0.769131	0.878023	0.626678	0.0327725	0.520355	0.667903	0.450814	0.54142	0.500567	0.964508	0.145727	0.571907	0.257526	0.406359	0.0437995	0.90836	0.599676	0.319899	0.506737	0.717422	0.0798056
APOA5	0.433495	0.479324	0.051968	0.938722	0.710596	0.160016	0.159359	0.886953	0.25137	0.296194	0.0728684	0.094127	0.25182	0.200835	0.125722	0.620761	0.927083	0.440755	0.206233	0.896641	0.0180431	0.592155	0.582526	0.203077	0.329034	0.559133	0.30995	0.188413	0.775595	0.702519	0.386658	0.4499	0.529242	0.394728	0.478972	0.0643118	0.319108	0.0464485	0.10192	0.879005	0.666335	0.775129	0.54376	0.00224079	0.158165	0.716502	0.0496662	0.130566	0.780983
IRX1	0.741961	0.608253	0.96997	0.451146	0.972816	0.923075	0.658079	0.174629	0.94328	0.367219	0.484254	0.167231	0.610654	0.404382	0.409422	0.00422802	0.121336	0.988666	0.720073	0.29982	0.103911	0.548949	0.642069	0.9347	0.701959	0.492067	0.84223	0.0969741	0.400521	0.1904	0.414451	0.590385	0.394796	0.515398	0.654636	0.377143	0.050962	0.106778	0.201864	0.795828	0.536866	0.290859	0.00518296	0.566686	0.116857	0.591162	0.585745	0.832007	0.383665
APOC3	0.970815	0.675306	0.236866	0.987086	0.545564	0.00472386	0.516856	0.139812	0.00229032	0.47626	0.183058	0.261747	0.014652	0.0974791	0.953403	0.967664	0.687317	0.747993	0.810896	0.0433886	0.856227	0.368974	0.913822	0.850663	0.429461	0.630176	0.0125902	0.267896	0.861966	0.46053	0.958254	0.0775462	0.819599	0.135902	0.535571	0.0305513	0.206383	0.857106	0.11378	0.597591	0.40582	0.100567	0.800995	0.327992	0.543185	0.747764	0.0149469	0.142796	0.0405709
KCNT2	0.616729	0.923887	0.207184	0.88911	0.127706	0.0562663	0.923827	0.314941	0.0192846	0.269297	0.220231	0.34788	0.0476838	0.213113	0.821391	0.674018	0.171662	0.97121	0.696212	0.0151738	0.690845	0.149263	0.543382	0.915776	0.20099	0.202968	0.035897	0.57745	0.279185	0.209569	0.650323	0.0257284	0.942061	0.0279713	0.975036	0.340594	0.949905	0.468448	0.431233	0.854195	0.986998	0.00113099	0.818727	0.567939	0.653848	0.883459	0.192999	0.358253	0.382297
IRX2	0.858895	0.485543	0.904576	0.305926	0.681863	0.892175	0.800625	0.0797076	0.832455	0.425334	0.470002	0.127523	0.467099	0.337655	0.433631	0.00170855	0.244779	0.889809	0.877803	0.424627	0.194345	0.75577	0.828256	0.825266	0.865592	0.70118	0.712523	0.0643553	0.610299	0.219225	0.430463	0.387139	0.303834	0.713156	0.380001	0.420567	0.0870957	0.199714	0.202683	0.991159	0.631928	0.564597	0.00142901	0.665658	0.211586	0.660269	0.631558	0.841706	0.386993
RETN	0.00224857	0.018111	0.0377376	0.510444	0.0784205	0.584594	0.741359	0.914633	0.574766	0.00448043	0.758624	0.994606	0.386577	0.801028	0.0304417	0.539063	0.0310259	0.0012624	0.103161	0.978648	0.820902	0.00496756	0.000553145	0.0284732	0.0196692	0.00306844	0.565569	0.361958	0.0126234	0.479544	0.088241	0.816901	0.0439888	0.0330266	0.193353	0.389534	0.669977	0.87967	0.613172	0.0211978	0.0160431	0.385122	0.78818	0.17516	0.962509	0.114282	0.422377	0.0797109	0.403159
DUSP26	0.540147	0.839916	0.112677	0.75542	0.16623	0.0113623	0.717879	0.0872295	0.00205312	0.284943	0.211527	0.19651	0.00143376	0.0845086	0.683273	0.834889	0.364087	0.80107	0.830443	0.0532839	0.965537	0.11686	0.582794	0.778653	0.167009	0.244231	0.00309814	0.1379	0.408083	0.599222	0.857565	0.0334571	0.435741	0.0281473	0.918659	0.0355836	0.356841	0.729762	0.0797708	0.953661	0.739173	0.023193	0.627773	0.276775	0.693027	0.94316	0.0191102	0.0850358	0.0872787
C11orf86	0.763572	0.607764	0.394241	0.725107	0.680443	0.00599418	0.29756	0.062541	0.00648	0.608496	0.326259	0.380447	0.0579424	0.100312	0.99937	0.965846	0.855204	0.641281	0.595395	0.0686335	0.76642	0.536887	0.729263	0.735732	0.719322	0.907547	0.0859158	0.280612	0.859303	0.61441	0.785374	0.198892	0.878906	0.288409	0.620097	0.0467569	0.0840195	0.926841	0.250116	0.657688	0.427333	0.172065	0.78629	0.552044	0.508755	0.933115	0.053889	0.255667	0.0784299
FCER2	0.00126243	0.00850499	0.0756991	0.473074	0.0423817	0.839427	0.987891	0.9038	0.769471	0.0191273	0.682523	0.995273	0.465859	0.932638	0.047935	0.670952	0.0324098	0.000583173	0.228208	0.890439	0.693973	0.00737113	4.32116e-05	0.0896073	0.0242662	0.00192194	0.657335	0.401332	0.00667373	0.474913	0.134174	0.887597	0.0380271	0.0478037	0.0855663	0.602212	0.478566	0.78578	0.701035	0.00943252	0.0108044	0.370628	0.901447	0.280383	0.776012	0.144027	0.633164	0.162831	0.328825
CLEC4G	0.690386	0.541984	0.962586	0.17106	0.632286	0.927756	0.94641	0.0236803	0.748493	0.489165	0.572256	0.189659	0.400297	0.25395	0.667166	0.00707738	0.642174	0.908468	0.781915	0.891452	0.673909	0.976991	0.799413	0.626474	0.922224	0.865768	0.561334	0.0914047	0.981343	0.158203	0.585296	0.423493	0.311052	0.769793	0.185119	0.624927	0.149155	0.532713	0.33978	0.796154	0.472528	0.928443	0.00355499	0.890289	0.243942	0.77088	0.865903	0.879085	0.33289
CDKL5	0.200327	0.329396	0.0403337	0.508926	0.33589	0.0354121	0.291111	0.335174	0.0435631	0.0148151	0.916417	0.794085	0.0601986	0.230393	0.122489	0.566218	0.0989173	0.212219	0.0435431	0.228204	0.849613	0.0169313	0.203399	0.0282567	0.0669666	0.0986798	0.1221	0.15387	0.179988	0.580199	0.100019	0.95153	0.111012	0.0333978	0.669273	0.0189611	0.308692	0.798819	0.25644	0.461	0.528759	0.207698	0.902344	0.181895	0.407271	0.293369	0.0388555	0.00426701	0.548
SLPI	0.464523	0.619174	0.165869	0.806164	0.769636	0.310023	0.295057	0.958588	0.443068	0.568791	0.176096	0.193048	0.411997	0.461589	0.225899	0.616755	0.568497	0.492332	0.29447	0.619927	0.0252773	0.851156	0.690625	0.366126	0.636997	0.788244	0.49962	0.31763	0.864908	0.992298	0.525557	0.439927	0.655557	0.538391	0.431705	0.126471	0.421007	0.0920061	0.147091	0.797408	0.714865	0.676225	0.600523	0.015265	0.365901	0.986155	0.0985467	0.291634	0.769771
SLC6A3	0.411973	0.968949	0.156133	0.972963	0.34267	0.0181386	0.501642	0.418053	0.0198417	0.12597	0.772791	0.870453	0.0710165	0.390362	0.670969	0.347878	0.275553	0.620305	0.332754	0.0863525	0.718541	0.107412	0.479828	0.322765	0.293368	0.269982	0.0985395	0.475969	0.527181	0.410575	0.624148	0.412267	0.575304	0.0287161	0.811634	0.0597678	0.549046	0.435625	0.353897	0.645408	0.859914	0.0442985	0.543878	0.353025	0.949812	0.743964	0.0431755	0.0905795	0.326372
RAB38	0.825135	0.429138	0.213082	0.272835	0.255519	0.18021	0.67072	0.0138697	0.102827	0.806439	0.0463074	0.00295245	0.0185914	0.0169985	0.363192	0.0244715	0.961764	0.818809	0.985072	0.568878	0.294049	0.459588	0.804669	0.985366	0.282371	0.543411	0.0451343	0.00621325	0.581012	0.413229	0.587043	0.0335207	0.228756	0.396133	0.492127	0.0950922	0.101486	0.301474	0.0244088	0.852471	0.609446	0.528888	0.00830979	0.241907	0.129331	0.875992	0.121941	0.233279	0.144097
UGT1A1	0.75792	0.432229	0.102823	0.262897	0.727566	0.19867	0.197011	0.543421	0.200799	0.078074	0.208188	0.271511	0.299183	0.0606074	0.287807	0.992703	0.105351	0.666571	0.388826	0.270497	0.577195	0.222436	0.5423	0.179557	0.0729355	0.266602	0.289987	0.307283	0.108637	0.20711	0.365534	0.973891	0.522311	0.395572	0.893355	0.351793	0.50373	0.355183	0.569436	0.872856	0.681632	0.719357	0.782897	0.285272	0.111054	0.142598	0.388488	0.155974	0.893661
ABI3BP	0.514333	0.185176	0.376279	0.0774671	0.398447	0.486583	0.567068	0.157389	0.419121	0.186224	0.671514	0.944492	0.352755	0.322531	0.219558	0.8996	0.103533	0.319535	0.227249	0.488841	0.542701	0.0978232	0.308767	0.171798	0.187258	0.226424	0.547134	0.190711	0.140031	0.0808544	0.0738395	0.621465	0.0811619	0.384978	0.0825998	0.416705	0.396853	0.782852	0.75775	0.461551	0.541856	0.466785	0.596857	0.933468	0.395332	0.169762	0.682721	0.206524	0.98088
GXYLT2	0.391068	0.0834946	0.277915	0.0376104	0.315076	0.476921	0.407489	0.140427	0.443884	0.156617	0.714059	0.818599	0.356684	0.290622	0.0916611	0.753686	0.150096	0.177805	0.102995	0.726961	0.84203	0.0931035	0.214151	0.0823292	0.180449	0.204582	0.635142	0.106204	0.150507	0.0353446	0.0145686	0.608257	0.0349634	0.377225	0.051652	0.334156	0.306691	0.933847	0.676106	0.282452	0.354388	0.60466	0.460792	0.733597	0.323454	0.107766	0.62625	0.175627	0.871215
TTR	0.610756	0.937031	0.449959	0.264485	0.901156	0.0593861	0.175001	0.00648034	0.0664189	0.863206	0.274043	0.151947	0.0961353	0.0271965	0.503995	0.224468	0.790607	0.75684	0.380395	0.411306	0.323436	0.764979	0.623244	0.577628	0.761129	0.859331	0.186705	0.0414607	0.785319	0.354078	0.311739	0.435251	0.447802	0.750252	0.955036	0.0355892	0.000206516	0.376795	0.136232	0.54382	0.369556	0.799452	0.128309	0.480764	0.0419784	0.946182	0.106937	0.237603	0.0997521
FCN1	0.00249357	0.0116894	0.0643695	0.480875	0.0666446	0.774289	0.944157	0.892663	0.71656	0.0113698	0.707811	0.988974	0.444255	0.872235	0.0434791	0.622602	0.0228232	0.00142004	0.196267	0.971171	0.685068	0.00581612	0.000274688	0.0665735	0.0172631	0.00196724	0.611011	0.397283	0.00489675	0.425897	0.12615	0.814355	0.0401475	0.0485258	0.115251	0.54947	0.53083	0.804986	0.683009	0.0218767	0.0171868	0.39	0.863058	0.257989	0.892267	0.129363	0.58143	0.124744	0.357471
RGS13	0.411478	0.638013	0.247037	0.695184	0.812751	0.414567	0.36581	0.837167	0.583416	0.630021	0.391	0.38703	0.540548	0.708281	0.240838	0.752339	0.494378	0.431368	0.239432	0.487343	0.0610652	0.891818	0.664656	0.344679	0.785958	0.847472	0.663615	0.416509	0.740806	0.922534	0.487107	0.602999	0.637382	0.580548	0.463161	0.157883	0.486562	0.179334	0.209971	0.662464	0.651529	0.637939	0.74188	0.0348492	0.523772	0.930204	0.135832	0.343519	0.822875
SPP2	0.465181	0.974795	0.81481	0.202842	0.864032	0.239431	0.497945	0.0014033	0.189587	0.816136	0.479567	0.24922	0.173016	0.0754489	0.78104	0.142253	0.827348	0.607969	0.790765	0.415289	0.717049	0.85903	0.543724	0.996737	0.89321	0.787505	0.273743	0.0835525	0.831892	0.317678	0.494762	0.455118	0.469329	0.956834	0.587596	0.198428	0.0108647	0.688102	0.274166	0.500107	0.263341	0.715459	0.0801902	0.987966	0.12213	0.907025	0.369163	0.493925	0.103332
KCNA6	0.482413	0.668493	0.286175	0.804777	0.745818	0.442405	0.326187	0.865493	0.612618	0.681393	0.344211	0.355456	0.629802	0.694311	0.312674	0.755569	0.487964	0.480131	0.298533	0.49103	0.0413398	0.971807	0.684533	0.405057	0.870477	0.893354	0.780542	0.481458	0.717142	0.848297	0.528974	0.538151	0.765563	0.628382	0.493274	0.247581	0.55683	0.152764	0.312531	0.593498	0.56896	0.674596	0.762298	0.0624086	0.644182	0.971893	0.218863	0.496627	0.988663
TREH	0.79187	0.587474	0.831391	0.183286	0.515766	0.90823	0.210992	0.972307	0.943405	0.340665	0.5222	0.502782	0.43151	0.929814	0.811456	0.224839	0.331451	0.480498	0.271116	0.971446	0.86514	0.674053	0.406486	0.215793	0.981536	0.662613	0.210134	0.657713	0.621095	0.894893	0.257274	0.397366	0.898273	0.808803	0.485077	0.517174	0.664137	0.960679	0.0987616	0.0747538	0.0299214	0.706889	0.29734	0.625282	0.384531	0.0129321	0.365977	0.617113	0.0160413
HRH4	0.792848	0.374687	0.882823	0.234438	0.883926	0.636804	0.879893	0.177996	0.760945	0.437978	0.703784	0.257072	0.733164	0.45774	0.464638	0.00262195	0.506057	0.908058	0.885312	0.402133	0.515638	0.794777	0.861694	0.746301	0.96431	0.796898	0.896948	0.139677	0.97564	0.0380767	0.494267	0.812146	0.268568	0.482632	0.191489	0.837793	0.244162	0.297765	0.415205	0.814032	0.624092	0.398497	0.00224924	0.997796	0.156578	0.808228	0.896316	0.962478	0.616499
SLC2A2	0.62279	0.519799	0.574677	0.289566	0.481082	0.709603	0.12426	0.922381	0.910805	0.314616	0.810938	0.786201	0.599467	0.957512	0.569094	0.345131	0.557833	0.366554	0.15721	0.823521	0.424698	0.702062	0.3686	0.145095	0.977338	0.664056	0.318199	0.881991	0.765488	0.967746	0.204007	0.602832	0.992057	0.696703	0.712545	0.859324	0.857945	0.600013	0.312077	0.0657385	0.0267163	0.856778	0.420182	0.882329	0.544095	0.0369169	0.712505	0.834631	0.043948
APOC2	0.488123	0.681345	0.302506	0.786812	0.753127	0.458386	0.342601	0.857244	0.62955	0.706096	0.357102	0.367002	0.642345	0.717511	0.325069	0.753135	0.469378	0.488303	0.310409	0.479323	0.0441802	0.989867	0.695817	0.423335	0.89361	0.910257	0.792523	0.493849	0.696567	0.831284	0.543943	0.53783	0.774869	0.641178	0.491328	0.256271	0.565517	0.160632	0.31703	0.596264	0.579776	0.66959	0.764271	0.0674788	0.662576	0.996882	0.226194	0.513075	0.981578
HMGCS2	0.613266	0.435657	0.0349387	0.55513	0.772267	0.113617	0.191582	0.601728	0.131596	0.121733	0.0492746	0.0781272	0.135768	0.0374591	0.157294	0.666613	0.373641	0.613126	0.340861	0.459726	0.209617	0.295005	0.600017	0.19655	0.0702284	0.323182	0.119682	0.142408	0.24335	0.284839	0.412985	0.613284	0.43585	0.339318	0.741349	0.0963184	0.303799	0.130303	0.144329	0.71255	0.895942	0.941684	0.502549	0.0335382	0.0290111	0.429412	0.0878147	0.0521784	0.690692
RBM44	0.951213	0.681743	0.938716	0.160799	0.587891	0.922736	0.360822	0.985565	0.83472	0.416416	0.364456	0.350926	0.35836	0.848405	0.968064	0.193414	0.23324	0.627588	0.4465	0.813034	0.744287	0.682656	0.48914	0.344234	0.950941	0.693182	0.186311	0.524067	0.547165	0.84805	0.363068	0.304116	0.834822	0.918064	0.369251	0.329168	0.55089	0.74408	0.0398683	0.129064	0.0664663	0.620575	0.261709	0.329999	0.320448	0.0163999	0.203016	0.492811	0.0190381
HAO2	0.951213	0.681743	0.938716	0.160799	0.587891	0.922736	0.360822	0.985565	0.83472	0.416416	0.364456	0.350926	0.35836	0.848405	0.968064	0.193414	0.23324	0.627588	0.4465	0.813034	0.744287	0.682656	0.48914	0.344234	0.950941	0.693182	0.186311	0.524067	0.547165	0.84805	0.363068	0.304116	0.834822	0.918064	0.369251	0.329168	0.55089	0.74408	0.0398683	0.129064	0.0664663	0.620575	0.261709	0.329999	0.320448	0.0163999	0.203016	0.492811	0.0190381
RAMP1	0.75132	0.587531	0.315147	0.696608	0.554868	0.244198	0.914084	0.0693271	0.143524	0.786759	0.280896	0.113683	0.0137197	0.105156	0.402079	0.108499	0.865006	0.872769	0.962713	0.46048	0.902848	0.3618	0.90315	0.995818	0.243901	0.537199	0.0137068	0.0251569	0.578151	0.417602	0.716253	0.189389	0.154878	0.385302	0.636081	0.0500675	0.117378	0.811932	0.0089336	0.523751	0.289635	0.549651	0.0555218	0.302079	0.0971099	0.514044	0.061603	0.08412	0.0162207
PAMR1	0.33187	0.230147	0.115837	0.170196	0.469972	0.141874	0.0900909	0.401707	0.207716	0.018927	0.784941	0.952123	0.37219	0.311621	0.0937304	0.483332	0.103601	0.17938	0.00347246	0.482297	0.933689	0.0697191	0.212047	0.00131769	0.184276	0.197506	0.627092	0.26415	0.224765	0.241168	0.00997853	0.466434	0.157213	0.197862	0.459136	0.152778	0.317416	0.899247	0.77376	0.259627	0.215248	0.515293	0.805608	0.406068	0.406149	0.0374268	0.311062	0.0759729	0.735152
NEURL1	0.851735	0.512146	0.201666	0.345989	0.31421	0.129552	0.670313	0.0142798	0.0682855	0.762874	0.0498766	0.0058416	0.00949217	0.0143867	0.387878	0.04293	0.926417	0.885792	0.958411	0.453028	0.362787	0.427797	0.866247	0.990424	0.263155	0.548404	0.0225349	0.00700984	0.593497	0.455824	0.625164	0.0384575	0.239039	0.35896	0.598758	0.0594311	0.0798813	0.371799	0.0151658	0.726847	0.497282	0.48337	0.016783	0.225954	0.105116	0.808033	0.0756438	0.170335	0.0822785
FBLN7	0.568694	0.216706	0.295552	0.10134	0.73771	0.337014	0.133324	0.279014	0.423203	0.142606	0.676569	0.991574	0.513102	0.323547	0.0857689	0.945688	0.297025	0.279967	0.00968387	0.783746	0.865927	0.214307	0.414428	0.0128201	0.342822	0.432815	0.808296	0.18357	0.39382	0.0416568	0.00433036	0.30128	0.109952	0.552967	0.321289	0.21381	0.149242	0.703537	0.74455	0.455041	0.426851	0.955365	0.739346	0.590291	0.1753	0.0911844	0.483826	0.141755	0.859059
KIF12	0.97733	0.566254	0.318835	0.825395	0.605674	0.0129736	0.670163	0.183296	0.00675046	0.59278	0.208909	0.307971	0.0219633	0.150124	0.904753	0.979087	0.771455	0.654393	0.976959	0.0471361	0.961542	0.441423	0.827185	0.975157	0.50542	0.703869	0.0139697	0.347156	0.947886	0.353738	0.779375	0.0671691	0.915761	0.164868	0.474722	0.0497866	0.26696	0.745968	0.122551	0.515505	0.318202	0.102231	0.842037	0.390718	0.637738	0.583668	0.0222883	0.189596	0.0262682
FOSB	0.615327	0.883539	0.80621	0.621125	0.391548	0.4899	0.307112	0.273504	0.609641	0.839383	0.756112	0.51671	0.527641	0.318876	0.330344	0.223393	0.380482	0.856104	0.225454	0.777871	0.315086	0.789255	0.474383	0.446075	0.912327	0.505027	0.64068	0.150004	0.481899	0.0902739	0.239269	0.66537	0.405816	0.59443	0.84397	0.117202	0.00265015	0.241272	0.216577	0.3707	0.328347	0.268883	0.165471	0.483047	0.00437064	0.824637	0.27556	0.309673	0.215375
SERPIND1	0.886372	0.688525	0.262994	0.946065	0.506113	0.00762671	0.557227	0.164871	0.00469286	0.460413	0.301898	0.384381	0.0225869	0.16123	0.958628	0.904173	0.672214	0.829691	0.745316	0.0540784	0.974061	0.340199	0.988505	0.806058	0.46967	0.606242	0.0238973	0.315704	0.883671	0.393198	0.997312	0.106224	0.791828	0.117082	0.584592	0.036221	0.250436	0.707913	0.149165	0.735628	0.483889	0.0806179	0.92213	0.374987	0.693681	0.76163	0.0199746	0.153829	0.0541004
ENTPD8	0.507801	0.867216	0.651636	0.472048	0.982478	0.124271	0.353391	0.0152682	0.124372	0.791134	0.271022	0.151696	0.124171	0.0711387	0.696481	0.141882	0.48884	0.583542	0.63872	0.531416	0.340382	0.981746	0.445524	0.922995	0.98906	0.64772	0.19616	0.0709529	0.538949	0.527183	0.553818	0.318444	0.573566	0.915188	0.909351	0.060235	0.00140489	0.424941	0.107828	0.394389	0.199765	0.899128	0.0934627	0.552546	0.0731708	0.659312	0.127621	0.363353	0.041163
GJB1	0.59959	0.951023	0.0671181	0.959639	0.530394	0.000811433	0.29006	0.356014	0.00166939	0.13727	0.221848	0.351379	0.0203231	0.112875	0.563831	0.662985	0.413638	0.842951	0.361731	0.0669457	0.728157	0.182682	0.71858	0.33316	0.2148	0.364867	0.020236	0.276637	0.581663	0.593993	0.699814	0.241642	0.657301	0.0543746	0.45959	0.00946105	0.274248	0.987013	0.123959	0.865833	0.81868	0.144431	0.877958	0.113131	0.459807	0.850696	0.00275377	0.0353026	0.170515
NECTIN1	0.13502	0.104024	0.0118925	0.335591	0.135107	0.0632279	0.500594	0.104661	0.0414387	0.0731629	0.405379	0.170231	0.00240075	0.0655203	0.0309856	0.46931	0.235783	0.140996	0.16857	0.451161	0.737684	0.0173287	0.155801	0.137099	0.0176492	0.0631337	0.0197159	0.00274195	0.12101	0.274063	0.103863	0.375123	0.0102134	0.0345158	0.340921	0.00330783	0.170271	0.717407	0.0178484	0.516054	0.700513	0.297226	0.238701	0.0527952	0.150585	0.555501	0.0112601	0.000666219	0.285533
TNFSF15	0.920048	0.446001	0.857342	0.379856	0.642389	0.949486	0.665642	0.113906	0.828898	0.551459	0.379139	0.103732	0.317293	0.279121	0.552337	0.00154234	0.688139	0.977119	0.591602	0.791792	0.653378	0.936454	0.927605	0.536378	0.645582	0.938318	0.366302	0.083148	0.797874	0.157541	0.79957	0.32273	0.258519	0.869138	0.26407	0.591469	0.285495	0.448061	0.164894	0.645038	0.42123	0.821402	0.000963712	0.780871	0.17519	0.559066	0.715973	0.694877	0.268406
GPC5	0.923049	0.383121	0.696439	0.144631	0.788607	0.592744	0.627222	0.025733	0.528038	0.959589	0.789942	0.323748	0.282862	0.186193	0.27382	0.0590722	0.87357	0.788161	0.478266	0.964538	0.664531	0.694624	0.979551	0.650606	0.67122	0.951482	0.466232	0.0310002	0.886288	0.0336392	0.170719	0.882298	0.113422	0.972661	0.23536	0.227569	0.0265589	0.494382	0.225465	0.870688	0.601087	0.824162	0.0219258	0.764952	0.0551856	0.914909	0.477541	0.354612	0.2927
TNFAIP6	0.692218	0.44832	0.897852	0.181998	0.96936	0.895878	0.578691	0.0862509	0.872091	0.580504	0.550463	0.185845	0.559384	0.239108	0.32291	0.00599401	0.408169	0.956401	0.638093	0.509611	0.237724	0.793337	0.727799	0.86864	0.995578	0.675346	0.778123	0.058953	0.762341	0.0246813	0.259537	0.857385	0.258853	0.533318	0.385405	0.415418	0.0334751	0.137927	0.277166	0.729848	0.568672	0.347626	0.00265809	0.722506	0.0343793	0.945677	0.705298	0.684732	0.462891
CPE	0.12266	0.0174779	0.131709	0.207995	0.37778	0.589225	0.467869	0.407521	0.618033	0.148738	0.808682	0.663324	0.318065	0.433995	0.0021318	0.523696	0.396991	0.0345404	0.0260981	0.654599	0.711879	0.107874	0.115969	0.0273683	0.131945	0.173823	0.577247	0.0414054	0.211287	0.0162761	0.00308392	0.58673	0.00189468	0.357521	0.130151	0.135003	0.277527	0.534931	0.261395	0.234463	0.290051	0.902554	0.304066	0.198114	0.159147	0.269548	0.308197	0.0487781	0.969716
NINJ2	0.428948	0.481374	0.0344901	0.45149	0.0929526	0.0115258	0.55185	0.0458497	0.00185878	0.210968	0.0716138	0.0384851	5.22799e-05	0.0165648	0.366959	0.471803	0.332713	0.58272	0.710394	0.121718	0.638919	0.0829927	0.421557	0.618688	0.0682606	0.155891	0.00138871	0.0285902	0.248172	0.965633	0.596688	0.0191089	0.24531	0.0272841	0.690722	0.0203639	0.257644	0.785662	0.0302464	0.83953	0.93253	0.0672093	0.294871	0.123941	0.388635	0.833592	0.0137289	0.0476528	0.152507
CXCL14	0.739764	0.430395	0.685462	0.0714227	0.844706	0.504411	0.363291	0.0156075	0.481577	0.953588	0.60975	0.234421	0.346777	0.109795	0.292595	0.0551971	0.808558	0.89859	0.411886	0.977496	0.401132	0.831487	0.866553	0.582854	0.77154	0.914951	0.577455	0.0326931	0.986212	0.0252058	0.135951	0.879956	0.193581	0.854201	0.301147	0.252633	0.0105949	0.281156	0.306228	0.852714	0.66404	0.730167	0.020771	0.764855	0.0344888	0.720501	0.536579	0.452005	0.419382
MEGF6	0.618911	0.182239	0.270306	0.0458507	0.588542	0.272852	0.125711	0.106871	0.324789	0.205832	0.881038	0.715352	0.35986	0.187687	0.0747643	0.712928	0.387076	0.303225	0.0197977	0.779305	0.702827	0.224942	0.4461	0.031966	0.343061	0.454697	0.670488	0.0746051	0.429304	0.0277657	0.00285901	0.534268	0.0736637	0.539078	0.229434	0.153136	0.0684998	0.573366	0.56253	0.462156	0.511572	0.89414	0.430296	0.555732	0.123234	0.12362	0.410802	0.140346	0.964813
LECT2	0.538994	0.441478	0.0258024	0.710563	0.76744	0.102482	0.17896	0.670905	0.134637	0.160532	0.0311246	0.0515422	0.12297	0.0510267	0.123016	0.581134	0.591959	0.559894	0.295124	0.633436	0.0968986	0.365381	0.606587	0.197496	0.103111	0.378535	0.116263	0.118329	0.374718	0.377296	0.414267	0.499565	0.431766	0.333839	0.602228	0.0534746	0.263301	0.0739393	0.0771181	0.758492	0.895185	0.946043	0.449133	0.00648341	0.030092	0.571075	0.0420288	0.0454012	0.61693
HAO1	0.472015	0.333376	0.149533	0.218784	0.42636	0.298562	0.0214224	0.905399	0.46361	0.0897106	0.576538	0.637275	0.894027	0.403349	0.22931	0.524159	0.381228	0.265529	0.0550721	0.953711	0.147602	0.426478	0.273096	0.0303863	0.471066	0.407001	0.795724	0.629378	0.464882	0.645429	0.100869	0.828504	0.73787	0.424978	0.880979	0.585863	0.769154	0.222418	0.800598	0.143782	0.0363151	0.866754	0.675719	0.29984	0.806656	0.0142018	0.700958	0.572859	0.127331
ABCC6	0.487637	0.338083	0.169973	0.200361	0.423522	0.321371	0.0230231	0.906212	0.488486	0.0906676	0.629973	0.691305	0.940317	0.4274	0.250738	0.48849	0.354937	0.270743	0.0583791	0.939727	0.176148	0.426671	0.271068	0.0316384	0.488284	0.408797	0.746177	0.670615	0.454734	0.646198	0.100609	0.786022	0.756547	0.438652	0.841137	0.642996	0.805701	0.25317	0.724839	0.131717	0.0310839	0.845928	0.638279	0.354087	0.857776	0.0100734	0.768703	0.616362	0.106113
PI15	0.995349	0.3216	0.506633	0.153135	0.788608	0.478801	0.470858	0.0338624	0.447615	0.932706	0.558461	0.186656	0.2221	0.116999	0.167101	0.0381763	0.820936	0.707969	0.368221	0.894561	0.396292	0.678894	0.97363	0.519864	0.573098	0.907652	0.39023	0.0114931	0.86933	0.0219729	0.130029	0.802953	0.0959579	0.970523	0.327695	0.134197	0.0120157	0.271553	0.129945	0.854887	0.650412	0.710145	0.01114	0.484663	0.0162251	0.877014	0.32525	0.250314	0.291889
FGG	0.806109	0.423399	0.342588	0.747235	0.754458	0.012627	0.581313	0.272072	0.00837233	0.635399	0.109214	0.253273	0.0438181	0.131332	0.76577	0.961466	0.828906	0.487665	0.907918	0.0378824	0.796634	0.588074	0.675421	0.896682	0.568513	0.825546	0.0214765	0.468683	0.977421	0.286359	0.612756	0.0602212	0.815285	0.232241	0.281402	0.0834991	0.313671	0.912817	0.167774	0.368282	0.278877	0.147352	0.938147	0.378937	0.610292	0.591965	0.0340714	0.265371	0.0451951
TGFBI	0.388826	0.0977936	0.0723131	0.0488802	0.202519	0.117737	0.276313	0.020844	0.0922367	0.141408	0.53209	0.206944	0.0414019	0.0345936	0.0491608	0.357248	0.250966	0.238639	0.129497	0.498154	0.662255	0.0657419	0.274458	0.11783	0.0789369	0.173218	0.148652	0.00309598	0.171826	0.0638791	0.0284716	0.661684	0.0192837	0.186269	0.152926	0.044016	0.0758925	0.554284	0.146623	0.501422	0.642524	0.45334	0.152661	0.263867	0.0944669	0.259058	0.139668	0.0349109	0.54171
EPHB6	0.590316	0.750385	0.59118	0.101157	0.821809	0.183425	0.0686524	0.0480454	0.246444	0.623744	0.786973	0.568277	0.41661	0.0971169	0.373164	0.553199	0.879032	0.941463	0.110766	0.554615	0.50468	0.729548	0.742971	0.20037	0.805308	0.865162	0.639734	0.135869	0.955961	0.0779989	0.0783138	0.665196	0.40568	0.977094	0.721914	0.155837	0.00291421	0.420689	0.568446	0.756862	0.73737	0.878089	0.356655	0.788461	0.0347372	0.375272	0.402851	0.312809	0.524065
C5AR1	0.0511278	0.0241195	0.00857579	0.437339	0.169924	0.262137	0.654638	0.366319	0.218331	0.0777129	0.401345	0.150842	0.0284636	0.155462	0.00292881	0.34495	0.289651	0.0471616	0.177487	0.9335	0.554078	0.0303788	0.0778819	0.116728	0.0075915	0.0425438	0.0682216	0.00549598	0.0730795	0.129515	0.094808	0.54426	0.00267803	0.0793632	0.305656	0.0241863	0.350536	0.440129	0.0165872	0.439187	0.492337	0.67172	0.179062	0.0135545	0.111563	0.555748	0.0394018	0.00169576	0.54258
FGA	0.572657	0.464472	0.0321902	0.725209	0.799431	0.111497	0.21679	0.653925	0.136674	0.175237	0.0321246	0.0528937	0.115541	0.0491253	0.14087	0.559475	0.572462	0.606011	0.345751	0.59074	0.129586	0.365066	0.642285	0.23276	0.0972105	0.383262	0.0997952	0.120005	0.35873	0.36095	0.458149	0.499974	0.432448	0.348059	0.612105	0.0582581	0.265615	0.0915981	0.0732264	0.680181	0.978304	0.95854	0.429882	0.010287	0.0252426	0.615508	0.0451396	0.0445259	0.560074
FGB	0.911059	0.627222	0.336621	0.749425	0.47536	0.0351682	0.929748	0.2064	0.0151844	0.662797	0.202327	0.275736	0.0178443	0.19652	0.86325	0.87268	0.766661	0.710777	0.799146	0.0642394	0.93617	0.414294	0.921356	0.780316	0.461068	0.617345	0.00891283	0.353686	0.863003	0.289334	0.636466	0.0273416	0.871554	0.138023	0.580866	0.0800265	0.404955	0.653178	0.102147	0.570821	0.324762	0.0737088	0.761731	0.406407	0.786267	0.463212	0.0326091	0.22451	0.0230242
PEPD	0.230858	0.117747	0.0108631	0.156732	0.0480157	0.0483709	0.481529	0.0358954	0.0182825	0.0872149	0.156505	0.0444407	0.000828361	0.0114261	0.0947716	0.35226	0.149723	0.238244	0.416656	0.266013	0.645614	0.0193073	0.169361	0.297455	0.010241	0.0480952	0.0118761	0.00281218	0.0613885	0.341838	0.206705	0.134006	0.0432332	0.0284654	0.252617	0.0294155	0.246394	0.619525	0.0427758	0.526044	0.668985	0.146902	0.165782	0.104624	0.217901	0.428714	0.0444934	0.0175785	0.387227
SERPINA10	0.415287	0.287028	0.033047	0.293195	0.471047	0.13244	0.0144587	0.793623	0.236947	0.0506668	0.208189	0.261328	0.478245	0.153343	0.106042	0.819854	0.389516	0.273418	0.0513392	0.821717	0.0550975	0.326534	0.297318	0.0220834	0.225789	0.31752	0.681731	0.315492	0.361233	0.479837	0.110322	0.894769	0.559405	0.306954	0.903187	0.235075	0.490708	0.0804275	0.624366	0.367214	0.13473	0.931741	0.992422	0.059371	0.327609	0.0522281	0.279872	0.22543	0.402433
SERPINA1	0.479483	0.453582	0.0282442	0.838631	0.748338	0.112391	0.167358	0.759632	0.164926	0.212649	0.0338413	0.0521918	0.149098	0.0900163	0.11092	0.560017	0.82323	0.503625	0.250511	0.839829	0.0413655	0.456503	0.601174	0.198298	0.171966	0.450532	0.159971	0.126658	0.542462	0.504999	0.405464	0.44331	0.456786	0.347857	0.514813	0.0428569	0.262777	0.0489267	0.062678	0.880884	0.826274	0.852963	0.454843	0.00145435	0.0552755	0.670689	0.0307979	0.0611807	0.635001
SERPINA11	0.951213	0.681743	0.938716	0.160799	0.587891	0.922736	0.360822	0.985565	0.83472	0.416416	0.364456	0.350926	0.35836	0.848405	0.968064	0.193414	0.23324	0.627588	0.4465	0.813034	0.744287	0.682656	0.48914	0.344234	0.950941	0.693182	0.186311	0.524067	0.547165	0.84805	0.363068	0.304116	0.834822	0.918064	0.369251	0.329168	0.55089	0.74408	0.0398683	0.129064	0.0664663	0.620575	0.261709	0.329999	0.320448	0.0163999	0.203016	0.492811	0.0190381
KCNC1	0.222173	0.550581	0.484973	0.553546	0.99078	0.70848	0.679291	0.631361	0.91585	0.483957	0.424144	0.560769	0.792594	0.621325	0.192493	0.639145	0.801393	0.216056	0.0555636	0.441446	0.787298	0.591438	0.468705	0.133886	0.83802	0.72052	0.958996	0.654137	0.837345	0.888856	0.233769	0.47897	0.315479	0.558528	0.824273	0.199224	0.619547	0.978144	0.456877	0.419927	0.550595	0.699732	0.736689	0.230997	0.794002	0.992388	0.248969	0.227372	0.842821
HPN	0.954303	0.532194	0.346596	0.446762	0.682704	0.0471393	0.547522	0.583831	0.0655859	0.606733	0.327788	0.495245	0.0922133	0.284926	0.784687	0.956589	0.911929	0.673684	0.571174	0.234917	0.7515	0.668557	0.624425	0.66827	0.591741	0.973153	0.0467765	0.407712	0.796696	0.709391	0.9557	0.474697	0.864471	0.41864	0.157252	0.0162796	0.148898	0.914042	0.0710662	0.227272	0.201339	0.662375	0.929217	0.179537	0.199219	0.454906	0.00605473	0.0783088	0.0196041
COL3A1	0.52824	0.131969	0.332759	0.035706	0.513736	0.456969	0.212923	0.190326	0.496573	0.171105	0.656362	0.936415	0.524291	0.316706	0.0932425	0.884241	0.233575	0.23004	0.0362804	0.821976	0.958755	0.180072	0.317665	0.0357073	0.308122	0.349919	0.860076	0.155656	0.281257	0.0260285	0.00436518	0.38898	0.076013	0.541175	0.123283	0.34029	0.219212	0.759532	0.83037	0.318649	0.335228	0.836386	0.582164	0.748675	0.259647	0.0666435	0.675208	0.220367	0.733608
HAMP	0.483233	0.667424	0.300209	0.823765	0.735613	0.457362	0.319678	0.856756	0.632855	0.681199	0.373146	0.383852	0.665022	0.721086	0.322068	0.787168	0.494569	0.472725	0.29116	0.481989	0.0441977	0.97737	0.674156	0.398013	0.894708	0.897669	0.827686	0.506783	0.711634	0.835828	0.517652	0.561082	0.779445	0.635785	0.510493	0.270503	0.578585	0.161838	0.350501	0.556055	0.534123	0.681343	0.794143	0.0734242	0.687512	0.939111	0.244001	0.527555	0.961543
SAA4	0.416818	0.286343	0.0348926	0.284976	0.467181	0.135963	0.0139806	0.795579	0.242294	0.0500143	0.218515	0.272704	0.492104	0.158266	0.108726	0.804188	0.382329	0.271557	0.0503648	0.821834	0.0577911	0.326407	0.293796	0.0213909	0.230432	0.317388	0.701114	0.325003	0.359674	0.48171	0.107884	0.90858	0.564695	0.309162	0.914974	0.246028	0.500431	0.0840106	0.64861	0.354558	0.127122	0.926199	0.992236	0.0649528	0.34133	0.0476562	0.293847	0.234657	0.384585
RNASE6	0.00119591	0.00529987	0.00911781	0.414927	0.0078429	0.446259	0.990758	0.61985	0.333315	0.0177053	0.686764	0.378612	0.0860588	0.413782	0.0239127	0.821712	0.0427223	0.00303528	0.33967	0.827096	0.95983	0.000658458	0.00035991	0.160765	0.000718077	4.2057e-05	0.167708	0.0946726	0.00181507	0.451389	0.176414	0.467344	0.00942422	0.00673087	0.0978588	0.230734	0.838544	0.971893	0.197435	0.0568099	0.0871395	0.215902	0.575026	0.0850732	0.825236	0.293882	0.223092	0.0377146	0.844603
CCR5	0.328262	0.168222	0.0781314	0.317717	0.0869957	0.19787	0.901571	0.0403254	0.0987005	0.440435	0.122237	0.0144406	0.00307894	0.0421261	0.16299	0.0667293	0.554643	0.370503	0.826582	0.579138	0.551283	0.136691	0.338504	0.764495	0.0692632	0.171629	0.0149415	0.0016452	0.220554	0.379161	0.439846	0.0465716	0.053315	0.132456	0.264935	0.059422	0.244039	0.527875	0.0083856	0.763498	0.944226	0.331514	0.0230755	0.131809	0.208899	0.997218	0.0703229	0.0752147	0.186773
CCR2	0.201362	0.0428947	0.10242	0.20114	0.0371971	0.485106	0.992998	0.0886512	0.318884	0.486931	0.205554	0.0206248	0.0414764	0.115053	0.0895129	0.0326152	0.590073	0.174458	0.806329	0.962333	0.445874	0.159824	0.175514	0.728975	0.0830272	0.135185	0.115159	0.00308875	0.169105	0.238663	0.31074	0.0913987	0.0250382	0.198995	0.0872913	0.194259	0.432957	0.393379	0.0404011	0.400707	0.644141	0.509341	0.00977516	0.161839	0.327598	0.809686	0.239864	0.179297	0.533492
BDKRB1	0.450738	0.153836	0.26256	0.120019	0.67461	0.366248	0.143637	0.289579	0.466703	0.163306	0.666638	0.950867	0.488943	0.364573	0.0431855	0.917665	0.412366	0.19188	0.00357651	0.999666	0.727683	0.221628	0.352823	0.0089609	0.357983	0.427491	0.819891	0.129483	0.451105	0.0362232	0.00094458	0.33605	0.0640246	0.53842	0.293299	0.161461	0.126465	0.608272	0.609794	0.359913	0.377942	0.944491	0.619781	0.462147	0.166755	0.124749	0.41136	0.119504	0.886852
INSC	0.413841	0.331507	0.0173153	0.506204	0.57386	0.0966139	0.0420502	0.768779	0.172241	0.0877679	0.0793763	0.112114	0.269916	0.0968889	0.082492	0.869979	0.569316	0.341997	0.0967951	0.830734	0.0291656	0.359794	0.401045	0.0576181	0.172795	0.350919	0.367723	0.184592	0.422787	0.471172	0.195161	0.647124	0.484637	0.29542	0.690465	0.0947135	0.344141	0.0431601	0.252607	0.67418	0.366815	0.959152	0.70859	0.00804305	0.140665	0.230058	0.0983754	0.106922	0.827796
DNAH9	0.900142	0.648755	0.989111	0.162951	0.561269	0.9753	0.304903	0.998714	0.867282	0.38732	0.406543	0.391159	0.375815	0.872572	0.962324	0.198095	0.257117	0.576545	0.382774	0.860877	0.863413	0.677105	0.458275	0.29602	0.960127	0.680761	0.188756	0.560972	0.566217	0.861377	0.323257	0.327108	0.85323	0.882661	0.399325	0.379222	0.581931	0.833397	0.0517743	0.106096	0.0500437	0.644063	0.267622	0.409317	0.335008	0.0136177	0.243872	0.526594	0.0162624
HABP2	0.556631	0.356214	0.249744	0.137997	0.422126	0.401883	0.0320617	0.890479	0.564966	0.0904227	0.812391	0.875555	0.920871	0.491366	0.336639	0.380103	0.247827	0.302179	0.0781772	0.850756	0.319896	0.412654	0.270253	0.0385618	0.522156	0.40435	0.61198	0.807737	0.393381	0.621399	0.104745	0.640806	0.813633	0.485397	0.69636	0.849713	0.927853	0.38603	0.488968	0.110464	0.0212625	0.761602	0.526063	0.581755	0.996479	0.00187536	0.991465	0.754825	0.0560153
XG	0.281597	0.114893	0.124192	0.0935138	0.157145	0.211708	0.547361	0.0765581	0.149517	0.0833117	0.962362	0.573461	0.0818661	0.152227	0.120911	0.773398	0.0660012	0.197333	0.208326	0.338319	0.684966	0.0184435	0.165726	0.145351	0.0534821	0.0800751	0.193083	0.055024	0.0665507	0.155921	0.0700045	0.868203	0.0270905	0.111774	0.0871918	0.149425	0.324645	0.837009	0.352987	0.371065	0.515424	0.221348	0.45511	0.521292	0.359087	0.218271	0.282534	0.0549728	0.69358
C7orf57	0.951213	0.681743	0.938716	0.160799	0.587891	0.922736	0.360822	0.985565	0.83472	0.416416	0.364456	0.350926	0.35836	0.848405	0.968064	0.193414	0.23324	0.627588	0.4465	0.813034	0.744287	0.682656	0.48914	0.344234	0.950941	0.693182	0.186311	0.524067	0.547165	0.84805	0.363068	0.304116	0.834822	0.918064	0.369251	0.329168	0.55089	0.74408	0.0398683	0.129064	0.0664663	0.620575	0.261709	0.329999	0.320448	0.0163999	0.203016	0.492811	0.0190381
THOC7	0.151973	0.0147822	0.22958	0.150421	0.193664	0.755293	0.508708	0.276613	0.778944	0.450848	0.96956	0.419376	0.408381	0.501878	0.00897303	0.202946	0.8961	0.0367477	0.0832479	0.305337	0.329668	0.298843	0.140897	0.139461	0.375819	0.329928	0.815972	0.0278188	0.496356	0.0679578	0.00778882	0.964563	0.00770991	0.491569	0.0737478	0.226293	0.279	0.320845	0.266082	0.0908449	0.220267	0.827154	0.110415	0.237914	0.357822	0.408243	0.44813	0.246192	0.862275
HBEGF	0.690868	0.472574	0.348422	0.852461	0.759015	0.437094	0.990706	0.191588	0.365215	0.969971	0.255934	0.0758657	0.0654277	0.196047	0.217828	0.0241293	0.590776	0.729447	0.762438	0.882941	0.391762	0.664378	0.960353	0.91364	0.420893	0.78265	0.08003	0.0162993	0.919606	0.277806	0.571015	0.280978	0.131296	0.668416	0.789806	0.0439211	0.0758537	0.343255	0.00149131	0.566494	0.349817	0.820514	0.0124439	0.133226	0.0371103	0.387682	0.0621259	0.116156	0.0407295
SLC6A11	0.834873	0.405658	0.503603	0.788732	0.771875	0.0207393	0.560228	0.239697	0.0204616	0.674174	0.45007	0.6153	0.0944671	0.290464	0.748561	0.725731	0.885434	0.572038	0.81841	0.0619832	0.94476	0.585795	0.701888	0.944169	0.803463	0.92216	0.0889639	0.559428	0.783704	0.25712	0.839588	0.192694	0.897784	0.255527	0.398081	0.0901815	0.271052	0.594927	0.30346	0.593497	0.364059	0.127926	0.852845	0.605583	0.846401	0.653536	0.0618127	0.316554	0.0620564
LMX1A	0.857006	0.595764	0.660185	0.119113	0.774428	0.267902	0.335215	0.0121448	0.264275	0.738763	0.940242	0.647921	0.26715	0.182716	0.39611	0.411289	0.838049	0.858097	0.232878	0.578174	0.917392	0.525073	0.976809	0.383996	0.739937	0.920517	0.490918	0.0848273	0.930266	0.144531	0.107441	0.944278	0.199759	0.781762	0.338893	0.157443	0.0158695	0.861233	0.433425	0.969781	0.725767	0.755749	0.236585	0.944668	0.158518	0.61447	0.398003	0.304077	0.329352
SFTPC	0.725468	0.556135	0.731944	0.210038	0.49585	0.833025	0.168536	0.953556	0.995873	0.322519	0.615947	0.594141	0.482112	0.969874	0.717125	0.256473	0.39907	0.430011	0.217698	0.953597	0.691308	0.679107	0.384341	0.180134	0.996288	0.657835	0.237721	0.732573	0.666976	0.919783	0.228631	0.459821	0.930862	0.764258	0.556981	0.628952	0.728348	0.824204	0.152665	0.065218	0.0247287	0.756309	0.330725	0.794197	0.431452	0.0165451	0.473206	0.68866	0.0204931
TNFSF9	0.867654	0.301698	0.568088	0.422382	0.754488	0.85404	0.982812	0.159001	0.742135	0.75541	0.32742	0.0710765	0.253669	0.222515	0.215169	0.000869067	0.559483	0.71569	0.877872	0.560391	0.310903	0.876452	0.964905	0.99475	0.554463	0.908555	0.335245	0.0225171	0.870386	0.0627935	0.442961	0.466403	0.130315	0.927359	0.399619	0.261596	0.112866	0.184829	0.0525822	0.70884	0.529156	0.5259	0.000164401	0.34818	0.03549	0.641351	0.385563	0.372471	0.251982
CPB2	0.514208	0.276882	0.0742657	0.117791	0.437992	0.191848	0.0134868	0.730381	0.29332	0.0256327	0.404268	0.480496	0.664479	0.174916	0.181367	0.561257	0.141716	0.30184	0.0628019	0.604035	0.220274	0.250858	0.25849	0.0161012	0.211572	0.259855	0.901465	0.476427	0.203366	0.379609	0.0875266	0.810628	0.623025	0.33942	0.800981	0.491081	0.663975	0.211852	0.91059	0.282742	0.0690288	0.746236	0.774381	0.268547	0.480627	0.00201195	0.60503	0.357414	0.184035
TUBB4A	0.0927488	0.0211049	0.124908	0.212156	0.0764906	0.591454	0.872779	0.199797	0.415044	0.179261	0.901219	0.402356	0.0881643	0.30994	0.0574143	0.360538	0.140533	0.0700891	0.467588	0.809269	0.720339	0.0217797	0.0649575	0.341567	0.0245194	0.0355852	0.177282	0.0321822	0.0317257	0.119857	0.147175	0.646781	0.00190571	0.12357	0.024225	0.242265	0.62599	0.943267	0.17349	0.285631	0.466598	0.376436	0.1865	0.356291	0.422095	0.49642	0.343913	0.0692564	0.696968
AOC1	0.853235	0.97199	0.404201	0.625524	0.468214	0.127191	0.84138	0.0240044	0.0645379	0.943347	0.061544	0.0248367	0.0187694	0.0438062	0.809724	0.0939616	0.854526	0.713252	0.720751	0.311238	0.519554	0.657339	0.783983	0.642249	0.507415	0.825799	0.0227144	0.0601289	0.920786	0.910158	0.950351	0.0152942	0.54014	0.449307	0.920798	0.0990838	0.11255	0.615501	0.0335937	0.471732	0.241055	0.382899	0.0642739	0.402369	0.241428	0.485095	0.0923448	0.318283	0.0239775
SLC25A47	0.606132	0.415746	0.0320578	0.502895	0.747435	0.109436	0.165683	0.596358	0.129362	0.102591	0.054385	0.0855822	0.146607	0.0354921	0.151687	0.710712	0.332709	0.589927	0.311945	0.445771	0.210447	0.276919	0.569451	0.169748	0.0662143	0.305011	0.135964	0.148383	0.221778	0.27284	0.378055	0.646693	0.436715	0.329487	0.77343	0.105573	0.313985	0.130122	0.173104	0.764976	0.827977	0.920354	0.535455	0.0379087	0.0331623	0.361833	0.10043	0.0552105	0.762407
PCDHA13	0.90129	0.461487	0.361417	0.0520516	0.442155	0.111907	0.215936	0.00843179	0.102792	0.31938	0.931501	0.603685	0.161016	0.0941757	0.341324	0.719276	0.348052	0.655952	0.168816	0.276275	0.98531	0.215233	0.673401	0.213553	0.404689	0.512971	0.357903	0.0839237	0.501926	0.214109	0.0736931	0.926905	0.182038	0.389711	0.265625	0.137129	0.0548412	0.982898	0.520082	0.677591	0.902816	0.354117	0.435461	0.840297	0.264753	0.273515	0.335728	0.198183	0.5219
RGS4	0.477948	0.844498	0.873985	0.132415	0.958181	0.348177	0.455732	0.0047354	0.301164	0.885629	0.68328	0.378103	0.283442	0.107579	0.675325	0.178027	0.936026	0.703059	0.640056	0.512876	0.798836	0.83827	0.602293	0.827439	0.882477	0.803935	0.426848	0.101131	0.921148	0.153647	0.343075	0.776712	0.397269	0.920975	0.456472	0.274323	0.0137164	0.68199	0.406867	0.569829	0.36214	0.876183	0.0989554	0.901793	0.095468	0.884928	0.522696	0.513353	0.211241
PCDHGB7	0.506817	0.221208	0.103606	0.165574	0.641153	0.123909	0.15481	0.167195	0.148073	0.0952603	0.747235	0.498024	0.14272	0.0931507	0.0544712	0.763878	0.264176	0.33001	0.0339587	0.508339	0.706419	0.122102	0.431257	0.0293009	0.128725	0.298231	0.264548	0.047409	0.27163	0.0521405	0.0239683	0.744471	0.0696053	0.322346	0.479437	0.0420613	0.0698413	0.547775	0.256566	0.766316	0.722999	0.775998	0.462378	0.245591	0.0405591	0.219857	0.135811	0.020494	0.628734
C5	0.474675	0.342953	0.0136241	0.482077	0.633312	0.0818181	0.0665482	0.675268	0.128833	0.0742187	0.0505544	0.0797004	0.184985	0.0481229	0.0895363	0.788988	0.432852	0.422753	0.15248	0.632481	0.0676886	0.295482	0.450619	0.0790463	0.0963555	0.304174	0.224449	0.144037	0.299127	0.351173	0.243655	0.631271	0.440108	0.284731	0.715134	0.0795288	0.305276	0.0574815	0.190555	0.918249	0.536825	0.985659	0.612702	0.00987737	0.0631573	0.258759	0.0794101	0.0628216	0.988747
CAMK4	0.587728	0.990249	0.795704	0.25333	0.637199	0.224231	0.0702921	0.157897	0.347805	0.664704	0.762057	0.92223	0.660347	0.326626	0.512469	0.992569	0.999815	0.916257	0.0543372	0.623305	0.695906	0.848309	0.67795	0.154147	0.885424	0.699095	0.922061	0.357036	0.673518	0.238255	0.088012	0.394292	0.572855	0.918459	0.941625	0.202001	0.013642	0.703933	0.834938	0.87375	0.807764	0.860803	0.783747	0.962066	0.156252	0.416514	0.472521	0.411881	0.615098
LYVE1	0.674024	0.343158	0.225479	0.323928	0.25176	0.236037	0.841999	0.0163039	0.137824	0.795459	0.132168	0.0162785	0.0141897	0.0423851	0.280372	0.0224622	0.942928	0.676083	0.905594	0.658277	0.454537	0.374643	0.707397	0.960989	0.249367	0.477744	0.0388435	0.00288315	0.541675	0.33686	0.50447	0.0674865	0.116962	0.364054	0.376103	0.0708006	0.0995863	0.43791	0.0123183	0.915946	0.595369	0.544244	0.00593364	0.244729	0.126071	0.779632	0.10304	0.161989	0.0988565
APOA2	0.503235	0.469188	0.0303582	0.853871	0.776338	0.11407	0.194918	0.739174	0.15898	0.221626	0.0302146	0.0477368	0.132752	0.0809333	0.119518	0.530609	0.802792	0.54021	0.287722	0.7938	0.0549872	0.449617	0.630993	0.22471	0.156623	0.44875	0.13233	0.120332	0.519389	0.480801	0.440859	0.4342	0.44964	0.353672	0.51506	0.0414162	0.25571	0.056339	0.0528527	0.797989	0.906723	0.861341	0.426845	0.00190688	0.043034	0.714932	0.0285871	0.0542681	0.570402
COL1A2	0.546793	0.115424	0.342339	0.0329496	0.498666	0.493079	0.282717	0.139785	0.502852	0.229205	0.744662	0.794164	0.449044	0.270748	0.0862406	0.660775	0.280337	0.24842	0.0671957	0.858913	0.939381	0.192575	0.345704	0.0681713	0.287636	0.359864	0.759174	0.102258	0.27832	0.013381	0.00755843	0.484439	0.0528313	0.573367	0.0953495	0.317489	0.182454	0.709588	0.688662	0.390068	0.436273	0.872563	0.396672	0.727023	0.194212	0.114361	0.644617	0.208107	0.875781
ITGBL1	0.735723	0.474425	0.872698	0.0518283	0.889402	0.66206	0.475221	0.0483351	0.614373	0.833339	0.868043	0.706065	0.564806	0.249156	0.449445	0.338717	0.684517	0.892665	0.421974	0.749313	0.971083	0.63944	0.984839	0.500503	0.717912	0.927696	0.7957	0.171734	0.703778	0.029027	0.143753	0.652277	0.245225	0.887442	0.180737	0.533893	0.0949941	0.76184	0.766255	0.975256	0.841671	0.973809	0.202454	0.756815	0.151304	0.439493	0.909551	0.558985	0.701296
DEPDC1	0.711359	0.785954	0.239419	0.551727	0.451529	0.0983903	0.783903	0.438537	0.0447322	0.610268	0.0835665	0.150765	0.0154079	0.214137	0.966246	0.726574	0.673924	0.823939	0.542063	0.112896	0.989358	0.370471	0.922453	0.647542	0.252045	0.437885	0.00145981	0.365257	0.587624	0.335257	0.432189	0.0109675	0.830825	0.121011	0.5434	0.125291	0.693776	0.811567	0.049683	0.475755	0.343336	0.124489	0.661282	0.231088	0.705301	0.366476	0.0341232	0.185948	0.0357399
INHBE	0.951213	0.681743	0.938716	0.160799	0.587891	0.922736	0.360822	0.985565	0.83472	0.416416	0.364456	0.350926	0.35836	0.848405	0.968064	0.193414	0.23324	0.627588	0.4465	0.813034	0.744287	0.682656	0.48914	0.344234	0.950941	0.693182	0.186311	0.524067	0.547165	0.84805	0.363068	0.304116	0.834822	0.918064	0.369251	0.329168	0.55089	0.74408	0.0398683	0.129064	0.0664663	0.620575	0.261709	0.329999	0.320448	0.0163999	0.203016	0.492811	0.0190381
SLC22A1	0.577396	0.313759	0.16712	0.0888447	0.42977	0.305222	0.0235615	0.773788	0.426141	0.0416755	0.656409	0.73486	0.902107	0.302234	0.285279	0.414993	0.120964	0.323387	0.0814082	0.627234	0.365509	0.29255	0.260149	0.025678	0.322779	0.302157	0.824354	0.677419	0.227148	0.441307	0.0946346	0.646965	0.726419	0.417232	0.662329	0.751466	0.838507	0.358396	0.582538	0.191422	0.0380122	0.69225	0.601452	0.522649	0.748403	0.000149866	0.908526	0.571976	0.0860391
CREB3L3	0.115606	0.636209	0.0797038	0.500088	0.270761	0.131981	0.761338	0.784156	0.0871975	0.14139	0.592268	0.612472	0.0207154	0.536671	0.439442	0.711872	0.265402	0.36847	0.705681	0.24472	0.577674	0.0490582	0.262422	0.571975	0.0670175	0.0884342	0.00952284	0.347539	0.236683	0.514684	0.955051	0.236713	0.285196	0.00952765	0.904721	0.0534146	0.933426	0.44522	0.0629611	0.803321	0.989281	0.095884	0.893379	0.107577	0.898759	0.724057	0.0129056	0.0189983	0.161485
PON1	0.425868	0.470552	0.0533008	0.914013	0.69275	0.163388	0.145348	0.897295	0.260614	0.287771	0.082649	0.105165	0.274217	0.213079	0.125179	0.653362	0.933635	0.423067	0.189476	0.879056	0.0166641	0.593288	0.563322	0.188063	0.343754	0.558089	0.3455	0.200774	0.781086	0.71469	0.365411	0.468977	0.538407	0.394418	0.492403	0.0719196	0.332452	0.0466658	0.121636	0.822309	0.613193	0.779583	0.574199	0.00294169	0.180253	0.672845	0.0579931	0.143639	0.840557
GPR182	0.478089	0.5409	0.336365	0.704038	0.560907	0.501569	0.143981	0.867601	0.715311	0.434963	0.664305	0.68516	0.993214	0.797157	0.348764	0.76677	0.894429	0.347953	0.148883	0.57122	0.0911979	0.829616	0.462515	0.190402	0.920386	0.759032	0.722257	0.730501	0.933731	0.910479	0.2826	0.917854	0.861155	0.611346	0.820441	0.555146	0.793844	0.245034	0.936812	0.1983	0.145818	0.86531	0.812158	0.252106	0.95921	0.323427	0.600629	0.769395	0.345552
APOH	0.99529	0.540981	0.318153	0.765216	0.623056	0.0140621	0.721419	0.222933	0.00689003	0.55135	0.226981	0.352332	0.0228924	0.168035	0.866889	0.925792	0.690599	0.645287	0.98593	0.0327785	0.933482	0.408264	0.842726	0.967567	0.46757	0.662718	0.0113553	0.39775	0.887168	0.322444	0.722039	0.0773341	0.943737	0.148329	0.45017	0.0579724	0.323001	0.661904	0.13661	0.490132	0.313052	0.0852721	0.934383	0.406573	0.675035	0.582567	0.0238813	0.180128	0.0270375
KLK4	0.436939	0.325648	0.013619	0.468539	0.589326	0.0851471	0.0453641	0.71912	0.146414	0.0716363	0.0650134	0.0969049	0.230234	0.0672994	0.0815703	0.851101	0.477362	0.368034	0.111347	0.724446	0.043606	0.316076	0.409308	0.0585202	0.127346	0.316366	0.302988	0.164305	0.345479	0.40189	0.202825	0.653005	0.460572	0.282847	0.715216	0.088656	0.326813	0.0477559	0.234515	0.764195	0.41719	0.995552	0.676516	0.00894015	0.100144	0.216447	0.0921181	0.0833461	0.88082
NXPH2	0.453771	0.581833	0.245314	0.981795	0.655679	0.405878	0.206595	0.886048	0.590145	0.521932	0.389641	0.408103	0.70315	0.656495	0.277684	0.916834	0.662442	0.400966	0.202	0.539849	0.0389246	0.872425	0.568837	0.269027	0.819427	0.798095	0.908592	0.513565	0.841658	0.913577	0.390756	0.650066	0.765617	0.578616	0.591732	0.296571	0.598383	0.145806	0.46538	0.424075	0.363279	0.744209	0.893206	0.0810524	0.712107	0.663502	0.288627	0.524919	0.746886
HSD17B6	0.454972	0.272896	0.0209296	0.237536	0.495855	0.102975	0.0164729	0.697708	0.175796	0.02876	0.155991	0.209648	0.374955	0.0810218	0.0999022	0.858572	0.248192	0.314678	0.0686936	0.623319	0.0925724	0.246577	0.30785	0.0215201	0.127971	0.253191	0.519372	0.259448	0.229515	0.348352	0.11816	0.901851	0.507231	0.278431	0.94814	0.209395	0.44667	0.088703	0.564384	0.509868	0.194564	0.864463	0.923878	0.0606981	0.203979	0.0405709	0.251333	0.154118	0.485787
HPGD	0.893134	0.538555	0.544762	0.129926	0.410183	0.306505	0.779745	0.0012819	0.185903	0.88857	0.42906	0.159809	0.0811863	0.0606755	0.562785	0.100745	0.717477	0.99228	0.938713	0.390964	0.930561	0.443723	0.960011	0.997393	0.431455	0.669188	0.15016	0.0359856	0.580762	0.241193	0.466414	0.294881	0.215859	0.593211	0.231615	0.236547	0.0872584	0.81417	0.200444	0.813389	0.506994	0.445495	0.042553	0.856157	0.190084	0.942358	0.382556	0.356021	0.170089
IGSF10	0.628147	0.81536	0.718837	0.110084	0.86858	0.214108	0.0763913	0.0683473	0.295606	0.60044	0.855005	0.914084	0.556136	0.215465	0.469068	0.855397	0.811109	0.992809	0.0787781	0.538524	0.729017	0.701657	0.807481	0.169919	0.952357	0.859887	0.842999	0.252857	0.893936	0.160876	0.0659015	0.51101	0.460065	0.983989	0.657358	0.228316	0.0147762	0.695594	0.830952	0.990431	0.901947	0.973914	0.614499	0.980786	0.153738	0.306274	0.531114	0.412028	0.669535
P2RY12	0.0178155	0.00602467	0.00878153	0.17112	0.00170884	0.326373	0.796133	0.296515	0.213577	0.0276584	0.460322	0.192679	0.0527006	0.189678	0.0368748	0.599658	0.0397495	0.0160344	0.401632	0.658011	0.870718	0.0015201	0.00339429	0.20649	0.00111089	0.000534065	0.139876	0.0425204	0.00175974	0.359096	0.151463	0.30223	0.0136657	0.0104412	0.0537327	0.23154	0.939722	0.801463	0.206506	0.0713453	0.110932	0.15701	0.368947	0.129082	0.706346	0.206475	0.253947	0.0627071	0.867161
GPR87	0.0338989	0.215197	0.0175304	0.943228	0.0540671	0.158914	0.822436	0.50817	0.0895719	0.113341	0.344173	0.224193	0.00407332	0.316408	0.171352	0.738478	0.248083	0.138571	0.667061	0.45648	0.96845	0.018064	0.0870843	0.51264	0.0147384	0.0223126	0.00597892	0.0934599	0.0999963	0.883096	0.650298	0.0893823	0.0843147	0.00256958	0.597098	0.042665	0.856156	0.847824	0.01686	0.45396	0.675738	0.111356	0.55194	0.0353825	0.747329	0.936706	0.0141589	0.0131976	0.275293
CD86	0.00273689	0.000708403	0.0112933	0.269793	0.0174102	0.531467	0.797278	0.640644	0.443314	0.0157883	0.735926	0.390959	0.162216	0.402325	0.00772993	0.771822	0.0499579	0.000970639	0.218671	0.986536	0.862885	0.00293794	0.000294258	0.086436	0.00202047	0.000569014	0.305394	0.0870039	0.0022651	0.245623	0.0816811	0.688593	0.00636299	0.0281265	0.0697963	0.282427	0.918704	0.742744	0.279185	0.0392924	0.0437128	0.383886	0.525464	0.0916729	0.683898	0.164006	0.321003	0.0532352	0.609837
SERPINC1	0.958601	0.544232	0.345451	0.711576	0.59939	0.0216184	0.821965	0.242665	0.0106745	0.571761	0.281998	0.407025	0.0248329	0.214597	0.843624	0.901461	0.686996	0.671063	0.946293	0.0370919	0.833325	0.393867	0.873341	0.924837	0.475395	0.643137	0.0121865	0.424915	0.882085	0.288489	0.689548	0.0789183	0.921916	0.139294	0.483403	0.0669525	0.372184	0.565585	0.141177	0.521692	0.314634	0.0735993	0.962493	0.439351	0.75724	0.533953	0.0278631	0.187893	0.0244307
PTPRO	0.272759	0.0222433	0.195819	0.0640385	0.0878879	0.63656	0.869435	0.0577603	0.471547	0.460947	0.550276	0.123743	0.122341	0.155713	0.0611472	0.0560311	0.472108	0.152025	0.542782	0.894635	0.659408	0.154882	0.185674	0.49884	0.118385	0.172939	0.28797	0.00463775	0.154865	0.0472352	0.113806	0.434761	0.00733427	0.347272	0.0170506	0.27908	0.325511	0.488759	0.149758	0.344446	0.560715	0.666246	0.0148693	0.376352	0.245618	0.524415	0.449889	0.207875	0.726829
TM4SF4	0.951213	0.681743	0.938716	0.160799	0.587891	0.922736	0.360822	0.985565	0.83472	0.416416	0.364456	0.350926	0.35836	0.848405	0.968064	0.193414	0.23324	0.627588	0.4465	0.813034	0.744287	0.682656	0.48914	0.344234	0.950941	0.693182	0.186311	0.524067	0.547165	0.84805	0.363068	0.304116	0.834822	0.918064	0.369251	0.329168	0.55089	0.74408	0.0398683	0.129064	0.0664663	0.620575	0.261709	0.329999	0.320448	0.0163999	0.203016	0.492811	0.0190381
DPYS	0.688478	0.95463	0.258751	0.821672	0.592086	0.0429687	0.849587	0.165872	0.0274104	0.57029	0.407649	0.3502	0.00835392	0.208813	0.631052	0.676963	0.854758	0.962532	0.692537	0.202313	0.965591	0.312205	0.94758	0.80385	0.375016	0.57422	0.00775412	0.138263	0.861586	0.768887	0.853174	0.163496	0.389371	0.158439	0.770131	0.00784823	0.153136	0.765242	0.0225271	0.631451	0.330394	0.233575	0.517897	0.242615	0.377687	0.469471	0.00440614	0.0531175	0.00554633
BEND6	0.973737	0.396162	0.558426	0.0534776	0.651386	0.327433	0.334603	0.0129913	0.305274	0.607809	0.998945	0.559751	0.273832	0.144137	0.288325	0.354262	0.641095	0.702104	0.230182	0.618198	0.895829	0.415242	0.837149	0.321995	0.553681	0.737336	0.508055	0.0611093	0.666741	0.0591082	0.0702656	0.901157	0.134006	0.743678	0.201712	0.207373	0.0321353	0.754633	0.4644	0.851456	0.912863	0.774048	0.184502	0.90703	0.128378	0.435126	0.484933	0.285521	0.490752
CCL21	0.499511	0.709823	0.309153	0.716968	0.788346	0.462284	0.391385	0.858762	0.624556	0.756208	0.328906	0.337284	0.600376	0.711686	0.333082	0.689069	0.423826	0.52096	0.351691	0.476014	0.0454189	0.985839	0.739549	0.4764	0.891908	0.935087	0.72601	0.470905	0.668745	0.823148	0.597995	0.495394	0.766892	0.653057	0.456732	0.231805	0.542048	0.160324	0.258619	0.67839	0.673463	0.648213	0.707966	0.0581615	0.616239	0.89117	0.19561	0.487146	0.871664
PAPPA2	0.356523	0.0618254	0.195329	0.120004	0.548297	0.451294	0.263497	0.201134	0.504628	0.27416	0.995245	0.503105	0.310012	0.254591	0.00906217	0.352512	0.626448	0.140293	0.0229965	0.724784	0.473573	0.243418	0.321359	0.0414233	0.265626	0.393742	0.593933	0.021287	0.426574	0.00617742	0.00188709	0.634694	0.0119959	0.560374	0.2002	0.0978385	0.0774265	0.339671	0.248617	0.427784	0.503428	0.764628	0.179355	0.253069	0.0568079	0.292347	0.290625	0.0786756	0.858431
ART4	0.987363	0.805606	0.480409	0.231526	0.479472	0.100264	0.562825	0.0137045	0.0612703	0.42984	0.894327	0.67734	0.0870155	0.132546	0.713011	0.850401	0.29994	0.973505	0.537869	0.08021	0.524349	0.206719	0.855732	0.567342	0.392174	0.515136	0.151625	0.176205	0.50021	0.572291	0.39102	0.629407	0.324652	0.297935	0.419458	0.162601	0.139737	0.536898	0.446295	0.96535	0.665903	0.137207	0.578068	0.986045	0.443352	0.638991	0.279035	0.210626	0.208287
GUCY2C	0.00768525	0.0196577	0.0284138	0.684953	0.0908685	0.434047	0.885981	0.56099	0.398705	0.152332	0.720491	0.32078	0.0773572	0.490679	0.00454145	0.427625	0.526669	0.00916783	0.164522	0.664095	0.586238	0.0523557	0.0338194	0.156229	0.0555414	0.0542915	0.183139	0.0256575	0.188707	0.374403	0.104939	0.502957	0.00229313	0.0659248	0.267486	0.0458376	0.566219	0.628219	0.0293577	0.150815	0.301367	0.661881	0.273343	0.0178539	0.44987	0.754081	0.0608035	0.0177716	0.656864
CPA3	0.811788	0.38755	0.919834	0.237058	0.704797	0.638364	0.743223	0.170085	0.818344	0.438262	0.531552	0.172004	0.660934	0.410134	0.581643	0.00164723	0.605791	0.952141	0.618639	0.513667	0.555311	0.847333	0.917458	0.554312	0.868073	0.908194	0.78594	0.159443	0.884277	0.0890364	0.690712	0.548864	0.332107	0.581346	0.171696	0.955156	0.383211	0.336804	0.421496	0.825126	0.637044	0.573927	0.00190525	0.97066	0.249292	0.778042	0.846163	0.949381	0.634359
ALDH1A2	0.030105	0.175904	0.0197688	0.626869	0.0727276	0.127461	0.641651	0.663937	0.10742	0.00136756	0.959261	0.868358	0.0923083	0.451911	0.152985	0.366629	0.0111832	0.0619092	0.172494	0.264355	0.598034	0.00033555	0.022509	0.0700396	0.0130574	0.0045243	0.15207	0.317665	0.0244267	0.950279	0.23168	0.715592	0.11958	0.000886811	0.43982	0.140036	0.961276	0.53292	0.412817	0.139258	0.170997	0.0574222	0.633651	0.190653	0.964845	0.224062	0.127556	0.0229613	0.987649
F7	0.820829	0.602685	0.874149	0.17544	0.52644	0.940088	0.233005	0.980228	0.922004	0.351144	0.487249	0.46891	0.413767	0.913617	0.852198	0.215108	0.307834	0.504557	0.297945	0.94056	0.9397	0.67362	0.418508	0.234488	0.975522	0.66631	0.201958	0.629078	0.604259	0.885154	0.272568	0.375248	0.885339	0.828407	0.45878	0.475455	0.639703	0.982139	0.0823281	0.0811085	0.0337199	0.688152	0.286789	0.560657	0.368435	0.0124416	0.327742	0.590067	0.0153429
F10	0.437928	0.32385	0.013506	0.460954	0.587568	0.0847969	0.044453	0.71651	0.145713	0.0695857	0.0657364	0.0979897	0.231158	0.0662815	0.0816351	0.856575	0.467823	0.367518	0.110571	0.717854	0.0448906	0.312424	0.406931	0.0572594	0.125393	0.313212	0.304349	0.16502	0.339425	0.397689	0.20065	0.658266	0.46031	0.281892	0.720989	0.0901718	0.328221	0.0484631	0.239232	0.761771	0.413173	0.999922	0.680281	0.00944354	0.100228	0.20999	0.0941534	0.0834848	0.873609
PROZ	0.811451	0.647189	0.144891	0.743956	0.561742	0.00652188	0.433704	0.502658	0.00667812	0.285461	0.106251	0.287613	0.0520327	0.157176	0.976196	0.639404	0.5351	0.840725	0.8073	0.0496819	0.693847	0.359784	0.924354	0.724876	0.343945	0.503652	0.0314999	0.522616	0.71569	0.256279	0.792788	0.0939852	0.895822	0.0943161	0.278205	0.077201	0.525221	0.995354	0.212419	0.694711	0.691547	0.115913	0.763157	0.191672	0.743193	0.939393	0.0236652	0.173197	0.204676
IL1RL1	0.849357	0.415714	0.96615	0.347477	0.77234	0.70937	0.740088	0.17286	0.872604	0.394086	0.490982	0.143012	0.56389	0.410382	0.514997	0.000161686	0.444128	0.947578	0.685249	0.44739	0.463717	0.805717	0.859859	0.565129	0.900742	0.844078	0.678099	0.114531	0.971669	0.103195	0.686063	0.492245	0.290998	0.593965	0.2525	0.750554	0.278042	0.292242	0.2601	0.741814	0.519105	0.49937	0.000282942	0.852444	0.18193	0.593006	0.936357	0.91807	0.444785
STC2	0.884847	0.560384	0.435681	0.230458	0.696962	0.202985	0.367675	0.00808809	0.187137	0.986384	0.311248	0.0929726	0.0979576	0.0545013	0.293248	0.0477129	0.672387	0.924968	0.44235	0.817893	0.277135	0.728134	0.860191	0.656432	0.666319	0.995298	0.213708	0.00861743	0.904634	0.180027	0.240177	0.386289	0.201421	0.786098	0.584272	0.0509004	0.00214632	0.283095	0.0653611	0.753741	0.481995	0.995366	0.0172545	0.39075	0.0354659	0.930323	0.144436	0.237547	0.12362
GRTP1	0.731812	0.911333	0.0952463	0.476844	0.508002	0.000571681	0.118961	0.186014	0.00166819	0.0558664	0.476674	0.593514	0.0594431	0.0752455	0.531897	0.451207	0.149295	0.796075	0.172862	0.0219862	0.972631	0.107005	0.641269	0.13743	0.202281	0.316975	0.0932955	0.296212	0.397645	0.981525	0.346904	0.610234	0.57935	0.0749497	0.832624	0.0375767	0.212213	0.871356	0.417315	0.913502	0.90741	0.100609	0.730119	0.353293	0.447558	0.315444	0.0500492	0.0555486	0.424212
C8B	0.891942	0.375282	0.584903	0.587644	0.707659	0.0611068	0.975427	0.295685	0.0357195	0.773006	0.457377	0.62545	0.0685793	0.374743	0.58296	0.788579	0.777499	0.515042	0.752054	0.037233	0.592338	0.525021	0.723663	0.704191	0.683633	0.804425	0.0370882	0.63903	0.953369	0.178309	0.508299	0.109547	0.898845	0.216937	0.464707	0.155706	0.489748	0.348543	0.256496	0.465788	0.235995	0.067182	0.889034	0.712677	0.999874	0.408168	0.0835969	0.339557	0.0231626
C8A	0.510526	0.383221	0.0175103	0.565287	0.695724	0.0879264	0.11005	0.659462	0.125473	0.102019	0.0391551	0.0641063	0.148564	0.0436729	0.103924	0.692896	0.472657	0.489938	0.215588	0.603275	0.087762	0.312949	0.519283	0.124145	0.0895709	0.32596	0.160714	0.128547	0.310177	0.344289	0.315888	0.576129	0.430626	0.302722	0.674211	0.0669792	0.283312	0.0668996	0.132107	0.913442	0.704371	0.99614	0.53226	0.0089089	0.0410519	0.37556	0.0610537	0.0506681	0.809671
APOB	0.92096	0.662341	0.291591	0.857769	0.474714	0.0187377	0.775059	0.165073	0.00771988	0.5896	0.192868	0.260321	0.0142474	0.149271	0.940298	0.887233	0.730998	0.73786	0.940871	0.0552717	0.987924	0.385014	0.934459	0.912546	0.440713	0.608368	0.0090709	0.304447	0.850991	0.352334	0.763322	0.0372384	0.831096	0.130081	0.591354	0.0561743	0.319029	0.723623	0.10155	0.598966	0.359674	0.0763237	0.753591	0.376241	0.69784	0.565923	0.0242293	0.189291	0.0276133
MYO5C	0.283648	0.188308	0.149367	0.177218	0.373116	0.173199	0.223525	0.241711	0.207416	0.0518836	0.668079	0.975674	0.249404	0.334566	0.0848337	0.727202	0.149012	0.157643	0.0123607	0.525955	0.873885	0.0534092	0.203744	0.0124931	0.184856	0.187277	0.487994	0.154539	0.243946	0.215136	0.0107519	0.598288	0.0642852	0.174948	0.281983	0.106353	0.247066	0.907984	0.563883	0.256693	0.333059	0.43859	0.91933	0.456414	0.406986	0.123238	0.256383	0.0556161	0.952095
NTS	0.898958	0.384672	0.940368	0.406542	0.830198	0.595504	0.701666	0.259666	0.737023	0.371528	0.533395	0.165151	0.658497	0.50159	0.473654	0.000136474	0.389482	0.890233	0.704791	0.324085	0.425799	0.749775	0.882836	0.581631	0.931869	0.821587	0.770674	0.136359	0.943083	0.0908692	0.68132	0.572134	0.287835	0.532341	0.269306	0.804651	0.32618	0.253226	0.272098	0.765666	0.564251	0.382991	0.000436925	0.812029	0.183685	0.570714	0.986278	0.948435	0.514357
FGF7	0.394966	0.148627	0.283219	0.0821429	0.381234	0.3722	0.372581	0.174363	0.365974	0.123075	0.588012	0.981617	0.345499	0.348401	0.121982	0.978323	0.136105	0.204823	0.0659304	0.594784	0.707203	0.0808518	0.242069	0.0568001	0.207876	0.219679	0.605938	0.15676	0.193189	0.088345	0.0175787	0.531255	0.053429	0.318477	0.109921	0.266929	0.296567	0.871377	0.70761	0.304438	0.391967	0.51329	0.687523	0.746091	0.387658	0.121601	0.52502	0.138117	0.96296
CLEC4F	0.000751237	0.0128511	0.0468911	0.519469	0.0345834	0.70193	0.946127	0.903118	0.642075	0.0102613	0.801597	0.929772	0.388901	0.857975	0.0494414	0.616427	0.0270541	0.000795577	0.219291	0.992793	0.753579	0.00440459	2.24952e-05	0.0806418	0.0164505	0.000864318	0.558313	0.390133	0.0057893	0.576206	0.15235	0.99762	0.0481745	0.0259231	0.130927	0.516275	0.489389	0.807515	0.634861	0.0111897	0.0113216	0.306733	0.847685	0.213016	0.774181	0.146041	0.518189	0.128813	0.367874
PNPLA1	0.3587	0.560792	0.152235	0.734662	0.884797	0.334064	0.260247	0.766938	0.510699	0.41639	0.364111	0.391677	0.498119	0.607351	0.152965	0.877142	0.684348	0.367427	0.137354	0.571205	0.0592469	0.745118	0.5896	0.186342	0.595186	0.719929	0.59616	0.382482	0.923538	0.896052	0.377541	0.769886	0.566344	0.514109	0.418917	0.109734	0.449297	0.142631	0.194362	0.706815	0.589696	0.60081	0.827587	0.0127823	0.358418	0.884087	0.094638	0.20733	0.879473
CENPK	0.224451	0.134272	0.232917	0.3915	0.0329219	0.521988	0.782135	0.0916524	0.349687	0.735098	0.397822	0.0887225	0.0560786	0.287481	0.227865	0.0664341	0.853895	0.240349	0.937213	0.934219	0.63722	0.242369	0.246912	0.979595	0.250061	0.237252	0.150959	0.0212182	0.402545	0.618338	0.46797	0.0518867	0.0582394	0.196724	0.121529	0.214936	0.496715	0.732335	0.0562599	0.338736	0.767157	0.367591	0.0352792	0.288938	0.695876	0.854338	0.246662	0.297534	0.375464
COL12A1	0.0711204	0.0414146	0.0854214	0.315802	0.35639	0.449134	0.394135	0.687859	0.505932	0.0246791	0.636581	0.974107	0.376943	0.564922	0.0106235	0.788104	0.129666	0.0238684	0.00978416	0.991264	0.98198	0.035721	0.0560686	0.0032575	0.0789917	0.0786556	0.605408	0.177745	0.106694	0.110746	0.0076134	0.429513	0.0188771	0.177667	0.237517	0.174295	0.552523	0.873054	0.495038	0.151201	0.140506	0.768701	0.896297	0.222465	0.385647	0.121244	0.314711	0.0352326	0.717156
HTR1B	0.464022	0.625932	0.229777	0.860816	0.725375	0.384915	0.276219	0.898049	0.548702	0.598791	0.29256	0.308161	0.574817	0.60651	0.269769	0.752576	0.553453	0.456556	0.263482	0.537684	0.0323048	0.907233	0.650791	0.348571	0.782125	0.833732	0.722032	0.431582	0.792726	0.913075	0.483938	0.53184	0.72891	0.582991	0.494894	0.212184	0.520191	0.125532	0.285002	0.599933	0.54677	0.690455	0.743952	0.0442593	0.566651	0.898273	0.187224	0.431367	0.993892
RAB6B	0.88229	0.45268	0.50189	0.230955	0.466151	0.582296	0.688769	0.0671979	0.46968	0.739715	0.0523522	0.00315057	0.226591	0.0705495	0.457326	0.00122816	0.602413	0.971104	0.82436	0.872102	0.106156	0.987048	0.953047	0.757287	0.631404	0.945181	0.329297	0.0397593	0.891343	0.266276	0.663043	0.102904	0.41404	0.966411	0.493715	0.396153	0.163166	0.0859087	0.127943	0.802357	0.663552	0.875942	0.000736205	0.408156	0.133977	0.865432	0.482965	0.682503	0.421987
CDK15	0.486001	0.675471	0.301455	0.802165	0.745762	0.457877	0.332852	0.857016	0.630869	0.695624	0.363672	0.373906	0.651726	0.718956	0.323724	0.767263	0.479751	0.481698	0.302211	0.480356	0.0441337	0.984648	0.686701	0.412598	0.89405	0.904984	0.807135	0.499155	0.702797	0.833152	0.532838	0.547422	0.776741	0.638866	0.499217	0.262073	0.570891	0.161048	0.33072	0.579297	0.56049	0.674435	0.776674	0.0698589	0.6729	0.972749	0.233452	0.519027	0.994675
GALNT3	0.156167	0.0193659	0.215213	0.417854	0.211468	0.951002	0.803162	0.435592	0.902738	0.686917	0.442457	0.0931078	0.241115	0.409862	0.0322197	0.0176542	0.933289	0.105646	0.693166	0.324616	0.37285	0.353742	0.197861	0.657023	0.165417	0.252353	0.369177	0.0197909	0.283058	0.0782151	0.264984	0.43869	0.0143912	0.527915	0.122705	0.332567	0.560394	0.240099	0.0570978	0.459383	0.611329	0.755782	0.00801941	0.12935	0.217433	0.985187	0.409491	0.235771	0.745322
SLC38A11	0.467651	0.592878	0.302984	0.937728	0.637436	0.466095	0.208483	0.858248	0.664608	0.542257	0.497546	0.51347	0.820535	0.751988	0.320363	0.990473	0.676771	0.394508	0.199444	0.513468	0.0549748	0.900858	0.554078	0.270459	0.90484	0.823409	0.945434	0.60449	0.81573	0.869247	0.37872	0.725868	0.814834	0.613507	0.650063	0.386836	0.674639	0.186274	0.609599	0.342899	0.296936	0.765289	0.989405	0.13383	0.856711	0.596492	0.390062	0.634801	0.621475
RTN1	0.705674	0.499596	0.503913	0.808285	0.702256	0.0840741	0.985471	0.163468	0.0405681	0.974295	0.0663819	0.113819	0.0345288	0.120263	0.702125	0.473329	0.950129	0.402497	0.47643	0.0964037	0.828427	0.738604	0.573264	0.461396	0.602286	0.916959	0.0121331	0.333398	0.965071	0.43999	0.434626	0.0124747	0.938202	0.38064	0.500956	0.153102	0.315426	0.981538	0.0896844	0.243483	0.125873	0.216466	0.434841	0.491572	0.514215	0.315312	0.0790408	0.386483	0.0108889
FGL2	0.866542	0.312386	0.408161	0.0601919	0.658785	0.294679	0.28955	0.0403661	0.283845	0.379872	0.993217	0.607684	0.260678	0.136412	0.196901	0.503412	0.425339	0.565838	0.150714	0.561128	0.945146	0.281027	0.678475	0.182668	0.367964	0.55561	0.464525	0.0666308	0.459559	0.0362481	0.0461544	0.746942	0.103058	0.622475	0.220965	0.180912	0.0537886	0.747992	0.467145	0.814182	0.940731	0.769888	0.277481	0.761543	0.0969232	0.304786	0.430151	0.176087	0.596314
FABP7	0.360236	0.204515	0.168819	0.383988	0.894256	0.30635	0.122475	0.585211	0.454046	0.134688	0.840371	0.889519	0.458732	0.420873	0.0213416	0.993254	0.575568	0.179724	0.000391136	0.865541	0.498718	0.270861	0.38779	0.00251372	0.333726	0.462704	0.704844	0.151159	0.563713	0.0761609	0.0049863	0.335956	0.0894299	0.512221	0.684575	0.0704769	0.126632	0.43021	0.393046	0.507345	0.44632	0.713257	0.735412	0.176271	0.0964927	0.237577	0.198724	0.0496349	0.983705
PKIB	0.115654	0.137744	0.00552038	0.292871	0.00913432	0.0596092	0.674938	0.141457	0.0198087	0.0381217	0.17057	0.0885642	0.00218557	0.0491981	0.1783	0.688001	0.0506716	0.181563	0.601747	0.17933	0.876578	0.00393854	0.0713885	0.373102	0.00243386	0.00798486	0.0113538	0.0427286	0.0169005	0.759306	0.400087	0.0724617	0.1	0.00173401	0.292001	0.0880944	0.67867	0.917773	0.101455	0.343747	0.444913	0.0328455	0.441373	0.114871	0.618008	0.397483	0.0700388	0.0349286	0.576301
GC	0.940286	0.57006	0.348786	0.654301	0.628079	0.0294409	0.85866	0.249577	0.0164603	0.657821	0.252273	0.346552	0.0225497	0.223222	0.906075	0.945138	0.842266	0.688667	0.942298	0.0756857	0.949224	0.45238	0.844221	0.8868	0.508801	0.697454	0.0110373	0.367961	0.970215	0.316923	0.692514	0.0651579	0.87161	0.166613	0.462794	0.0513766	0.32531	0.666101	0.0908361	0.49287	0.276097	0.1201	0.827732	0.367937	0.679649	0.431086	0.0190313	0.179272	0.0139714
ALB	0.872586	0.645746	0.283507	0.764489	0.515192	0.0185223	0.784548	0.217536	0.00884194	0.548316	0.234014	0.322029	0.0165508	0.185062	0.957449	0.99119	0.715556	0.767711	0.999903	0.0571183	0.962484	0.367627	0.954256	0.971194	0.434315	0.594513	0.00957835	0.340009	0.855105	0.325032	0.767077	0.0558801	0.830603	0.119263	0.533937	0.0490094	0.342208	0.671628	0.102545	0.601407	0.369321	0.0807528	0.852599	0.351414	0.716097	0.553783	0.0186407	0.163565	0.0272401
CPS1	0.868062	0.566374	0.334054	0.631954	0.513517	0.0332707	0.917377	0.312396	0.0170222	0.587532	0.254295	0.383245	0.0292239	0.26347	0.818471	0.89767	0.706875	0.724632	0.847897	0.0540278	0.862578	0.397797	0.950268	0.844661	0.469892	0.596982	0.0141637	0.471947	0.86129	0.204301	0.600487	0.0465793	0.959753	0.118238	0.479164	0.0914069	0.503498	0.563633	0.143512	0.602852	0.37582	0.0633046	0.99051	0.406258	0.905806	0.493345	0.0338101	0.225078	0.0377526
AFM	0.185718	0.340509	0.036293	0.671306	0.106146	0.0470552	0.896343	0.136928	0.0157448	0.118342	0.37583	0.234992	0.000127856	0.113823	0.245343	0.711694	0.177542	0.332032	0.564824	0.157717	0.796664	0.0157764	0.233351	0.459819	0.0238742	0.0591049	0.000926387	0.0442734	0.126357	0.857859	0.499291	0.137418	0.0849735	0.00826294	0.519177	0.0154196	0.404651	0.734283	0.0261495	0.71237	0.996557	0.0585367	0.462899	0.137292	0.464674	0.90926	0.0106216	0.00679386	0.125651
CXCL8	0.955946	0.564217	0.540633	0.64719	0.63675	0.528951	0.407858	0.314086	0.615497	0.943683	0.515492	0.263808	0.37045	0.268638	0.155592	0.0892274	0.395969	0.833593	0.254512	0.579726	0.181029	0.956711	0.747848	0.441724	0.799942	0.759146	0.473293	0.0583895	0.694831	0.0638517	0.22043	0.941843	0.226565	0.783058	0.984536	0.0758331	0.00983164	0.122482	0.0730941	0.51306	0.461038	0.255779	0.0587591	0.215238	0.00159147	0.766791	0.177903	0.200883	0.222532
CPN2	0.529671	0.357432	0.0177533	0.444213	0.666432	0.0875198	0.0896535	0.626261	0.122169	0.0700891	0.0533701	0.0848688	0.16981	0.0364758	0.10985	0.785964	0.338928	0.481541	0.200324	0.517028	0.12478	0.264778	0.479907	0.0980269	0.0722372	0.283562	0.188202	0.146222	0.233281	0.293581	0.276367	0.665004	0.433967	0.29329	0.770106	0.0954185	0.312938	0.0856191	0.203868	0.966285	0.621485	0.933181	0.598788	0.0217536	0.0476701	0.253221	0.0961189	0.0578697	0.936619
PLEK2	0.184016	0.271915	0.0251304	0.378862	0.0697265	0.0185193	0.503731	0.0792551	0.00779612	0.0588757	0.49207	0.308958	0.00200891	0.0902863	0.177558	0.891913	0.139352	0.241145	0.257611	0.163418	0.955664	0.00997776	0.17408	0.212764	0.0409709	0.0592254	0.0185595	0.038478	0.1436	0.773385	0.221779	0.238441	0.0761458	0.00607226	0.414895	0.0123978	0.295554	0.822799	0.0881142	0.412581	0.662673	0.0486557	0.580105	0.167101	0.521664	0.511162	0.0193123	0.0106296	0.298376
WNT2	0.970779	0.259603	0.911262	0.104385	0.643375	0.853654	0.962565	0.0938038	0.981005	0.820023	0.868802	0.360894	0.55369	0.346944	0.386267	0.0374457	0.958197	0.725849	0.925567	0.75153	0.86534	0.755413	0.855461	0.978989	0.637642	0.834107	0.737777	0.10807	0.613844	0.0219104	0.324221	0.914572	0.152308	0.803083	0.0721302	0.748812	0.265044	0.55638	0.492358	0.972487	0.823823	0.773521	0.0183094	0.915654	0.19083	0.828695	0.950952	0.722378	0.679523
AOAH	0.00751034	0.000285622	0.073921	0.279722	0.0429077	0.867072	0.900287	0.611477	0.729638	0.0902848	0.95901	0.528627	0.249444	0.588301	0.0103062	0.54058	0.121578	0.00194508	0.300257	0.721887	0.93101	0.0162407	0.00316241	0.17056	0.0158355	0.00826113	0.424106	0.0851608	0.0117687	0.12879	0.0836623	0.874979	0.000859364	0.106635	0.0198738	0.392623	0.950985	0.863946	0.293401	0.0590606	0.0989302	0.57436	0.347124	0.207784	0.650553	0.300193	0.487304	0.0976392	0.706025
SCG2	0.677595	0.370505	0.306805	0.0711722	0.454104	0.442448	0.0537958	0.786369	0.55798	0.0676719	0.904498	0.977988	0.912012	0.425577	0.430188	0.323706	0.0908795	0.388883	0.135383	0.588216	0.606686	0.326295	0.291032	0.0526102	0.415038	0.342735	0.649452	0.868094	0.227502	0.469467	0.126737	0.512601	0.817394	0.507693	0.534672	0.98396	0.997086	0.567772	0.3518	0.175934	0.0372639	0.62936	0.488407	0.845466	0.960464	1.77064e-05	0.80443	0.774946	0.0508031
GLRB	0.570133	0.682723	0.786665	0.115485	0.8073	0.375512	0.140384	0.0436047	0.455549	0.991743	0.847145	0.50407	0.525659	0.171787	0.351561	0.252827	0.695447	0.964059	0.164384	0.978676	0.36349	0.993309	0.665285	0.343058	0.941593	0.658697	0.811099	0.103127	0.688983	0.0544493	0.0819651	0.729028	0.347795	0.728475	0.601637	0.205329	0.00125752	0.305492	0.492444	0.803403	0.671834	0.602375	0.152786	0.82724	0.0374007	0.599873	0.506016	0.469327	0.488904
TDO2	0.63686	0.523665	0.596478	0.274606	0.481603	0.727138	0.128741	0.926855	0.924716	0.31382	0.779588	0.755152	0.579535	0.968458	0.589531	0.328825	0.53072	0.374012	0.163853	0.842607	0.460416	0.697458	0.369046	0.148314	0.981288	0.661898	0.303191	0.858386	0.749343	0.960277	0.205689	0.578679	0.982655	0.705837	0.686981	0.822576	0.837338	0.631603	0.282063	0.0642638	0.0255	0.840731	0.404057	0.931438	0.524668	0.032136	0.672885	0.811311	0.0385476
PALS2	0.421387	0.474802	0.0776209	0.568822	0.484012	0.0546003	0.553756	0.227699	0.0361586	0.0728489	0.571746	0.491421	0.021298	0.108237	0.249459	0.959533	0.109798	0.510044	0.307727	0.109995	0.710631	0.0393098	0.431334	0.212786	0.0410157	0.145352	0.023345	0.115026	0.144044	0.460094	0.341159	0.691393	0.153129	0.0811055	0.724369	0.0308014	0.270223	0.818425	0.13405	0.938713	0.903671	0.223713	0.728835	0.244885	0.189419	0.588892	0.041344	0.00540283	0.228848
STK31	1.81763e-05	0.0100773	0.0364758	0.778687	0.04827	0.785122	0.800816	0.809959	0.694002	0.0312942	0.982299	0.722609	0.283304	0.87326	0.030695	0.909204	0.0841022	0.000681401	0.33086	0.819814	0.848513	0.00883061	0.000208216	0.156392	0.00920317	0.00117622	0.377846	0.290236	0.00977624	0.563692	0.245463	0.80392	0.0261786	0.0292179	0.185966	0.400129	0.510396	0.926295	0.328104	0.0459192	0.0534696	0.429924	0.889275	0.0952052	0.954648	0.384865	0.355024	0.0774369	0.619058
ADAM22	0.439738	0.491198	0.0542458	0.967971	0.725632	0.162813	0.17453	0.886643	0.25194	0.31252	0.0694175	0.0898068	0.242345	0.201325	0.12947	0.597476	0.90507	0.455181	0.221681	0.895688	0.0191172	0.602295	0.600639	0.220037	0.330367	0.569449	0.292945	0.184423	0.787765	0.706569	0.407468	0.435612	0.527914	0.400575	0.466822	0.061052	0.313588	0.0476087	0.0904492	0.915303	0.706437	0.767078	0.524705	0.00201121	0.150209	0.76086	0.0455877	0.126926	0.738738
IGFBP1	0.536633	0.279235	0.0376159	0.149881	0.504437	0.129152	0.0236767	0.638115	0.190188	0.0198926	0.225122	0.292743	0.426398	0.0756896	0.145627	0.751063	0.118676	0.365531	0.0978294	0.461722	0.222395	0.200928	0.309765	0.0253378	0.104159	0.219803	0.560759	0.320147	0.139885	0.273677	0.124264	0.951083	0.528379	0.298335	0.889569	0.322734	0.520973	0.168753	0.762659	0.539658	0.193455	0.752629	0.990703	0.160537	0.22777	0.0142145	0.39344	0.190297	0.406824
HPD	0.988502	0.470827	0.405926	0.609644	0.662972	0.0299725	0.84176	0.306476	0.0188253	0.640293	0.325388	0.477722	0.0428886	0.285992	0.776184	0.837577	0.789617	0.633671	0.935901	0.0528177	0.84153	0.471356	0.817148	0.887288	0.579222	0.728651	0.0236951	0.510755	0.994028	0.219244	0.63579	0.0909278	0.987483	0.167978	0.406732	0.0816065	0.406058	0.542112	0.168296	0.519217	0.306474	0.0912304	0.951824	0.465514	0.844254	0.4763	0.0344305	0.23316	0.0276566
HECW1	0.531755	0.510035	0.43058	0.450672	0.498884	0.588622	0.112044	0.890921	0.806483	0.346821	0.928767	0.953667	0.782035	0.87375	0.434842	0.514452	0.806494	0.333389	0.130681	0.684605	0.207194	0.752376	0.389829	0.143248	0.947367	0.696464	0.477329	0.925347	0.905811	0.971956	0.21594	0.821398	0.933673	0.639535	0.933932	0.842015	0.971597	0.388089	0.626799	0.0990872	0.0535747	0.990904	0.582072	0.522715	0.726348	0.114362	0.948614	0.97161	0.128214
[truncated: 7 more columns]

## Sheet: GeneCorMet_visceral
	23-Nordeoxycholic acid	L-Tryptophan	PC (18:0/20:4)	11(E)-Eicosenoic Acid	10-Hydroxydecanoic acid	PC (18:0/20:3)	SM (d14:1/20:0)	PC (16:0/16:1)	PC (18:0/22:4)	2-(3,4-dimethoxyphenyl)ethanamine	PC (16:0/18:1)	PC (16:1e/18:2)	PC (18:1e/18:2)	methadone-d9	(2R,3S,4S,5R,6R)-2-(hydroxymethyl)-6-(propan-2-yloxy)oxane-3,4,5-triol	PC (16:1e/19:2)	ACar 15:1	Biliverdin	Bicyclo prostaglandin E2	2-(2-amino-3-methylbutanamido)-3-phenylpropanoic acid	PC (17:0/18:2)	ACar 20:1	Palmitoylcarnitine	cis-gondoic acid	ACar 20:0	ACar 18:0	16-Heptadecyne-1,2,4-triol	5-OxoETE	ACar 18:1	PC (18:1e/14:1)	9-Oxo-ODE	PC (18:3e/20:2)	PC (20:0/20:3)	Prostaglandin E2	2-[(3S)-1-(2-Methylbenzyl)-3-pyrrolidinyl]-1H-imidazo[4,5-b]pyridine	4,6,8-trihydroxy-7-methoxy-3-methyl-3,4-dihydro-1H-2-benzopyran-1-one	PC (14:1e/19:2)	PC (18:3e/15:0)	Radicinin	PC (14:0e/18:0)	PC (18:1e/16:2)	ACar 13:0	PC (19:1/18:2)	PC (18:5e/4:0)	PC (20:5e/15:1)	DL-Dipalmitoylphosphatidylcholine	2-(2,4-dihydroxyphenyl)-3,5,7-trihydroxy-4H-chromen-4-one	4-morpholino-3-nitrobenzene-1-sulfonamide	PC (18:4e/17:1)
SHROOM3	0.525925	0.0834698	0.584899	-0.396579	0.4204	0.493702	-0.237129	-0.0206793	0.573485	0.481904	0.352229	0.263209	0.707137	0.211122	0.146054	-0.177513	0.424787	0.245248	-0.0840618	0.490639	-0.224596	0.604007	0.382912	0.0383089	0.63395	0.597126	0.816317	0.226603	0.464157	-0.44254	-0.223348	0.591223	0.232004	0.786573	-0.166751	0.526502	-0.159459	-0.308891	0.602378	0.0126759	-0.0482225	0.638823	-0.120763	0.563138	-0.0693085	-0.229504	0.710485	0.634939	0.487818
SLC16A14	0.513973	0.314674	0.650241	0.0665377	0.760808	0.565559	-0.139736	0.455551	0.695782	0.425805	0.517438	0.584335	0.873663	0.494081	0.252816	0.213263	0.424422	0.328499	-0.106967	0.478447	-0.0449485	0.67388	0.478341	-0.0118778	0.67877	0.664066	0.863232	0.558862	0.542717	-0.235997	-0.0217836	0.872543	0.433395	0.833142	0.240032	0.560516	0.0447395	-0.141458	0.681786	0.223291	0.0517584	0.77269	0.296063	0.510585	-0.01298	-0.0839504	0.666994	0.57645	0.473972
GATA5	0.764808	0.331184	0.614976	-0.432805	0.382541	0.263283	-0.272673	-0.277345	0.306764	0.573087	0.102548	0.0825224	0.52985	-0.01378	0.407962	-0.219803	0.431386	0.538994	0.145854	0.15043	-0.215798	0.652317	0.587965	0.26869	0.682279	0.685963	0.61004	0.210677	0.540119	-0.218603	-0.0022288	0.264906	0.431533	0.735965	-0.0471842	0.47943	-0.265999	-0.246039	0.559669	0.221159	0.198052	0.382545	-0.159559	0.66307	-0.0437823	-0.12821	0.629587	0.697704	0.255158
DPP4	0.822395	0.485699	0.758914	-0.0728931	0.748705	0.423239	-0.159819	0.0270595	0.51119	0.7269	0.235965	0.26007	0.683097	0.218406	0.42633	-0.177841	0.683867	0.632179	0.125902	0.352353	-0.202789	0.858857	0.772983	0.296048	0.837819	0.893092	0.688755	0.353678	0.770409	-0.215267	0.106033	0.502297	0.507817	0.946163	0.240625	0.461737	-0.274408	-0.258817	0.500676	0.471152	0.408459	0.710306	-0.0769784	0.603156	-0.163126	0.140887	0.589064	0.676618	0.128355
CLDN1	0.272716	-0.176752	0.365274	-0.568896	0.174313	0.438139	-0.308276	-0.0213894	0.509296	0.188466	0.373914	0.253796	0.637944	0.154051	-0.0529576	-0.0723137	0.121486	-0.0306889	-0.241521	0.451409	-0.191467	0.326643	0.0711682	-0.189056	0.379399	0.299117	0.789756	0.145974	0.155308	-0.540172	-0.417843	0.619568	0.0502447	0.559868	-0.37718	0.504233	-0.0477388	-0.295869	0.631784	-0.272295	-0.363691	0.489193	-0.0609163	0.461525	-0.0139272	-0.512015	0.698021	0.501314	0.699526
CYP4B1	0.346672	0.678814	0.33773	0.443069	0.486267	-0.0610391	-0.113241	0.473226	0.0373755	-0.0128991	0.369856	0.689698	0.417385	0.389787	0.575251	0.910853	-0.0632339	0.433163	0.000346736	-0.359486	0.384282	0.234024	0.353191	-0.00168453	0.389503	0.31076	0.305708	0.761139	0.317818	0.620494	0.353115	0.418965	0.684817	0.133183	0.631147	0.271025	0.286455	0.47885	0.596607	0.23316	0.10777	-0.109691	0.93935	0.391705	0.442707	-0.0287363	0.200249	0.275747	0.153516
ANKRD62	0.782464	0.771001	0.821419	0.314403	0.778264	0.43829	-0.019125	0.446767	0.538486	0.638559	0.324416	0.552403	0.844052	0.507383	0.752778	0.360075	0.538554	0.730158	0.311862	0.160427	0.0448285	0.86127	0.756709	0.409157	0.893158	0.848013	0.755169	0.825332	0.76397	0.35671	0.475922	0.486587	0.885926	0.812793	0.562767	0.681818	0.193723	0.074434	0.772405	0.447851	0.320788	0.475771	0.49831	0.696235	0.319173	0.184199	0.678913	0.830449	0.284494
ATP1A2	-0.154892	0.30021	-0.0880769	0.460331	0.109838	-0.158191	-0.0496746	0.586487	-0.0894217	-0.407637	0.232723	0.523079	0.163754	0.322382	0.234245	0.945692	-0.390742	-0.00492631	-0.117398	-0.352392	0.36004	-0.181673	-0.12438	-0.224617	-0.0712028	-0.175552	0.057471	0.574105	-0.122646	0.604694	0.227365	0.246668	0.376186	-0.292815	0.47292	0.0958686	0.490949	0.450218	0.356087	-0.0824312	-0.23212	-0.30652	0.934622	-0.00384696	0.476672	-0.170393	-0.0357116	-0.0539543	0.250611
SCX	-0.253355	0.0231178	0.164594	0.522161	-0.212312	0.478047	0.887446	0.412429	0.327901	0.228536	0.020713	0.0433274	0.0300675	0.423851	0.302047	-0.0581844	-0.0437821	-0.0237627	0.775047	0.0938443	0.465116	-0.0248742	-0.158923	0.651414	-0.11418	-0.20691	-0.135643	0.293857	-0.212197	0.45614	0.680602	-0.374707	0.0875665	-0.113605	-0.0825866	0.40472	0.750031	0.43386	-0.0475763	0.0232196	0.0973318	-0.209267	0.0400304	0.107155	0.533273	0.522502	0.207002	0.215784	-0.0765288
ERBB3	0.894309	0.542863	0.757177	-0.170185	0.560443	0.358917	-0.0717906	-0.135704	0.383138	0.753357	0.0506662	0.0998941	0.571476	0.0823605	0.607724	-0.233361	0.562727	0.747051	0.402255	0.126891	-0.130246	0.81047	0.778362	0.519412	0.77629	0.822248	0.55902	0.355812	0.659044	-0.0604091	0.29639	0.203137	0.607856	0.848061	0.158844	0.560588	-0.17234	-0.172942	0.529189	0.490066	0.452186	0.441696	-0.126987	0.715755	-0.0217926	0.145242	0.647409	0.781985	0.0942221
PPP1R14A	-0.031635	0.408694	-0.00939491	0.505123	0.174698	-0.122836	0.0787056	0.566035	-0.0933141	-0.32417	0.157539	0.481662	0.140184	0.283817	0.379971	0.898343	-0.419098	0.157306	0.100755	-0.476553	0.474997	-0.13921	-0.00955681	-0.040593	-0.0824406	-0.138269	-0.0275554	0.622004	-0.149255	0.630013	0.414283	0.176895	0.465261	-0.24139	0.508192	0.173755	0.535643	0.519615	0.355577	0.115697	-0.0520054	-0.347617	0.901399	0.0941322	0.452323	-0.063282	0.0127582	-0.00437795	0.143864
GZMK	0.409366	0.205991	0.603906	-0.0700085	0.585929	0.559888	-0.169686	0.419823	0.68261	0.306891	0.60809	0.650091	0.890819	0.512878	0.221327	0.317163	0.262418	0.199509	-0.167551	0.44464	0.0281318	0.546055	0.315517	-0.0966189	0.618315	0.531505	0.926282	0.573194	0.414005	-0.219987	-0.119288	0.887654	0.379944	0.722942	0.0721609	0.624769	0.142918	-0.0534911	0.802594	-0.00412318	-0.158007	0.628538	0.377632	0.572571	0.144213	-0.265245	0.747623	0.602924	0.642396
MUSTN1	0.0524876	0.525596	0.11177	0.590768	0.261345	-0.0835852	0.0942337	0.594298	-0.0363402	-0.192275	0.229091	0.561402	0.22112	0.380533	0.4743	0.915477	-0.260892	0.242935	0.121073	-0.415998	0.465957	-0.00685811	0.10161	0.030029	0.08655	0.00559406	0.0576811	0.700671	0.0319341	0.731055	0.468634	0.196919	0.557258	-0.147225	0.592413	0.204163	0.514068	0.551687	0.399914	0.150286	0.0184374	-0.291971	0.939938	0.165545	0.520447	0.039052	0.045931	0.0937625	0.107026
SUSD3	0.600732	0.158445	0.600994	-0.434518	0.426316	0.419318	-0.268831	-0.0912114	0.491807	0.460943	0.344659	0.282328	0.676832	0.155928	0.227449	-0.112467	0.355344	0.327103	-0.0563777	0.344926	-0.151737	0.583164	0.431011	0.0565069	0.633717	0.604101	0.778076	0.252416	0.451059	-0.400016	-0.190367	0.57507	0.28864	0.763907	-0.150481	0.528829	-0.181221	-0.234221	0.648821	0.0627624	0.000657675	0.539347	-0.066935	0.638403	-0.0526087	-0.261632	0.713726	0.642505	0.453247
EPPK1	0.961419	0.684606	0.689725	-0.116507	0.575813	0.11724	-0.162176	-0.262111	0.147248	0.714269	-0.0556464	0.0406548	0.396995	-0.0512004	0.669247	-0.178695	0.563095	0.859582	0.376141	-0.0893849	-0.132119	0.773303	0.871133	0.515281	0.765026	0.845405	0.371548	0.301472	0.721681	0.0758723	0.340821	0.0691787	0.65882	0.74202	0.311916	0.369939	-0.322566	-0.12102	0.410353	0.609703	0.600729	0.294672	-0.089972	0.654742	-0.0748632	0.213906	0.440906	0.665197	-0.124079
NPPC	-0.0719489	0.338572	-0.0404297	0.367409	0.124426	-0.208184	-0.200376	0.493313	-0.107493	-0.350747	0.260758	0.535294	0.215086	0.303781	0.245168	0.936822	-0.276867	0.0277694	-0.222998	-0.308546	0.24074	-0.0943623	-0.0598999	-0.273654	0.0698053	-0.0613825	0.16324	0.55984	0.0257639	0.610618	0.130152	0.268678	0.416329	-0.227419	0.480783	0.0759678	0.366752	0.380673	0.416573	-0.142433	-0.262614	-0.269285	0.924681	0.041573	0.486835	-0.226464	-0.0152527	0.0194264	0.289028
PACSIN3	0.424513	0.621136	0.334927	0.272643	0.490325	-0.0026225	-0.140524	0.445843	0.0721021	-0.0549612	0.274811	0.607426	0.464254	0.279241	0.585779	0.86071	-0.212148	0.474497	0.0869712	-0.423163	0.385609	0.218917	0.350569	0.0150215	0.296847	0.266114	0.332744	0.764988	0.157747	0.447971	0.359935	0.4625	0.709809	0.196643	0.537035	0.409519	0.338217	0.392029	0.698049	0.29187	0.0769171	-0.0849526	0.884528	0.46719	0.354074	-0.181914	0.347633	0.333125	0.288818
BRSK2	0.748701	0.956249	0.719378	0.597407	0.666276	0.230317	0.297031	0.36083	0.237644	0.614534	0.096558	0.39964	0.459384	0.38398	0.953754	0.362858	0.393383	0.892932	0.677924	-0.252053	0.335297	0.682862	0.797109	0.713578	0.675652	0.69009	0.247874	0.786783	0.622292	0.695077	0.87161	0.0526505	0.924953	0.522003	0.704965	0.513607	0.280094	0.385695	0.471968	0.720716	0.662828	0.0735547	0.49952	0.619804	0.380318	0.532738	0.388032	0.637367	-0.186956
ZNF169	0.315944	0.081706	0.685854	0.0395821	0.581525	0.743475	0.161712	0.315681	0.813489	0.544958	0.693437	0.574781	0.763999	0.593307	0.0998887	-0.0836291	0.50192	0.127257	-0.0531962	0.68997	0.104561	0.577659	0.329221	0.0875037	0.626248	0.566391	0.796465	0.34665	0.491781	-0.388481	-0.11067	0.802577	0.0958617	0.792526	-0.107152	0.507818	0.0195912	-0.0173632	0.480913	0.0776254	0.0727273	0.76928	-0.00663665	0.521022	-0.00138858	0.106099	0.649408	0.506363	0.31193
CFHR5	0.301164	-0.116457	0.430018	-0.342121	0.415618	0.554318	-0.229136	0.166704	0.650104	0.304695	0.391132	0.285869	0.709549	0.264089	-0.0900695	-0.141097	0.319336	0.0176031	-0.241881	0.628015	-0.251453	0.472123	0.192071	-0.161011	0.450773	0.431435	0.808499	0.178669	0.294442	-0.602383	-0.354023	0.741658	0.0626072	0.714174	-0.195277	0.465958	-0.0854219	-0.389119	0.5229	-0.0771131	-0.203978	0.759382	-0.0989907	0.361605	-0.172309	-0.309944	0.643795	0.460467	0.591292
RHPN1	0.135379	0.64275	0.248925	0.82583	0.393221	0.0644224	0.237368	0.706492	0.118298	0.10913	0.127442	0.459114	0.292403	0.496814	0.553724	0.693151	0.123022	0.360276	0.296882	-0.16818	0.279225	0.26769	0.278933	0.270141	0.293477	0.229006	0.0982927	0.730841	0.310493	0.843502	0.660769	0.0629266	0.663449	0.039833	0.767759	0.23189	0.505448	0.40503	0.271882	0.301572	0.205755	-0.0640124	0.786437	0.101373	0.507577	0.37067	0.0354937	0.225998	-0.027565
FAM180B	0.352966	0.692124	0.23811	0.391929	0.38537	-0.211797	-0.197218	0.363685	-0.119372	-0.0565183	0.193838	0.533757	0.293161	0.245622	0.582692	0.873364	-0.0836524	0.456038	0.0183609	-0.467488	0.278839	0.193929	0.34576	0.00973734	0.339039	0.272347	0.191205	0.684061	0.297356	0.697174	0.370816	0.231667	0.70892	0.0355136	0.664831	0.185994	0.231162	0.4136	0.520319	0.227592	0.109009	-0.224988	0.895398	0.312484	0.432465	-0.0496498	0.0988171	0.239204	0.10249
TMCC3	-0.0207246	0.326969	-0.00284492	0.298638	0.198997	-0.159641	-0.151714	0.482294	-0.0817909	-0.408264	0.343146	0.619767	0.234778	0.280512	0.262404	0.985858	-0.449891	0.0668392	-0.192915	-0.420267	0.434046	-0.161578	-0.0479446	-0.291441	-0.0179133	-0.107364	0.148939	0.587179	-0.112756	0.455225	0.124778	0.423589	0.384305	-0.193511	0.400927	0.143793	0.388709	0.481178	0.491929	-0.0429104	-0.209967	-0.279568	0.952746	0.158726	0.403988	-0.300943	0.0699059	-0.0138191	0.298347
PTCH2	-0.0654555	0.104751	0.428723	0.544009	0.00750607	0.718128	0.919147	0.467631	0.595028	0.528207	0.143446	0.125317	0.278841	0.579401	0.373216	-0.211592	0.276761	0.0980226	0.815386	0.374789	0.362705	0.282348	0.0466238	0.76972	0.182987	0.0869709	0.12855	0.375365	0.0729945	0.355677	0.692287	-0.212389	0.175357	0.222366	-0.0587224	0.559897	0.68336	0.316968	0.0590029	0.112986	0.201142	0.108703	-0.0666296	0.259777	0.493995	0.645049	0.406398	0.445506	-0.0319601
SLX9	0.229486	0.606534	0.252515	0.617323	0.437113	0.0880124	0.148882	0.689406	0.130238	-0.0209863	0.137323	0.502077	0.374004	0.398845	0.576168	0.793852	-0.140708	0.403694	0.298668	-0.321389	0.385835	0.198184	0.266587	0.189528	0.185162	0.161883	0.16158	0.791935	0.10644	0.648412	0.611097	0.242578	0.700396	0.0863925	0.669891	0.382435	0.560102	0.408165	0.473883	0.347169	0.137854	-0.082437	0.860902	0.245345	0.432278	0.10879	0.212523	0.259292	0.160567
GPR20	-0.122975	0.247515	0.0470912	0.338709	0.153787	-0.0115032	-0.0684173	0.588222	0.0726464	-0.362775	0.475414	0.710505	0.343541	0.445107	0.221436	0.985768	-0.383308	-0.0490335	-0.211639	-0.230642	0.43873	-0.134611	-0.133946	-0.291847	0.0411249	-0.113881	0.283723	0.63589	-0.0825219	0.472345	0.0916469	0.481558	0.340727	-0.164954	0.321641	0.228424	0.496922	0.502002	0.545772	-0.197001	-0.332272	-0.211703	0.96859	0.175074	0.530996	-0.285779	0.159308	0.0605504	0.412433
MYO5B	0.711809	0.272808	0.65237	-0.382949	0.470411	0.389828	-0.246731	-0.140361	0.454094	0.576366	0.234721	0.195386	0.644802	0.11093	0.329857	-0.193219	0.46708	0.461969	0.0618152	0.306892	-0.204772	0.682365	0.557541	0.192425	0.70745	0.703619	0.725463	0.253986	0.555214	-0.316914	-0.0698632	0.44943	0.382479	0.814183	-0.0571101	0.520516	-0.228919	-0.266093	0.598862	0.189852	0.142813	0.539014	-0.127606	0.652549	-0.0705954	-0.138136	0.68648	0.695889	0.338707
BRME1	0.854727	0.880733	0.562227	0.438368	0.741063	0.0479073	0.0867341	0.104918	0.0631829	0.637287	-0.248914	0.0106848	0.239156	0.023502	0.753779	-0.0158538	0.530377	0.952259	0.582097	-0.241533	-0.0144055	0.723569	0.918917	0.646413	0.583386	0.757558	0.0379993	0.438271	0.657553	0.37839	0.730655	-0.0737619	0.787554	0.586613	0.751747	0.233313	-0.120618	-0.00917399	0.146869	0.948275	0.856462	0.256496	0.105002	0.372019	-0.110566	0.565432	0.147215	0.438894	-0.415309
PDE6G	-0.0503486	0.196183	0.397839	0.609798	-0.0049813	0.637459	0.852598	0.532889	0.531283	0.491077	0.068842	0.120323	0.289469	0.579417	0.450779	-0.0863534	0.270291	0.141874	0.82847	0.303294	0.307372	0.301274	0.0606518	0.772865	0.209614	0.0948557	0.129272	0.464832	0.106617	0.534092	0.768582	-0.284563	0.308894	0.171024	0.0770513	0.568572	0.746299	0.31399	0.107431	0.100384	0.163136	0.0381568	0.0679235	0.229046	0.594604	0.623514	0.380719	0.482785	0.0127383
FMO3	0.623776	0.165577	0.58462	-0.356514	0.541387	0.428307	-0.279803	-0.051184	0.514799	0.513503	0.264908	0.202717	0.657701	0.129067	0.162507	-0.224412	0.478437	0.352725	-0.0775174	0.433684	-0.26963	0.655839	0.502581	0.0535108	0.641857	0.671789	0.737461	0.191566	0.520928	-0.482087	-0.188027	0.588033	0.26657	0.837304	-0.0495253	0.446446	-0.27619	-0.371035	0.521464	0.190353	0.104102	0.698882	-0.166787	0.522028	-0.222383	-0.160665	0.628022	0.578796	0.359456
CHMP4C	0.132263	0.476576	0.237554	0.473437	0.426643	0.0697681	-0.120463	0.686282	0.194268	-0.104363	0.399499	0.694788	0.517925	0.504774	0.377892	0.914291	-0.0607197	0.194658	-0.124124	-0.101683	0.244571	0.19836	0.158205	-0.146197	0.319014	0.204944	0.428393	0.762581	0.236546	0.538507	0.236539	0.514821	0.583954	0.115151	0.58435	0.309349	0.420704	0.330381	0.597963	0.0328507	-0.141068	0.0464636	0.952743	0.224711	0.465183	-0.120701	0.232334	0.251216	0.378476
CRIP1	0.910073	0.832031	0.814591	0.352247	0.762599	0.379021	0.183545	0.190947	0.398786	0.846516	-0.0138862	0.17725	0.55489	0.263963	0.820237	-0.0725082	0.677054	0.927004	0.645816	0.0519638	0.000206153	0.912562	0.9303	0.744467	0.815963	0.89709	0.402205	0.584859	0.778633	0.312831	0.703982	0.0986395	0.833985	0.828281	0.568423	0.546008	0.0215693	-0.00868707	0.413766	0.78596	0.721477	0.437009	0.0862505	0.62182	0.0778946	0.527743	0.505061	0.75401	-0.147317
COL13A1	0.0614437	0.493727	0.0980987	0.458088	0.248628	-0.176044	-0.0245439	0.454436	-0.114064	-0.260303	0.345181	0.638549	0.186383	0.330822	0.414883	0.963704	-0.318503	0.207287	-0.0490782	-0.476706	0.515738	-0.0776098	0.0852718	-0.109706	0.0899897	-0.00254927	0.070271	0.630161	0.0332798	0.638628	0.29654	0.29956	0.469473	-0.17697	0.505996	0.116418	0.371226	0.606386	0.425565	0.0847333	-0.0126535	-0.340869	0.951644	0.215167	0.474015	-0.0722425	0.0133079	0.0255348	0.0916488
RBM24	-0.180401	0.291174	-0.0731944	0.549268	0.174644	-0.0920058	0.0267772	0.664199	-0.0248363	-0.378456	0.255577	0.540687	0.17682	0.375679	0.205703	0.912851	-0.350369	-0.0160689	-0.0990397	-0.285146	0.380464	-0.161608	-0.114024	-0.206553	-0.0814485	-0.165623	0.0459395	0.577974	-0.115625	0.567383	0.255569	0.290531	0.346296	-0.257477	0.502172	0.0891558	0.507828	0.445799	0.302998	-0.0233973	-0.181407	-0.223045	0.910866	-0.0416491	0.426672	-0.0884886	-0.0520213	-0.0864286	0.207128
PRF1	0.145387	0.126752	0.354245	-0.0226797	0.365691	0.353081	-0.275076	0.516086	0.495653	-0.0188756	0.612801	0.712607	0.777654	0.516266	0.130684	0.632824	0.00648043	-0.0132959	-0.345573	0.294485	0.0679936	0.279504	0.0498647	-0.322154	0.42664	0.265404	0.833412	0.606929	0.224622	-0.000688066	-0.195744	0.825522	0.344575	0.386801	0.110478	0.506303	0.289078	0.0656921	0.809988	-0.268286	-0.434034	0.358333	0.656237	0.400567	0.34258	-0.449791	0.586674	0.437359	0.761187
KDM8	0.0817568	0.475867	0.31981	0.582676	0.29042	0.268911	0.326878	0.739261	0.283128	-0.0261415	0.374247	0.66962	0.463842	0.584707	0.564285	0.844392	-0.231892	0.245699	0.331739	-0.220071	0.587173	0.112426	0.0964116	0.210939	0.174365	0.0519569	0.281834	0.854541	0.00559895	0.65558	0.575271	0.313713	0.598668	0.0443086	0.429316	0.535322	0.754101	0.600275	0.597475	0.116408	-0.031444	-0.157901	0.90899	0.380048	0.658999	0.065474	0.377614	0.341001	0.303611
C1orf210	0.895944	0.679951	0.790509	0.161473	0.875717	0.38657	-0.09098	0.161594	0.477116	0.773112	0.152117	0.272268	0.673536	0.257473	0.572457	-0.0817869	0.73596	0.783893	0.255847	0.256061	-0.1682	0.934313	0.898593	0.413427	0.873982	0.962329	0.60502	0.480442	0.84794	-0.0153647	0.32693	0.435384	0.67888	0.952111	0.490302	0.456145	-0.207707	-0.204173	0.467307	0.665053	0.569554	0.695832	0.0447343	0.572651	-0.134833	0.305465	0.519474	0.681228	0.00736679
PRR15L	0.967426	0.737623	0.767161	0.0377517	0.698689	0.20538	-0.0659567	-0.154234	0.244075	0.80119	0.0305372	0.126308	0.45034	0.0685856	0.683383	-0.182339	0.676161	0.885273	0.39218	0.00622203	-0.0887556	0.850015	0.934628	0.557306	0.835259	0.923194	0.398331	0.352108	0.818184	0.0896945	0.39393	0.147281	0.665688	0.819446	0.390677	0.368492	-0.31432	-0.0844838	0.375425	0.69185	0.694172	0.407526	-0.0759319	0.65148	-0.0919415	0.357031	0.430925	0.664082	-0.19897
CCN4	0.69634	0.25997	0.646797	-0.382128	0.461303	0.39532	-0.25266	-0.130747	0.463079	0.574625	0.238962	0.19583	0.652138	0.1211	0.316216	-0.194321	0.477628	0.443503	0.0475213	0.330431	-0.222455	0.683924	0.544315	0.181485	0.711892	0.701301	0.738586	0.252137	0.560618	-0.314867	-0.0825218	0.450741	0.376079	0.812226	-0.0603702	0.519447	-0.224886	-0.278109	0.598696	0.166589	0.12157	0.548409	-0.127623	0.640448	-0.0619749	-0.14311	0.686321	0.698195	0.354265
KRT18	0.971614	0.737521	0.752292	0.0415198	0.725441	0.202451	-0.113605	-0.115618	0.254831	0.786884	0.00710809	0.117619	0.478307	0.065767	0.665787	-0.166921	0.68967	0.881421	0.359692	0.0316693	-0.147328	0.871254	0.938698	0.522948	0.842227	0.936534	0.426445	0.365312	0.830182	0.0797188	0.378918	0.172837	0.68812	0.837828	0.43098	0.370204	-0.315857	-0.142035	0.388445	0.692587	0.668543	0.452529	-0.057456	0.619848	-0.113231	0.328624	0.431759	0.66753	-0.157426
KRT8	0.853972	0.472895	0.73423	-0.221804	0.607318	0.353672	-0.190037	-0.122606	0.414907	0.700024	0.156455	0.175498	0.620797	0.108377	0.483706	-0.200085	0.585766	0.656736	0.197978	0.224308	-0.188733	0.80165	0.742902	0.345951	0.798706	0.836957	0.647403	0.318441	0.693182	-0.180496	0.117731	0.36785	0.526808	0.877587	0.137426	0.499045	-0.264485	-0.232684	0.545665	0.412018	0.367731	0.547194	-0.110503	0.674873	-0.0948381	0.0527044	0.629401	0.7262	0.158848
COX4I2	0.0710582	0.392853	0.220641	0.541567	0.174413	0.243296	0.520989	0.558878	0.171695	0.00942707	0.0902278	0.345832	0.201882	0.359357	0.53941	0.519466	-0.301264	0.29012	0.600004	-0.337772	0.609806	0.0166897	0.0900507	0.421043	-0.0490169	-0.0708422	-0.0361036	0.634688	-0.184327	0.540495	0.718214	0.0146795	0.471748	-0.0345438	0.317235	0.461042	0.716834	0.547654	0.321921	0.304493	0.171426	-0.25018	0.58373	0.287972	0.470379	0.226046	0.265885	0.222074	0.0549823
GREM1	0.35682	-0.0469423	0.553281	-0.308457	0.428486	0.612848	-0.120971	0.120448	0.692313	0.423495	0.494922	0.365112	0.733716	0.341546	0.00973905	-0.160396	0.387335	0.0826373	-0.156571	0.628771	-0.135473	0.525175	0.256976	-0.0447573	0.550603	0.502396	0.834124	0.21788	0.379484	-0.538697	-0.290081	0.72903	0.0837832	0.760628	-0.234556	0.513944	-0.0804798	-0.259507	0.553381	-0.0565861	-0.117841	0.724052	-0.108851	0.49145	-0.0852987	-0.204202	0.698397	0.537906	0.514946
BGLAP	0.835965	0.510663	0.688472	-0.302692	0.416368	0.237965	-0.207027	-0.201551	0.274578	0.593721	0.123971	0.183998	0.562076	0.0570216	0.607034	-0.0402234	0.392583	0.66782	0.275066	0.000520301	-0.0781016	0.681014	0.660284	0.380563	0.740714	0.71897	0.599851	0.385731	0.577011	0.0197943	0.184327	0.219312	0.611275	0.708323	0.0816861	0.560323	-0.139002	-0.0745699	0.662644	0.287581	0.261454	0.249615	0.0336694	0.768143	0.129611	-0.0685374	0.665327	0.780344	0.232816
DEFB4B	0.110944	-0.291472	0.300106	-0.513834	0.138014	0.4888	-0.256054	0.0835951	0.564803	0.0996744	0.468304	0.323084	0.640105	0.239884	-0.173975	-0.0257354	0.0663162	-0.185986	-0.330391	0.539803	-0.145297	0.234284	-0.0623436	-0.289018	0.295621	0.194194	0.795435	0.133442	0.0722988	-0.582875	-0.49112	0.702238	-0.0656972	0.492907	-0.426692	0.473516	0.0199672	-0.26237	0.595601	-0.374729	-0.466356	0.515754	-0.0236099	0.377525	0.000713243	-0.530502	0.664711	0.410705	0.745357
LCN2	0.969914	0.773797	0.756553	0.12384	0.75079	0.20113	-0.0525989	-0.092076	0.246065	0.812564	-0.0120921	0.108373	0.444567	0.0789274	0.68816	-0.180078	0.716108	0.909283	0.408788	0.0180643	-0.119736	0.878717	0.96535	0.572731	0.83582	0.943889	0.369363	0.368704	0.845793	0.121379	0.443376	0.135108	0.695795	0.828847	0.480196	0.343553	-0.308827	-0.113445	0.330813	0.75568	0.740074	0.448337	-0.063972	0.595216	-0.122645	0.417449	0.386341	0.641417	-0.238808
FOXO6	0.933261	0.774406	0.643549	0.0621466	0.549953	0.0177701	-0.0475817	-0.284409	0.0254977	0.750012	-0.163303	-0.044356	0.228222	-0.0798503	0.723754	-0.219027	0.619607	0.916655	0.488101	-0.182625	-0.0978878	0.748358	0.911127	0.636958	0.728448	0.830068	0.162426	0.257881	0.758218	0.249639	0.492561	-0.139452	0.667671	0.635675	0.429451	0.236245	-0.340338	-0.0450137	0.217816	0.720284	0.763904	0.184921	-0.121594	0.554898	-0.0664742	0.430761	0.255353	0.570627	-0.36958
GPM6A	0.530873	0.0578797	0.522078	-0.522907	0.30428	0.399311	-0.297462	-0.140253	0.462919	0.411603	0.272271	0.185721	0.632121	0.0953093	0.159511	-0.173952	0.31362	0.244736	-0.0682459	0.365521	-0.226174	0.525042	0.338777	0.0299887	0.565691	0.524445	0.758188	0.179477	0.3747	-0.43071	-0.24263	0.493376	0.229821	0.701564	-0.236293	0.518892	-0.169012	-0.30276	0.619873	-0.0377181	-0.0966475	0.500124	-0.134368	0.58173	-0.0451209	-0.33033	0.705628	0.628981	0.512161
DSP	0.725462	0.289018	0.640206	-0.387739	0.462517	0.362487	-0.271795	-0.149382	0.428661	0.572333	0.196182	0.168906	0.635179	0.0870344	0.343364	-0.18937	0.469045	0.478375	0.068566	0.285909	-0.233959	0.688604	0.566919	0.197347	0.709624	0.708053	0.71577	0.255218	0.561513	-0.291736	-0.0574624	0.417859	0.408065	0.805697	-0.0337416	0.515374	-0.233346	-0.285568	0.598805	0.194953	0.142336	0.523882	-0.122453	0.642129	-0.066914	-0.145816	0.67628	0.702649	0.340725
ICAM1	-0.135998	0.212419	0.327948	0.532515	0.291025	0.441737	0.390828	0.773344	0.473763	-0.0693232	0.732007	0.877287	0.529419	0.763797	0.280142	0.792332	-0.215367	-0.0438905	0.0548037	0.069608	0.689956	0.0132818	-0.0820388	-0.0143125	0.147312	-0.0197593	0.412801	0.736323	-0.0299052	0.357204	0.260587	0.628411	0.262217	0.0727412	0.174033	0.467595	0.685647	0.653774	0.555475	-0.0928449	-0.174151	0.0218034	0.826784	0.355589	0.581304	0.0229547	0.392011	0.208719	0.354885
P4HA3	0.0509493	0.439045	0.0305277	0.369066	0.209208	-0.204602	-0.0891778	0.443344	-0.145567	-0.343542	0.269174	0.575956	0.175171	0.250837	0.378219	0.970453	-0.419218	0.18187	-0.0626109	-0.521665	0.474739	-0.128606	0.0370377	-0.160863	0.0070005	-0.0678227	0.0592662	0.609255	-0.0699279	0.575266	0.263327	0.297549	0.46469	-0.205989	0.47486	0.135588	0.390306	0.54033	0.451768	0.065143	-0.0809905	-0.359094	0.948481	0.188593	0.43395	-0.187225	0.0327959	0.00886167	0.174882
BICDL1	0.878991	0.523952	0.763268	-0.134911	0.695022	0.379023	-0.15332	-0.054136	0.44425	0.72337	0.170133	0.211223	0.64221	0.145526	0.508211	-0.17677	0.611889	0.699049	0.220159	0.227731	-0.158762	0.836135	0.792587	0.366723	0.813332	0.872574	0.639852	0.360526	0.721447	-0.171672	0.169597	0.412242	0.558505	0.914986	0.212894	0.500625	-0.253759	-0.216869	0.534265	0.498154	0.435571	0.597604	-0.0793714	0.669952	-0.125588	0.114499	0.618757	0.71479	0.11722
PAK6	0.866394	0.66259	0.878047	0.0463722	0.543389	0.421823	0.18117	-0.0929537	0.416256	0.877649	0.192952	0.237139	0.548713	0.260269	0.75896	-0.181463	0.636009	0.797455	0.563083	0.10367	0.0971781	0.826587	0.812833	0.709645	0.860779	0.850101	0.507057	0.452145	0.748694	0.179155	0.479618	0.113613	0.64127	0.805265	0.182584	0.584057	-0.0633979	0.101359	0.499968	0.510634	0.57821	0.317583	-0.0555278	0.813892	0.186713	0.391987	0.632322	0.825573	-0.0764922
TCAP	-0.0309215	0.391596	0.0288851	0.414077	0.162729	-0.138207	-0.0302468	0.518969	-0.0796273	-0.341939	0.312513	0.606747	0.211251	0.334257	0.353927	0.981789	-0.404949	0.107369	-0.0568894	-0.436146	0.4785	-0.137017	-0.0312724	-0.156349	0.00761547	-0.101935	0.101401	0.636709	-0.0807871	0.613188	0.267816	0.296031	0.442704	-0.225034	0.445874	0.172499	0.476358	0.556226	0.461557	-0.0214369	-0.155315	-0.348167	0.968937	0.167944	0.515377	-0.172296	0.0588819	0.0310201	0.2319
CSF3	-0.040352	0.35732	0.0611975	0.402038	0.236113	-0.101585	-0.0592197	0.52539	-0.0230037	-0.336288	0.441766	0.700145	0.256613	0.386226	0.281011	0.984985	-0.364556	0.0643015	-0.179966	-0.352837	0.496074	-0.12527	-0.0256218	-0.247798	0.0463818	-0.0637659	0.166618	0.614746	-0.0341113	0.503886	0.155049	0.448384	0.368728	-0.168538	0.416176	0.136728	0.399202	0.558319	0.466356	-0.0368506	-0.159201	-0.249473	0.962037	0.17868	0.449528	-0.185786	0.0601811	-0.0059266	0.230988
SFN	0.96691	0.819228	0.733131	0.186698	0.743748	0.148496	-0.0209041	-0.0969104	0.185013	0.804812	-0.0563229	0.0848123	0.380327	0.0586908	0.721434	-0.164373	0.706323	0.940964	0.451762	-0.050942	-0.0908596	0.857142	0.980685	0.61062	0.810114	0.928448	0.28521	0.367267	0.842058	0.195565	0.507402	0.0632189	0.715015	0.778264	0.53438	0.299082	-0.305348	-0.0715429	0.276206	0.804517	0.798152	0.386802	-0.0479286	0.566253	-0.114397	0.478238	0.319643	0.603155	-0.321722
TENM1	0.527834	0.0605438	0.55834	-0.424267	0.414684	0.492442	-0.239682	-0.0255909	0.564576	0.458165	0.302425	0.218182	0.691065	0.168242	0.131993	-0.201671	0.383758	0.246296	-0.062365	0.469303	-0.234839	0.585194	0.372936	0.0390143	0.585619	0.569218	0.790336	0.20834	0.410701	-0.485515	-0.217495	0.58067	0.224421	0.782515	-0.179008	0.534618	-0.151915	-0.341591	0.592104	0.0373825	-0.0476972	0.641177	-0.147062	0.547285	-0.110808	-0.254213	0.714772	0.620126	0.499055
C1QL3	-0.0721968	0.304865	-0.00230032	0.341682	0.184558	-0.140299	-0.200767	0.53125	-0.0315606	-0.362338	0.368158	0.625985	0.285728	0.354669	0.209516	0.965992	-0.301713	-0.00017659	-0.281386	-0.260492	0.293934	-0.0938952	-0.0678984	-0.33247	0.0773002	-0.0530968	0.237314	0.582843	0.010202	0.508543	0.0662112	0.416946	0.379704	-0.171616	0.436645	0.113728	0.367782	0.398173	0.47499	-0.150114	-0.287404	-0.196618	0.947262	0.0879925	0.454009	-0.274396	0.0465133	0.0196409	0.344275
RAPGEFL1	0.912578	0.588231	0.745598	-0.110142	0.660138	0.287638	-0.173221	-0.128002	0.350001	0.760766	0.0763717	0.129906	0.563431	0.0867446	0.555986	-0.213809	0.673644	0.755974	0.260023	0.171037	-0.215647	0.857725	0.839732	0.426249	0.842345	0.903724	0.563661	0.326072	0.786226	-0.0666312	0.22265	0.268449	0.599867	0.87639	0.27336	0.434345	-0.308629	-0.22827	0.465647	0.528577	0.49894	0.529931	-0.111488	0.637608	-0.110334	0.183635	0.53789	0.712559	0.0197776
COLQ	-0.131094	-0.0565859	0.419797	0.384667	-0.0777475	0.800407	0.86542	0.426866	0.684845	0.521664	0.202543	0.112753	0.345536	0.592114	0.252094	-0.298994	0.289326	-0.0355911	0.717748	0.533226	0.273916	0.273212	-0.0539881	0.685227	0.190489	0.0589088	0.255491	0.306412	0.0446799	0.207228	0.527675	-0.147781	0.0671834	0.258396	-0.233189	0.606079	0.66861	0.218055	0.107574	-0.062144	0.0380776	0.186362	-0.160126	0.266572	0.492523	0.520814	0.497696	0.488583	0.122995
GNLY	-0.0350735	0.329332	0.163668	0.43353	0.30269	0.098382	-0.00889045	0.682423	0.190846	-0.243316	0.517524	0.768012	0.449473	0.533158	0.285793	0.965815	-0.268119	0.0394022	-0.15	-0.148341	0.444511	-0.00236934	-0.0211699	-0.214952	0.145621	0.0086652	0.360814	0.718757	0.0236685	0.463808	0.169411	0.564368	0.416177	-0.0230566	0.403345	0.301692	0.512451	0.487225	0.581963	-0.0814014	-0.235425	-0.07315	0.973818	0.22936	0.506161	-0.187496	0.228474	0.138058	0.397674
BCL7C	0.374651	0.66565	0.256262	0.59743	0.357923	0.0482837	0.312828	0.441229	0.0119063	0.200227	-0.250353	0.0915745	0.143457	0.154202	0.687495	0.370608	0.00021405	0.604093	0.673319	-0.411374	0.268605	0.2857	0.422102	0.55533	0.145202	0.21727	-0.115785	0.597746	0.124526	0.662735	0.860473	-0.200541	0.72221	0.112535	0.65815	0.338104	0.456939	0.275084	0.204415	0.607773	0.44789	-0.143744	0.470001	0.204665	0.285709	0.383789	0.124003	0.291004	-0.147791
SCN11A	0.870112	0.648387	0.858476	0.189688	0.803788	0.53307	0.15134	0.171759	0.5661	0.851159	0.164702	0.257358	0.668337	0.314284	0.646391	-0.172809	0.687429	0.792722	0.484688	0.257303	-0.0093423	0.913438	0.865997	0.604192	0.824875	0.903534	0.565404	0.505565	0.749503	-0.00268708	0.471328	0.349242	0.655525	0.952991	0.363658	0.587581	-0.0538009	-0.0886578	0.466896	0.687147	0.618816	0.63429	-0.029877	0.667987	-0.0468624	0.407931	0.623521	0.749712	-0.0195287
MT1X	-0.0197455	0.291597	0.407804	0.444503	0.201019	0.489162	0.361001	0.774323	0.511066	0.0163959	0.606774	0.80249	0.650207	0.754565	0.466371	0.806626	-0.199744	0.0624147	0.240683	0.0429905	0.593724	0.129793	-0.0416881	0.145072	0.25477	0.0387977	0.543032	0.872682	0.00238838	0.523388	0.402098	0.478819	0.483179	0.128241	0.175436	0.694929	0.840625	0.596996	0.755229	-0.157705	-0.265769	-0.0511823	0.874447	0.490594	0.788304	-0.057531	0.593669	0.475826	0.552489
CHAC1	-0.0912692	0.285384	0.43118	0.696344	0.285466	0.59033	0.681042	0.813567	0.565146	0.146716	0.60561	0.750617	0.50269	0.815288	0.42345	0.590775	-0.0807822	0.0729123	0.402387	0.118275	0.730078	0.124922	0.00592775	0.319506	0.179566	0.0327832	0.321543	0.764164	0.00977932	0.473052	0.548002	0.401198	0.33057	0.135785	0.197763	0.572215	0.811942	0.680556	0.450391	0.06369	0.018008	0.0305433	0.67577	0.385317	0.638248	0.311872	0.433914	0.317961	0.204892
NME4	0.0266002	0.372048	0.209098	0.653612	0.0914736	0.308419	0.639404	0.577942	0.219662	0.178574	-0.108416	0.122526	0.151357	0.36664	0.535182	0.268138	-0.0659587	0.28299	0.765248	-0.157311	0.397844	0.131934	0.102948	0.612548	0.000739839	-0.0237059	-0.0902631	0.559617	-0.0787669	0.646838	0.849423	-0.260699	0.480714	-0.0145543	0.359126	0.447097	0.74519	0.385086	0.143807	0.307409	0.221467	-0.178194	0.379551	0.147311	0.495339	0.444175	0.207204	0.286185	-0.0283151
ITPKA	-0.0920928	0.166992	0.363482	0.634485	-0.00127955	0.635905	0.855975	0.563279	0.532855	0.461133	0.066507	0.116151	0.274054	0.583306	0.405874	-0.085792	0.261087	0.104999	0.799196	0.323541	0.29854	0.277009	0.0327024	0.739256	0.174401	0.0674047	0.109444	0.446975	0.0838019	0.512219	0.750095	-0.269134	0.275197	0.151816	0.0861772	0.537554	0.747015	0.29871	0.0711522	0.0973562	0.151832	0.058824	0.0658203	0.177964	0.565157	0.627267	0.346147	0.436628	0.0063742
CYP1A1	-0.0130074	0.380148	0.00105325	0.355683	0.167655	-0.190254	-0.0819102	0.458784	-0.131219	-0.382456	0.301665	0.591875	0.173798	0.270776	0.328723	0.980519	-0.450679	0.112956	-0.0998958	-0.490804	0.48445	-0.172233	-0.0273418	-0.202744	-0.0269335	-0.116897	0.0688874	0.593936	-0.111286	0.553737	0.219602	0.316889	0.41402	-0.238998	0.427859	0.130836	0.414322	0.548304	0.449356	-0.00122654	-0.142651	-0.365404	0.952684	0.166299	0.451291	-0.21866	0.0319922	-0.0151036	0.211084
PLAAT3	0.043075	0.457248	0.293216	0.511371	0.17361	0.186202	0.166982	0.673471	0.238136	-0.0208379	0.389368	0.662651	0.486941	0.598555	0.532266	0.870577	-0.118881	0.170936	0.18685	-0.133725	0.411905	0.146197	0.0495646	0.12725	0.294247	0.0922952	0.386867	0.830275	0.138914	0.771822	0.453799	0.244409	0.613933	0.00318823	0.420396	0.486578	0.69245	0.530591	0.636289	-0.101021	-0.189718	-0.193129	0.935011	0.346164	0.788262	-0.0109657	0.352997	0.404953	0.396545
NKX3-2	0.659703	0.445302	0.644378	-0.0836206	0.652989	0.338387	-0.353529	0.217729	0.482424	0.452645	0.383724	0.479383	0.802614	0.332997	0.383244	0.236243	0.473525	0.456449	-0.121038	0.306462	-0.183213	0.720454	0.569168	0.0163253	0.798968	0.750241	0.849262	0.531854	0.673873	-0.0528922	-0.0283875	0.665089	0.575606	0.781407	0.286377	0.507271	-0.0924704	-0.173954	0.738156	0.16921	0.0479212	0.585346	0.311547	0.575344	0.0836243	-0.163854	0.628134	0.673028	0.454266
BASP1	0.903634	0.567512	0.752618	-0.131667	0.649409	0.302975	-0.160659	-0.142085	0.361373	0.758551	0.105281	0.145043	0.565913	0.0931314	0.545629	-0.220435	0.658726	0.740448	0.254492	0.17672	-0.189888	0.843647	0.825509	0.420683	0.835867	0.892672	0.571331	0.317235	0.770687	-0.0926516	0.203523	0.286511	0.574683	0.876804	0.234551	0.442026	-0.308552	-0.210335	0.473359	0.511952	0.489692	0.526084	-0.121831	0.656501	-0.108631	0.172726	0.55324	0.711303	0.0257611
RSPO1	0.906565	0.555297	0.726565	-0.202772	0.58263	0.262126	-0.183846	-0.19912	0.309501	0.716708	0.074625	0.118313	0.536422	0.0405121	0.564666	-0.202244	0.581607	0.741009	0.273234	0.10102	-0.169889	0.796399	0.796291	0.421109	0.797594	0.84706	0.549276	0.308166	0.710862	-0.0801273	0.200635	0.241507	0.580967	0.829851	0.188165	0.458145	-0.292768	-0.189014	0.503988	0.478082	0.454594	0.4401	-0.112955	0.68498	-0.0765544	0.108431	0.569689	0.719823	0.0545927
S100A14	0.723214	0.807368	0.732427	0.594176	0.652019	0.406011	0.434525	0.316298	0.386507	0.83234	-0.0764705	0.124657	0.425385	0.346133	0.819024	-0.0905076	0.661508	0.847214	0.806058	0.0562983	0.093359	0.818072	0.821815	0.873572	0.69042	0.758281	0.218906	0.583592	0.690949	0.497463	0.884099	-0.100737	0.783205	0.665724	0.609552	0.496107	0.195152	0.105683	0.232519	0.784333	0.759903	0.327936	0.086245	0.479739	0.186688	0.74126	0.374821	0.660346	-0.285051
ANKRD2	0.412551	0.613325	0.639396	0.696039	0.42673	0.559485	0.711978	0.50641	0.490294	0.692554	0.0231295	0.199568	0.407302	0.513515	0.748561	-0.00312735	0.441238	0.600266	0.912563	0.107188	0.310821	0.601568	0.522396	0.897819	0.475952	0.469708	0.175877	0.639885	0.409046	0.576105	0.95064	-0.144437	0.64902	0.464759	0.431643	0.604657	0.541803	0.297714	0.232649	0.565352	0.553429	0.180291	0.173223	0.432222	0.417548	0.736189	0.426609	0.61251	-0.161033
HOGA1	0.292507	0.435892	0.599388	0.592228	0.302864	0.676242	0.748131	0.54408	0.594172	0.644898	0.0449294	0.173918	0.46158	0.546037	0.648092	-0.0581864	0.369729	0.447437	0.906466	0.230908	0.28353	0.542525	0.367519	0.860127	0.401429	0.361248	0.257321	0.613312	0.279969	0.472921	0.872882	-0.122542	0.554903	0.448138	0.258308	0.70178	0.653643	0.241173	0.281015	0.39683	0.371225	0.207944	0.117899	0.42066	0.465942	0.624569	0.533608	0.648865	0.0180833
KRT19	0.935201	0.62119	0.758351	-0.098304	0.662546	0.27546	-0.142007	-0.14421	0.326872	0.764335	0.0715172	0.135315	0.542356	0.0762737	0.598601	-0.199565	0.644949	0.793237	0.306581	0.11146	-0.16049	0.846532	0.859272	0.464014	0.831555	0.898958	0.528754	0.34012	0.770813	-0.040422	0.266959	0.246851	0.619005	0.864088	0.27896	0.441952	-0.296549	-0.178399	0.467839	0.567211	0.540754	0.484884	-0.0984518	0.668499	-0.098616	0.204529	0.537664	0.712629	-0.0169666
S100A2	0.751259	0.751182	0.793937	0.41882	0.524785	0.43732	0.476758	0.128984	0.384918	0.889802	-0.0201763	0.110944	0.406657	0.311544	0.851029	-0.188795	0.631186	0.841027	0.864355	0.0335513	0.16823	0.790662	0.796711	0.943975	0.713737	0.744171	0.243821	0.52075	0.662533	0.447518	0.839392	-0.159875	0.720329	0.666735	0.395667	0.558152	0.17026	0.177811	0.283598	0.691439	0.737533	0.227485	-0.0226071	0.627337	0.254899	0.699381	0.473283	0.740221	-0.275161
S100A5	0.338738	0.364739	0.801133	0.506255	0.402596	0.832563	0.797434	0.376762	0.764997	0.873272	0.363802	0.324915	0.540161	0.675238	0.544023	-0.277632	0.639309	0.402134	0.750484	0.505938	0.323531	0.664613	0.452724	0.837367	0.621191	0.550901	0.417123	0.477834	0.518079	0.229099	0.646507	0.0850194	0.343178	0.653936	0.0534463	0.643978	0.395637	0.272369	0.23835	0.349311	0.467174	0.424317	-0.107424	0.557941	0.361121	0.746586	0.585917	0.676957	-0.10562
GZMH	0.0180812	0.227541	0.229535	0.171218	0.250237	0.171026	-0.152348	0.574892	0.281428	-0.211952	0.603332	0.790922	0.588383	0.522297	0.23894	0.909783	-0.246934	-0.0135851	-0.258121	-0.0292218	0.343884	0.0523061	-0.0488809	-0.297108	0.244957	0.0620115	0.581048	0.694699	0.0543534	0.306101	-0.0185805	0.676251	0.388259	0.0873226	0.21668	0.415996	0.456868	0.382056	0.755577	-0.255157	-0.403793	0.00235525	0.910205	0.357071	0.527973	-0.393523	0.414943	0.28193	0.618813
LOXL4	0.648622	0.902829	0.635342	0.605473	0.773974	0.150408	0.135842	0.461851	0.212501	0.391449	0.317623	0.632904	0.495848	0.441779	0.796471	0.622357	0.250482	0.760997	0.342545	-0.274206	0.424832	0.552024	0.710052	0.382499	0.607513	0.620565	0.301319	0.810793	0.565323	0.577417	0.641168	0.380399	0.823996	0.462558	0.745678	0.390547	0.212481	0.455606	0.526558	0.650205	0.546065	0.120848	0.712385	0.559271	0.296586	0.355616	0.305988	0.449461	-0.115347
WWC1	0.76209	0.34492	0.659293	-0.311042	0.52321	0.340694	-0.26368	-0.16151	0.414285	0.648358	0.158979	0.130883	0.603194	0.083128	0.351147	-0.256253	0.592931	0.528968	0.0767426	0.319661	-0.291653	0.755246	0.644866	0.239053	0.765404	0.784963	0.676113	0.223549	0.667151	-0.265075	-0.025255	0.374322	0.418936	0.841701	0.0489326	0.444395	-0.313398	-0.32389	0.508272	0.27651	0.24644	0.579063	-0.178406	0.594978	-0.124462	-0.0279694	0.60053	0.682631	0.224483
SNCG	-0.237548	-0.0336506	0.169028	0.45495	-0.213504	0.546986	0.82577	0.442145	0.410295	0.270506	-0.0475479	-0.0352937	0.113183	0.414064	0.259268	-0.147258	0.0313201	-0.0479266	0.766609	0.226879	0.298306	0.0560774	-0.162648	0.644565	-0.0734323	-0.165695	-0.0323212	0.284031	-0.183529	0.385399	0.642358	-0.370252	0.10755	-0.028788	-0.100063	0.471486	0.756508	0.261894	-0.0116113	-0.0212696	0.0189657	-0.0859162	-0.0323113	0.0783914	0.504169	0.466641	0.283886	0.29808	0.0503555
NDRG4	-0.0966765	0.356948	-0.0355314	0.469691	0.150616	-0.154913	-0.0473899	0.571931	-0.0845563	-0.363917	0.256989	0.554383	0.186156	0.335455	0.28767	0.957884	-0.360562	0.052425	-0.0964931	-0.371855	0.38479	-0.140339	-0.0672479	-0.191667	-0.0175109	-0.122222	0.0766899	0.604312	-0.0715507	0.627763	0.253863	0.260494	0.417853	-0.254748	0.496252	0.113882	0.473441	0.479415	0.38567	-0.0433299	-0.184821	-0.30479	0.950533	0.0504871	0.48834	-0.145643	-0.0136391	-0.0178571	0.226909
MKX	-0.0931258	0.315969	0.0118579	0.469855	0.243894	-0.0564728	-0.135705	0.665692	0.0588675	-0.298449	0.320396	0.594659	0.333992	0.423975	0.203137	0.918382	-0.195931	0.00017462	-0.226078	-0.139932	0.216289	-0.0137176	-0.0463745	-0.276837	0.105222	-0.0131596	0.258551	0.620174	0.0616423	0.538578	0.143873	0.401874	0.415124	-0.115994	0.526482	0.140246	0.428099	0.319622	0.429115	-0.102304	-0.262662	-0.0785787	0.927909	0.0123164	0.443214	-0.171893	0.0439431	0.0445701	0.346289
RORC	0.558081	0.0839552	0.542682	-0.497181	0.345026	0.415269	-0.284504	-0.119426	0.47923	0.434303	0.264899	0.188034	0.646672	0.102217	0.178578	-0.179022	0.332082	0.276055	-0.0452723	0.367846	-0.22414	0.552866	0.371776	0.0518416	0.579321	0.550369	0.760119	0.196984	0.391587	-0.433297	-0.213979	0.505546	0.252943	0.73145	-0.20591	0.530777	-0.16778	-0.309309	0.620497	0.00861303	-0.0608938	0.528396	-0.133993	0.588506	-0.0638727	-0.304653	0.713208	0.63871	0.498025
SLC7A2	0.535115	0.551075	0.436795	0.0492331	0.578164	0.067929	-0.372902	0.34368	0.19915	0.0571189	0.381237	0.63458	0.641266	0.281924	0.478175	0.735008	-0.00584663	0.448096	-0.141285	-0.17616	0.149396	0.389773	0.423363	-0.126332	0.507574	0.458145	0.607177	0.696865	0.358648	0.213647	0.0922386	0.662861	0.669581	0.422114	0.444107	0.434112	0.121558	0.163517	0.808954	0.184908	-0.0196179	0.174255	0.758619	0.5345	0.240029	-0.324235	0.473575	0.454077	0.447392
GHSR	0.0570547	-0.264597	0.386012	-0.231809	0.29765	0.695546	-0.0201451	0.336067	0.767612	0.218993	0.543167	0.403484	0.724559	0.44282	-0.174787	-0.0683899	0.204735	-0.188129	-0.223615	0.727985	-0.0803065	0.330746	-0.021256	-0.180341	0.328142	0.248778	0.811886	0.221416	0.13433	-0.572585	-0.347189	0.785382	-0.0688678	0.596169	-0.31883	0.521713	0.14003	-0.236004	0.513938	-0.244366	-0.348931	0.710969	-0.0271841	0.321344	-0.0206673	-0.287174	0.6709	0.406209	0.667355
PENK	0.333115	0.239805	0.54372	-0.0467799	0.509485	0.421125	-0.191635	0.393485	0.545009	0.156429	0.722871	0.788823	0.810198	0.52936	0.247037	0.542053	0.0953952	0.156228	-0.25532	0.25969	0.209643	0.387753	0.235306	-0.192562	0.553527	0.423074	0.852813	0.612207	0.341719	-0.0858637	-0.149511	0.903914	0.362997	0.546761	0.0719269	0.547434	0.171279	0.166729	0.837629	-0.0907356	-0.210545	0.408608	0.568741	0.59948	0.268603	-0.331152	0.664715	0.506399	0.608639
TNFRSF12A	0.541169	0.760905	0.559333	0.722685	0.521112	0.30462	0.476734	0.399637	0.277338	0.694009	-0.182903	0.0522919	0.2881	0.332383	0.75912	-0.0202232	0.574618	0.736379	0.808142	-0.000631143	0.0806835	0.678656	0.680972	0.840692	0.537018	0.593459	0.0603578	0.557459	0.578196	0.65049	0.938298	-0.257423	0.745687	0.457714	0.677808	0.388099	0.295597	0.133177	0.100145	0.714781	0.689682	0.195378	0.151966	0.288114	0.254007	0.776192	0.208012	0.525255	-0.326339
CLDN4	-0.171922	-0.113968	0.497937	0.421283	0.283135	0.850694	0.652072	0.5564	0.846212	0.437256	0.723203	0.563562	0.540724	0.812446	-0.0197128	-0.0897136	0.389634	-0.189268	0.136645	0.777099	0.348714	0.294926	-0.0236488	0.217359	0.331895	0.201765	0.510497	0.307592	0.234654	-0.134105	0.0853577	0.529053	-0.143316	0.432556	-0.193983	0.420038	0.383015	0.253222	0.170699	-0.100602	-0.00470703	0.552688	0.000835305	0.258941	0.247676	0.410701	0.440101	0.287654	0.148895
C4BPA	0.967658	0.780448	0.750773	0.142642	0.759167	0.1932	-0.0467192	-0.0882296	0.238112	0.813073	-0.019921	0.10309	0.431772	0.0764963	0.686013	-0.183181	0.722599	0.913284	0.410286	0.0141841	-0.119771	0.877825	0.971161	0.575299	0.830933	0.944707	0.351742	0.363474	0.849795	0.12645	0.451442	0.12836	0.693545	0.82419	0.496113	0.32714	-0.315932	-0.11293	0.310698	0.77203	0.757122	0.450268	-0.0667469	0.580586	-0.134364	0.435947	0.366417	0.626295	-0.261459
OXTR	0.110666	-0.224516	0.387541	-0.286782	0.324895	0.614068	-0.125345	0.269049	0.703111	0.193526	0.567757	0.435266	0.7175	0.399753	-0.166035	-0.015661	0.196195	-0.154699	-0.307698	0.665882	-0.088663	0.330325	0.0173402	-0.24552	0.362414	0.284282	0.823777	0.213321	0.175339	-0.579162	-0.409229	0.827374	-0.0511994	0.59736	-0.296965	0.475892	0.0513916	-0.228851	0.54599	-0.241246	-0.342301	0.687387	0.0109274	0.349804	-0.0455965	-0.345779	0.64796	0.391944	0.657424
GJB3	0.961286	0.808319	0.737648	0.208584	0.771167	0.18131	0.018687	-0.0702018	0.211753	0.807799	-0.051737	0.0875375	0.382349	0.0681215	0.710539	-0.1816	0.696058	0.940491	0.472653	-0.0400424	-0.0642366	0.853741	0.982444	0.621526	0.785907	0.920071	0.271821	0.366652	0.817671	0.157913	0.522676	0.0879736	0.697708	0.793493	0.53166	0.307216	-0.291839	-0.0687886	0.259323	0.841969	0.823973	0.416227	-0.0636494	0.560877	-0.148239	0.500478	0.324126	0.585907	-0.336549
UNC5C	0.321963	-0.133674	0.421294	-0.50885	0.255509	0.484845	-0.277572	0.00581517	0.561082	0.277636	0.369349	0.247694	0.669044	0.184707	-0.0334376	-0.132529	0.229612	0.0202261	-0.209966	0.516599	-0.22647	0.413256	0.146904	-0.136218	0.44512	0.382409	0.808615	0.154432	0.242181	-0.549633	-0.379117	0.631145	0.0752091	0.641059	-0.32314	0.507502	-0.0792435	-0.334369	0.602199	-0.194906	-0.283293	0.581771	-0.105093	0.460599	-0.0574642	-0.421479	0.700103	0.528435	0.648452
VSTM5	0.161139	-0.128138	0.410866	-0.215727	0.416911	0.5902	-0.122943	0.34227	0.683849	0.151061	0.600537	0.526294	0.743451	0.422306	-0.0891635	0.126933	0.120199	-0.0797036	-0.29005	0.554154	0.0163351	0.323	0.067344	-0.252001	0.353318	0.292595	0.810542	0.314519	0.156886	-0.527307	-0.340361	0.903373	0.0331806	0.597543	-0.198722	0.500767	0.0966526	-0.140414	0.609343	-0.147546	-0.290164	0.656567	0.150101	0.395265	-0.0350331	-0.353749	0.655578	0.380331	0.64766
DOK7	0.377666	0.59676	0.260557	0.520208	0.478191	0.0816607	0.260164	0.450958	0.0589325	0.111063	-0.0996323	0.217228	0.188092	0.155248	0.581456	0.42389	-0.107359	0.559375	0.51915	-0.411122	0.371949	0.224951	0.409661	0.390833	0.0849637	0.195821	-0.0718111	0.574455	0.0459961	0.420529	0.705504	0.0696128	0.61384	0.168423	0.591435	0.317227	0.379967	0.296994	0.247931	0.648058	0.443431	-0.0421885	0.49223	0.241659	0.124695	0.269689	0.152573	0.191574	-0.115243
EGFL8	-0.188065	0.167452	0.165169	0.55484	-0.111793	0.400191	0.72602	0.591507	0.291647	0.0559595	0.090112	0.247403	0.173764	0.475056	0.427309	0.340477	-0.239519	0.0473696	0.692115	-0.0936535	0.554322	-0.0475897	-0.144899	0.515344	-0.103007	-0.217548	-0.0202327	0.54936	-0.259068	0.600924	0.715601	-0.188696	0.309595	-0.141062	0.0950639	0.515292	0.893797	0.532545	0.225199	0.0186907	-0.0215319	-0.290072	0.427317	0.194994	0.665677	0.304697	0.29665	0.269577	0.136208
PRRT1	-0.136589	0.317201	-0.00901789	0.456576	0.0760743	-0.0711147	0.0429106	0.601313	-0.0216314	-0.349954	0.283844	0.569256	0.223249	0.388863	0.317647	0.954504	-0.40198	0.0180818	-0.0110427	-0.346379	0.442452	-0.157361	-0.125807	-0.128105	-0.031536	-0.168983	0.113271	0.644812	-0.129896	0.656779	0.298341	0.230768	0.418732	-0.266762	0.412145	0.215284	0.592286	0.529784	0.441791	-0.112991	-0.245663	-0.346529	0.955572	0.106027	0.593766	-0.155131	0.0765388	0.0509749	0.300121
TOMM7	0.393302	0.685969	0.279028	0.626487	0.429329	0.0585338	0.308056	0.465577	0.0314882	0.205429	-0.201492	0.142297	0.163772	0.177868	0.678788	0.392263	0.0156489	0.618616	0.63629	-0.400998	0.294257	0.30155	0.454065	0.527428	0.162726	0.247908	-0.102913	0.609797	0.151279	0.62761	0.843517	-0.123432	0.716331	0.146876	0.688042	0.321064	0.425724	0.287744	0.204653	0.65172	0.484564	-0.0949511	0.489206	0.211243	0.241665	0.399206	0.115497	0.267748	-0.172379
KCNA4	0.0892559	-0.0641843	0.365242	0.148493	0.177273	0.749631	0.537411	0.433101	0.675105	0.392519	0.0305852	0.01329	0.452749	0.348483	0.170982	-0.291934	0.153642	0.0862209	0.57706	0.449493	0.0841194	0.333538	0.0734078	0.478209	0.109301	0.12592	0.334744	0.293166	-0.0576827	-0.174602	0.388367	0.127362	0.149204	0.451884	-0.137865	0.648786	0.512821	-0.106118	0.232879	0.166495	0.0466717	0.432415	-0.174702	0.250221	0.100236	0.213593	0.58813	0.456653	0.306551
UPK3B	0.757692	0.321262	0.642718	-0.404583	0.431938	0.322595	-0.254616	-0.215133	0.373634	0.585724	0.15472	0.131565	0.584921	0.0409128	0.391123	-0.208191	0.450796	0.523987	0.127063	0.21069	-0.20566	0.676694	0.590034	0.251867	0.700675	0.704266	0.660251	0.240052	0.552705	-0.254381	-0.0137191	0.342338	0.425894	0.780114	-0.0415046	0.507612	-0.245641	-0.251374	0.582686	0.225622	0.189335	0.451674	-0.143225	0.669529	-0.0543935	-0.123368	0.662104	0.707684	0.286423
CYP21A2	0.498857	0.813628	0.444262	0.719448	0.47018	0.121676	0.28382	0.454245	0.131895	0.497864	-0.198147	0.120209	0.280957	0.302506	0.775861	0.258186	0.431245	0.705512	0.662155	-0.155725	0.0556711	0.585778	0.611759	0.672806	0.498647	0.518545	0.0674397	0.64706	0.535556	0.815424	0.892746	-0.242238	0.84542	0.311682	0.798142	0.341377	0.341023	0.170356	0.204002	0.60439	0.534314	0.0470988	0.408307	0.236939	0.367591	0.59383	0.144643	0.483239	-0.205285
EVPL	0.918818	0.596517	0.6457	-0.189221	0.535378	0.122793	-0.241485	-0.278175	0.168808	0.701089	-0.0812297	-0.0151131	0.413373	-0.0737281	0.573146	-0.243569	0.607285	0.780536	0.288689	0.015468	-0.265004	0.781615	0.821563	0.442345	0.768362	0.84016	0.424056	0.237647	0.732025	0.00235056	0.236758	0.0762147	0.604674	0.754217	0.267363	0.347364	-0.36639	-0.244511	0.393962	0.520021	0.508383	0.364509	-0.156087	0.589561	-0.112668	0.150385	0.438784	0.663245	-0.0496964
OSBP2	0.874385	0.912564	0.825285	0.381135	0.704427	0.320561	0.130105	0.280489	0.359648	0.726413	0.129967	0.38512	0.634324	0.3726	0.929607	0.252049	0.531751	0.908846	0.588196	-0.07711	0.1412	0.842864	0.86148	0.669704	0.848595	0.842309	0.49359	0.773724	0.753538	0.535394	0.719951	0.163561	0.955399	0.720786	0.609552	0.626331	0.177295	0.190931	0.624239	0.633527	0.565537	0.252939	0.398833	0.726571	0.342298	0.390912	0.570065	0.817272	0.0044524
GRAMD2A	0.852855	0.489256	0.748805	-0.156036	0.663013	0.38636	-0.176507	-0.0553833	0.457687	0.725882	0.16209	0.19009	0.652705	0.149838	0.476448	-0.201113	0.640194	0.661159	0.192931	0.280182	-0.216082	0.843402	0.765444	0.348057	0.824617	0.870217	0.668015	0.341885	0.73412	-0.176364	0.135814	0.398412	0.54238	0.91385	0.193251	0.498608	-0.256845	-0.26087	0.531139	0.442984	0.386976	0.616707	-0.101355	0.644609	-0.113205	0.0964879	0.6218	0.727239	0.153715
CAMSAP3	0.962129	0.733702	0.739458	0.0387365	0.63671	0.196863	0.0166617	-0.189039	0.202062	0.798836	-0.0643002	0.0385325	0.375592	0.0109822	0.720931	-0.236204	0.614736	0.91168	0.52035	-0.0722249	-0.0457007	0.807162	0.920804	0.651424	0.757106	0.863562	0.297293	0.328154	0.733384	0.115512	0.486105	0.0266505	0.666625	0.768929	0.36289	0.384524	-0.263625	-0.0586094	0.327021	0.738636	0.7403	0.324456	-0.127229	0.648356	-0.086217	0.397251	0.420422	0.654538	-0.251169
ADAMTSL2	0.384431	0.647888	0.17194	0.385191	0.565268	-0.232346	-0.244678	0.37907	-0.133621	-0.134248	0.150275	0.493622	0.239678	0.136809	0.451224	0.812518	-0.148313	0.472105	-0.0711695	-0.494999	0.279216	0.155376	0.395472	-0.107115	0.207841	0.259359	0.0927986	0.586737	0.209019	0.422412	0.293575	0.400208	0.608247	0.0949855	0.713843	0.075929	0.0926323	0.309536	0.404587	0.437944	0.234645	-0.0646651	0.812916	0.212439	0.10524	-0.0648683	0.00801185	0.0535843	0.00656558
SARDH	0.312811	0.457751	0.531787	0.562584	0.192048	0.502788	0.719415	0.30196	0.404376	0.718626	-0.127583	-0.0392537	0.242698	0.3824	0.636384	-0.258825	0.499984	0.489553	0.935305	0.172481	0.1572	0.539265	0.418026	0.942289	0.41045	0.388603	0.0673372	0.415022	0.373626	0.54074	0.877437	-0.404727	0.495333	0.364829	0.261315	0.502233	0.453872	0.181632	0.0542493	0.429195	0.501173	0.104612	-0.086915	0.321341	0.398019	0.763693	0.334634	0.573816	-0.227136
LRRC8E	0.889651	0.515672	0.709757	-0.202179	0.630864	0.284316	-0.218543	-0.163078	0.346446	0.705948	0.0834934	0.117235	0.560177	0.045787	0.493962	-0.226944	0.610591	0.705809	0.205123	0.172872	-0.225055	0.810574	0.791166	0.359228	0.792187	0.858703	0.576499	0.282843	0.719742	-0.163799	0.141389	0.312673	0.542844	0.866349	0.199565	0.432796	-0.329432	-0.260913	0.480965	0.484771	0.440129	0.536068	-0.138574	0.633919	-0.154643	0.0934612	0.556302	0.68611	0.0744746
MISP	0.963365	0.817677	0.733975	0.195462	0.749398	0.152859	-0.0162163	-0.0919011	0.190181	0.809393	-0.0533972	0.0856294	0.380263	0.0639785	0.715878	-0.170203	0.715974	0.938101	0.448961	-0.0405509	-0.093522	0.86051	0.982001	0.610314	0.81216	0.931681	0.284532	0.364257	0.847841	0.192339	0.506331	0.0662673	0.709797	0.781672	0.53769	0.293767	-0.30887	-0.0744462	0.267633	0.807702	0.802883	0.396709	-0.0529213	0.559712	-0.120216	0.488093	0.314333	0.598707	-0.32845
SEC14L5	0.595795	0.2188	0.682235	-0.185798	0.605015	0.608505	-0.118942	0.198837	0.691258	0.553859	0.364799	0.350192	0.819186	0.334208	0.263418	-0.0939384	0.469036	0.361578	0.0472314	0.506083	-0.152194	0.713533	0.491243	0.144073	0.684505	0.678383	0.850634	0.401148	0.512352	-0.364404	-0.033068	0.672294	0.378523	0.891189	0.0122531	0.6343	-0.0278342	-0.269095	0.653857	0.192185	0.0670858	0.744385	-0.00441339	0.594446	-0.0548633	-0.104253	0.771378	0.696132	0.477913
VWA7	0.756631	0.451594	0.815888	0.0030871	0.74975	0.57924	-0.0343355	0.177352	0.66052	0.75155	0.33591	0.356719	0.792117	0.368898	0.440607	-0.134481	0.677012	0.575906	0.184812	0.458199	-0.126508	0.874448	0.715819	0.336604	0.850585	0.869281	0.783078	0.454473	0.740807	-0.190722	0.156959	0.571549	0.515661	0.977676	0.204339	0.588611	-0.109441	-0.199865	0.577144	0.411583	0.339679	0.756624	-0.015894	0.645539	-0.0524435	0.162638	0.699378	0.747477	0.231195
CARNS1	0.973186	0.787614	0.755847	0.116391	0.718358	0.180155	-0.0382376	-0.120791	0.216429	0.809033	-0.0197247	0.103623	0.420599	0.0665852	0.717232	-0.169397	0.692086	0.921964	0.438098	-0.0269193	-0.0893629	0.860068	0.961672	0.597908	0.828121	0.928853	0.344883	0.371216	0.832234	0.158859	0.4665	0.0944457	0.705598	0.800192	0.467836	0.346531	-0.296713	-0.0751078	0.334836	0.749519	0.746313	0.390475	-0.0554296	0.616181	-0.0886108	0.420402	0.384241	0.647527	-0.254747
RGS2	-0.11127	0.346725	-0.0378571	0.459149	0.0986524	-0.144447	0.0215472	0.550316	-0.0981659	-0.375221	0.248163	0.543412	0.153509	0.324864	0.31863	0.954111	-0.428288	0.0550354	-0.0203626	-0.428863	0.462533	-0.186298	-0.0945522	-0.138897	-0.0665939	-0.174297	0.031763	0.606645	-0.14131	0.645561	0.301746	0.212117	0.408666	-0.294577	0.445086	0.145418	0.527789	0.543749	0.387756	-0.0426274	-0.176295	-0.380401	0.944359	0.0848059	0.526701	-0.138442	0.00614349	-0.0149404	0.213166
DSG2	0.857509	0.478373	0.704166	-0.21595	0.612409	0.31209	-0.235127	-0.13493	0.382409	0.698603	0.104353	0.12853	0.595451	0.0742621	0.462366	-0.223498	0.622908	0.660142	0.170732	0.232265	-0.260243	0.815171	0.756294	0.328402	0.802658	0.85189	0.626321	0.287983	0.722187	-0.175051	0.104953	0.336199	0.529873	0.872498	0.178456	0.451128	-0.309422	-0.290027	0.503404	0.423753	0.376861	0.565365	-0.132994	0.621169	-0.131943	0.0616906	0.580125	0.703702	0.136093
ADGRV1	0.0218655	0.467027	0.0492821	0.567491	0.211068	-0.0681758	-0.0175344	0.65828	0.00676737	-0.167315	0.0659161	0.407765	0.278055	0.35599	0.408443	0.825027	-0.132704	0.187211	0.0921157	-0.249079	0.170276	0.0853638	0.0695665	0.00925588	0.129573	0.0371939	0.143525	0.679237	0.0936777	0.752191	0.441872	0.103039	0.60662	-0.111411	0.648163	0.225192	0.530986	0.29764	0.387304	0.056522	-0.111317	-0.174544	0.875794	0.029466	0.523348	-0.00573559	0.0553016	0.168759	0.250589
ALOX15	0.697367	0.271286	0.673496	-0.270437	0.600771	0.471927	-0.202578	-0.0101698	0.550551	0.602168	0.273751	0.239595	0.698828	0.184537	0.279941	-0.205251	0.531348	0.452444	0.0353937	0.412024	-0.214015	0.731983	0.588022	0.169628	0.714925	0.74312	0.750133	0.277776	0.5878	-0.387504	-0.0628326	0.56461	0.363977	0.890116	0.0176216	0.511551	-0.225736	-0.309306	0.557577	0.273679	0.193088	0.695615	-0.128261	0.594928	-0.162225	-0.0659023	0.672337	0.656126	0.317792
BHLHE22	0.337243	0.588161	0.365687	0.414986	0.60657	0.081573	-0.135161	0.59042	0.200527	-0.0168054	0.445142	0.744308	0.550494	0.449379	0.467241	0.880226	-0.0481933	0.372652	-0.0858111	-0.195325	0.339949	0.280613	0.340999	-0.0970393	0.387672	0.336428	0.436328	0.774581	0.296021	0.406705	0.254963	0.6387	0.630782	0.264729	0.600051	0.336488	0.291358	0.364529	0.648144	0.245556	0.0536295	0.111966	0.91221	0.379182	0.318603	-0.0982331	0.294404	0.27928	0.279658
CBLN3	0.312058	-0.134115	0.448654	-0.445364	0.305225	0.533309	-0.230732	0.0438265	0.61312	0.328161	0.399603	0.263079	0.683471	0.232894	-0.0553015	-0.176411	0.304665	0.0143761	-0.211355	0.593003	-0.233005	0.451477	0.169192	-0.119609	0.473949	0.41847	0.816253	0.146572	0.291239	-0.571046	-0.373082	0.65862	0.0498776	0.682367	-0.30282	0.4904	-0.0957696	-0.345892	0.556395	-0.162941	-0.239623	0.657203	-0.140187	0.436974	-0.0902069	-0.343797	0.683371	0.516805	0.603349
CA9	0.575247	0.141047	0.572646	-0.443794	0.388617	0.431192	-0.286521	-0.032732	0.505365	0.418493	0.30626	0.268721	0.711129	0.161448	0.235322	-0.0653403	0.306561	0.303654	-0.0385718	0.343553	-0.181519	0.571329	0.386268	0.0473212	0.607582	0.564936	0.80928	0.298101	0.401836	-0.364495	-0.169991	0.560461	0.330883	0.742018	-0.142812	0.586343	-0.0961315	-0.261409	0.703258	0.0146499	-0.0807471	0.521861	-0.0148841	0.625965	0.00270289	-0.324561	0.755532	0.677877	0.553453
CDH1	0.723698	0.308148	0.703008	-0.285404	0.557814	0.450819	-0.192033	-0.0654001	0.522247	0.637546	0.276815	0.239877	0.686406	0.183406	0.338452	-0.203908	0.548269	0.484161	0.074976	0.376525	-0.194737	0.74335	0.605477	0.221402	0.756356	0.761628	0.748723	0.287647	0.621798	-0.314703	-0.0332318	0.500123	0.394751	0.875605	0.00162778	0.524868	-0.225091	-0.262543	0.577749	0.25067	0.203969	0.626991	-0.124709	0.64581	-0.0914819	-0.0478035	0.684867	0.701738	0.297883
CLDN15	0.94823	0.720552	0.839063	0.0389567	0.710988	0.327145	-0.0392631	-0.0414346	0.375819	0.808849	0.158431	0.256112	0.598638	0.199559	0.708221	-0.0900581	0.659631	0.845258	0.383782	0.0907969	-0.0389875	0.881269	0.895998	0.541476	0.892027	0.931897	0.555519	0.46945	0.818037	0.100801	0.384341	0.268514	0.704507	0.873256	0.350323	0.507249	-0.190709	-0.0408393	0.527861	0.598308	0.583807	0.451152	0.0259782	0.739531	0.0267444	0.291219	0.575644	0.768025	-0.0356091
MPZL2	0.690701	0.23887	0.631252	-0.413747	0.436798	0.391615	-0.250377	-0.150359	0.451782	0.556159	0.220962	0.174602	0.636983	0.0954398	0.309742	-0.205668	0.4409	0.436	0.0604562	0.309391	-0.213662	0.659772	0.526462	0.182309	0.680476	0.67416	0.722987	0.237327	0.520298	-0.335983	-0.0860659	0.437712	0.362936	0.797599	-0.0903147	0.526955	-0.217188	-0.279739	0.599337	0.161278	0.110904	0.52755	-0.14285	0.643832	-0.0692446	-0.166732	0.694181	0.692258	0.364234
TGM1	0.86781	0.515116	0.718103	-0.225303	0.493733	0.284868	-0.144986	-0.221853	0.319161	0.737186	0.0476371	0.0717377	0.523394	0.0446897	0.564697	-0.252876	0.592463	0.705336	0.320957	0.133102	-0.192128	0.787384	0.750778	0.467411	0.792723	0.817406	0.549801	0.288476	0.69466	-0.0459073	0.215566	0.156354	0.565014	0.801812	0.128721	0.484877	-0.250607	-0.195131	0.494721	0.408682	0.410295	0.401958	-0.157173	0.682658	-0.0126942	0.117509	0.589691	0.756116	0.078255
CLIC3	0.960196	0.830071	0.749679	0.21905	0.749968	0.166214	0.0212681	-0.0821101	0.197643	0.817437	-0.0313207	0.108759	0.380096	0.086028	0.736431	-0.156881	0.707773	0.944943	0.474159	-0.052161	-0.0498265	0.855237	0.983122	0.633273	0.812591	0.92741	0.27718	0.381485	0.843641	0.213451	0.531776	0.065283	0.713141	0.776149	0.534774	0.305476	-0.286082	-0.0322108	0.271729	0.81518	0.818083	0.378434	-0.0383692	0.579363	-0.0962592	0.511218	0.320863	0.60262	-0.344039
PITX3	-0.0737964	0.301711	-0.0617696	0.31225	0.131748	-0.1946	-0.128984	0.476993	-0.128018	-0.448104	0.286533	0.567584	0.173218	0.251488	0.24822	0.979862	-0.490295	0.0358502	-0.166297	-0.453769	0.431831	-0.215035	-0.0970232	-0.281115	-0.080635	-0.171295	0.0818517	0.560579	-0.167794	0.495219	0.148667	0.342128	0.365022	-0.266819	0.394994	0.115688	0.41969	0.487631	0.443185	-0.0652616	-0.22807	-0.34271	0.94439	0.106794	0.423672	-0.292998	0.0233016	-0.0512719	0.279433
NTF3	-0.177131	0.264097	0.077006	0.703815	0.0240331	0.219102	0.675169	0.58348	0.128498	-0.0160411	0.0449957	0.243461	0.016408	0.395676	0.385646	0.395488	-0.234208	0.107174	0.59214	-0.226951	0.579612	-0.0984825	-0.0624061	0.432044	-0.168561	-0.206748	-0.21975	0.481945	-0.221974	0.612035	0.719074	-0.172285	0.279544	-0.209757	0.29141	0.273178	0.72793	0.560283	0.0360322	0.213381	0.165117	-0.29454	0.461643	0.0495775	0.478463	0.416911	0.0406493	0.0429313	-0.118034
KCNA5	0.144669	0.558248	0.111585	0.510395	0.318707	-0.15166	0.0352519	0.492364	-0.109966	-0.214631	0.200365	0.538506	0.173603	0.272665	0.487261	0.901224	-0.320737	0.320448	0.108603	-0.532924	0.502256	-0.0250149	0.16903	0.00937196	0.0551818	0.0230977	0.000533601	0.656455	0.0036679	0.635656	0.443592	0.232921	0.553027	-0.125938	0.589142	0.165483	0.410243	0.551741	0.393967	0.258964	0.107076	-0.307888	0.907566	0.206992	0.399244	-0.00114517	0.0275435	0.0481169	0.0416992
TMEM102	0.783932	0.411239	0.750364	-0.209807	0.629004	0.457511	-0.172143	0.0134277	0.531476	0.644056	0.285758	0.304363	0.736362	0.22346	0.440655	-0.096747	0.523111	0.568706	0.13626	0.306349	-0.130656	0.778687	0.664439	0.265033	0.786623	0.795504	0.764746	0.401937	0.637853	-0.226026	0.0668476	0.528856	0.508225	0.897949	0.098035	0.586687	-0.154555	-0.200171	0.652215	0.324841	0.246186	0.607143	-0.00826548	0.701042	-0.0388237	-0.031659	0.723466	0.747721	0.309511
SUSD2	0.174834	0.60722	0.208956	0.575348	0.36421	-0.0495594	0.0405288	0.597284	0.0155454	-0.10527	0.252191	0.598874	0.317902	0.401372	0.541845	0.917274	-0.171882	0.337934	0.123545	-0.38534	0.423073	0.112984	0.212408	0.0563294	0.209071	0.132929	0.15816	0.760065	0.145804	0.721892	0.479768	0.263878	0.64859	-0.0241538	0.645767	0.263914	0.472391	0.510512	0.484074	0.208845	0.0628379	-0.20625	0.95437	0.246941	0.507695	0.0380582	0.122606	0.191212	0.13796
MRGPRF	0.909846	0.697968	0.754284	-0.0156558	0.670684	0.262564	-0.217058	0.0429679	0.34804	0.67647	0.118854	0.268688	0.668663	0.185953	0.676568	0.0665231	0.582651	0.783653	0.262546	0.0821792	-0.159647	0.856366	0.819945	0.396972	0.876824	0.887117	0.649329	0.538472	0.780704	0.153012	0.312798	0.311962	0.780636	0.824851	0.409123	0.538034	-0.128119	-0.129484	0.646887	0.469077	0.388458	0.437151	0.176673	0.684545	0.0946732	0.096101	0.602279	0.793785	0.17356
HEBP2	0.125491	0.232903	0.568487	0.441685	0.449212	0.768407	0.268352	0.86968	0.851464	0.37895	0.502895	0.621198	0.907332	0.824514	0.327006	0.371517	0.354053	0.0944187	0.189771	0.617284	0.071951	0.561308	0.15946	0.201475	0.560354	0.396412	0.842471	0.787066	0.374019	0.246078	0.305805	0.580064	0.49751	0.570538	0.254906	0.760698	0.645471	0.0601447	0.682765	-0.0700764	-0.210393	0.565219	0.512695	0.377584	0.517905	0.0903119	0.712808	0.675937	0.643896
PKP1	0.88999	0.545857	0.747577	-0.172528	0.647637	0.319244	-0.206583	-0.0942851	0.38792	0.696617	0.153274	0.207378	0.628768	0.117554	0.538528	-0.129325	0.58467	0.70881	0.206853	0.170143	-0.169927	0.819644	0.784369	0.354377	0.823579	0.863725	0.641045	0.371533	0.724158	-0.109689	0.163507	0.370638	0.593484	0.87488	0.215939	0.497783	-0.254898	-0.200148	0.570055	0.453925	0.398981	0.523638	-0.0372979	0.68778	-0.0702765	0.06628	0.615939	0.734205	0.14184
SCEL	0.542744	0.15127	0.652152	-0.216946	0.587225	0.590895	-0.135012	0.144449	0.678395	0.534881	0.418444	0.35783	0.775446	0.326077	0.17109	-0.139669	0.485171	0.291337	-0.0476318	0.551263	-0.155775	0.671549	0.453498	0.0736319	0.665066	0.65814	0.831761	0.31441	0.514298	-0.444364	-0.136344	0.707178	0.267724	0.870378	-0.048268	0.5497	-0.111868	-0.273413	0.586608	0.149228	0.0571853	0.765987	-0.0648925	0.554122	-0.114304	-0.104139	0.712542	0.619999	0.432372
AKR1E2	0.181524	0.0593028	0.615793	0.177107	0.367752	0.887162	0.533459	0.546128	0.854129	0.435274	0.493586	0.477774	0.727737	0.630304	0.290642	0.0172583	0.146483	0.128488	0.432363	0.481785	0.365383	0.409845	0.148531	0.382607	0.335591	0.267285	0.633036	0.545001	0.0852462	-0.155466	0.306135	0.538334	0.229489	0.600441	-0.154732	0.807767	0.562144	0.173732	0.559105	0.101314	0.00395411	0.485761	0.124943	0.559281	0.277709	0.131594	0.806066	0.594926	0.442526
NKPD1	0.0487278	-0.12859	0.476181	0.00012225	0.398221	0.768076	0.108232	0.547324	0.847449	0.240136	0.678761	0.603874	0.821277	0.638563	-0.0459683	0.13853	0.205329	-0.137252	-0.1553	0.708653	0.0888632	0.367236	0.0138862	-0.120143	0.392637	0.27983	0.857612	0.428076	0.18563	-0.37771	-0.192696	0.867599	0.0541184	0.601484	-0.176362	0.603684	0.309479	-0.0500151	0.603012	-0.197537	-0.310753	0.691656	0.199244	0.384425	0.142072	-0.182757	0.708427	0.453337	0.665889
DDR1	0.462392	0.62544	0.890689	0.63791	0.525789	0.769786	0.685584	0.573931	0.747046	0.81888	0.445583	0.559031	0.717889	0.800019	0.785801	0.13159	0.571974	0.556697	0.748212	0.336486	0.409599	0.742997	0.550505	0.816469	0.762616	0.640214	0.562941	0.806368	0.613356	0.537764	0.788206	0.195894	0.667908	0.663774	0.312728	0.785031	0.56146	0.420663	0.529387	0.367837	0.414158	0.327439	0.314275	0.697148	0.604983	0.649062	0.687857	0.826537	0.0541731
CKMT1A	0.974869	0.767538	0.742402	0.0768087	0.708204	0.167631	-0.0677646	-0.14698	0.205416	0.7954	-0.0285216	0.087713	0.41444	0.0406244	0.696826	-0.182683	0.681159	0.911858	0.415122	-0.0284253	-0.108748	0.850703	0.953665	0.574841	0.818294	0.922456	0.347404	0.348242	0.820798	0.126165	0.434487	0.100077	0.689603	0.799521	0.447108	0.337715	-0.320052	-0.0982781	0.335405	0.73731	0.730995	0.393274	-0.0735569	0.612224	-0.110811	0.389174	0.384259	0.640014	-0.24188
LGR6	-0.0762264	0.142843	0.245213	0.33065	-0.0524703	0.469651	0.565006	0.589343	0.384052	0.00614419	0.201284	0.367309	0.371293	0.473685	0.448395	0.453447	-0.355064	0.0667647	0.598891	-0.0996507	0.565619	-0.012697	-0.135306	0.398593	-0.0476517	-0.177638	0.210159	0.649261	-0.303163	0.442222	0.587379	0.0528606	0.376885	-0.0144959	-0.00216519	0.697137	0.915037	0.493557	0.508288	-0.0505528	-0.167958	-0.224032	0.526276	0.379458	0.672912	0.0260822	0.534634	0.406878	0.412435
KLHL30	-0.0225551	0.455643	0.12576	0.667625	0.145907	0.0977863	0.268006	0.717063	0.115465	-0.0640667	0.0764059	0.398814	0.277749	0.454837	0.497896	0.737598	-0.141937	0.196871	0.350178	-0.219655	0.327397	0.0844981	0.0408909	0.233545	0.0969424	-0.0120743	0.0984782	0.728369	0.0228445	0.821306	0.632015	-0.00908004	0.60114	-0.11333	0.560849	0.358045	0.718718	0.424569	0.365713	0.0856637	-0.0475266	-0.227242	0.815156	0.102862	0.643715	0.15609	0.14446	0.244546	0.203435
NRIP2	0.489072	0.829675	0.620078	0.717897	0.554181	0.31813	0.387877	0.625481	0.33096	0.434507	0.216068	0.542367	0.527296	0.565908	0.869852	0.579634	0.227225	0.6693	0.621979	-0.177825	0.434406	0.534436	0.552486	0.600454	0.546842	0.487518	0.305776	0.908229	0.448143	0.794703	0.862868	0.133571	0.878729	0.371192	0.676173	0.587654	0.562467	0.490889	0.546034	0.500209	0.407261	0.0175336	0.714511	0.533787	0.581164	0.441858	0.419442	0.594965	0.0182944
HES6	-0.0651998	0.329498	-0.00357023	0.378676	0.1873	-0.133638	-0.0765642	0.530306	-0.0628356	-0.392725	0.351079	0.628121	0.221005	0.328294	0.267889	0.984285	-0.430004	0.049038	-0.153447	-0.396267	0.46254	-0.167427	-0.0658186	-0.252586	-0.026542	-0.1244	0.121708	0.6006	-0.111291	0.508557	0.17403	0.389577	0.376265	-0.217531	0.41834	0.139148	0.436265	0.517684	0.452856	-0.0428721	-0.194795	-0.288548	0.95922	0.131827	0.441442	-0.229603	0.0459725	-0.0254391	0.262915
PER2	0.110142	0.444609	0.137291	0.387659	0.337916	-0.0453443	-0.0436779	0.550248	0.0207106	-0.266522	0.346727	0.651678	0.323756	0.342505	0.393811	0.953068	-0.36872	0.213744	-0.0333904	-0.406455	0.490501	-0.0282983	0.093136	-0.13552	0.0731746	0.0117278	0.189931	0.688884	-0.0357649	0.473422	0.278562	0.453155	0.498462	-0.0517368	0.47477	0.259568	0.437398	0.50449	0.541867	0.124826	-0.063817	-0.193399	0.948951	0.263353	0.397973	-0.180814	0.168669	0.0949851	0.258105
KCTD14	0.285499	0.646727	0.323311	0.602564	0.426543	0.132439	0.200923	0.662967	0.15984	0.0503695	0.143046	0.506205	0.405348	0.416997	0.65866	0.770027	-0.12025	0.461199	0.393648	-0.33369	0.422935	0.242853	0.30622	0.285042	0.236205	0.199471	0.190106	0.830286	0.13152	0.687965	0.676141	0.203965	0.751001	0.12505	0.641435	0.459846	0.596594	0.446809	0.525072	0.360776	0.167927	-0.109219	0.84806	0.335027	0.494923	0.137504	0.287112	0.347756	0.165385
LMOD1	-0.00361589	0.447273	0.0427692	0.495361	0.195719	-0.130374	-0.0173313	0.569809	-0.0658938	-0.280996	0.238364	0.557845	0.223891	0.34839	0.392749	0.95237	-0.311903	0.154395	-0.00133847	-0.398983	0.399859	-0.0618619	0.020306	-0.0924173	0.0553842	-0.0466313	0.0984769	0.664202	-0.00854335	0.688568	0.346513	0.229829	0.511876	-0.193869	0.541511	0.176939	0.491153	0.499334	0.430815	0.0283714	-0.112485	-0.305577	0.960559	0.12637	0.524221	-0.0930414	0.0396888	0.0678002	0.206869
RSPH6A	-0.0188796	0.197317	0.416725	0.578706	0.0245195	0.587266	0.960006	0.351732	0.441144	0.496255	0.145914	0.142982	0.131486	0.501504	0.439858	-0.16794	0.193048	0.18848	0.853368	0.159115	0.529102	0.199544	0.105741	0.80515	0.125326	0.0626445	-0.0481445	0.338627	0.0433752	0.403727	0.749251	-0.265141	0.161835	0.137212	-0.0272961	0.449765	0.603057	0.478961	-0.0209277	0.241872	0.364815	-0.0450127	-0.0460142	0.294844	0.451285	0.719252	0.288887	0.335261	-0.242701
PRRG3	0.979883	0.79001	0.78424	0.0745354	0.690751	0.227209	-0.0583291	-0.058369	0.267051	0.778457	0.0165537	0.16557	0.519252	0.11373	0.76949	-0.0678011	0.62192	0.915356	0.45704	-0.0359767	-0.0647543	0.864271	0.926443	0.590711	0.846218	0.911115	0.448617	0.474536	0.792829	0.201413	0.481002	0.139739	0.780602	0.809769	0.444196	0.472965	-0.180064	-0.0501029	0.485605	0.67229	0.636906	0.361186	0.0504422	0.694081	0.0265294	0.313656	0.506733	0.745327	-0.0941573
C22orf39	0.325967	0.616714	0.46551	0.608298	0.399337	0.301309	0.557305	0.49768	0.23904	0.259821	0.191241	0.450017	0.298852	0.425428	0.724168	0.471435	-0.0788749	0.533421	0.683535	-0.330731	0.667915	0.242337	0.367912	0.57783	0.206088	0.204018	0.0461933	0.715509	0.0864243	0.569645	0.816005	0.0894392	0.605959	0.188168	0.420706	0.506732	0.583935	0.611935	0.378605	0.517806	0.430005	-0.141425	0.559606	0.484059	0.438057	0.405165	0.337921	0.359659	-0.101776
PARD6B	0.787991	0.370511	0.690033	-0.331346	0.507645	0.361586	-0.220328	-0.157561	0.41815	0.632471	0.181015	0.170954	0.62357	0.0912338	0.422128	-0.197329	0.5031	0.563912	0.149475	0.239122	-0.189879	0.729898	0.641721	0.282541	0.744845	0.756707	0.680721	0.284462	0.605527	-0.237286	0.0306059	0.380784	0.461648	0.831156	0.0177384	0.524049	-0.236189	-0.240175	0.586689	0.286082	0.243475	0.507022	-0.121423	0.681839	-0.0614214	-0.0618321	0.671561	0.725618	0.260263
EPHB6	0.974387	0.836135	0.770784	0.167715	0.763759	0.156938	-0.0546913	-0.077371	0.207108	0.779855	0.0559105	0.200563	0.442838	0.114689	0.739852	-0.0599497	0.673538	0.931541	0.388154	-0.0609887	-0.029092	0.851033	0.973521	0.554798	0.850864	0.940137	0.362188	0.427448	0.856948	0.206833	0.462488	0.164026	0.732381	0.787876	0.52057	0.332587	-0.289775	-0.00320299	0.372561	0.752563	0.74809	0.373158	0.0483417	0.636081	-0.0553998	0.414382	0.369976	0.630129	-0.258937
[truncated: 61 more rows]
[truncated: 7 more columns]

## Sheet: GeneCorMet_visceral.p
	23-Nordeoxycholic acid	L-Tryptophan	PC (18:0/20:4)	11(E)-Eicosenoic Acid	10-Hydroxydecanoic acid	PC (18:0/20:3)	SM (d14:1/20:0)	PC (16:0/16:1)	PC (18:0/22:4)	2-(3,4-dimethoxyphenyl)ethanamine	PC (16:0/18:1)	PC (16:1e/18:2)	PC (18:1e/18:2)	methadone-d9	(2R,3S,4S,5R,6R)-2-(hydroxymethyl)-6-(propan-2-yloxy)oxane-3,4,5-triol	PC (16:1e/19:2)	ACar 15:1	Biliverdin	Bicyclo prostaglandin E2	2-(2-amino-3-methylbutanamido)-3-phenylpropanoic acid	PC (17:0/18:2)	ACar 20:1	Palmitoylcarnitine	cis-gondoic acid	ACar 20:0	ACar 18:0	16-Heptadecyne-1,2,4-triol	5-OxoETE	ACar 18:1	PC (18:1e/14:1)	9-Oxo-ODE	PC (18:3e/20:2)	PC (20:0/20:3)	Prostaglandin E2	2-[(3S)-1-(2-Methylbenzyl)-3-pyrrolidinyl]-1H-imidazo[4,5-b]pyridine	4,6,8-trihydroxy-7-methoxy-3-methyl-3,4-dihydro-1H-2-benzopyran-1-one	PC (14:1e/19:2)	PC (18:3e/15:0)	Radicinin	PC (14:0e/18:0)	PC (18:1e/16:2)	ACar 13:0	PC (19:1/18:2)	PC (18:5e/4:0)	PC (20:5e/15:1)	DL-Dipalmitoylphosphatidylcholine	2-(2,4-dihydroxyphenyl)-3,5,7-trihydroxy-4H-chromen-4-one	4-morpholino-3-nitrobenzene-1-sulfonamide	PC (18:4e/17:1)
[truncated: 211 more rows]
[truncated: 7 more columns]
